# Supplementary material for: DFT investigation of Cu(i)-catalyzed addition of 1,4-pentadiene to acetophenone: mechanism and selectivity for the synthesis of a chiral tertiary alcohol with a 1,3-diene unit
Source: Royal Society of Chemistry journal article supplement (doi:10.1039/d3qo01970e), 2024-01-01
Supplement: d3qo01970e1.pdf [file d3qo01970e1.pdf]

*Supplementary Information*

DFT investigation of Cu(I)-catalyzed addition of 1,4-pentadiene to acetophenone:  
mechanism and selectivity for the synthesis of a chiral tertiary alcohol with a 1,3-  
diene unit

Jihong Xu, Yiying, Yang, Chengbu Liu, and Dongju Zhang\*

Key Lab of Colloid and Interface Chemistry, Ministry of Education, Institute of  
Theoretical Chemistry, School of Chemistry and Chemical Engineering, Shandong  
University, Jinan 250100, P. R. China

Corresponding author:

E-mail: zhangdj@sdu.edu.cn

Tel: +86-0531-88365833

Fax: +86-0531-88564464

## Table of Contents

|                                                                                                                                                                                                      |    |
|------------------------------------------------------------------------------------------------------------------------------------------------------------------------------------------------------|----|
| I. Formation of branched products ( <b>S</b> )- <b>P<sub>b</sub></b> and ( <b>R</b> )- <b>P<sub>b</sub></b> with the ligands ( <i>R</i> )-DTBM-SEGPHOS) and ( <i>R,R</i> )-Ph-BPE, respectively..... | S3 |
| II. NBO analyses for ( <b>S</b> )- <b>TS4</b> and ( <b>R</b> )- <b>TS4'</b> .....                                                                                                                    | S3 |
| III. Calculated energies and imaginary frequencies.....                                                                                                                                              | S4 |
| IV. Cartesian coordinates of all the structures.....                                                                                                                                                 | S6 |

I. Formation of branched products (**S**)-**P<sub>b</sub>** and (**R**)-**P<sub>b</sub>** with the ligands (*R*)-DTBM-SEGPPOS) and (*R,R*)-Ph-BPE, respectively

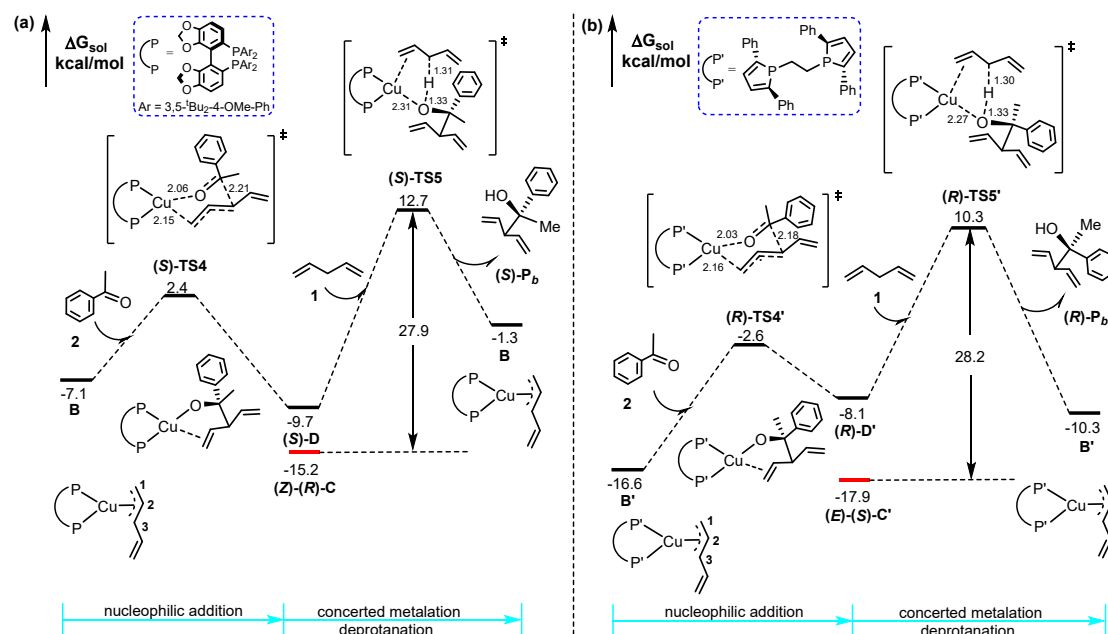

**Fig. S1.** Calculated Gibbs energy profiles for the formation of (a) (*S*)-type branched product (**S**)-**P<sub>b</sub>** with the (*R*)-DTBM-SEGPPOS ligand and (b) (*R*)-type branched product (**R**)-**P<sub>b</sub>** with the (*R,R*)-Ph-BPE ligand. Bond distances are in Å.

II. NBO analyses for (**S**)-**TS4** and (**R**)-**TS4'**

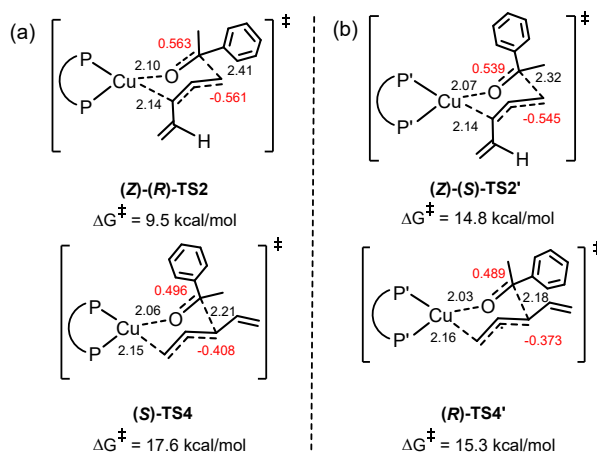

**Fig. S2** NBO analyses for (a) the regioselectivity-determining transition states (**Z**)-(**R**)-**TS2** and (**S**)-**TS4**, as well as (b) (**Z**)-(**S**)-**TS2'** and (**R**)-**TS4'**. Energy barriers associated

with these transition states are given in kcal mol<sup>-1</sup>, bond distances are in Å (black color), and electron charges are in *e* (red color).

### III. Calculated energies and imaginary frequencies

| Stationary point       | Thermal correction to Gibbs free energy at M06 (gas) /Lanl2dz/6-31G(d,p) (in a.u.) (1) | Single-point energy at M06 (SMD-N,N-Dimethylformamide) /SDD/6-311+G(d,p) (in a.u.) (2) | Gibbs free energies (G) (in a.u.) (3)=(1)+(2) | Imaginary frequencies (cm <sup>-1</sup> ) |
|------------------------|----------------------------------------------------------------------------------------|----------------------------------------------------------------------------------------|-----------------------------------------------|-------------------------------------------|
| 1,4-pentadiene         | 0.082563                                                                               | -195.1857521                                                                           | -195.10319                                    |                                           |
| acetophenone           | 0.10523                                                                                | -384.7253913                                                                           | -384.62016                                    |                                           |
| 1,3,5-trimethylbenzene | 0.149524                                                                               | -350.0048127                                                                           | -349.85529                                    |                                           |
| A                      | 1.643751                                                                               | -4709.779846                                                                           | -4708.1361                                    |                                           |
| TS1                    | 1.751219                                                                               | -4904.938789                                                                           | -4903.1876                                    | -1262.64                                  |
| B                      | 1.578049                                                                               | -4554.973289                                                                           | -4553.3952                                    |                                           |
| A'                     | 0.706405                                                                               | -2546.16928                                                                            | -2545.4629                                    |                                           |
| TS1'                   | 0.809339                                                                               | -2741.329967                                                                           | -2740.5206                                    | -1141.61                                  |
| B'                     | 0.638406                                                                               | -2391.375315                                                                           | -2390.7369                                    |                                           |
| (Z)-(R)-TS2            | 1.706872                                                                               | -4939.710242                                                                           | -4938.0034                                    | -185.25                                   |
| (E)-(R)-TS2            | 1.710468                                                                               | -4939.706518                                                                           | -4937.996                                     | -213.49                                   |
| (Z)-(R)-C              | 1.715543                                                                               | -4939.733988                                                                           | -4938.0184                                    |                                           |
| (E)-(R)-C              | 1.713454                                                                               | -4939.731048                                                                           | -4938.0176                                    |                                           |
| (Z)-(R)-TS3            | 1.815053                                                                               | -5134.899636                                                                           | -5133.0846                                    | -1557.94                                  |
| (E)-(R)-TS3            | 1.818883                                                                               | -5134.901594                                                                           | -5133.0827                                    | -1524.80                                  |
| (Z)-(R)-P <sub>1</sub> | 0.215713                                                                               | -579.9288337                                                                           | -579.71312                                    |                                           |
| (E)-(R)-P <sub>1</sub> | 0.213536                                                                               | -579.9302665                                                                           | -579.71673                                    |                                           |
| (Z)-(S)-TS2            | 1.711333                                                                               | -4939.711488                                                                           | -4938.0002                                    | -189.21                                   |

|                              |          |              |            |          |
|------------------------------|----------|--------------|------------|----------|
| <b>(E)-(S)-TS2</b>           | 1.70895  | -4939.704368 | -4937.9954 | -241.24  |
| <b>(Z)-(S)-C</b>             | 1.717562 | -4939.731061 | -4938.0135 |          |
| <b>(E)-(S)-C</b>             | 1.720558 | -4939.727121 | -4938.0066 |          |
| <b>(Z)-(S)-TS3</b>           | 1.818623 | -5134.900071 | -5133.0814 | -1528.06 |
| <b>(E)-(S)-TS3</b>           | 1.821816 | -5134.902608 | -5133.0808 | -1534.86 |
| <b>(Z)-(S)-P<sub>l</sub></b> | 0.216135 | -579.9305953 | -579.71446 |          |
| <b>(E)-(S)-P<sub>l</sub></b> | 0.214027 | -579.9312622 | -579.71724 |          |
| <b>(Z)-(S)-TS2'</b>          | 0.770109 | -2776.095858 | -2775.3257 | -247.64  |
| <b>(E)-(S)-TS2'</b>          | 0.771234 | -2776.095368 | -2775.3241 | -170.59  |
| <b>(Z)-(S)-C'</b>            | 0.773792 | -2776.122435 | -2775.3486 |          |
| <b>(E)-(S)-C'</b>            | 0.773893 | -2776.123241 | -2775.3493 |          |
| <b>(Z)-(S)-TS3'</b>          | 0.877526 | -2971.294132 | -2970.4166 | -1567.91 |
| <b>(E)-(S)-TS3'</b>          | 0.878669 | -2971.294874 | -2970.4162 | -1521.85 |
| <b>(Z)-(R)-TS2'</b>          | 0.770683 | -2776.094303 | -2775.3236 | -287.10  |
| <b>(E)-(R)-TS2'</b>          | 0.771537 | -2776.093598 | -2775.3221 | -195.92  |
| <b>(Z)-(R)-C'</b>            | 0.776345 | -2776.125628 | -2775.3493 |          |
| <b>(E)-(R)-C'</b>            | 0.774571 | -2776.120021 | -2775.3455 |          |
| <b>(Z)-(R)-TS3'</b>          | 0.879137 | -2971.29303  | -2970.4139 | -1502.14 |
| <b>(E)-(R)-TS3'</b>          | 0.878349 | -2970.4148   | -2970.4148 | -1465.92 |
| <b>(R)-TS4</b>               | 1.712708 | -4939.709733 | -4937.997  | -305.88  |
| <b>(R)-D</b>                 | 1.714023 | -4939.721706 | -4938.0077 |          |
| <b>(R)-TS5</b>               | 1.819424 | -5134.885907 | -5133.0665 | -1583.03 |
| <b>(R)-P<sub>b</sub></b>     | 0.214505 | -579.9185107 | -579.70401 |          |
| <b>(S)-TS4</b>               | 1.714997 | -4939.705526 | -4937.9905 | -308.56  |
| <b>(S)-D</b>                 | 1.712741 | -4939.722464 | -4938.0097 |          |
| <b>(S)-TS5</b>               | 1.819414 | -5134.889728 | -5133.0703 | -1572.15 |
| <b>(S)-P<sub>b</sub></b>     | 0.21389  | -579.9181915 | -579.7043  |          |
| <b>(S)-TS4'</b>              | 0.77335  | -2776.092779 | -2775.3194 | -327.09  |
| <b>(S)-D'</b>                | 0.775196 | -2776.108221 | -2775.333  |          |
| <b>(S)-TS5'</b>              | 0.88091  | -2971.277347 | -2970.3964 | -1512.59 |
| <b>(R)-TS4'</b>              | 0.7733   | -2776.098152 | -2775.3249 | -324.04  |
| <b>(R)-D'</b>                | 0.775499 | -2776.109158 | -2775.3337 |          |

|                 |          |              |            |          |
|-----------------|----------|--------------|------------|----------|
| <b>(R)-TS5'</b> | 0.878218 | -2971.279454 | -2970.4012 | -1539.79 |
|-----------------|----------|--------------|------------|----------|

#### IV. Cartesian coordinates of all the structures

##### 1,4-pentadiene

|   |             |             |             |
|---|-------------|-------------|-------------|
| C | -0.00000800 | -0.26960900 | 0.68067500  |
| C | -1.24370100 | -0.40756500 | -0.14600100 |
| H | -0.00006800 | 0.69744900  | 1.20559600  |
| H | -0.00019500 | -1.05275500 | 1.45952000  |
| C | -2.21513300 | 0.49718000  | -0.21441300 |
| H | -1.32531400 | -1.32846600 | -0.73133600 |
| H | -3.09928100 | 0.34750300  | -0.83096900 |
| H | -2.16505100 | 1.42953300  | 0.34944000  |
| C | 1.24384900  | -0.40766000 | -0.14569400 |
| H | 1.32588900  | -1.32887200 | -0.73049400 |
| C | 2.21501500  | 0.49733300  | -0.21452100 |
| H | 2.16462100  | 1.42995500  | 0.34886600  |
| H | 3.09926800  | 0.34757500  | -0.83090200 |

##### acetophenone

|   |             |             |             |
|---|-------------|-------------|-------------|
| C | 1.81859500  | 1.27104000  | -0.00001900 |
| C | 0.43048100  | 1.19361700  | -0.00004100 |
| C | -0.20643500 | -0.05101300 | -0.00002300 |
| C | 0.56874000  | -1.21461500 | 0.00002800  |
| C | 1.95322000  | -1.13836600 | 0.00002600  |
| C | 2.58019400  | 0.10654100  | 0.00000700  |
| H | 2.30731900  | 2.24385400  | -0.00001600 |
| H | -0.15529000 | 2.11185000  | -0.00007500 |
| H | 0.05234300  | -2.17243700 | 0.00005100  |
| H | 2.55007600  | -2.04882500 | 0.00004800  |
| H | 3.66723900  | 0.16982100  | 0.00002800  |
| C | -1.69100900 | -0.20201900 | -0.00001300 |
| O | -2.20527100 | -1.30519800 | -0.00005300 |
| C | -2.53985800 | 1.04466500  | 0.00005800  |
| H | -3.59323000 | 0.75237800  | 0.00015400  |
| H | -2.33483900 | 1.66292400  | 0.88410700  |
| H | -2.33501100 | 1.66292200  | -0.88401200 |

##### 1,3,5-trimethylbenzene

|   |             |             |             |
|---|-------------|-------------|-------------|
| C | -1.37752500 | 0.13602500  | -0.01404100 |
| C | -0.57483300 | 1.28122600  | -0.00511500 |
| C | 0.80677500  | 1.12519100  | 0.00465200  |
| C | 1.39740500  | -0.14262200 | 0.00653400  |
| C | 0.57125900  | -1.26108500 | 0.00179100  |
| C | -0.82188300 | -1.13884400 | -0.00716000 |

|   |             |             |             |
|---|-------------|-------------|-------------|
| H | -2.46455700 | 0.24669500  | -0.02544900 |
| H | 1.44597200  | 2.01146300  | 0.00853400  |
| H | 1.01927400  | -2.25774600 | 0.00288500  |
| C | 2.89111100  | -0.28168500 | -0.00308800 |
| H | 3.31818200  | 0.04526100  | -0.96170900 |
| H | 3.35807300  | 0.33261700  | 0.77850200  |
| H | 3.20011600  | -1.32175500 | 0.15751100  |
| C | -1.68984000 | -2.36243200 | 0.00624500  |
| H | -1.36146300 | -3.09861300 | -0.73958200 |
| H | -1.65896800 | -2.86432300 | 0.98377600  |
| H | -2.73782000 | -2.11534700 | -0.20302600 |
| C | -1.20184000 | 2.64403900  | 0.00482300  |
| H | -1.95432300 | 2.74699500  | -0.78860100 |
| H | -1.71453300 | 2.84251600  | 0.95661700  |
| H | -0.45373000 | 3.43336600  | -0.13730800 |

**A**

|   |             |             |             |
|---|-------------|-------------|-------------|
| P | 1.77387500  | 0.07928200  | -0.20211800 |
| C | 1.17850500  | 1.53482600  | -1.15108700 |
| C | 2.98548900  | -0.76492900 | -1.27896900 |
| C | 2.82157200  | 0.87073200  | 1.06663600  |
| C | 0.20980500  | 2.36114100  | -0.51297800 |
| C | 1.59686100  | 1.80314400  | -2.45303700 |
| C | 2.54328800  | -1.35938700 | -2.46446200 |
| C | 4.30295900  | -0.95036600 | -0.89133000 |
| C | 3.68446800  | 1.90368300  | 0.72632100  |
| C | 2.75617500  | 0.44523900  | 2.39112900  |
| C | -0.20365700 | 2.20485500  | 0.91050400  |
| C | -0.27597200 | 3.40607300  | -1.26903000 |
| C | 1.08638500  | 2.87851800  | -3.19544800 |
| H | 2.34652800  | 1.16076600  | -2.91404000 |
| C | 3.37631600  | -2.16167500 | -3.23821100 |
| H | 1.51341300  | -1.18453800 | -2.77754900 |
| C | 5.19455300  | -1.75821900 | -1.60948100 |
| H | 4.64956100  | -0.46514400 | 0.01804300  |
| C | 4.56327600  | 2.47956300  | 1.64809400  |
| H | 3.67941500  | 2.26398400  | -0.30268300 |
| C | 3.61002500  | 0.96463000  | 3.36433400  |
| H | 2.02474700  | -0.31961200 | 2.64967100  |
| C | -1.13985100 | 1.25084400  | 1.40320300  |
| C | 0.36372900  | 3.03214500  | 1.85891400  |
| C | 0.14005100  | 3.65599900  | -2.57378900 |
| H | 1.42057600  | 3.08858400  | -4.20880100 |
| C | 4.67389300  | -2.42744500 | -2.73021100 |

|   |             |             |             |
|---|-------------|-------------|-------------|
| C | 4.58071300  | 1.90252500  | 2.93554000  |
| P | -1.79729600 | -0.01035800 | 0.24659500  |
| C | -1.39001900 | 1.15005000  | 2.77253300  |
| C | 0.08103700  | 2.93905600  | 3.21776200  |
| C | -3.22654800 | -0.77564300 | 1.09805400  |
| C | -2.57910200 | 0.97747000  | -1.08871700 |
| C | -0.78677700 | 1.99772600  | 3.71349600  |
| H | -2.08382600 | 0.38981300  | 3.12781700  |
| C | -4.25054400 | -0.07143800 | 1.73868900  |
| C | -3.33792200 | -2.15410200 | 0.97657800  |
| C | -3.49650100 | 1.99146500  | -0.84956900 |
| C | -2.24401600 | 0.67424400  | -2.40460600 |
| H | -0.99693100 | 1.92001000  | 4.77753800  |
| C | -5.32954600 | -0.72113100 | 2.32776700  |
| H | -4.18337700 | 1.01120800  | 1.79943000  |
| C | -4.43382000 | -2.87117700 | 1.47955400  |
| H | -2.53135400 | -2.68837800 | 0.47400800  |
| C | -4.18356500 | 2.64381000  | -1.87865900 |
| H | -3.69066000 | 2.28097200  | 0.18009600  |
| C | -2.85118200 | 1.30959700  | -3.48710800 |
| H | -1.47357900 | -0.07720700 | -2.56862700 |
| C | -5.36606800 | -2.13782700 | 2.23583400  |
| C | -3.89270900 | 2.22412900  | -3.19679000 |
| C | -1.54954200 | 4.98939600  | -2.12056100 |
| H | -2.48472400 | 4.54000100  | -2.50681500 |
| H | -1.66035500 | 6.06489900  | -1.94863300 |
| O | -1.19211300 | 4.34868700  | -0.90500900 |
| O | -0.50388500 | 4.75864500  | -3.04952200 |
| H | 1.75884300  | 5.49608400  | 3.03128800  |
| C | 1.70761100  | 4.40505000  | 2.95080700  |
| H | 2.69441800  | 3.94057800  | 3.13392100  |
| O | 0.77291600  | 3.90271000  | 3.89105300  |
| O | 1.25389800  | 4.04488100  | 1.65554500  |
| O | 5.42150500  | -3.37882400 | -3.38815300 |
| O | 5.56373200  | 2.25702100  | 3.83303400  |
| O | -4.59560700 | 2.73319500  | -4.26733700 |
| O | -6.38337300 | -2.77638400 | 2.90995900  |
| C | 6.77747700  | 1.56845300  | 3.60831900  |
| H | 7.45439800  | 1.84087500  | 4.42512500  |
| H | 6.62520800  | 0.47828800  | 3.60928500  |
| H | 7.24033500  | 1.85064900  | 2.64997200  |
| C | 3.42528200  | 0.60200800  | 4.84568800  |
| C | 5.38637600  | 3.69015500  | 1.16279400  |
| C | 6.64832800  | -1.81179300 | -1.10038500 |



|    |             |             |             |
|----|-------------|-------------|-------------|
| C  | 5.39157300  | -4.64305300 | -2.75414000 |
| H  | 5.83267800  | -5.36191000 | -3.45349100 |
| H  | 5.97640200  | -4.64847500 | -1.82240600 |
| H  | 4.36211200  | -4.94880300 | -2.51711300 |
| C  | 2.92837400  | -2.65007100 | -4.62485100 |
| C  | -5.22319900 | 3.70976100  | -1.47382000 |
| C  | -2.34554000 | 1.05424300  | -4.91610400 |
| C  | -5.84569900 | 2.12479300  | -4.52048000 |
| H  | -6.66271900 | 2.64304800  | -3.99716800 |
| H  | -6.03500300 | 2.19147600  | -5.59824000 |
| H  | -5.84612700 | 1.06716900  | -4.21989000 |
| C  | -6.47249100 | 0.08750000  | 2.96406500  |
| C  | -4.51295500 | -4.36921100 | 1.12425400  |
| C  | -5.97646200 | -3.39367900 | 4.11385000  |
| H  | -6.88797500 | -3.65795100 | 4.66166500  |
| H  | -5.39601200 | -4.30781800 | 3.93064600  |
| H  | -5.36918400 | -2.71259500 | 4.72848100  |
| C  | -0.24267200 | -6.21101400 | 1.05132700  |
| C  | -0.41499700 | -5.69185800 | -0.23016700 |
| C  | -0.28911800 | -4.32143800 | -0.48220600 |
| C  | -0.00289200 | -3.41136900 | 0.55242000  |
| C  | 0.17394000  | -3.94688300 | 1.84162200  |
| C  | 0.06302500  | -5.31909600 | 2.07946500  |
| H  | -0.65684800 | -6.37385100 | -1.05187400 |
| H  | 0.20266400  | -5.70766900 | 3.09325800  |
| C  | 0.50538200  | -3.02177400 | 2.98078400  |
| H  | 0.50266300  | -3.52987800 | 3.95590700  |
| H  | 1.50440200  | -2.57752300 | 2.83813100  |
| H  | -0.20592700 | -2.17993000 | 3.03355400  |
| C  | -0.43650200 | -7.67282500 | 1.32905800  |
| H  | 0.17568800  | -8.00868200 | 2.17673800  |
| H  | -1.48439100 | -7.90056200 | 1.58146200  |
| H  | -0.17547500 | -8.28998400 | 0.45892200  |
| C  | -0.43707100 | -3.81322600 | -1.89225400 |
| H  | -0.81658500 | -4.58189400 | -2.58162400 |
| H  | -1.12082900 | -2.94686100 | -1.93909400 |
| H  | 0.53428900  | -3.46445000 | -2.27944400 |
| Cu | 0.09653000  | -1.48514300 | 0.20569100  |
| C  | 6.72123800  | -2.66000300 | 0.17542400  |
| H  | 7.74920500  | -2.66975500 | 0.56685000  |
| H  | 6.06317000  | -2.26099700 | 0.95982900  |
| H  | 6.42204300  | -3.70082700 | -0.00648400 |
| C  | 7.67182300  | -2.32950900 | -2.11768000 |
| H  | 8.68074800  | -2.15491500 | -1.71750100 |

|   |             |             |             |
|---|-------------|-------------|-------------|
| H | 7.58800300  | -3.40010700 | -2.32055600 |
| H | 7.59123200  | -1.79956400 | -3.07517400 |
| C | 7.10696500  | -0.38390200 | -0.75002400 |
| H | 7.02699400  | 0.28155800  | -1.62113300 |
| H | 6.53523600  | 0.06724000  | 0.07162400  |
| H | 8.15939700  | -0.40307200 | -0.43360400 |
| C | 1.55435200  | -2.08634000 | -4.99569400 |
| H | 0.75372200  | -2.46472500 | -4.34307600 |
| H | 1.53720600  | -0.98715600 | -4.96101100 |
| H | 1.30746700  | -2.38684200 | -6.02317200 |
| C | 2.82901400  | -4.17728700 | -4.72663300 |
| H | 2.35566500  | -4.45009500 | -5.68083700 |
| H | 3.81173700  | -4.65796800 | -4.70092000 |
| H | 2.21017600  | -4.59389400 | -3.91888700 |
| C | 3.92207200  | -2.12888700 | -5.67382800 |
| H | 4.93519500  | -2.50381700 | -5.49503100 |
| H | 3.60802600  | -2.45089200 | -6.67749700 |
| H | 3.95087600  | -1.02982600 | -5.66727500 |
| C | 6.41496000  | 3.23453500  | 0.12061000  |
| H | 5.93250900  | 2.74059800  | -0.73429100 |
| H | 6.97560900  | 4.09945200  | -0.26244100 |
| H | 7.14210900  | 2.52731500  | 0.54498300  |
| C | 6.10615300  | 4.48157800  | 2.25923100  |
| H | 6.95323300  | 3.94858700  | 2.70059600  |
| H | 6.50231300  | 5.40617400  | 1.81545800  |
| H | 5.42673700  | 4.76337400  | 3.07358000  |
| C | 4.43107300  | 4.69515300  | 0.49087700  |
| H | 3.85525100  | 4.27306100  | -0.34112100 |
| H | 3.70763500  | 5.09495600  | 1.21361900  |
| H | 5.01090000  | 5.54043300  | 0.09480200  |
| C | 4.61918300  | -0.16852000 | 5.42216200  |
| H | 5.50852500  | 0.46101600  | 5.52266700  |
| H | 4.36679900  | -0.54041300 | 6.42557700  |
| H | 4.86912200  | -1.03987700 | 4.79935500  |
| C | 3.20881600  | 1.89279100  | 5.64885800  |
| H | 2.31673600  | 2.42929500  | 5.29294100  |
| H | 3.05149000  | 1.64924200  | 6.70975000  |
| H | 4.07165400  | 2.56525800  | 5.57786000  |
| C | 2.18614200  | -0.27445000 | 5.05321900  |
| H | 1.27221300  | 0.19336000  | 4.65685400  |
| H | 2.29260900  | -1.26590700 | 4.59007600  |
| H | 2.03897100  | -0.43255300 | 6.13018400  |
| C | -3.54893800 | -5.17672400 | 2.00173900  |
| H | -3.53220200 | -6.22677600 | 1.67114800  |

|   |             |             |             |
|---|-------------|-------------|-------------|
| H | -2.52206900 | -4.79269700 | 1.93031900  |
| H | -3.83844300 | -5.16649400 | 3.06111100  |
| C | -4.07167100 | -4.55794200 | -0.34106200 |
| H | -4.65489900 | -3.91711100 | -1.01740700 |
| H | -3.00432500 | -4.36070700 | -0.49695000 |
| H | -4.23845500 | -5.60370300 | -0.63477500 |
| C | -5.92513000 | -4.96245100 | 1.20338900  |
| H | -6.31110100 | -5.07028300 | 2.22039200  |
| H | -6.64482800 | -4.35596400 | 0.63713100  |
| H | -5.90608600 | -5.96652500 | 0.75702500  |
| C | -6.68606000 | -0.24313700 | 4.44748600  |
| H | -7.38120800 | 0.48454300  | 4.89036600  |
| H | -7.12034300 | -1.23548200 | 4.59293200  |
| H | -5.74186500 | -0.18344600 | 5.00821300  |
| C | -6.20599500 | 1.59426200  | 2.89474700  |
| H | -5.30630900 | 1.88536600  | 3.45670100  |
| H | -6.10004600 | 1.95426100  | 1.86173700  |
| H | -7.05785100 | 2.12892700  | 3.33548500  |
| C | -7.76667700 | -0.18574000 | 2.18523100  |
| H | -8.03699500 | -1.24705800 | 2.21658800  |
| H | -8.59643600 | 0.39531600  | 2.61458600  |
| H | -7.65428300 | 0.11213700  | 1.13275000  |
| C | -5.46401000 | 4.80491500  | -2.52104700 |
| H | -5.88251000 | 4.44126700  | -3.46045900 |
| H | -6.16574200 | 5.54202700  | -2.10637000 |
| H | -4.53500000 | 5.33901200  | -2.76590800 |
| C | -4.77140000 | 4.44981600  | -0.20101200 |
| H | -4.79216400 | 3.81978800  | 0.69716700  |
| H | -3.75476500 | 4.85510300  | -0.29823100 |
| H | -5.45607100 | 5.28660000  | -0.00893200 |
| C | -6.54805700 | 3.00611900  | -1.14443800 |
| H | -6.98732400 | 2.50761500  | -2.01725900 |
| H | -6.39748900 | 2.23618700  | -0.37343100 |
| H | -7.28288700 | 3.73138100  | -0.76503000 |
| C | -1.90672700 | 2.38167900  | -5.55099700 |
| H | -1.52827300 | 2.19961900  | -6.56779700 |
| H | -2.73567000 | 3.09323400  | -5.61725900 |
| H | -1.09777700 | 2.84908500  | -4.97059100 |
| C | -1.12367800 | 0.12963100  | -4.91738000 |
| H | -0.29638800 | 0.53328100  | -4.31387900 |
| H | -1.35982500 | -0.88027900 | -4.54984600 |
| H | -0.75916600 | 0.02284800  | -5.94836600 |
| C | -3.40455700 | 0.38533900  | -5.80095500 |
| H | -4.21971400 | 1.06775500  | -6.05554100 |

|   |             |             |             |
|---|-------------|-------------|-------------|
| H | -2.94573600 | 0.05972100  | -6.74554500 |
| H | -3.82788900 | -0.50380500 | -5.31189600 |

**TS1**

|   |             |             |             |
|---|-------------|-------------|-------------|
| P | 1.73225800  | 0.33458600  | 0.22970200  |
| C | 0.97747400  | 0.91568200  | 1.81206600  |
| C | 2.92205400  | 1.63057700  | -0.28444700 |
| C | 2.89406100  | -0.93222000 | 0.89951000  |
| C | 0.02375700  | 0.04543400  | 2.41152200  |
| C | 1.30135800  | 2.12788000  | 2.42097300  |
| C | 2.54134300  | 2.96167200  | -0.48084600 |
| C | 4.18590000  | 1.24419400  | -0.70850800 |
| C | 3.62994700  | -0.61185100 | 2.04012600  |
| C | 3.10075400  | -2.15913300 | 0.28346300  |
| C | -0.23428400 | -1.32217300 | 1.88975400  |
| C | -0.56471100 | 0.49492900  | 3.57290300  |
| C | 0.69748300  | 2.55322800  | 3.61461400  |
| H | 2.06093300  | 2.76672000  | 1.97212700  |
| C | 3.35104400  | 3.87127200  | -1.15816000 |
| H | 1.56783200  | 3.28605200  | -0.11938800 |
| C | 5.05207800  | 2.09899400  | -1.39808800 |
| H | 4.50916000  | 0.22228300  | -0.51908600 |
| C | 4.63705000  | -1.43523400 | 2.52465900  |
| H | 3.40265000  | 0.32095400  | 2.54979000  |
| C | 4.10857100  | -3.04382300 | 0.71198600  |
| H | 2.45569000  | -2.42721600 | -0.55509400 |
| C | -0.97153300 | -1.62824500 | 0.71352400  |
| C | 0.39586700  | -2.38814100 | 2.50231600  |
| C | -0.24742800 | 1.71583800  | 4.15720700  |
| H | 0.96131400  | 3.49678000  | 4.08675300  |
| C | 4.55960700  | 3.37878200  | -1.70969400 |
| C | 4.92947400  | -2.59816400 | 1.76985000  |
| P | -1.73397100 | -0.26798200 | -0.24201100 |
| C | -0.93153700 | -2.91729100 | 0.17396100  |
| C | 0.36138100  | -3.68020600 | 1.99472500  |
| C | -3.30669400 | -0.89803500 | -0.95233300 |
| C | -2.55571700 | 0.79578500  | 1.01124900  |
| C | -0.28121800 | -3.97731500 | 0.81694200  |
| H | -1.37733000 | -3.10483000 | -0.80296800 |
| C | -3.87596000 | -2.15695200 | -0.79510600 |
| C | -4.05432200 | 0.09021300  | -1.57760300 |
| C | -3.57744700 | 0.26238800  | 1.78076400  |
| C | -2.31264000 | 2.16291100  | 1.06324400  |
| H | -0.26101200 | -4.97804700 | 0.39152100  |

|   |             |             |             |
|---|-------------|-------------|-------------|
| C | -5.10257800 | -2.48506200 | -1.37452600 |
| H | -3.35372100 | -2.89989100 | -0.20355300 |
| C | -5.32387900 | -0.13711400 | -2.10495900 |
| H | -3.63475200 | 1.09739300  | -1.63082000 |
| C | -4.45126600 | 1.05223800  | 2.52704200  |
| H | -3.73212600 | -0.81430400 | 1.74968400  |
| C | -3.11057100 | 3.01733500  | 1.82666900  |
| H | -1.47450900 | 2.55409700  | 0.48828600  |
| C | -5.77046700 | -1.47360800 | -2.10170000 |
| C | -4.23765200 | 2.44710400  | 2.47007100  |
| C | -1.97077200 | 0.86373500  | 5.22908600  |
| H | -2.90785800 | 1.30258900  | 4.83931700  |
| H | -2.11524100 | 0.42165300  | 6.21997100  |
| O | -1.51372500 | -0.13117400 | 4.32579000  |
| O | -0.97681100 | 1.87304600  | 5.29755200  |
| H | 1.80336700  | -4.02229700 | 4.67845500  |
| C | 1.81431400  | -3.62861800 | 3.65663300  |
| H | 2.84763800  | -3.51738300 | 3.27903600  |
| O | 1.09145400  | -4.50318300 | 2.80250600  |
| O | 1.16548400  | -2.36600600 | 3.62907800  |
| O | 5.25353000  | 4.20021300  | -2.56902700 |
| O | 6.05117400  | -3.30641500 | 2.13907000  |
| O | -5.12916300 | 3.31324900  | 3.06563700  |
| O | -6.88665200 | -1.82725900 | -2.82772700 |
| C | 7.17290700  | -3.05803600 | 1.31723600  |
| H | 8.03662800  | -3.51963500 | 1.80836500  |
| H | 7.05509200  | -3.50019500 | 0.31771500  |
| H | 7.35555300  | -1.97862100 | 1.20013300  |
| C | 4.22283400  | -4.41961100 | 0.02272000  |
| C | 5.32868600  | -1.11460300 | 3.85833100  |
| C | 6.45791800  | 1.54118600  | -1.69121900 |
| C | 5.04324700  | 3.87491500  | -3.93001500 |
| H | 5.58579200  | 4.62002100  | -4.52168300 |
| H | 5.42703800  | 2.87311100  | -4.17704200 |
| H | 3.97528100  | 3.90628300  | -4.19569200 |
| C | 2.96473900  | 5.35661700  | -1.23641800 |
| C | -5.58397200 | 0.31067300  | 3.26105900  |
| C | -2.72080600 | 4.49379100  | 2.00273500  |
| C | -6.26076500 | 3.61618700  | 2.27453000  |
| H | -7.02466800 | 2.82683000  | 2.33277200  |
| H | -6.69155400 | 4.54457700  | 2.66654000  |
| H | -5.98643400 | 3.76152900  | 1.21894400  |
| C | -5.71682700 | -3.87376200 | -1.14398800 |
| C | -6.09797900 | 1.10671300  | -2.57489300 |

|    |             |             |             |
|----|-------------|-------------|-------------|
| C  | -6.60629600 | -1.95567800 | -4.20721700 |
| H  | -7.53768500 | -2.25935800 | -4.69738400 |
| H  | -6.26012500 | -1.00698300 | -4.64464900 |
| H  | -5.83179900 | -2.71713500 | -4.38798700 |
| C  | 0.09930200  | -3.85739900 | -3.29525200 |
| C  | 1.33961100  | -3.22937700 | -3.15208800 |
| C  | 1.44753000  | -1.83766700 | -3.14824100 |
| C  | 0.30786100  | -1.01060000 | -3.29204600 |
| C  | -0.91234000 | -1.66423200 | -3.58752500 |
| C  | -1.01690500 | -3.05757900 | -3.54127100 |
| H  | 2.23589700  | -3.84892200 | -3.03751300 |
| H  | -1.99194200 | -3.53195500 | -3.70046000 |
| C  | -2.09331500 | -0.85373600 | -4.04022300 |
| H  | -1.98825300 | -0.61164700 | -5.10990200 |
| H  | -3.04940600 | -1.38441000 | -3.91548400 |
| H  | -2.15095800 | 0.10445400  | -3.50645100 |
| C  | -0.01453700 | -5.35086100 | -3.21306100 |
| H  | -1.06370600 | -5.67482000 | -3.21891900 |
| H  | 0.48843400  | -5.84736000 | -4.05549500 |
| H  | 0.45276700  | -5.73987900 | -2.29568900 |
| C  | 2.80419100  | -1.18966900 | -3.07970400 |
| H  | 3.54617100  | -1.79933800 | -2.54498300 |
| H  | 3.19727200  | -1.01571500 | -4.09414000 |
| H  | 2.75597200  | -0.20766500 | -2.58745400 |
| Cu | 0.08135400  | 0.27551400  | -1.65249900 |
| C  | 0.91326200  | 1.44805100  | -4.61080400 |
| C  | 2.15674900  | 1.43348300  | -5.39441300 |
| C  | 2.26819300  | 1.26699700  | -6.71592800 |
| H  | 3.07601900  | 1.52272500  | -4.79796800 |
| H  | 3.23601200  | 1.21522100  | -7.21044400 |
| H  | 1.38721800  | 1.17188000  | -7.35204100 |
| C  | 0.91611800  | 2.19356800  | -3.37470800 |
| H  | 1.90058700  | 2.44308600  | -2.95934700 |
| C  | -0.16537100 | 2.36802200  | -2.55808200 |
| H  | -1.18221600 | 2.22743800  | -2.93498900 |
| H  | -0.07710100 | 2.93970500  | -1.63181300 |
| H  | 0.69087200  | 0.29383100  | -4.07788700 |
| H  | 0.00018800  | 1.55568900  | -5.21436200 |
| C  | -5.88559900 | -4.66250100 | -2.44908600 |
| H  | -6.16088600 | -5.70202800 | -2.21970900 |
| H  | -6.67515000 | -4.24836100 | -3.08291100 |
| H  | -4.94620700 | -4.68606700 | -3.02166500 |
| C  | -7.08005200 | -3.71572500 | -0.45762400 |
| H  | -7.76988600 | -3.11943100 | -1.06439500 |

|   |             |             |             |
|---|-------------|-------------|-------------|
| H | -7.53446100 | -4.70330200 | -0.28954000 |
| H | -6.96522200 | -3.22804000 | 0.52166000  |
| C | -4.84081600 | -4.72925500 | -0.22337200 |
| H | -3.85368000 | -4.93921700 | -0.66279300 |
| H | -4.68890200 | -4.26217300 | 0.76017800  |
| H | -5.33597400 | -5.69482800 | -0.05401600 |
| C | -5.39121400 | 1.73976500  | -3.77973100 |
| H | -5.92970700 | 2.64182400  | -4.10446300 |
| H | -4.35815900 | 2.03275900  | -3.54729100 |
| H | -5.34993900 | 1.04659700  | -4.63227200 |
| C | -7.57080700 | 0.87822400  | -2.93040400 |
| H | -8.04581500 | 1.85874400  | -3.07887300 |
| H | -7.71436000 | 0.31097000  | -3.85557000 |
| H | -8.10873200 | 0.36026600  | -2.12736900 |
| C | -6.11022100 | 2.11487400  | -1.40664600 |
| H | -6.63730400 | 1.68718600  | -0.54070100 |
| H | -5.10856900 | 2.41187000  | -1.06588100 |
| H | -6.64168600 | 3.02881800  | -1.71018200 |
| C | 2.81521400  | -4.99969100 | -0.19713900 |
| H | 2.30568300  | -5.15552200 | 0.76456200  |
| H | 2.17525700  | -4.37393500 | -0.83116000 |
| H | 2.90307400  | -5.97623900 | -0.69562200 |
| C | 4.89625100  | -4.27545900 | -1.34763600 |
| H | 4.98872500  | -5.25995300 | -1.82929700 |
| H | 4.30916700  | -3.63232400 | -2.01636000 |
| H | 5.90309600  | -3.84253900 | -1.27741300 |
| C | 4.96416300  | -5.48179500 | 0.84662800  |
| H | 4.79974400  | -6.46213600 | 0.37762600  |
| H | 6.04496900  | -5.32887000 | 0.90470300  |
| H | 4.57581000  | -5.53264400 | 1.87319100  |
| C | 6.82803000  | -0.83436200 | 3.69952100  |
| H | 7.23249400  | -0.44592700 | 4.64534900  |
| H | 7.39376000  | -1.73648200 | 3.44725200  |
| H | 7.00985300  | -0.07436900 | 2.92480300  |
| C | 4.70712800  | 0.11872900  | 4.52047700  |
| H | 4.88690100  | 1.03649900  | 3.94278400  |
| H | 3.62250400  | 0.00701200  | 4.66608300  |
| H | 5.16248700  | 0.26074700  | 5.50990700  |
| C | 5.12388800  | -2.28837600 | 4.82626900  |
| H | 5.64557200  | -2.08849100 | 5.77371700  |
| H | 4.05523900  | -2.40848700 | 5.05834500  |
| H | 5.50729200  | -3.22954500 | 4.41615400  |
| C | 7.04795800  | 1.01866400  | -0.36672200 |
| H | 7.14638300  | 1.83404000  | 0.36368100  |

|   |             |             |             |
|---|-------------|-------------|-------------|
| H | 6.44448700  | 0.22676500  | 0.09662600  |
| H | 8.04978900  | 0.60257800  | -0.54744300 |
| C | 6.35963500  | 0.37194400  | -2.68042200 |
| H | 7.36333600  | -0.01809100 | -2.90459900 |
| H | 5.76072700  | -0.45960000 | -2.28050800 |
| H | 5.89898900  | 0.68219600  | -3.62952500 |
| C | 7.47812500  | 2.55467100  | -2.22049500 |
| H | 7.28377600  | 2.87184100  | -3.24946400 |
| H | 7.52683400  | 3.45199500  | -1.59248700 |
| H | 8.47074100  | 2.08197400  | -2.21460800 |
| C | 4.10067000  | 6.19655000  | -0.63499300 |
| H | 5.03840600  | 6.06153300  | -1.18386900 |
| H | 3.83365800  | 7.26300800  | -0.66695300 |
| H | 4.27061500  | 5.92385300  | 0.41641900  |
| C | 1.70675900  | 5.65068900  | -0.41453400 |
| H | 0.81366200  | 5.15643000  | -0.82455600 |
| H | 1.81781500  | 5.35115600  | 0.63815700  |
| H | 1.51328700  | 6.73180200  | -0.42919400 |
| C | 2.68117500  | 5.82404300  | -2.66940500 |
| H | 2.26398400  | 6.84116100  | -2.64682700 |
| H | 3.58976600  | 5.85792600  | -3.27864300 |
| H | 1.94460200  | 5.17306300  | -3.16291800 |
| C | -1.39652100 | 4.81181800  | 1.29855600  |
| H | -0.56948900 | 4.17931800  | 1.65467900  |
| H | -1.47165900 | 4.70694000  | 0.20567100  |
| H | -1.12349000 | 5.85591000  | 1.50543800  |
| C | -3.76271800 | 5.46238700  | 1.42851100  |
| H | -4.02920000 | 5.19235000  | 0.39554100  |
| H | -4.67532200 | 5.49772800  | 2.03021100  |
| H | -3.34747100 | 6.48010500  | 1.40830600  |
| C | -2.51820000 | 4.77733300  | 3.49822500  |
| H | -3.43347900 | 4.59694000  | 4.07248800  |
| H | -1.72062800 | 4.14186500  | 3.90999300  |
| H | -2.22318400 | 5.82701600  | 3.64415600  |
| C | -6.18016000 | 1.06714000  | 4.45373500  |
| H | -6.70410900 | 1.98536700  | 4.18155100  |
| H | -6.90063600 | 0.41390400  | 4.96536000  |
| H | -5.40326800 | 1.34008500  | 5.18175400  |
| C | -6.68514800 | -0.03215900 | 2.24527300  |
| H | -6.26537900 | -0.56675200 | 1.37803500  |
| H | -7.44787000 | -0.67528500 | 2.70949700  |
| H | -7.19226800 | 0.86367000  | 1.86349800  |
| C | -5.06066200 | -1.02438300 | 3.82789200  |
| H | -4.86191000 | -1.77158300 | 3.04853400  |



|          |             |             |             |
|----------|-------------|-------------|-------------|
| H        | -4.13532100 | -0.89485500 | 4.40641100  |
| H        | -5.82058900 | -1.45989200 | 4.49046000  |
| <b>B</b> |             |             |             |
| P        | 1.79433400  | 0.28162600  | 0.12140400  |
| C        | 1.02579900  | 0.46791800  | 1.77342600  |
| C        | 2.97318200  | 1.65846800  | -0.13791600 |
| C        | 2.95258400  | -1.11306400 | 0.35975100  |
| C        | 0.04614000  | -0.50570500 | 2.12911700  |
| C        | 1.25325000  | 1.58352000  | 2.57501600  |
| C        | 2.50808300  | 2.96723300  | -0.29956200 |
| C        | 4.29903600  | 1.38819100  | -0.43866000 |
| C        | 3.70928700  | -1.21125200 | 1.53005700  |
| C        | 3.21563600  | -1.97246000 | -0.69574000 |
| C        | -0.13670700 | -1.77646500 | 1.37078700  |
| C        | -0.67708600 | -0.23313100 | 3.26913600  |
| C        | 0.51798200  | 1.81877900  | 3.74688900  |
| H        | 2.01263700  | 2.30545500  | 2.27401700  |
| C        | 3.31283500  | 3.97037600  | -0.83290700 |
| H        | 1.47026000  | 3.18321800  | -0.04887400 |
| C        | 5.16769900  | 2.34588000  | -0.97232800 |
| H        | 4.67722600  | 0.38256300  | -0.28060900 |
| C        | 4.81575400  | -2.05283700 | 1.61657600  |
| H        | 3.43147800  | -0.58316400 | 2.37485800  |
| C        | 4.29314700  | -2.87298400 | -0.66410800 |
| H        | 2.57046300  | -1.92825200 | -1.57662400 |
| C        | -0.91481500 | -1.93141700 | 0.19049400  |
| C        | 0.57566500  | -2.89384100 | 1.76338400  |
| C        | -0.45598700 | 0.89920100  | 4.05031600  |
| H        | 0.69533800  | 2.68832900  | 4.37541800  |
| C        | 4.61440800  | 3.60292900  | -1.26169100 |
| C        | 5.15122500  | -2.78861800 | 0.45015200  |
| P        | -1.66814800 | -0.46440600 | -0.58919300 |
| C        | -0.87820100 | -3.12527700 | -0.53438800 |
| C        | 0.56561300  | -4.09108300 | 1.05482400  |
| C        | -3.14695600 | -1.02784600 | -1.51482800 |
| C        | -2.60556700 | 0.43513900  | 0.70859400  |
| C        | -0.14509500 | -4.23927600 | -0.11022500 |
| H        | -1.40967000 | -3.18903800 | -1.48243900 |
| C        | -3.86011200 | -2.20177600 | -1.27883900 |
| C        | -3.76871900 | 0.00363700  | -2.20586500 |
| C        | -3.70729100 | -0.14489600 | 1.31831200  |
| C        | -2.32915200 | 1.77568200  | 0.94308900  |
| H        | -0.11844200 | -5.16304600 | -0.68237900 |

|   |             |             |             |
|---|-------------|-------------|-------------|
| C | -5.13377600 | -2.40623700 | -1.80879500 |
| H | -3.41355500 | -2.96442200 | -0.64831300 |
| C | -5.09215000 | -0.07744400 | -2.64195400 |
| H | -3.22517100 | 0.94398100  | -2.31849900 |
| C | -4.61572500 | 0.58807700  | 2.08352700  |
| H | -3.89199000 | -1.20277100 | 1.14511800  |
| C | -3.16348600 | 2.56668900  | 1.73401400  |
| H | -1.44229600 | 2.19562700  | 0.46944700  |
| C | -5.70806900 | -1.34157800 | -2.54368100 |
| C | -4.35217200 | 1.97059900  | 2.22196900  |
| C | -2.27690200 | -0.09469800 | 4.77523100  |
| H | -3.15489700 | 0.39881100  | 4.31611100  |
| H | -2.55222300 | -0.66234800 | 5.66944800  |
| O | -1.68550400 | -0.96621300 | 3.82236300  |
| O | -1.31260600 | 0.88847900  | 5.11069400  |
| H | 2.25251600  | -4.76903800 | 3.53317000  |
| C | 2.12444000  | -4.22079900 | 2.59420700  |
| H | 3.09719900  | -3.96894700 | 2.13259100  |
| O | 1.36527500  | -4.99788900 | 1.68437200  |
| O | 1.40314900  | -3.02261000 | 2.84162700  |
| O | 5.32904100  | 4.52238600  | -1.99773400 |
| O | 6.36549300  | -3.43721500 | 0.44577800  |
| O | -5.24208600 | 2.79219300  | 2.87956700  |
| O | -6.91889200 | -1.56601100 | -3.15877300 |
| C | 7.35288300  | -2.75840500 | -0.30385800 |
| H | 8.29421000  | -3.29758100 | -0.15180200 |
| H | 7.11892600  | -2.74095900 | -1.37892900 |
| H | 7.47148800  | -1.71731500 | 0.03721000  |
| C | 4.40723000  | -3.87504400 | -1.82777000 |
| C | 5.60732500  | -2.18248200 | 2.93099500  |
| C | 6.63017900  | 1.89784000  | -1.14973100 |
| C | 5.28510700  | 4.25623100  | -3.38591800 |
| H | 5.78144100  | 5.09415600  | -3.88771000 |
| H | 5.81045400  | 3.32413000  | -3.64420000 |
| H | 4.24912400  | 4.17532900  | -3.74774500 |
| C | 2.81074600  | 5.42060700  | -0.90083900 |
| C | -5.84620100 | -0.16936800 | 2.61772500  |
| C | -2.74853300 | 4.00233900  | 2.08964600  |
| C | -6.32882800 | 3.25892500  | 2.10726800  |
| H | -7.16388200 | 2.54382100  | 2.09998600  |
| H | -6.68025200 | 4.19007200  | 2.56665600  |
| H | -6.02925000 | 3.46296400  | 1.06875100  |
| C | -5.89820300 | -3.70487000 | -1.50712600 |
| C | -5.76480600 | 1.25152700  | -3.03460400 |

|    |             |             |             |
|----|-------------|-------------|-------------|
| C  | -6.80651600 | -1.72760400 | -4.55801200 |
| H  | -7.81349900 | -1.93299000 | -4.93683900 |
| H  | -6.41701700 | -0.82302700 | -5.04831800 |
| H  | -6.14273700 | -2.56787900 | -4.81127700 |
| Cu | 0.11019100  | 0.63057800  | -1.46174800 |
| C  | 0.61036600  | 0.17105800  | -3.71460500 |
| C  | 1.65299800  | -0.77074000 | -4.02063000 |
| C  | 1.51345800  | -1.99271900 | -4.57328000 |
| H  | 2.66649800  | -0.42745000 | -3.76104700 |
| H  | 2.36940900  | -2.62913600 | -4.78979300 |
| H  | 0.53157600  | -2.37679800 | -4.85383900 |
| C  | 0.88122800  | 1.45607500  | -3.21838300 |
| H  | 1.94241100  | 1.69523100  | -3.05631100 |
| C  | -0.05570900 | 2.38849300  | -2.72154900 |
| H  | -1.09695400 | 2.33437700  | -3.05102000 |
| H  | 0.29180800  | 3.37272200  | -2.40841400 |
| H  | -0.41647600 | -0.08051400 | -4.00531500 |
| C  | -6.22989300 | -4.48616500 | -2.78537700 |
| H  | -6.60400500 | -5.48577300 | -2.52174600 |
| H  | -7.00698400 | -3.99341000 | -3.37694600 |
| H  | -5.33666200 | -4.61926100 | -3.41255400 |
| C  | -7.19642500 | -3.38378800 | -0.75355400 |
| H  | -7.83875200 | -2.70157400 | -1.32044700 |
| H  | -7.75844900 | -4.31102200 | -0.56793700 |
| H  | -6.97931900 | -2.92604000 | 0.22322100  |
| C  | -5.08104100 | -4.64149800 | -0.61245600 |
| H  | -4.14646200 | -4.96883700 | -1.09064200 |
| H  | -4.83018200 | -4.18135500 | 0.35425700  |
| H  | -5.67480100 | -5.54006400 | -0.39810800 |
| C  | -5.14721500 | 1.81500200  | -4.31806700 |
| H  | -5.58082800 | 2.79949300  | -4.54559400 |
| H  | -4.05962400 | 1.94113700  | -4.23016600 |
| H  | -5.33648200 | 1.16001600  | -5.17999400 |
| C  | -7.28742500 | 1.19389400  | -3.19229800 |
| H  | -7.66232900 | 2.22103700  | -3.30636800 |
| H  | -7.61734300 | 0.63409400  | -4.07242900 |
| H  | -7.76927100 | 0.75445700  | -2.30948600 |
| C  | -5.51125500 | 2.24211700  | -1.87646400 |
| H  | -5.89841600 | 1.83338000  | -0.92963400 |
| H  | -4.44888400 | 2.47229000  | -1.72370800 |
| H  | -6.02702300 | 3.19209600  | -2.07869700 |
| C  | 3.01511700  | -4.49742900 | -2.04843600 |
| H  | 2.65137200  | -4.96661500 | -1.12157100 |
| H  | 2.26559200  | -3.77074500 | -2.38756800 |

|   |            |             |             |
|---|------------|-------------|-------------|
| H | 3.08135100 | -5.27471000 | -2.82285500 |
| C | 4.82781700 | -3.14922600 | -3.11113400 |
| H | 4.81354100 | -3.84581700 | -3.96253100 |
| H | 4.14556700 | -2.32065900 | -3.34506200 |
| H | 5.84408500 | -2.73708400 | -3.03583700 |
| C | 5.35397300 | -5.05361600 | -1.57699200 |
| H | 5.22273600 | -5.78284700 | -2.38893000 |
| H | 6.41189500 | -4.77656600 | -1.56110400 |
| H | 5.12474300 | -5.56079500 | -0.63075300 |
| C | 7.01694400 | -1.58852400 | 2.81879900  |
| H | 7.48722100 | -1.57077700 | 3.81275100  |
| H | 7.66208000 | -2.18178300 | 2.16250200  |
| H | 6.98834600 | -0.55383900 | 2.44796900  |
| C | 4.89395200 | -1.45130400 | 4.07143600  |
| H | 4.88480600 | -0.36216100 | 3.92698200  |
| H | 3.85548500 | -1.79248500 | 4.19172100  |
| H | 5.42387900 | -1.65065400 | 5.01271000  |
| C | 5.72687700 | -3.65518300 | 3.34984400  |
| H | 6.35286600 | -3.72889300 | 4.25097000  |
| H | 4.74500400 | -4.07793100 | 3.60361900  |
| H | 6.18185600 | -4.26951300 | 2.56676100  |
| C | 7.10848300 | 1.31443700  | 0.19333400  |
| H | 7.06555100 | 2.07349100  | 0.98705100  |
| H | 6.51047500 | 0.45400500  | 0.52162700  |
| H | 8.15152200 | 0.97546400  | 0.10379800  |
| C | 6.71055600 | 0.79572400  | -2.21559500 |
| H | 7.74432800 | 0.42828500  | -2.30466400 |
| H | 6.06835400 | -0.06293100 | -1.96652700 |
| H | 6.39887800 | 1.16405700  | -3.20306600 |
| C | 7.63046000 | 3.00546500  | -1.49425500 |
| H | 7.51481000 | 3.40246700  | -2.50705600 |
| H | 7.56206800 | 3.84562100  | -0.79275900 |
| H | 8.64593800 | 2.58941100  | -1.42630000 |
| C | 3.78508000 | 6.32600200  | -0.13448000 |
| H | 4.79135500 | 6.29566900  | -0.56513000 |
| H | 3.43022500 | 7.36673700  | -0.16344200 |
| H | 3.84796400 | 6.02191800  | 0.92007400  |
| C | 1.44134900 | 5.56455300  | -0.23301600 |
| H | 0.65483500 | 5.01819000  | -0.77376700 |
| H | 1.44981200 | 5.21577600  | 0.80979500  |
| H | 1.15546000 | 6.62522700  | -0.22443000 |
| C | 2.65854200 | 5.92708500  | -2.34038500 |
| H | 2.13347600 | 6.89319800  | -2.33719700 |
| H | 3.62652600 | 6.08361800  | -2.82583300 |

|   |             |             |             |
|---|-------------|-------------|-------------|
| H | 2.06444900  | 5.22693000  | -2.94687100 |
| C | -1.37888000 | 4.34510700  | 1.49496800  |
| H | -0.59460600 | 3.64941400  | 1.82589100  |
| H | -1.39416100 | 4.34424800  | 0.39444700  |
| H | -1.08970200 | 5.35425700  | 1.81965700  |
| C | -3.72595500 | 5.05841400  | 1.55742900  |
| H | -3.94567700 | 4.89334300  | 0.49198600  |
| H | -4.66735000 | 5.07560200  | 2.11321400  |
| H | -3.27664900 | 6.05725700  | 1.65352000  |
| C | -2.63650700 | 4.12238500  | 3.61628700  |
| H | -3.60107500 | 3.93988400  | 4.10321600  |
| H | -1.90849800 | 3.39941400  | 4.01334500  |
| H | -2.29700300 | 5.13240300  | 3.88993700  |
| C | -6.44515300 | 0.42007800  | 3.90030000  |
| H | -6.87503900 | 1.41550800  | 3.77498400  |
| H | -7.24331900 | -0.24380300 | 4.26074700  |
| H | -5.68838300 | 0.49139700  | 4.69447900  |
| C | -6.90295100 | -0.22675700 | 1.50348300  |
| H | -6.48061500 | -0.68584700 | 0.59512600  |
| H | -7.76643000 | -0.83115000 | 1.82110400  |
| H | -7.27480500 | 0.76703000  | 1.22408200  |
| C | -5.47787100 | -1.62555400 | 2.95929700  |
| H | -5.26231000 | -2.23374700 | 2.07049900  |
| H | -4.60608700 | -1.68717000 | 3.62605500  |
| H | -6.32695800 | -2.10438100 | 3.46523800  |

**A'**

|   |             |             |             |
|---|-------------|-------------|-------------|
| C | -2.34944500 | -1.77631800 | -1.60300200 |
| C | -0.09223600 | -1.19882500 | -3.05073500 |
| C | -1.11660400 | -2.11964600 | -3.70927800 |
| C | -2.46785800 | -1.71971300 | -3.13555300 |
| H | -2.32528300 | -2.83874400 | -1.30293400 |
| H | -0.26302200 | -0.17882300 | -3.43436600 |
| H | -1.07946300 | -2.04366300 | -4.80570500 |
| H | -0.91642600 | -3.17260200 | -3.45216000 |
| H | -2.71495800 | -0.68856800 | -3.43841100 |
| H | -3.29108800 | -2.35953100 | -3.48404100 |
| C | 1.36856200  | -1.50800700 | -3.18351700 |
| C | 2.29551500  | -0.47771300 | -2.97750000 |
| C | 1.85567900  | -2.79162300 | -3.44270700 |
| C | 3.66252000  | -0.72429200 | -3.00460000 |
| H | 1.92605100  | 0.53383500  | -2.78930000 |
| C | 3.22584800  | -3.04031500 | -3.47658000 |
| H | 1.16110500  | -3.61066300 | -3.62829700 |

|   |             |             |             |
|---|-------------|-------------|-------------|
| C | 4.13428000  | -2.01198700 | -3.25052600 |
| H | 4.36273900  | 0.09235200  | -2.83132100 |
| H | 3.58366400  | -4.04786900 | -3.68377100 |
| H | 5.20452100  | -2.20917300 | -3.27505900 |
| C | -3.48975200 | -1.10288900 | -0.88735500 |
| C | -4.60572900 | -1.86081000 | -0.52095700 |
| C | -3.48995000 | 0.26650800  | -0.60916500 |
| C | -5.69049400 | -1.27175900 | 0.12019400  |
| H | -4.61336500 | -2.93216500 | -0.73376200 |
| C | -4.56748400 | 0.85625400  | 0.04530500  |
| H | -2.62767000 | 0.88692900  | -0.86771900 |
| C | -5.67005800 | 0.08968400  | 0.41320300  |
| H | -6.55058100 | -1.87887800 | 0.40018500  |
| H | -4.52752900 | 1.92201900  | 0.27178900  |
| H | -6.51156000 | 0.55209900  | 0.92682800  |
| P | -0.63435700 | -1.08422700 | -1.23660900 |
| C | 0.90442700  | -1.26685100 | 2.94710400  |
| C | 3.24586300  | -0.49101200 | 1.76037400  |
| C | 3.26457800  | -0.78750500 | 3.26806900  |
| C | 2.18374900  | -1.82218400 | 3.56299400  |
| H | 0.64615800  | -0.33677800 | 3.48192700  |
| H | 3.76198600  | -1.31876500 | 1.24252700  |
| H | 4.25821900  | -1.12044900 | 3.59880300  |
| H | 3.03363800  | 0.13651500  | 3.82171800  |
| H | 2.45417600  | -2.78269500 | 3.09512200  |
| H | 2.07015000  | -2.00983600 | 4.64038200  |
| C | 3.87530900  | 0.80806200  | 1.32155200  |
| C | 4.75550700  | 1.51919400  | 2.13765400  |
| C | 3.61086400  | 1.31045300  | 0.04300500  |
| C | 5.34736300  | 2.69846000  | 1.69069000  |
| H | 4.99123800  | 1.15475000  | 3.13677400  |
| C | 4.20153300  | 2.48225800  | -0.40900000 |
| H | 2.91913900  | 0.77056400  | -0.60736700 |
| C | 5.07385400  | 3.18519000  | 0.41818100  |
| H | 6.02636300  | 3.24046300  | 2.34723400  |
| H | 3.96976400  | 2.85247600  | -1.40793700 |
| H | 5.53249100  | 4.11000800  | 0.07285900  |
| C | -0.32817200 | -2.11644500 | 2.85620700  |
| C | -1.53765200 | -1.48221800 | 2.54405400  |
| C | -0.31803600 | -3.50519200 | 2.98779200  |
| C | -2.70027800 | -2.21184300 | 2.34089100  |
| H | -1.55666300 | -0.39489400 | 2.44539600  |
| C | -1.48556500 | -4.24177100 | 2.78657100  |
| H | 0.60553600  | -4.02362000 | 3.24600200  |

|    |             |             |             |
|----|-------------|-------------|-------------|
| C  | -2.67448300 | -3.60157100 | 2.45234600  |
| H  | -3.62436000 | -1.69237100 | 2.08615900  |
| H  | -1.46071400 | -5.32554800 | 2.89222800  |
| H  | -3.58298300 | -4.17952800 | 2.28805500  |
| P  | 1.43676000  | -0.66359600 | 1.25148200  |
| C  | 0.17709100  | -2.56499200 | -0.44471200 |
| C  | 1.50580700  | -2.22052800 | 0.22409100  |
| H  | 0.31552800  | -3.37875600 | -1.17281300 |
| H  | -0.54197900 | -2.92533300 | 0.30600600  |
| H  | 1.86364500  | -3.06690800 | 0.83129000  |
| H  | 2.27642300  | -2.02753900 | -0.54169700 |
| Cu | 0.03889200  | 0.86351600  | 0.23547800  |
| C  | -2.38656600 | 4.33424100  | 0.84988600  |
| C  | -1.72761700 | 3.11350100  | 1.03579900  |
| C  | -0.83560500 | 2.60932500  | 0.07158300  |
| C  | -0.64704200 | 3.39473000  | -1.08384100 |
| C  | -1.30586600 | 4.61253200  | -1.25640100 |
| C  | -2.18926700 | 5.10154000  | -0.29456200 |
| H  | -3.06858200 | 4.70341600  | 1.62239900  |
| H  | -1.12580900 | 5.20301700  | -2.16035300 |
| C  | -2.01781600 | 2.32774300  | 2.28559600  |
| H  | -1.09072800 | 1.92353000  | 2.72065500  |
| H  | -2.51789200 | 2.93437800  | 3.05379300  |
| H  | -2.67875600 | 1.46975700  | 2.06951500  |
| C  | 0.28426500  | 2.91107600  | -2.16274900 |
| H  | 1.28183700  | 2.68840900  | -1.75040300 |
| H  | -0.09136600 | 1.97692800  | -2.61522400 |
| H  | 0.40782700  | 3.64367000  | -2.97276000 |
| C  | -2.90539800 | 6.40466500  | -0.49803300 |
| H  | -2.23019900 | 7.18069100  | -0.88452700 |
| H  | -3.72739300 | 6.31081600  | -1.22329000 |
| H  | -3.33960300 | 6.77602400  | 0.43941200  |

**TS1'**

|   |             |             |            |
|---|-------------|-------------|------------|
| C | -3.02414900 | -0.75870000 | 1.82264400 |
| C | -0.45216600 | -0.94403700 | 2.76785300 |
| C | -1.58573800 | -1.32065100 | 3.72459100 |
| C | -2.73556100 | -1.83667400 | 2.87719300 |
| H | -3.44259000 | 0.11776800  | 2.34811100 |
| H | 0.00654900  | -1.87207800 | 2.39210500 |
| H | -1.24169500 | -2.05253600 | 4.46931700 |
| H | -1.93420500 | -0.43803400 | 4.28385200 |
| H | -2.45267200 | -2.77596000 | 2.37438900 |
| H | -3.63901000 | -2.05096800 | 3.46630500 |

|   |             |             |             |
|---|-------------|-------------|-------------|
| C | 0.65421600  | -0.08849300 | 3.31821700  |
| C | 1.93854500  | -0.20579500 | 2.77188100  |
| C | 0.46092400  | 0.82966400  | 4.35520000  |
| C | 2.99324100  | 0.55886700  | 3.25704800  |
| H | 2.11078800  | -0.91499700 | 1.96130200  |
| C | 1.51373900  | 1.60898200  | 4.82861200  |
| H | -0.51994800 | 0.93776100  | 4.81759900  |
| C | 2.78617500  | 1.47654900  | 4.28390900  |
| H | 3.98764300  | 0.42726600  | 2.82776200  |
| H | 1.33709700  | 2.31626000  | 5.63781200  |
| H | 3.61217500  | 2.07628300  | 4.66239000  |
| C | -4.01401800 | -1.19595900 | 0.77943500  |
| C | -5.36474000 | -0.87817300 | 0.94432000  |
| C | -3.64444400 | -1.96067600 | -0.32904600 |
| C | -6.31833900 | -1.29915100 | 0.02308500  |
| H | -5.66707000 | -0.28163000 | 1.80739900  |
| C | -4.59064300 | -2.37161400 | -1.26208100 |
| H | -2.59513900 | -2.22178000 | -0.47461900 |
| C | -5.93244500 | -2.04114900 | -1.09010200 |
| H | -7.36587400 | -1.03992800 | 0.17109200  |
| H | -4.27317600 | -2.95209100 | -2.12792100 |
| H | -6.67391600 | -2.36414400 | -1.81885600 |
| P | -1.30890400 | -0.22587900 | 1.22692800  |
| C | -0.90532200 | 2.90659800  | -1.79110700 |
| C | 1.70937800  | 3.15110800  | -0.98893500 |
| C | 1.25210900  | 3.96920700  | -2.19546900 |
| C | -0.22543900 | 4.25763400  | -1.99660500 |
| H | -0.88088000 | 2.36911700  | -2.75372200 |
| H | 1.66653200  | 3.81205800  | -0.10495900 |
| H | 1.85065200  | 4.88482600  | -2.30463800 |
| H | 1.38660400  | 3.38174300  | -3.11908500 |
| H | -0.34662700 | 4.89196200  | -1.10455100 |
| H | -0.67223200 | 4.80195200  | -2.84067100 |
| C | 3.09737700  | 2.57451100  | -1.05547200 |
| C | 3.93588000  | 2.76380600  | -2.15502000 |
| C | 3.59722200  | 1.87020700  | 0.04455900  |
| C | 5.23646200  | 2.26455100  | -2.15519600 |
| H | 3.58309900  | 3.31732200  | -3.02376800 |
| C | 4.89216100  | 1.37179600  | 0.04770300  |
| H | 2.96068700  | 1.71785800  | 0.91869600  |
| C | 5.72091900  | 1.56694300  | -1.05491200 |
| H | 5.87415200  | 2.42808900  | -3.02264600 |
| H | 5.25713200  | 0.82207000  | 0.91570400  |
| H | 6.73818000  | 1.17882000  | -1.05378800 |



|    |             |             |             |
|----|-------------|-------------|-------------|
| C  | -2.32081000 | 2.90446100  | -1.29142300 |
| C  | -3.13659500 | 1.79995800  | -1.56297300 |
| C  | -2.85152600 | 3.93943900  | -0.51611700 |
| C  | -4.42272900 | 1.70891500  | -1.04824900 |
| H  | -2.74905200 | 0.99387700  | -2.18508400 |
| C  | -4.14125700 | 3.85181800  | 0.00331900  |
| H  | -2.25548400 | 4.82606800  | -0.30218100 |
| C  | -4.92690000 | 2.73145400  | -0.24778900 |
| H  | -5.02916900 | 0.83174900  | -1.27055700 |
| H  | -4.53146700 | 4.66832900  | 0.60949400  |
| H  | -5.93245500 | 2.65790900  | 0.16462600  |
| P  | 0.29697400  | 1.90416000  | -0.70523800 |
| C  | -1.38557700 | 1.59802200  | 1.58675600  |
| C  | -0.19550200 | 2.37724800  | 1.03352400  |
| H  | -1.47370000 | 1.76488600  | 2.67157300  |
| H  | -2.32099600 | 1.95300100  | 1.13075900  |
| H  | -0.38648300 | 3.46053800  | 1.09339300  |
| H  | 0.69771700  | 2.17693500  | 1.64890100  |
| Cu | 0.05813200  | -0.51080200 | -0.79535700 |
| C  | 3.60916800  | -2.81198500 | 1.02848500  |
| C  | 3.78621400  | -1.96812100 | -0.06651200 |
| C  | 2.72106600  | -1.63489300 | -0.90723700 |
| C  | 1.40789300  | -2.09988800 | -0.64753900 |
| C  | 1.27070300  | -3.04152800 | 0.40447300  |
| C  | 2.34541700  | -3.37519500 | 1.22622600  |
| H  | 4.78094900  | -1.56188200 | -0.27167200 |
| H  | 2.20053300  | -4.08091000 | 2.05020300  |
| C  | -0.03768300 | -3.75525600 | 0.58541900  |
| H  | -0.14441300 | -4.55659000 | -0.16274600 |
| H  | -0.13265500 | -4.22184300 | 1.57715000  |
| H  | -0.88661000 | -3.07356900 | 0.43236200  |
| C  | 4.72559300  | -3.08505000 | 1.99054500  |
| H  | 4.78164400  | -4.14765300 | 2.26294500  |
| H  | 5.69835300  | -2.78907400 | 1.57709200  |
| H  | 4.58044300  | -2.52437800 | 2.92754100  |
| C  | 2.98579400  | -0.83784700 | -2.15126300 |
| H  | 3.99881700  | -0.41547600 | -2.16947500 |
| H  | 2.87408800  | -1.48476900 | -3.03704600 |
| H  | 2.26407500  | -0.01669900 | -2.27264100 |
| C  | 0.11718000  | -3.03451300 | -2.96014000 |
| C  | 0.95341900  | -3.95926300 | -3.73101400 |
| C  | 0.97410800  | -5.28902300 | -3.59722500 |
| H  | 1.64704700  | -3.49263600 | -4.44046800 |
| H  | 1.65770000  | -5.91538700 | -4.16591500 |

|   |             |             |             |
|---|-------------|-------------|-------------|
| H | 0.29763100  | -5.80021700 | -2.90983200 |
| C | -0.16426300 | -1.72121400 | -3.47105700 |
| H | 0.54115900  | -1.33313700 | -4.21564600 |
| C | -1.03810700 | -0.83982200 | -2.90770400 |
| H | -1.86576000 | -1.19008800 | -2.28291600 |
| H | -1.13982300 | 0.16303300  | -3.32386500 |
| H | 0.76023000  | -2.61841100 | -1.90381900 |
| H | -0.73115200 | -3.51399100 | -2.44565200 |

**B'**

|   |             |             |             |
|---|-------------|-------------|-------------|
| C | 2.64463800  | 2.19841500  | 0.20355400  |
| C | 0.15843700  | 3.12368000  | -0.48977100 |
| C | 1.15798800  | 4.16607600  | -0.00015900 |
| C | 2.53228300  | 3.62154700  | -0.37199500 |
| H | 2.79820700  | 2.28033500  | 1.29311900  |
| H | 0.19461600  | 3.11148100  | -1.59255200 |
| H | 0.96404400  | 5.15544800  | -0.43900800 |
| H | 1.09861700  | 4.28155700  | 1.09433000  |
| H | 2.62699400  | 3.57277400  | -1.46933200 |
| H | 3.35717500  | 4.25107700  | -0.00984300 |
| C | -1.27972500 | 3.18596600  | -0.06855800 |
| C | -2.21874700 | 2.44645500  | -0.80276600 |
| C | -1.71252700 | 3.86280400  | 1.07287200  |
| C | -3.53865600 | 2.34836800  | -0.38254800 |
| H | -1.89334500 | 1.91321700  | -1.70042100 |
| C | -3.04056400 | 3.77556300  | 1.48961300  |
| H | -1.01119800 | 4.46475600  | 1.65111600  |
| C | -3.95311100 | 3.00769200  | 0.77356400  |
| H | -4.24511400 | 1.74920000  | -0.95687100 |
| H | -3.35870600 | 4.31136900  | 2.38308400  |
| H | -4.98773300 | 2.92765100  | 1.10581300  |
| C | 3.76787600  | 1.38754300  | -0.37998700 |
| C | 4.97960000  | 1.28125500  | 0.30512400  |
| C | 3.64081400  | 0.74698500  | -1.61559600 |
| C | 6.03647400  | 0.54506700  | -0.22218100 |
| H | 5.08777900  | 1.77367300  | 1.27348700  |
| C | 4.69126900  | 0.00502600  | -2.14337300 |
| H | 2.69680200  | 0.81571400  | -2.16094900 |
| C | 5.89245800  | -0.10112200 | -1.44633400 |
| H | 6.97300300  | 0.47026100  | 0.32867300  |
| H | 4.56899300  | -0.49431800 | -3.10436300 |
| H | 6.71351800  | -0.68595600 | -1.85733700 |
| P | 0.92191900  | 1.46306500  | -0.01809900 |
| C | -0.30190800 | -2.45783200 | 1.44355500  |

|    |             |             |             |
|----|-------------|-------------|-------------|
| C  | -2.86394200 | -1.49634900 | 1.19222000  |
| C  | -2.68196600 | -2.97982700 | 1.55212800  |
| C  | -1.37258900 | -3.09591000 | 2.32444300  |
| H  | -0.14408900 | -3.10944700 | 0.56740400  |
| H  | -3.10736700 | -0.95380900 | 2.12195800  |
| H  | -3.54747100 | -3.35060400 | 2.11846700  |
| H  | -2.62490400 | -3.57709900 | 0.62683000  |
| H  | -1.47001300 | -2.54945300 | 3.27685800  |
| H  | -1.12059800 | -4.13610900 | 2.57488700  |
| C  | -3.92964200 | -1.20505300 | 0.17558200  |
| C  | -3.74152300 | -1.49718600 | -1.17876100 |
| C  | -5.13885900 | -0.63169800 | 0.57200100  |
| C  | -4.73344500 | -1.21641800 | -2.11080300 |
| H  | -2.79172700 | -1.92114500 | -1.51103000 |
| C  | -6.13802400 | -0.35417900 | -0.35670500 |
| H  | -5.29401200 | -0.39176800 | 1.62542700  |
| C  | -5.93599900 | -0.64282100 | -1.70290000 |
| H  | -4.56159000 | -1.44044700 | -3.16280500 |
| H  | -7.07468100 | 0.09342600  | -0.02678800 |
| H  | -6.71224700 | -0.42240700 | -2.43386800 |
| C  | 1.04037200  | -2.11321200 | 2.01641400  |
| C  | 2.11348100  | -1.94973200 | 1.13002800  |
| C  | 1.25022400  | -1.85755400 | 3.37322000  |
| C  | 3.34927300  | -1.50462500 | 1.58104100  |
| H  | 1.97250900  | -2.18175400 | 0.07208600  |
| C  | 2.49170400  | -1.41495200 | 3.82744400  |
| H  | 0.44086200  | -1.99990000 | 4.08997300  |
| C  | 3.53977300  | -1.22179300 | 2.93239400  |
| H  | 4.16535100  | -1.37808800 | 0.86994600  |
| H  | 2.63737000  | -1.22055500 | 4.88940900  |
| H  | 4.50754500  | -0.86854600 | 3.28709700  |
| P  | -1.13517900 | -0.93524600 | 0.70244600  |
| C  | 0.42911300  | 1.20784200  | 1.75902500  |
| C  | -0.87782900 | 0.43874500  | 1.93297800  |
| H  | 0.38004400  | 2.16990000  | 2.29272800  |
| H  | 1.26171800  | 0.63962200  | 2.20134000  |
| H  | -0.96372700 | 0.05251300  | 2.96055300  |
| H  | -1.73784200 | 1.10816000  | 1.76828000  |
| Cu | -0.20467000 | -0.15964900 | -1.26722500 |
| C  | 0.71569100  | -2.50208400 | -2.51404000 |
| C  | 1.96769600  | -3.16607200 | -2.28988400 |
| C  | 2.14093200  | -4.38881600 | -1.75224800 |
| H  | 2.85937700  | -2.58861000 | -2.56735900 |
| H  | 3.12824600  | -4.81934100 | -1.60454700 |

|   |             |             |             |
|---|-------------|-------------|-------------|
| H | 1.28715100  | -5.00225600 | -1.45906300 |
| C | 0.60910900  | -1.25628900 | -3.09287400 |
| H | 1.56041000  | -0.78420800 | -3.37590200 |
| C | -0.56985400 | -0.45312800 | -3.24928100 |
| H | -1.52622700 | -0.98160000 | -3.32680200 |
| H | -0.49266400 | 0.40910300  | -3.91338500 |
| H | -0.20251000 | -3.03556500 | -2.23494400 |

**(Z)-(R)-TS2**

|   |             |             |             |
|---|-------------|-------------|-------------|
| P | -1.69552100 | -0.86331700 | 0.13170200  |
| C | -0.91241000 | -2.29373400 | 0.96971400  |
| C | -2.92970200 | -1.56053900 | -1.01690500 |
| C | -2.67345200 | -0.05355200 | 1.44030300  |
| C | 0.15490600  | -2.00852400 | 1.86724500  |
| C | -1.22289400 | -3.60911800 | 0.62798600  |
| C | -2.49556900 | -2.38391500 | -2.05107300 |
| C | -4.24420000 | -1.09749300 | -1.04398600 |
| C | -3.58940700 | -0.74151900 | 2.22385800  |
| C | -2.44790100 | 1.29995800  | 1.67891400  |
| C | 0.43560200  | -0.67090500 | 2.46839400  |
| C | 0.87076800  | -3.10418600 | 2.30593900  |
| C | -0.48894800 | -4.70343100 | 1.10550900  |
| H | -2.05781700 | -3.80155900 | -0.04336800 |
| C | -3.31409800 | -2.74054300 | -3.12511400 |
| H | -1.46950800 | -2.75453400 | -2.03171100 |
| C | -5.08502300 | -1.33126000 | -2.13096400 |
| H | -4.59658500 | -0.49321100 | -0.21250500 |
| C | -4.37743600 | -0.09784400 | 3.18407500  |
| H | -3.69748200 | -1.81535800 | 2.06760300  |
| C | -3.19510200 | 2.00972700  | 2.61575800  |
| H | -1.66708300 | 1.79493600  | 1.10046400  |
| C | 1.29532300  | 0.33685700  | 1.94426300  |
| C | -0.12490900 | -0.40032700 | 3.70102700  |
| C | 0.57116400  | -4.41032600 | 1.92663500  |
| H | -0.73615100 | -5.72706400 | 0.83375500  |
| C | -4.56270700 | -2.09020600 | -3.20352300 |
| C | -4.22887300 | 1.30432400  | 3.27839000  |
| P | 1.79744500  | 0.19162600  | 0.17824600  |
| C | 1.57442300  | 1.47999100  | 2.69233500  |
| C | 0.14550500  | 0.75806400  | 4.42293800  |
| C | 2.98824300  | 1.54921300  | -0.09885400 |
| C | 2.82658000  | -1.31417300 | 0.18047400  |
| C | 1.01391100  | 1.71216200  | 3.95663200  |
| H | 2.24171200  | 2.23367500  | 2.27827900  |

|   |             |             |             |
|---|-------------|-------------|-------------|
| C | 4.31198600  | 1.34155500  | -0.45773300 |
| C | 2.49583500  | 2.85388800  | -0.08418300 |
| C | 3.90419700  | -1.46585500 | 1.04211900  |
| C | 2.51194700  | -2.34385200 | -0.70094000 |
| H | 1.24099500  | 2.60746200  | 4.53081000  |
| C | 5.18925700  | 2.39104200  | -0.75147000 |
| H | 4.66319900  | 0.31932200  | -0.55309500 |
| C | 3.33030300  | 3.95442700  | -0.27086000 |
| H | 1.42990400  | 2.99911400  | 0.08559600  |
| C | 4.76965700  | -2.56241200 | 0.97032100  |
| H | 4.08493100  | -0.68170200 | 1.77780000  |
| C | 3.30864800  | -3.48082800 | -0.81239700 |
| H | 1.60778300  | -2.23466400 | -1.29798600 |
| C | 4.69180600  | 3.70132400  | -0.57294700 |
| C | 4.50043400  | -3.50464700 | -0.04689700 |
| C | 2.47395000  | -4.43117900 | 3.02357700  |
| H | 3.30644100  | -4.40582000 | 2.29246100  |
| H | 2.80684500  | -4.79649600 | 4.00041000  |
| O | 1.93528600  | -3.12555500 | 3.16081200  |
| O | 1.44318200  | -5.26793300 | 2.52791000  |
| H | -1.57522900 | -0.87976100 | 6.37265600  |
| C | -1.47918400 | -0.32212900 | 5.43543900  |
| H | -2.45159900 | 0.10089400  | 5.11305700  |
| O | -0.54202100 | 0.72785300  | 5.60121600  |
| O | -0.98468300 | -1.18098700 | 4.41970700  |
| O | -5.30763900 | -2.16192000 | -4.35825700 |
| O | -5.09922800 | 2.04011900  | 4.05090300  |
| O | 5.40784500  | -4.50407600 | -0.31952500 |
| O | 5.49680000  | 4.80265700  | -0.76790700 |
| C | -6.32440100 | 2.30945100  | 3.40138700  |
| H | -6.86931100 | 3.02237800  | 4.02965200  |
| H | -6.16300000 | 2.75059300  | 2.40627800  |
| H | -6.93447800 | 1.40199200  | 3.28133100  |
| C | -2.83942200 | 3.46590000  | 2.95148700  |
| C | -5.30535000 | -0.98051000 | 4.04347900  |
| C | -6.53620000 | -0.82632500 | -2.10536600 |
| C | -4.81461900 | -1.30119000 | -5.36819000 |
| H | -5.53536100 | -1.32995500 | -6.19258200 |
| H | -4.71884200 | -0.26801700 | -4.99965900 |
| H | -3.83048000 | -1.62357500 | -5.74021500 |
| C | -2.77189900 | -3.81727600 | -4.08364300 |
| C | 5.92012700  | -2.61924300 | 1.99640100  |
| C | 2.86352100  | -4.66642800 | -1.68200700 |
| C | 6.47160500  | -4.07083000 | -1.14378400 |

|    |             |             |             |
|----|-------------|-------------|-------------|
| H  | 7.15328600  | -3.39102300 | -0.61046500 |
| H  | 7.02857500  | -4.96504700 | -1.44430100 |
| H  | 6.10010200  | -3.55265300 | -2.04029400 |
| C  | 6.60059000  | 2.02635600  | -1.25656600 |
| C  | 2.74422200  | 5.37301200  | -0.18624000 |
| C  | 6.44320600  | 5.12293000  | 0.22630000  |
| H  | 6.41459300  | 6.20650000  | 0.39773400  |
| H  | 6.22343700  | 4.61027200  | 1.17405200  |
| H  | 7.46055700  | 4.86256000  | -0.09905600 |
| Cu | -0.15155300 | 0.37870900  | -1.12853300 |
| C  | -1.67220500 | 2.83337200  | -1.92322500 |
| O  | -0.66437700 | 2.41272100  | -1.29699200 |
| C  | -1.61662400 | 4.18498400  | -2.54035500 |
| C  | -2.76660300 | 4.94960100  | -2.76522600 |
| C  | -0.37260700 | 4.73654200  | -2.87552100 |
| C  | -2.67578000 | 6.22432500  | -3.31549100 |
| H  | -3.74586300 | 4.55427300  | -2.49975400 |
| C  | -0.28280800 | 6.00313000  | -3.43092500 |
| H  | 0.52100000  | 4.13654900  | -2.69520600 |
| C  | -1.43637500 | 6.75456700  | -3.65461100 |
| H  | -3.58208300 | 6.80586000  | -3.47936900 |
| H  | 0.69274400  | 6.41077000  | -3.69421500 |
| H  | -1.36522300 | 7.74965300  | -4.09103300 |
| C  | -3.02404300 | 2.22466300  | -1.64520300 |
| H  | -3.43409600 | 2.63495200  | -0.70504500 |
| H  | -3.75229500 | 2.39854500  | -2.44498200 |
| H  | -2.91230800 | 1.14457100  | -1.51118600 |
| C  | 1.26208300  | 5.34292700  | 0.20333400  |
| H  | 0.63892100  | 4.77012500  | -0.49502000 |
| H  | 1.12173700  | 4.92113200  | 1.21093100  |
| H  | 0.87435000  | 6.37089700  | 0.21503300  |
| C  | 3.44457600  | 6.21757100  | 0.88727300  |
| H  | 3.51706700  | 5.66932500  | 1.83841800  |
| H  | 4.44690600  | 6.53153800  | 0.58765200  |
| H  | 2.86258500  | 7.13124500  | 1.07489100  |
| C  | 2.86923500  | 6.06497800  | -1.54850400 |
| H  | 2.40219600  | 7.06088400  | -1.51142800 |
| H  | 3.91740300  | 6.18090100  | -1.84381800 |
| H  | 2.35633600  | 5.48180600  | -2.32565700 |
| C  | 7.08478900  | 2.97930500  | -2.35682300 |
| H  | 7.20105000  | 4.01233400  | -2.02256900 |
| H  | 8.05453900  | 2.63249500  | -2.74087100 |
| H  | 6.37428900  | 2.98614800  | -3.19535800 |
| C  | 6.61297800  | 0.62276500  | -1.88904700 |

|   |             |             |             |
|---|-------------|-------------|-------------|
| H | 6.46132900  | -0.18291600 | -1.15559000 |
| H | 5.85001200  | 0.51815700  | -2.67190900 |
| H | 7.59560500  | 0.45086800  | -2.34924700 |
| C | 7.60467100  | 1.97582400  | -0.09655300 |
| H | 7.26838100  | 1.26418800  | 0.67045300  |
| H | 8.58463600  | 1.63479000  | -0.46229400 |
| H | 7.75271400  | 2.94272800  | 0.39366300  |
| C | 5.37938500  | -2.27613400 | 3.39665200  |
| H | 4.92730200  | -1.28036900 | 3.46176900  |
| H | 4.62333700  | -2.99941300 | 3.72740300  |
| H | 6.20593800  | -2.30319300 | 4.11986200  |
| C | 6.60048300  | -3.98583500 | 2.14225700  |
| H | 7.21222400  | -4.26884600 | 1.28165100  |
| H | 7.26674200  | -3.95348000 | 3.01603200  |
| H | 5.86945800  | -4.78824200 | 2.30664600  |
| C | 6.97229000  | -1.56170400 | 1.63785800  |
| H | 7.42539100  | -1.74167300 | 0.65264000  |
| H | 6.52534300  | -0.55680700 | 1.61707200  |
| H | 7.78124600  | -1.55658900 | 2.38287500  |
| C | 2.81587700  | -5.93365400 | -0.81681500 |
| H | 2.11146600  | -5.81168300 | 0.01909200  |
| H | 2.47608600  | -6.78744700 | -1.42128700 |
| H | 3.80111200  | -6.17760900 | -0.40474700 |
| C | 1.45410500  | -4.44878100 | -2.24666300 |
| H | 0.70769400  | -4.28712800 | -1.45205000 |
| H | 1.41211300  | -3.60161800 | -2.94805600 |
| H | 1.15232700  | -5.34567200 | -2.80615400 |
| C | 3.78964200  | -4.89285700 | -2.88351400 |
| H | 3.93009300  | -3.96239700 | -3.45336800 |
| H | 4.76961500  | -5.27505500 | -2.58245300 |
| H | 3.34337100  | -5.63410400 | -3.56188200 |
| C | -2.27963000 | -5.00271500 | -3.23081600 |
| H | -1.45977500 | -4.73718700 | -2.55099900 |
| H | -3.09994800 | -5.41676900 | -2.62716400 |
| H | -1.90588500 | -5.80088500 | -3.88787300 |
| C | -3.80737100 | -4.40927100 | -5.04625600 |
| H | -4.70543200 | -4.74908400 | -4.51516800 |
| H | -4.12471000 | -3.71743400 | -5.83176100 |
| H | -3.35954300 | -5.28061000 | -5.54478800 |
| C | -1.58570400 | -3.27518300 | -4.89047600 |
| H | -0.76255100 | -2.94533400 | -4.24075500 |
| H | -1.19209400 | -4.05942700 | -5.55364600 |
| H | -1.86850800 | -2.41682000 | -5.51553200 |
| C | -7.48637100 | -2.02595600 | -2.21832200 |

|   |             |             |             |
|---|-------------|-------------|-------------|
| H | -8.53114200 | -1.68380100 | -2.18132400 |
| H | -7.33823200 | -2.56845800 | -3.15788900 |
| H | -7.33073600 | -2.72561300 | -1.38495600 |
| C | -6.83621700 | 0.17145300  | -3.23124700 |
| H | -6.85876300 | -0.30792100 | -4.21410100 |
| H | -7.82302400 | 0.62781000  | -3.06625700 |
| H | -6.09370500 | 0.98275800  | -3.25037400 |
| C | -6.85635200 | -0.11129400 | -0.78829600 |
| H | -6.69389900 | -0.75587200 | 0.08713200  |
| H | -6.25925100 | 0.80366300  | -0.65774500 |
| H | -7.91466500 | 0.18222000  | -0.78907500 |
| C | -4.53627100 | -2.23741800 | 4.49158400  |
| H | -4.21549600 | -2.87313900 | 3.65877100  |
| H | -3.63960700 | -1.97735600 | 5.07056200  |
| H | -5.18386300 | -2.85149000 | 5.13238200  |
| C | -5.80598700 | -0.32453200 | 5.33653800  |
| H | -6.53093600 | 0.47809200  | 5.17583900  |
| H | -6.30025100 | -1.09214200 | 5.94869400  |
| H | -4.97686700 | 0.09172000  | 5.92459400  |
| C | -6.50645300 | -1.44321800 | 3.20841300  |
| H | -7.12662700 | -0.60098200 | 2.87236700  |
| H | -6.18229900 | -1.99305700 | 2.31289900  |
| H | -7.14657600 | -2.11260400 | 3.80152600  |
| C | -2.55588700 | 3.57307600  | 4.45733900  |
| H | -1.73321500 | 2.90452300  | 4.75005900  |
| H | -2.26109400 | 4.60214600  | 4.71003300  |
| H | -3.43705200 | 3.31299700  | 5.05459500  |
| C | -3.95057400 | 4.45030200  | 2.56629700  |
| H | -4.83568900 | 4.34736400  | 3.20139900  |
| H | -3.58417800 | 5.48051300  | 2.68034800  |
| H | -4.24987300 | 4.32137700  | 1.51537400  |
| C | -1.57141300 | 3.91589300  | 2.21548900  |
| H | -0.70613600 | 3.27766700  | 2.45058600  |
| H | -1.69152900 | 3.93677900  | 1.12159600  |
| H | -1.32405800 | 4.93876000  | 2.53225600  |
| C | 0.09117500  | 0.00616600  | -3.22116400 |
| C | -1.15752600 | 0.51157400  | -3.66402800 |
| C | -1.46312100 | 1.78762700  | -4.08287800 |
| H | 0.16635000  | -1.08860400 | -3.16827300 |
| H | -1.99665800 | -0.18881900 | -3.56000800 |
| H | -0.67942800 | 2.47834500  | -4.38961900 |
| H | -2.45755700 | 2.00786800  | -4.47168800 |
| C | 1.35160200  | 0.70434300  | -3.42961100 |
| C | 2.57379000  | 0.14662600  | -3.49093500 |



|   |            |             |             |
|---|------------|-------------|-------------|
| H | 1.28290800 | 1.79528300  | -3.49993300 |
| H | 3.46882100 | 0.75457800  | -3.61058700 |
| H | 2.71680000 | -0.93463500 | -3.41114000 |

**(E)-(R)-TS2**

|   |             |             |             |
|---|-------------|-------------|-------------|
| P | -1.58902800 | -0.90145100 | 0.05625600  |
| C | -0.73758100 | -2.28439400 | 0.90701900  |
| C | -2.82515500 | -1.66856700 | -1.04497400 |
| C | -2.55655500 | -0.12651800 | 1.39602200  |
| C | 0.28920300  | -1.94437500 | 1.83098800  |
| C | -1.00227100 | -3.61781900 | 0.59693100  |
| C | -2.39087400 | -2.47319700 | -2.09447400 |
| C | -4.16473100 | -1.28670000 | -1.00972000 |
| C | -3.40208600 | -0.85871700 | 2.21870800  |
| C | -2.40349700 | 1.23967500  | 1.61794900  |
| C | 0.54318700  | -0.58367000 | 2.38909300  |
| C | 1.01005000  | -3.00807200 | 2.33641000  |
| C | -0.26654500 | -4.67761500 | 1.14467700  |
| H | -1.80942100 | -3.85318800 | -0.09462000 |
| C | -3.24339900 | -2.89854900 | -3.11686100 |
| H | -1.34385400 | -2.78356900 | -2.11993500 |
| C | -5.03890600 | -1.57084900 | -2.05718400 |
| H | -4.51109000 | -0.69824000 | -0.16485600 |
| C | -4.19042300 | -0.25411400 | 3.20380100  |
| H | -3.45698900 | -1.93792400 | 2.07364200  |
| C | -3.16495800 | 1.91515700  | 2.56906600  |
| H | -1.68116500 | 1.77986500  | 1.00731800  |
| C | 1.33921100  | 0.44394400  | 1.80629500  |
| C | 0.03301900  | -0.30842300 | 3.64234500  |
| C | 0.75034900  | -4.33297000 | 2.00010000  |
| H | -0.48296000 | -5.71529700 | 0.90150200  |
| C | -4.52770100 | -2.31624400 | -3.14332200 |
| C | -4.12478200 | 1.15567000  | 3.28134900  |
| P | 1.81933200  | 0.24171100  | 0.03754900  |
| C | 1.59545600  | 1.61908200  | 2.51272800  |
| C | 0.28278400  | 0.87717400  | 4.32548300  |
| C | 2.95995500  | 1.62225000  | -0.30724100 |
| C | 2.89949100  | -1.22943900 | 0.12020400  |
| C | 1.08022400  | 1.85969200  | 3.79450400  |
| H | 2.21152800  | 2.38993900  | 2.05311800  |
| C | 4.28405600  | 1.45868900  | -0.68802000 |
| C | 2.41613100  | 2.90702300  | -0.30335400 |
| C | 3.95591800  | -1.28941100 | 1.01837800  |
| C | 2.65052700  | -2.32119700 | -0.70693300 |

|   |             |             |             |
|---|-------------|-------------|-------------|
| H | 1.28911200  | 2.78063900  | 4.33395600  |
| C | 5.10561600  | 2.53880000  | -1.03140800 |
| H | 4.67988300  | 0.44956600  | -0.76080200 |
| C | 3.20628900  | 4.03708600  | -0.49915300 |
| H | 1.34741700  | 3.01032000  | -0.11668500 |
| C | 4.86400600  | -2.35398000 | 1.03417400  |
| H | 4.08925800  | -0.46008300 | 1.71356100  |
| C | 3.49278200  | -3.42945500 | -0.73031100 |
| H | 1.77654600  | -2.27737400 | -1.35216700 |
| C | 4.56700000  | 3.83055200  | -0.83932200 |
| C | 4.66025100  | -3.36332500 | 0.06986100  |
| C | 2.59827200  | -4.27207500 | 3.18763200  |
| H | 3.46873400  | -4.26499700 | 2.50315100  |
| H | 2.88281500  | -4.58735300 | 4.19649400  |
| O | 2.03528900  | -2.97128500 | 3.23648600  |
| O | 1.60898300  | -5.14812800 | 2.67554100  |
| H | -1.29578300 | -0.78127700 | 6.37990800  |
| C | -1.25063800 | -0.24351300 | 5.42758900  |
| H | -2.24641500 | 0.13790900  | 5.12716700  |
| O | -0.34850000 | 0.84372900  | 5.53506200  |
| O | -0.75951800 | -1.10835300 | 4.41574800  |
| O | -5.32292300 | -2.44921700 | -4.25812500 |
| O | -5.00309900 | 1.84666700  | 4.08519900  |
| O | 5.61392300  | -4.34005100 | -0.11807500 |
| O | 5.32934300  | 4.95890000  | -1.04526900 |
| C | -6.27182400 | 2.03750700  | 3.49324300  |
| H | -6.79627300 | 2.78937000  | 4.09314400  |
| H | -6.18067800 | 2.39926400  | 2.45779400  |
| H | -6.86683600 | 1.11177500  | 3.48698500  |
| C | -2.88955300 | 3.39926700  | 2.86140900  |
| C | -5.03128600 | -1.18348300 | 4.10243500  |
| C | -6.50610400 | -1.12231600 | -1.97859100 |
| C | -4.92101600 | -1.59644800 | -5.31402600 |
| H | -5.68426200 | -1.67560600 | -6.09576100 |
| H | -4.84750300 | -0.55153600 | -4.97571900 |
| H | -3.94714300 | -1.89011800 | -5.73365700 |
| C | -2.70762500 | -3.98236700 | -4.07126700 |
| C | 5.99229100  | -2.29588900 | 2.08328000  |
| C | 3.11682900  | -4.67888000 | -1.54182300 |
| C | 6.67378400  | -3.91444800 | -0.95092100 |
| H | 7.31691000  | -3.17401300 | -0.45118900 |
| H | 7.27235300  | -4.80094900 | -1.18785000 |
| H | 6.29662700  | -3.46963500 | -1.88387000 |
| C | 6.50130100  | 2.22355500  | -1.60781200 |

|    |             |            |             |
|----|-------------|------------|-------------|
| C  | 2.57010300  | 5.43195200 | -0.39385600 |
| C  | 6.30180300  | 5.27772800 | -0.07445400 |
| H  | 6.25837200  | 6.35667400 | 0.11966600  |
| H  | 6.11984600  | 4.74331800 | 0.86909000  |
| H  | 7.31284100  | 5.03933900 | -0.43475800 |
| Cu | -0.19294600 | 0.49271500 | -1.21392900 |
| C  | -2.03714000 | 2.82705200 | -1.75573700 |
| C  | -2.12105000 | 4.23494100 | -2.23130600 |
| C  | -3.31928900 | 4.95515900 | -2.20474600 |
| C  | -0.95663400 | 4.89080200 | -2.65132800 |
| C  | -3.35385000 | 6.29240700 | -2.59080900 |
| H  | -4.23572600 | 4.47632000 | -1.86197700 |
| C  | -0.99317900 | 6.21756100 | -3.05011100 |
| H  | -0.02438900 | 4.32222500 | -2.66639400 |
| C  | -2.19428000 | 6.92681100 | -3.01935500 |
| H  | -4.29499400 | 6.83957300 | -2.55463000 |
| H  | -0.08117000 | 6.70672800 | -3.39090800 |
| H  | -2.22167300 | 7.97019600 | -3.32959700 |
| C  | -3.32717300 | 2.08729700 | -1.50181300 |
| H  | -3.71123800 | 2.31852800 | -0.49188900 |
| H  | -4.10544700 | 2.33286300 | -2.23247200 |
| H  | -3.14384600 | 1.00963200 | -1.54529400 |
| C  | 1.13289200  | 5.35187300 | 0.13660600  |
| H  | 0.46337800  | 4.75010800 | -0.49057000 |
| H  | 1.10276800  | 4.93742900 | 1.15731000  |
| H  | 0.70739700  | 6.36452200 | 0.17448800  |
| C  | 3.32951000  | 6.34747600 | 0.57772800  |
| H  | 3.56666500  | 5.82551800 | 1.51675900  |
| H  | 4.25625700  | 6.73506700 | 0.14785700  |
| H  | 2.70310500  | 7.21432700 | 0.83134600  |
| C  | 2.54297600  | 6.07655700 | -1.78438100 |
| H  | 2.07049600  | 7.06921200 | -1.73280300 |
| H  | 3.55462400  | 6.19498400 | -2.18922300 |
| H  | 1.96454300  | 5.45856300 | -2.48561500 |
| C  | 6.92175300  | 3.22181600 | -2.69493500 |
| H  | 7.06032200  | 4.24090600 | -2.32916500 |
| H  | 7.86828600  | 2.89122400 | -3.14508100 |
| H  | 6.16630900  | 3.26212200 | -3.49183400 |
| C  | 6.50639000  | 0.84549900 | -2.29481900 |
| H  | 6.39576600  | 0.00808900 | -1.59117700 |
| H  | 5.71302900  | 0.76420700 | -3.05017000 |
| H  | 7.47112500  | 0.70457700 | -2.80100400 |
| C  | 7.55563800  | 2.15393800 | -0.49521100 |
| H  | 7.28745500  | 1.38194600 | 0.23981900  |

|   |             |             |             |
|---|-------------|-------------|-------------|
| H | 8.53407600  | 1.88517000  | -0.92036500 |
| H | 7.67693700  | 3.09755000  | 0.04641700  |
| C | 5.40286000  | -1.90573700 | 3.45137600  |
| H | 4.89791400  | -0.93366700 | 3.45287600  |
| H | 4.67646400  | -2.64888800 | 3.80451600  |
| H | 6.21211900  | -1.84985400 | 4.19243900  |
| C | 6.74225400  | -3.61197000 | 2.32039300  |
| H | 7.38904600  | -3.90628700 | 1.48982100  |
| H | 7.38522200  | -3.49237700 | 3.20389400  |
| H | 6.05349500  | -4.44403600 | 2.51592800  |
| C | 6.99425200  | -1.20623200 | 1.67853500  |
| H | 7.46941000  | -1.42207200 | 0.71067900  |
| H | 6.49614700  | -0.22933100 | 1.59105300  |
| H | 7.79049800  | -1.11372200 | 2.43169500  |
| C | 3.08464000  | -5.89413500 | -0.60363700 |
| H | 2.35300100  | -5.74837400 | 0.20360000  |
| H | 2.79188900  | -6.79357300 | -1.16518000 |
| H | 4.06444300  | -6.07864100 | -0.14990500 |
| C | 1.71784500  | -4.54490600 | -2.15816500 |
| H | 0.94385600  | -4.36644700 | -1.39529400 |
| H | 1.66107000  | -3.73944500 | -2.90645400 |
| H | 1.46489600  | -5.48302500 | -2.67196000 |
| C | 4.08853700  | -4.95413200 | -2.69611500 |
| H | 4.22762900  | -4.06172300 | -3.32335900 |
| H | 5.06637200  | -5.29074000 | -2.33849700 |
| H | 3.68442200  | -5.75032300 | -3.33772200 |
| C | -2.11603100 | -5.11512900 | -3.21013400 |
| H | -1.26163300 | -4.79367100 | -2.59951400 |
| H | -2.87749400 | -5.53195600 | -2.53545200 |
| H | -1.75859500 | -5.92652200 | -3.85973400 |
| C | -3.76995700 | -4.64919400 | -4.95295000 |
| H | -4.62101900 | -5.00738200 | -4.36028200 |
| H | -4.16128500 | -3.99702200 | -5.73886600 |
| H | -3.31435000 | -5.51761900 | -5.44952000 |
| C | -1.59320300 | -3.42292300 | -4.96136300 |
| H | -0.74787000 | -3.04948200 | -4.36697800 |
| H | -1.20828200 | -4.21103100 | -5.62460700 |
| H | -1.94214200 | -2.59420000 | -5.59284200 |
| C | -7.41581600 | -2.35629700 | -2.03562700 |
| H | -8.47017800 | -2.05024000 | -1.96825400 |
| H | -7.28020300 | -2.91185800 | -2.96961600 |
| H | -7.20616800 | -3.03245500 | -1.19479400 |
| C | -6.88307700 | -0.15559500 | -3.10945800 |
| H | -6.94128600 | -0.65788300 | -4.07949400 |

|   |             |             |             |
|---|-------------|-------------|-------------|
| H | -7.87123600 | 0.28245400  | -2.90746300 |
| H | -6.16124700 | 0.67108400  | -3.18436300 |
| C | -6.79863500 | -0.39612400 | -0.66089200 |
| H | -6.58582800 | -1.02291000 | 0.21653700  |
| H | -6.22369800 | 0.53724000  | -0.56352000 |
| H | -7.86457600 | -0.13388200 | -0.62679200 |
| C | -4.18090500 | -2.40152900 | 4.50923500  |
| H | -3.88668200 | -3.02961500 | 3.66070500  |
| H | -3.26014000 | -2.09817200 | 5.02463100  |
| H | -4.76010000 | -3.03792200 | 5.19217100  |
| C | -5.50472600 | -0.55324900 | 5.41824600  |
| H | -6.28129800 | 0.20542000  | 5.29289200  |
| H | -5.92566700 | -1.34516500 | 6.05361600  |
| H | -4.67509500 | -0.08836600 | 5.96762800  |
| C | -6.24416600 | -1.70630500 | 3.32188400  |
| H | -6.91029300 | -0.89498800 | 2.99921700  |
| H | -5.93065000 | -2.25449300 | 2.42178600  |
| H | -6.83246400 | -2.39409700 | 3.94687800  |
| C | -2.50433900 | 3.54766600  | 4.34035600  |
| H | -1.62304300 | 2.93550800  | 4.58163100  |
| H | -2.25680700 | 4.59687100  | 4.55895200  |
| H | -3.32276900 | 3.24635800  | 5.00345300  |
| C | -4.08880500 | 4.30420300  | 2.55317100  |
| H | -4.91768500 | 4.14941400  | 3.25039900  |
| H | -3.78257700 | 5.35673800  | 2.63719500  |
| H | -4.45209900 | 4.15151100  | 1.52562800  |
| C | -1.71669700 | 3.92321200  | 2.02344400  |
| H | -0.80169500 | 3.33124500  | 2.17099100  |
| H | -1.93423600 | 3.93900700  | 0.94522700  |
| H | -1.49653600 | 4.95662100  | 2.32566600  |
| C | 0.18586200  | 0.66582600  | -3.32221500 |
| C | -1.17439000 | 0.75112900  | -3.69691700 |
| C | -1.84123300 | 1.93006300  | -3.96104200 |
| H | -1.74931500 | -0.18846400 | -3.68667200 |
| H | -1.26469700 | 2.80990800  | -4.24203500 |
| H | -2.87707300 | 1.91373000  | -4.30059100 |
| C | 0.95983400  | -0.55397000 | -3.44930500 |
| C | 2.30167800  | -0.63261900 | -3.52943300 |
| H | 0.37754900  | -1.48553800 | -3.48044900 |
| H | 2.82242300  | -1.58467900 | -3.61802300 |
| H | 2.91796000  | 0.26849800  | -3.50972000 |
| H | 0.76415100  | 1.59744800  | -3.39633500 |
| O | -0.97542000 | 2.46122400  | -1.18205400 |

**(Z)-(R)-C**

|   |             |             |             |
|---|-------------|-------------|-------------|
| P | -1.62246500 | -0.98523400 | 0.15327800  |
| C | -0.78309700 | -2.35013800 | 1.03387100  |
| C | -2.81971200 | -1.75401500 | -0.98589000 |
| C | -2.64360700 | -0.16516400 | 1.41376800  |
| C | 0.26133000  | -1.98452800 | 1.92841000  |
| C | -1.03656900 | -3.68861900 | 0.73774600  |
| C | -2.36519300 | -2.57033100 | -2.01660600 |
| C | -4.14105700 | -1.31338200 | -1.02328400 |
| C | -3.52243800 | -0.85376800 | 2.23793300  |
| C | -2.52434900 | 1.21715600  | 1.52842400  |
| C | 0.47988600  | -0.60655300 | 2.46167600  |
| C | 1.01257100  | -3.03212100 | 2.42175100  |
| C | -0.26737200 | -4.73222700 | 1.27055700  |
| H | -1.85860900 | -3.93833700 | 0.06863600  |
| C | -3.17297300 | -2.93911500 | -3.09601500 |
| H | -1.33443700 | -2.92848000 | -1.98666200 |
| C | -4.97000400 | -1.55247200 | -2.11676000 |
| H | -4.50494700 | -0.70737900 | -0.19916500 |
| C | -4.38685500 | -0.18851900 | 3.11419000  |
| H | -3.54829700 | -1.94253800 | 2.17221500  |
| C | -3.34038600 | 1.94438800  | 2.39122400  |
| H | -1.79331800 | 1.72392100  | 0.89474800  |
| C | 1.27453600  | 0.42403000  | 1.88012600  |
| C | -0.09695500 | -0.30065000 | 3.67915600  |
| C | 0.76635000  | -4.36343400 | 2.09502800  |
| H | -0.47200500 | -5.77556500 | 1.04181400  |
| C | -4.43191000 | -2.30846500 | -3.18309600 |
| C | -4.33893500 | 1.22439300  | 3.09071000  |
| P | 1.79035300  | 0.22900900  | 0.12189900  |
| C | 1.46952900  | 1.62795000  | 2.55638000  |
| C | 0.09732900  | 0.91234000  | 4.33292900  |
| C | 2.93486700  | 1.61354800  | -0.20203500 |
| C | 2.86694600  | -1.24443900 | 0.17705400  |
| C | 0.89429800  | 1.89664000  | 3.80577100  |
| H | 2.07723700  | 2.40327100  | 2.09411900  |
| C | 4.27274000  | 1.44996200  | -0.53046400 |
| C | 2.38660000  | 2.89662700  | -0.23036000 |
| C | 3.94460400  | -1.32860300 | 1.04827900  |
| C | 2.59492300  | -2.31632000 | -0.66835300 |
| H | 1.05463100  | 2.84090100  | 4.32072600  |
| C | 5.11044500  | 2.52796200  | -0.83742300 |
| H | 4.66849700  | 0.44109600  | -0.59253900 |
| C | 3.18622100  | 4.02583200  | -0.40133400 |

|   |             |             |             |
|---|-------------|-------------|-------------|
| H | 1.30750500  | 2.99609700  | -0.10977800 |
| C | 4.84918300  | -2.39612300 | 1.01719200  |
| H | 4.09684800  | -0.51477700 | 1.75798500  |
| C | 3.43107200  | -3.42782600 | -0.73775900 |
| H | 1.68823300  | -2.26420300 | -1.26925200 |
| C | 4.56147400  | 3.82016000  | -0.67778400 |
| C | 4.61905200  | -3.38163800 | 0.03336200  |
| C | 2.65042100  | -4.26735100 | 3.21661200  |
| H | 3.48798200  | -4.24515400 | 2.49130300  |
| H | 2.98670400  | -4.57606500 | 4.21144100  |
| O | 2.06513400  | -2.97721100 | 3.28975900  |
| O | 1.65647800  | -5.16179400 | 2.75047600  |
| H | -1.51467100 | -0.72168000 | 6.37698900  |
| C | -1.45162600 | -0.20862400 | 5.41199500  |
| H | -2.44459900 | 0.14378200  | 5.07308100  |
| O | -0.57715500 | 0.90010100  | 5.51803500  |
| O | -0.91181900 | -1.09019700 | 4.43893500  |
| O | -5.17058700 | -2.39545000 | -4.34129800 |
| O | -5.29021200 | 1.95274400  | 3.77037400  |
| O | 5.56315200  | -4.35663700 | -0.20068500 |
| O | 5.32981700  | 4.94830900  | -0.86419100 |
| C | -6.48966600 | 2.09486900  | 3.03755600  |
| H | -7.14045500 | 2.75935800  | 3.61634800  |
| H | -6.30539200 | 2.53634300  | 2.04639200  |
| H | -6.99995900 | 1.12989200  | 2.89342900  |
| C | -3.06726400 | 3.43900800  | 2.61974500  |
| C | -5.29450900 | -1.06412200 | 4.00218400  |
| C | -6.41786200 | -1.03762600 | -2.10359800 |
| C | -4.69165200 | -1.52910900 | -5.35164400 |
| H | -5.43189600 | -1.53601900 | -6.15910600 |
| H | -4.57250600 | -0.50229200 | -4.97247400 |
| H | -3.72239300 | -1.86197000 | -5.75334100 |
| C | -2.60501200 | -4.00152800 | -4.05526400 |
| C | 6.00251000  | -2.37241200 | 2.04163600  |
| C | 3.03032800  | -4.66387200 | -1.55701400 |
| C | 6.60631300  | -3.91688000 | -1.04730400 |
| H | 7.26430300  | -3.19123500 | -0.54555800 |
| H | 7.19505900  | -4.80062600 | -1.31670900 |
| H | 6.21062100  | -3.44910600 | -1.96118000 |
| C | 6.53589000  | 2.21175000  | -1.33708400 |
| C | 2.55026200  | 5.42236600  | -0.31871500 |
| C | 6.25916700  | 5.29199400  | 0.13906700  |
| H | 6.18458500  | 6.37006500  | 0.32907600  |
| H | 6.05761000  | 4.75525600  | 1.07725600  |

|    |             |             |             |
|----|-------------|-------------|-------------|
| H  | 7.28720200  | 5.07746700  | -0.18662500 |
| Cu | -0.22570200 | 0.48123100  | -1.00721800 |
| C  | -1.75548000 | 2.56552200  | -2.20741000 |
| O  | -0.80952500 | 2.36011100  | -1.23432100 |
| C  | -1.86475700 | 4.06789900  | -2.50505500 |
| C  | -3.05705900 | 4.79199100  | -2.45587300 |
| C  | -0.69727300 | 4.76548200  | -2.83391000 |
| C  | -3.08503700 | 6.15907300  | -2.72819500 |
| H  | -3.98970000 | 4.29291000  | -2.19743600 |
| C  | -0.71832000 | 6.12374300  | -3.11855400 |
| H  | 0.24843000  | 4.21898400  | -2.83688000 |
| C  | -1.91811800 | 6.83076400  | -3.06701300 |
| H  | -4.03086600 | 6.69801800  | -2.67669200 |
| H  | 0.20850500  | 6.63757900  | -3.37500200 |
| H  | -1.93885000 | 7.89716600  | -3.28778800 |
| C  | -3.12334600 | 1.98255800  | -1.82395700 |
| H  | -3.49085600 | 2.42753800  | -0.88699800 |
| H  | -3.88557500 | 2.12822200  | -2.60630600 |
| H  | -3.02544700 | 0.90464200  | -1.65518700 |
| C  | 1.08208500  | 5.34081200  | 0.11515800  |
| H  | 0.45503800  | 4.73255000  | -0.54847200 |
| H  | 0.99005300  | 4.93235800  | 1.13436800  |
| H  | 0.65422800  | 6.35322100  | 0.12223500  |
| C  | 3.25069300  | 6.30939800  | 0.72169700  |
| H  | 3.42600000  | 5.76232700  | 1.66020600  |
| H  | 4.20393500  | 6.70433600  | 0.36222700  |
| H  | 2.61203800  | 7.17247000  | 0.95689800  |
| C  | 2.61996600  | 6.09935300  | -1.69227000 |
| H  | 2.16335400  | 7.09954100  | -1.64221900 |
| H  | 3.65648100  | 6.20710300  | -2.03180300 |
| H  | 2.06776300  | 5.51494700  | -2.44147000 |
| C  | 6.98927500  | 3.17918900  | -2.43799800 |
| H  | 7.06795900  | 4.21585500  | -2.10468000 |
| H  | 7.97140700  | 2.86591900  | -2.81939400 |
| H  | 6.28098600  | 3.16127200  | -3.27826400 |
| C  | 6.59506300  | 0.80941900  | -1.97016900 |
| H  | 6.46792400  | -0.00274000 | -1.23923500 |
| H  | 5.83679000  | 0.68299800  | -2.75549500 |
| H  | 7.58260300  | 0.66884700  | -2.43045400 |
| C  | 7.54302800  | 2.19668000  | -0.17898400 |
| H  | 7.22866000  | 1.48369600  | 0.59584800  |
| H  | 8.53099200  | 1.87913000  | -0.54432300 |
| H  | 7.66687100  | 3.17197900  | 0.30111200  |
| C  | 5.45120700  | -2.00547900 | 3.43166400  |



|   |             |             |             |
|---|-------------|-------------|-------------|
| H | 4.95060100  | -1.03178500 | 3.46426900  |
| H | 4.73343800  | -2.75252600 | 3.79344800  |
| H | 6.28128200  | -1.96547000 | 4.15012600  |
| C | 6.74355800  | -3.70145100 | 2.23072500  |
| H | 7.36639100  | -3.98441300 | 1.37816100  |
| H | 7.40973500  | -3.60841300 | 3.10011600  |
| H | 6.05157800  | -4.53084400 | 2.42575800  |
| C | 7.00776700  | -1.28448600 | 1.64134900  |
| H | 7.46542500  | -1.48196100 | 0.66141700  |
| H | 6.51928500  | -0.30062000 | 1.58521900  |
| H | 7.81764600  | -1.21681700 | 2.38234800  |
| C | 3.01616300  | -5.89112000 | -0.63445900 |
| H | 2.30363400  | -5.75151900 | 0.19100600  |
| H | 2.70613700  | -6.78193000 | -1.20025600 |
| H | 4.00549600  | -6.08540800 | -0.20658700 |
| C | 1.61801700  | -4.51726800 | -2.13726700 |
| H | 0.86219800  | -4.34014500 | -1.35527200 |
| H | 1.55479900  | -3.70640000 | -2.87926400 |
| H | 1.34703900  | -5.44833800 | -2.65467900 |
| C | 3.96972300  | -4.92208700 | -2.74171500 |
| H | 4.09033900  | -4.01833500 | -3.35703300 |
| H | 4.95733500  | -5.26370600 | -2.41839100 |
| H | 3.54716900  | -5.70734500 | -3.38480200 |
| C | -2.08198600 | -5.17811200 | -3.20869500 |
| H | -1.26415800 | -4.89788700 | -2.53232100 |
| H | -2.88951700 | -5.61142900 | -2.60186200 |
| H | -1.69517900 | -5.96632900 | -3.87015900 |
| C | -3.62376100 | -4.61609900 | -5.02146100 |
| H | -4.51167800 | -4.98188800 | -4.49079900 |
| H | -3.96152600 | -3.93017000 | -5.80323800 |
| H | -3.15338800 | -5.47288900 | -5.52447300 |
| C | -1.43184500 | -3.42311600 | -4.85554400 |
| H | -0.62233600 | -3.07836300 | -4.19588000 |
| H | -1.01209300 | -4.18957000 | -5.52347100 |
| H | -1.73682700 | -2.56811200 | -5.47533100 |
| C | -7.37230800 | -2.23505500 | -2.19518200 |
| H | -8.41619900 | -1.88913600 | -2.17291000 |
| H | -7.21822000 | -2.79774300 | -3.12274300 |
| H | -7.22415900 | -2.91719900 | -1.34607800 |
| C | -6.71283900 | -0.06084400 | -3.24968600 |
| H | -6.74540300 | -0.55951600 | -4.22259000 |
| H | -7.69540700 | 0.40585500  | -3.08955900 |
| H | -5.96536400 | 0.74519100  | -3.28743100 |
| C | -6.72999000 | -0.28767500 | -0.80277300 |

|   |             |             |             |
|---|-------------|-------------|-------------|
| H | -6.58618300 | -0.91644600 | 0.08752500  |
| H | -6.11198700 | 0.61686300  | -0.68941100 |
| H | -7.78212800 | 0.02728500  | -0.81564600 |
| C | -4.45352300 | -2.18386800 | 4.64224000  |
| H | -3.93724900 | -2.82111700 | 3.91627100  |
| H | -3.69215600 | -1.77103400 | 5.31809800  |
| H | -5.10802800 | -2.83466100 | 5.23866900  |
| C | -5.96550000 | -0.34147900 | 5.17629500  |
| H | -6.76469000 | 0.34125800  | 4.87446300  |
| H | -6.41837600 | -1.09597700 | 5.83551100  |
| H | -5.24169900 | 0.23279000  | 5.76880800  |
| C | -6.37645900 | -1.72143000 | 3.13496200  |
| H | -7.02660400 | -0.97387600 | 2.65893900  |
| H | -5.93386000 | -2.33327000 | 2.33574500  |
| H | -7.01255100 | -2.37641900 | 3.74834200  |
| C | -2.76038400 | 3.64915500  | 4.11051800  |
| H | -1.89778400 | 3.04133000  | 4.42601800  |
| H | -2.51176300 | 4.70457100  | 4.29589500  |
| H | -3.61569400 | 3.38595100  | 4.74307200  |
| C | -4.23647400 | 4.33922600  | 2.20466400  |
| H | -5.10670000 | 4.21940100  | 2.85768800  |
| H | -3.92527800 | 5.39209800  | 2.26064500  |
| H | -4.53779800 | 4.14283900  | 1.16476700  |
| C | -1.84102800 | 3.90432000  | 1.82534000  |
| H | -0.94092000 | 3.32665400  | 2.08437100  |
| H | -1.96936700 | 3.83119400  | 0.73500200  |
| H | -1.64230500 | 4.95798100  | 2.06741200  |
| C | 0.25761100  | -0.10559400 | -3.28912900 |
| C | -0.98865500 | 0.42894700  | -3.38671700 |
| C | -1.31386200 | 1.87148300  | -3.55639800 |
| H | 0.34203900  | -1.19618500 | -3.21596300 |
| H | -1.82806300 | -0.27561700 | -3.34775000 |
| H | -0.44235500 | 2.41460100  | -3.94236700 |
| H | -2.11781500 | 1.98596400  | -4.30173200 |
| C | 1.52334300  | 0.61143900  | -3.39318300 |
| C | 2.70805000  | 0.00038500  | -3.51702600 |
| H | 1.48344900  | 1.70221900  | -3.35034100 |
| H | 3.63537900  | 0.56449800  | -3.59525500 |
| H | 2.79062900  | -1.08882600 | -3.53371700 |

**(E)-(R)-C**

|   |             |             |             |
|---|-------------|-------------|-------------|
| P | -1.54837400 | -0.97823200 | 0.04108700  |
| C | -0.67906600 | -2.30461900 | 0.95434300  |
| C | -2.74887400 | -1.80048700 | -1.06065300 |

|   |             |             |             |
|---|-------------|-------------|-------------|
| C | -2.57158700 | -0.18630200 | 1.32366800  |
| C | 0.30868600  | -1.89778800 | 1.89355900  |
| C | -0.89084400 | -3.65492200 | 0.67895700  |
| C | -2.28805200 | -2.57464600 | -2.12180000 |
| C | -4.09891200 | -1.45751400 | -1.02652900 |
| C | -3.38859100 | -0.92218600 | 2.17300000  |
| C | -2.52501000 | 1.20068000  | 1.43731400  |
| C | 0.50509100  | -0.50616300 | 2.39851800  |
| C | 1.04715400  | -2.91940900 | 2.45691200  |
| C | -0.14265400 | -4.67083200 | 1.28994800  |
| H | -1.66873500 | -3.93580000 | -0.03006800 |
| C | -3.12232900 | -2.98875700 | -3.16517400 |
| H | -1.23360700 | -2.86388000 | -2.14077300 |
| C | -4.96170000 | -1.74365200 | -2.08138300 |
| H | -4.46367900 | -0.88502300 | -0.17961400 |
| C | -4.26491700 | -0.30848700 | 3.07346400  |
| H | -3.35541800 | -2.01010900 | 2.10945000  |
| C | -3.35678600 | 1.87849700  | 2.32751300  |
| H | -1.85404200 | 1.75152600  | 0.77304300  |
| C | 1.28919300  | 0.51996900  | 1.79568500  |
| C | -0.06250200 | -0.18381200 | 3.61591700  |
| C | 0.83324200  | -4.26345700 | 2.16561600  |
| H | -0.31946700 | -5.72323100 | 1.08049500  |
| C | -4.42232300 | -2.44127700 | -3.18470100 |
| C | -4.29399200 | 1.10533900  | 3.05379500  |
| P | 1.82833600  | 0.27322200  | 0.05220800  |
| C | 1.47912200  | 1.73700700  | 2.44783300  |
| C | 0.11740100  | 1.04557300  | 4.24198400  |
| C | 2.95236300  | 1.66005700  | -0.32447700 |
| C | 2.93394800  | -1.17286900 | 0.20006000  |
| C | 0.90263800  | 2.02690600  | 3.69195900  |
| H | 2.08690400  | 2.50362500  | 1.97219600  |
| C | 4.28292000  | 1.50316400  | -0.68762600 |
| C | 2.38639800  | 2.93526200  | -0.37264100 |
| C | 3.98087400  | -1.17559900 | 1.11163700  |
| C | 2.72018100  | -2.30068400 | -0.58601100 |
| H | 1.05412700  | 2.98351400  | 4.18630700  |
| C | 5.08833400  | 2.58214100  | -1.07143100 |
| H | 4.69659100  | 0.49872200  | -0.71176800 |
| C | 3.16394300  | 4.06931600  | -0.59703200 |
| H | 1.31069100  | 3.02644300  | -0.21820300 |
| C | 4.91112500  | -2.21808600 | 1.18119500  |
| H | 4.08799600  | -0.31657300 | 1.77379400  |
| C | 3.59151500  | -3.38600700 | -0.56308900 |

|    |             |             |             |
|----|-------------|-------------|-------------|
| H  | 1.84251000  | -2.30928700 | -1.22672200 |
| C  | 4.52748000  | 3.87166500  | -0.93169400 |
| C  | 4.74508700  | -3.26578400 | 0.25096700  |
| C  | 2.64748800  | -4.10435900 | 3.39263800  |
| H  | 3.52986500  | -4.10146300 | 2.72343600  |
| H  | 2.92150300  | -4.37015600 | 4.41848000  |
| O  | 2.04985100  | -2.81841000 | 3.37727500  |
| O  | 1.69338700  | -5.02727000 | 2.89898400  |
| H  | -1.46336000 | -0.56465500 | 6.32999000  |
| C  | -1.41142100 | -0.07496900 | 5.35229400  |
| H  | -2.41052500 | 0.25162800  | 5.00661800  |
| O  | -0.55722500 | 1.05306500  | 5.42689200  |
| O  | -0.85622500 | -0.97031000 | 4.40102300  |
| O  | -5.20138300 | -2.55606700 | -4.31403100 |
| O  | -5.25357900 | 1.78817100  | 3.76847700  |
| O  | 5.72067500  | -4.22853200 | 0.11202300  |
| O  | 5.26855400  | 5.00249600  | -1.19125700 |
| C  | -6.49838700 | 1.87497800  | 3.10821500  |
| H  | -7.06878000 | 2.67056200  | 3.60064000  |
| H  | -6.37188400 | 2.12548300  | 2.04441400  |
| H  | -7.06794300 | 0.93586800  | 3.18052800  |
| C  | -3.19184600 | 3.39319700  | 2.52357700  |
| C  | -5.10645200 | -1.22682800 | 3.98270200  |
| C  | -6.43947200 | -1.33292800 | -1.99499500 |
| C  | -4.82284800 | -1.64035900 | -5.32353500 |
| H  | -5.58386400 | -1.69757600 | -6.10942300 |
| H  | -4.77468600 | -0.61154600 | -4.93341200 |
| H  | -3.84231900 | -1.88791700 | -5.75825400 |
| C  | -2.54988900 | -4.02268900 | -4.15220600 |
| C  | 6.01971000  | -2.09539500 | 2.24585000  |
| C  | 3.25877600  | -4.66833100 | -1.34162800 |
| C  | 6.78975900  | -3.81137300 | -0.71312600 |
| H  | 7.41102300  | -3.04496300 | -0.22556200 |
| H  | 7.40691000  | -4.69472300 | -0.91034400 |
| H  | 6.42351300  | -3.40334800 | -1.66723400 |
| C  | 6.49128500  | 2.26835900  | -1.63248500 |
| C  | 2.50354800  | 5.45641000  | -0.53367400 |
| C  | 6.24381700  | 5.38049600  | -0.24429200 |
| H  | 6.17214700  | 6.46336200  | -0.08396000 |
| H  | 6.08891500  | 4.87292000  | 0.71849900  |
| H  | 7.25610300  | 5.15757400  | -0.61109800 |
| Cu | -0.18056500 | 0.55335400  | -1.09568200 |
| C  | -1.90339800 | 2.56990800  | -2.14558700 |
| O  | -0.97209200 | 2.37902300  | -1.15288800 |

|   |             |             |             |
|---|-------------|-------------|-------------|
| C | 0.62785700  | 0.57531600  | -3.39030900 |
| C | -0.70683200 | 0.77504900  | -3.52573400 |
| C | -1.30924200 | 2.13744300  | -3.53877200 |
| H | -1.35832600 | -0.09836100 | -3.66050500 |
| H | -0.52489000 | 2.85723900  | -3.80968400 |
| H | -2.09447000 | 2.20404100  | -4.30897700 |
| C | 1.30372300  | -0.70670700 | -3.49995700 |
| C | 2.63270500  | -0.84044400 | -3.58009300 |
| H | 0.66134900  | -1.59425000 | -3.53034600 |
| H | 3.11341300  | -1.81262200 | -3.67758200 |
| H | 3.28718000  | 0.03230600  | -3.54509000 |
| C | -2.23703500 | 4.06701300  | -2.22301800 |
| C | -3.50719700 | 4.59734700  | -1.98913400 |
| C | -1.19895800 | 4.96960400  | -2.47488700 |
| C | -3.72989400 | 5.97390400  | -1.99884200 |
| H | -4.34766800 | 3.93490800  | -1.78640200 |
| C | -1.41294800 | 6.34026300  | -2.50007700 |
| H | -0.19333000 | 4.57506200  | -2.62654500 |
| C | -2.68609300 | 6.85245500  | -2.25800500 |
| H | -4.73125400 | 6.35754900  | -1.80418500 |
| H | -0.57929900 | 7.01337800  | -2.70372600 |
| H | -2.85979600 | 7.92764500  | -2.27078300 |
| C | -3.18087500 | 1.74154900  | -1.93923600 |
| H | -3.62847300 | 1.94331700  | -0.95365300 |
| H | -3.93818800 | 1.93770600  | -2.71522300 |
| H | -2.94194600 | 0.67199200  | -1.97894300 |
| H | 1.27357800  | 1.45751000  | -3.30120400 |
| C | 1.10010200  | 5.37319500  | 0.08073400  |
| H | 0.40714700  | 4.72713900  | -0.47221800 |
| H | 1.14235600  | 5.01305400  | 1.12089500  |
| H | 0.65353700  | 6.37713000  | 0.09680800  |
| C | 3.29067800  | 6.44489000  | 0.33931400  |
| H | 3.60032700  | 5.98451400  | 1.28927300  |
| H | 4.17658700  | 6.83259000  | -0.16955500 |
| H | 2.65202200  | 7.30523400  | 0.58347000  |
| C | 2.39473600  | 6.02045900  | -1.95473300 |
| H | 1.91613000  | 7.01145800  | -1.93444800 |
| H | 3.38514700  | 6.12543600  | -2.41459700 |
| H | 1.78645100  | 5.36328100  | -2.59261700 |
| C | 6.88980400  | 3.21985100  | -2.76861600 |
| H | 6.99657900  | 4.26044800  | -2.45691200 |
| H | 7.84740400  | 2.89307600  | -3.19771700 |
| H | 6.13723100  | 3.19609200  | -3.56904900 |
| C | 6.52807000  | 0.85851300  | -2.25050700 |

|   |             |             |             |
|---|-------------|-------------|-------------|
| H | 6.42982500  | 0.05425200  | -1.50730500 |
| H | 5.74141500  | 0.72512100  | -3.00596600 |
| H | 7.49775800  | 0.71248000  | -2.74563800 |
| C | 7.54837800  | 2.27570400  | -0.52024600 |
| H | 7.29069600  | 1.54540900  | 0.25969500  |
| H | 8.52929800  | 1.99400100  | -0.93107600 |
| H | 7.66037800  | 3.25084500  | -0.03584900 |
| C | 5.40195900  | -1.65289000 | 3.58577700  |
| H | 4.89753600  | -0.68158200 | 3.53897800  |
| H | 4.66940600  | -2.38219900 | 3.95505400  |
| H | 6.19696400  | -1.56574400 | 4.33913700  |
| C | 6.78392300  | -3.38856100 | 2.55430300  |
| H | 7.44552900  | -3.71442800 | 1.74730100  |
| H | 7.41296700  | -3.21800800 | 3.43922600  |
| H | 6.10380700  | -4.21998200 | 2.78133600  |
| C | 7.01248600  | -1.00920500 | 1.81023800  |
| H | 7.51189000  | -1.26105400 | 0.86376600  |
| H | 6.50123100  | -0.04571900 | 1.66789500  |
| H | 7.79120400  | -0.86945900 | 2.57428800  |
| C | 3.23908200  | -5.85559500 | -0.36794800 |
| H | 2.49649000  | -5.69790400 | 0.42695300  |
| H | 2.96773300  | -6.77649100 | -0.90488700 |
| H | 4.21681700  | -6.00907700 | 0.10084800  |
| C | 1.86721200  | -4.58915400 | -1.98363200 |
| H | 1.07732500  | -4.39894800 | -1.24098200 |
| H | 1.80341900  | -3.81469200 | -2.76412900 |
| H | 1.64429200  | -5.55146100 | -2.46509600 |
| C | 4.25535700  | -4.95272000 | -2.47186900 |
| H | 4.37685900  | -4.07721600 | -3.12728700 |
| H | 5.23792000  | -5.24617600 | -2.09009700 |
| H | 3.88553700  | -5.78208800 | -3.09182800 |
| C | -1.96231700 | -5.18371900 | -3.32780800 |
| H | -1.14351800 | -4.87232200 | -2.66633600 |
| H | -2.73849400 | -5.65122600 | -2.70573500 |
| H | -1.55988300 | -5.95231800 | -4.00273200 |
| C | -3.57483300 | -4.66629900 | -5.09272800 |
| H | -4.43025800 | -5.07403400 | -4.54019700 |
| H | -3.96412800 | -3.98335800 | -5.85324500 |
| H | -3.08612900 | -5.49704500 | -5.62147500 |
| C | -1.42500200 | -3.40279300 | -4.98782500 |
| H | -0.59605700 | -3.05422100 | -4.35555800 |
| H | -1.01550900 | -4.14584300 | -5.68748900 |
| H | -1.77584100 | -2.54339300 | -5.57650400 |
| C | -7.31930600 | -2.58603000 | -2.08840800 |

|   |             |             |             |
|---|-------------|-------------|-------------|
| H | -8.38033300 | -2.30715900 | -2.00875700 |
| H | -7.17579200 | -3.11042800 | -3.03886700 |
| H | -7.09166300 | -3.28281700 | -1.26938700 |
| C | -6.83761100 | -0.34053200 | -3.09499200 |
| H | -6.86274800 | -0.80668000 | -4.08415100 |
| H | -7.84499600 | 0.05027300  | -2.89117600 |
| H | -6.14791100 | 0.51619300  | -3.12197600 |
| C | -6.75028600 | -0.65031400 | -0.65848400 |
| H | -6.51983600 | -1.29188900 | 0.20369000  |
| H | -6.19909600 | 0.29505700  | -0.54249200 |
| H | -7.82269700 | -0.41656500 | -0.61800600 |
| C | -4.23571600 | -2.39498600 | 4.48258100  |
| H | -3.91511600 | -3.07041000 | 3.68109800  |
| H | -3.33087000 | -2.03920400 | 4.99236200  |
| H | -4.81222700 | -3.00040500 | 5.19527000  |
| C | -5.65686900 | -0.55029200 | 5.24482400  |
| H | -6.44492400 | 0.18078300  | 5.04819300  |
| H | -6.08428400 | -1.32268100 | 5.89988900  |
| H | -4.86412300 | -0.03653500 | 5.80543400  |
| C | -6.26512300 | -1.83262400 | 3.17952600  |
| H | -6.95396700 | -1.06578400 | 2.80035700  |
| H | -5.88966400 | -2.39934300 | 2.31443600  |
| H | -6.84627700 | -2.52354000 | 3.80815400  |
| C | -2.98706300 | 3.68365000  | 4.01686600  |
| H | -2.11154700 | 3.13763800  | 4.39899400  |
| H | -2.80578800 | 4.75786000  | 4.16777100  |
| H | -3.85946900 | 3.39350300  | 4.61273000  |
| C | -4.39464100 | 4.18442100  | 1.99567600  |
| H | -5.29401100 | 4.03459900  | 2.60219900  |
| H | -4.16287200 | 5.25924400  | 2.01005300  |
| H | -4.61446000 | 3.91351700  | 0.95152000  |
| C | -1.95786200 | 3.91614300  | 1.77751200  |
| H | -1.03782400 | 3.39334300  | 2.08166700  |
| H | -2.03723400 | 3.82187000  | 0.68525800  |
| H | -1.83239200 | 4.98260600  | 2.01306800  |

**(Z)-(R)-TS3**

|   |            |             |             |
|---|------------|-------------|-------------|
| P | 2.14831700 | 0.33295700  | -0.06492400 |
| C | 1.78313700 | -0.42513600 | 1.57339800  |
| C | 3.07926200 | 1.86555900  | 0.30613400  |
| C | 3.46189800 | -0.82666600 | -0.61241700 |
| C | 1.16744900 | -1.70866400 | 1.57125000  |
| C | 2.09319300 | 0.20986300  | 2.77483500  |
| C | 2.43530100 | 2.89179100  | 0.98979000  |

|   |             |             |             |
|---|-------------|-------------|-------------|
| C | 4.39354300  | 2.06193900  | -0.10972800 |
| C | 4.51121800  | -1.10775700 | 0.25289600  |
| C | 3.41357300  | -1.48430600 | -1.83874700 |
| C | 0.89283600  | -2.55899500 | 0.37573200  |
| C | 0.89645300  | -2.23916300 | 2.81724200  |
| C | 1.81593000  | -0.36329700 | 4.02426900  |
| H | 2.58477000  | 1.18046200  | 2.75229600  |
| C | 3.06948300  | 4.09639200  | 1.31201000  |
| H | 1.40756800  | 2.72832100  | 1.31868400  |
| C | 5.05814000  | 3.27035400  | 0.09025900  |
| H | 4.90309500  | 1.24787800  | -0.61457300 |
| C | 5.57216200  | -1.94607400 | -0.09206400 |
| H | 4.50220700  | -0.64863300 | 1.24106000  |
| C | 4.46288400  | -2.29337100 | -2.27778600 |
| H | 2.52382100  | -1.36998600 | -2.44991600 |
| C | -0.22101700 | -2.44265500 | -0.50714200 |
| C | 1.72205500  | -3.63846800 | 0.15091200  |
| C | 1.20562500  | -1.59280300 | 4.00782800  |
| H | 2.06499500  | 0.14001200  | 4.95568900  |
| C | 4.35285700  | 4.29735500  | 0.75896600  |
| C | 5.58133200  | -2.42221600 | -1.41975500 |
| P | -1.24971200 | -0.93586500 | -0.29874300 |
| C | -0.41374800 | -3.37000600 | -1.52897900 |
| C | 1.51585800  | -4.56263700 | -0.86606600 |
| C | -2.79358900 | -1.11822600 | -1.27405000 |
| C | -1.90445500 | -1.22599100 | 1.39419800  |
| C | 0.45226800  | -4.45839600 | -1.72909000 |
| H | -1.27691800 | -3.26442600 | -2.18576300 |
| C | -4.01857200 | -0.88973900 | -0.65812000 |
| C | -2.77315500 | -1.22267200 | -2.66813600 |
| C | -2.51051900 | -2.44062900 | 1.69069800  |
| C | -1.86451000 | -0.23360600 | 2.37073000  |
| H | 0.28386800  | -5.19026800 | -2.51536000 |
| C | -5.22645000 | -0.83016500 | -1.36031300 |
| H | -4.04227000 | -0.73305400 | 0.41693900  |
| C | -3.94146800 | -1.25859100 | -3.42772700 |
| H | -1.81049700 | -1.27930400 | -3.16823000 |
| C | -3.19845900 | -2.66607200 | 2.88664700  |
| H | -2.47619300 | -3.22901800 | 0.93894900  |
| C | -2.51448600 | -0.38894400 | 3.59628600  |
| H | -1.31802500 | 0.68287500  | 2.15332700  |
| C | -5.17105200 | -1.12822900 | -2.73400700 |
| C | -3.27604200 | -1.57085600 | 3.77199900  |
| C | 0.02713700  | -3.39258400 | 4.48741300  |



|    |             |             |             |
|----|-------------|-------------|-------------|
| H  | -1.04135500 | -3.14027800 | 4.63094900  |
| H  | 0.27152300  | -4.35646500 | 4.94616400  |
| O  | 0.31618600  | -3.44023800 | 3.09909000  |
| O  | 0.83307800  | -2.37596200 | 5.05956800  |
| H  | 3.69643900  | -5.86596000 | 0.83214400  |
| C  | 3.42337300  | -5.05578000 | 0.14674400  |
| H  | 4.31187400  | -4.67128800 | -0.38834400 |
| O  | 2.47385700  | -5.53343200 | -0.79369600 |
| O  | 2.81797200  | -4.00043200 | 0.87533300  |
| O  | 4.98003100  | 5.51685900  | 0.87619200  |
| O  | 6.70256100  | -3.04926800 | -1.91475500 |
| O  | -4.11587000 | -1.62402900 | 4.86218200  |
| O  | -6.33231100 | -1.28361600 | -3.45898100 |
| C  | 7.72038800  | -2.13455800 | -2.27033900 |
| H  | 8.54306900  | -2.72042300 | -2.69388100 |
| H  | 7.36340500  | -1.41099800 | -3.01878100 |
| H  | 8.08950700  | -1.57284600 | -1.39877100 |
| C  | 4.36248300  | -3.04842500 | -3.61338600 |
| C  | 6.57661600  | -2.28094200 | 1.02897600  |
| C  | 6.53776000  | 3.40181500  | -0.30608100 |
| C  | 4.50181700  | 6.49327100  | -0.02701700 |
| H  | 3.50361300  | 6.85950500  | 0.25284900  |
| H  | 5.20617000  | 7.33174800  | 0.00644600  |
| H  | 4.45245500  | 6.10067000  | -1.05300300 |
| C  | 2.33094000  | 5.05043500  | 2.27449000  |
| C  | -3.79229200 | -4.07261600 | 3.10919400  |
| C  | -2.33378900 | 0.63795500  | 4.72664100  |
| C  | -5.45333400 | -1.31355400 | 4.52635400  |
| H  | -5.93094000 | -2.12512800 | 3.95521400  |
| H  | -5.99685400 | -1.17198100 | 5.46690200  |
| H  | -5.51129500 | -0.38969100 | 3.92909600  |
| C  | -6.47396500 | -0.42597800 | -0.54815300 |
| C  | -3.87124600 | -1.32789200 | -4.96345000 |
| C  | -6.93929500 | -2.54507700 | -3.27721200 |
| H  | -7.73669200 | -2.62863000 | -4.02408900 |
| H  | -6.21727300 | -3.36156600 | -3.42579600 |
| H  | -7.38074100 | -2.65202900 | -2.27499900 |
| Cu | 0.21517300  | 0.78622700  | -1.25458200 |
| C  | -1.69356800 | 3.35315300  | -1.01086800 |
| O  | -1.33682300 | 2.07973700  | -1.45349300 |
| C  | -3.06671000 | 3.71276700  | -1.58908000 |
| C  | -3.57959900 | 5.00903800  | -1.52399700 |
| C  | -3.86145200 | 2.71357800  | -2.15850200 |
| C  | -4.83859300 | 5.30638100  | -2.03756900 |

|   |             |             |             |
|---|-------------|-------------|-------------|
| H | -2.99036700 | 5.80584400  | -1.06750100 |
| C | -5.11982600 | 3.00761200  | -2.67419600 |
| H | -3.47163100 | 1.69598900  | -2.19720800 |
| C | -5.61309600 | 4.30798900  | -2.62049100 |
| H | -5.21617800 | 6.32689100  | -1.98276700 |
| H | -5.71146400 | 2.21091300  | -3.13048000 |
| H | -6.59556300 | 4.54249400  | -3.02786200 |
| C | -0.61606100 | 4.35906200  | -1.42915400 |
| H | -0.56997200 | 4.43347900  | -2.52397400 |
| H | -0.78497400 | 5.36861800  | -1.02884300 |
| H | 0.36040800  | 4.00141700  | -1.06326000 |
| C | -2.42583600 | -1.43701700 | -5.46140500 |
| H | -1.81195000 | -0.56936600 | -5.18565500 |
| H | -1.92890400 | -2.34761900 | -5.09308600 |
| H | -2.42962500 | -1.48609900 | -6.55827200 |
| C | -4.61658400 | -2.53888200 | -5.54296800 |
| H | -4.30401400 | -3.47310300 | -5.05342200 |
| H | -5.70178200 | -2.44025900 | -5.45704200 |
| H | -4.38311300 | -2.63318600 | -6.61289500 |
| C | -4.46725100 | -0.03731300 | -5.54421600 |
| H | -4.38635800 | -0.04638700 | -6.64089500 |
| H | -5.52554500 | 0.06993300  | -5.28018300 |
| H | -3.92780800 | 0.84710100  | -5.17496400 |
| C | -7.66903200 | 0.04274300  | -1.38496200 |
| H | -8.16508200 | -0.75641200 | -1.94190200 |
| H | -8.41880400 | 0.47791800  | -0.70933100 |
| H | -7.37227700 | 0.82085400  | -2.09997800 |
| C | -6.11878100 | 0.76763900  | 0.35921000  |
| H | -5.37794300 | 0.50987500  | 1.12886600  |
| H | -5.72755900 | 1.61930100  | -0.21675000 |
| H | -7.02125900 | 1.10208900  | 0.89066500  |
| C | -6.89356700 | -1.58477500 | 0.36420000  |
| H | -6.07734100 | -1.84943500 | 1.05267800  |
| H | -7.76696700 | -1.29731800 | 0.96892300  |
| H | -7.15724100 | -2.49044600 | -0.20026500 |
| C | -2.74520200 | -5.13221200 | 2.72039500  |
| H | -2.43887100 | -5.08396000 | 1.66923900  |
| H | -1.83654600 | -5.04223700 | 3.32930000  |
| H | -3.16480300 | -6.13384600 | 2.88811200  |
| C | -4.18144900 | -4.38848700 | 4.55840500  |
| H | -5.05613000 | -3.83316400 | 4.90832600  |
| H | -4.42331100 | -5.45841900 | 4.63064300  |
| H | -3.35839400 | -4.18176300 | 5.25550700  |
| C | -5.01754200 | -4.27522500 | 2.20879200  |

|   |             |             |             |
|---|-------------|-------------|-------------|
| H | -5.84525400 | -3.60804000 | 2.48652600  |
| H | -4.77874000 | -4.08553300 | 1.15208100  |
| H | -5.38375900 | -5.30895800 | 2.29376900  |
| C | -1.73513100 | -0.07358500 | 5.94977100  |
| H | -0.75872900 | -0.52138500 | 5.71423800  |
| H | -1.58427400 | 0.65254000  | 6.76232300  |
| H | -2.39504500 | -0.86440500 | 6.32309600  |
| C | -1.35354200 | 1.74552600  | 4.32330000  |
| H | -0.37727500 | 1.33921700  | 4.02004300  |
| H | -1.74756500 | 2.36808900  | 3.50687500  |
| H | -1.18447100 | 2.40246000  | 5.18759100  |
| C | -3.64461300 | 1.32250800  | 5.13597000  |
| H | -4.18730200 | 1.69725300  | 4.25800600  |
| H | -4.29864600 | 0.65258900  | 5.70310700  |
| H | -3.42378800 | 2.19028600  | 5.77417800  |
| C | 1.69776000  | 4.22190400  | 3.40933200  |
| H | 0.93031700  | 3.51791000  | 3.06289400  |
| H | 2.46297400  | 3.65209100  | 3.95643100  |
| H | 1.20608700  | 4.89596600  | 4.12417300  |
| C | 3.23587400  | 6.07036300  | 2.97730000  |
| H | 4.10708300  | 5.58588300  | 3.43664700  |
| H | 3.60307800  | 6.86401600  | 2.32195800  |
| H | 2.65904800  | 6.55538700  | 3.77743200  |
| C | 1.19920000  | 5.78121600  | 1.54355200  |
| H | 0.45868100  | 5.07419000  | 1.14621900  |
| H | 0.67982500  | 6.46008800  | 2.23564800  |
| H | 1.56502900  | 6.37791400  | 0.69691900  |
| C | 7.36993500  | 3.58503900  | 0.97033400  |
| H | 8.43701900  | 3.66755100  | 0.71632000  |
| H | 7.07746400  | 4.48914300  | 1.51687300  |
| H | 7.24821700  | 2.71986800  | 1.63866800  |
| C | 6.80652400  | 4.56921400  | -1.26438100 |
| H | 6.70241100  | 5.53971100  | -0.77238200 |
| H | 7.83687800  | 4.50376000  | -1.64220800 |
| H | 6.13375900  | 4.53602300  | -2.13343400 |
| C | 7.04885300  | 2.13806900  | -1.00848300 |
| H | 6.96552200  | 1.24134500  | -0.37828800 |
| H | 6.51954300  | 1.94459600  | -1.95287300 |
| H | 8.11320800  | 2.26993100  | -1.24595300 |
| C | 5.77995200  | -2.74334700 | 2.26445600  |
| H | 5.06038100  | -1.99904500 | 2.62870300  |
| H | 5.21323300  | -3.65905100 | 2.04789900  |
| H | 6.47496900  | -2.96067600 | 3.08758700  |
| C | 7.55504500  | -3.41989700 | 0.72014000  |

|   |             |             |             |
|---|-------------|-------------|-------------|
| H | 8.30647500  | -3.16113200 | -0.03181300 |
| H | 8.09567900  | -3.67325600 | 1.64330800  |
| H | 7.03580800  | -4.32374200 | 0.37693300  |
| C | 7.38196700  | -1.03070400 | 1.40707800  |
| H | 8.02255500  | -0.69572300 | 0.57833900  |
| H | 6.73054600  | -0.18883500 | 1.68549700  |
| H | 8.03603900  | -1.24589800 | 2.26443000  |
| C | 4.53922000  | -4.55536100 | -3.37890400 |
| H | 3.73512900  | -4.95690800 | -2.74468600 |
| H | 4.49531100  | -5.08533300 | -4.34171100 |
| H | 5.50441900  | -4.78328300 | -2.91242400 |
| C | 5.41102000  | -2.56593300 | -4.62439400 |
| H | 6.42462700  | -2.86798500 | -4.34258600 |
| H | 5.20071000  | -3.00409400 | -5.61054100 |
| H | 5.38347700  | -1.47199800 | -4.73412500 |
| C | 2.99049600  | -2.85052100 | -4.26491800 |
| H | 2.16657700  | -3.16763000 | -3.60785300 |
| H | 2.81350700  | -1.80720500 | -4.56282000 |
| H | 2.93909800  | -3.46223200 | -5.17565100 |
| C | -1.05157500 | 2.02797400  | -4.05551400 |
| C | -1.23964600 | 3.29926500  | -4.77162300 |
| H | -1.26942900 | 2.17461500  | -2.76314600 |
| C | -2.39674600 | 3.83422000  | -5.17376300 |
| H | -0.32035800 | 3.87094600  | -4.95284500 |
| H | -2.43128000 | 4.79953500  | -5.67442200 |
| H | -3.35359000 | 3.33875000  | -5.00202000 |
| C | 0.28377100  | 1.54165600  | -3.87724600 |
| H | 1.05932000  | 2.31878400  | -3.93242000 |
| C | 0.71083700  | 0.31137500  | -3.44288600 |
| H | 0.09022700  | -0.58581300 | -3.52718500 |
| H | 1.78371500  | 0.14207800  | -3.38021800 |
| H | -1.81936600 | 1.26493200  | -4.24775300 |
| C | -3.91664100 | 3.02058400  | 1.88758200  |
| C | -2.98482500 | 2.58020600  | 1.02606300  |
| C | -1.79887300 | 3.33639600  | 0.53387100  |
| H | -4.75162100 | 2.35432700  | 2.12807800  |
| H | -3.10564800 | 1.57891800  | 0.60094100  |
| H | -1.81123400 | 4.37083300  | 0.90981900  |
| H | -0.86327800 | 2.86754300  | 0.89932600  |
| C | -3.94724000 | 4.30517100  | 2.56228900  |
| C | -4.89200800 | 4.65210200  | 3.44416400  |
| H | -3.14945100 | 5.01700900  | 2.33982700  |
| H | -4.89406700 | 5.62078600  | 3.93850200  |
| H | -5.70622400 | 3.97127200  | 3.69673900  |

**(E)-(R)-TS3**

|   |             |             |             |
|---|-------------|-------------|-------------|
| P | 2.11227200  | 0.27684000  | 0.08880400  |
| C | 1.80621900  | -0.46405600 | 1.74311900  |
| C | 3.14042300  | 1.75841800  | 0.38482000  |
| C | 3.31373300  | -0.95156600 | -0.55696600 |
| C | 1.08549100  | -1.69026600 | 1.77828500  |
| C | 2.25531500  | 0.12964000  | 2.92189700  |
| C | 2.59608000  | 2.81598500  | 1.10574200  |
| C | 4.41208800  | 1.90626600  | -0.16401400 |
| C | 4.41090100  | -1.29361800 | 0.22240700  |
| C | 3.13594400  | -1.59589500 | -1.77878500 |
| C | 0.72686600  | -2.53798000 | 0.60511700  |
| C | 0.84068700  | -2.20011100 | 3.03743700  |
| C | 2.01538600  | -0.43046800 | 4.18464100  |
| H | 2.82463400  | 1.05654400  | 2.86730200  |
| C | 3.28870000  | 4.01177800  | 1.32112500  |
| H | 1.60001600  | 2.69214400  | 1.53884800  |
| C | 5.12349600  | 3.10048600  | -0.06825400 |
| H | 4.84783500  | 1.06682100  | -0.69582500 |
| C | 5.40419200  | -2.17084200 | -0.21770600 |
| H | 4.49641400  | -0.85211000 | 1.21550000  |
| C | 4.10444400  | -2.45015300 | -2.30603100 |
| H | 2.21159600  | -1.42531300 | -2.32083400 |
| C | -0.37760600 | -2.37557000 | -0.27986800 |
| C | 1.49490400  | -3.66868400 | 0.40449100  |
| C | 1.28879400  | -1.59577500 | 4.20646600  |
| H | 2.37679100  | 0.03528700  | 5.09854500  |
| C | 4.50892200  | 4.16632400  | 0.62893300  |
| C | 5.28498300  | -2.63211300 | -1.54506600 |
| P | -1.32257100 | -0.79572200 | -0.17353900 |
| C | -0.62319700 | -3.32490200 | -1.27325400 |
| C | 1.23913000  | -4.60493200 | -0.58828700 |
| C | -2.77972800 | -1.00858800 | -1.26665200 |
| C | -2.00596700 | -0.90503200 | 1.52910300  |
| C | 0.17694500  | -4.46516400 | -1.44713900 |
| H | -1.47453300 | -3.18958700 | -1.93874900 |
| C | -4.09574100 | -0.93280800 | -0.82913500 |
| C | -2.54661000 | -1.07185800 | -2.64334300 |
| C | -2.75235900 | -2.00767800 | 1.92242100  |
| C | -1.72649100 | 0.08253100  | 2.47369500  |
| H | -0.03409500 | -5.20248100 | -2.21809100 |
| C | -5.18943000 | -0.95775900 | -1.70758000 |
| H | -4.27963400 | -0.82853500 | 0.23712700  |

|   |             |             |             |
|---|-------------|-------------|-------------|
| C | -3.57691700 | -1.19479600 | -3.57072800 |
| H | -1.51748700 | -1.04094400 | -2.99151200 |
| C | -3.32965200 | -2.11322000 | 3.19143400  |
| H | -2.89971700 | -2.81165400 | 1.20047100  |
| C | -2.26115400 | 0.05037700  | 3.76300200  |
| H | -1.07110900 | 0.89987200  | 2.17884400  |
| C | -4.90411300 | -1.17372800 | -3.07188400 |
| C | -3.14773500 | -1.01418600 | 4.05973500  |
| C | -0.03302700 | -3.26594400 | 4.75316500  |
| H | -1.05323000 | -2.87717500 | 4.93817500  |
| H | 0.10912200  | -4.25032400 | 5.21011100  |
| O | 0.18492200  | -3.35373500 | 3.35463700  |
| O | 0.91818700  | -2.35477800 | 5.27738400  |
| H | 3.44315000  | -5.94121300 | 1.06960800  |
| C | 3.14607800  | -5.13595200 | 0.38938800  |
| H | 4.01367400  | -4.75803300 | -0.18594600 |
| O | 2.15467700  | -5.61443200 | -0.50563300 |
| O | 2.57662300  | -4.07127100 | 1.13221700  |
| O | 5.14358600  | 5.38737900  | 0.62010900  |
| O | 6.33809500  | -3.29228200 | -2.13685600 |
| O | -3.84210800 | -0.97075000 | 5.24639000  |
| O | -5.91264200 | -1.30991100 | -3.99955800 |
| C | 7.34055100  | -2.40690100 | -2.59434000 |
| H | 8.09460200  | -3.01503500 | -3.10533200 |
| H | 6.93104400  | -1.66653400 | -3.29813000 |
| H | 7.82019500  | -1.86296600 | -1.76554400 |
| C | 3.85297400  | -3.19768000 | -3.62525500 |
| C | 6.47891400  | -2.56717300 | 0.81438800  |
| C | 6.56112800  | 3.17763600  | -0.60787300 |
| C | 4.56228400  | 6.30175600  | -0.28816600 |
| H | 3.52458700  | 6.54678900  | -0.01697900 |
| H | 5.16656800  | 7.21473000  | -0.25274700 |
| H | 4.56388600  | 5.90388300  | -1.31382700 |
| C | 2.67683800  | 4.99800500  | 2.33649700  |
| C | -4.07777000 | -3.42760200 | 3.49430200  |
| C | -1.84271300 | 1.09467000  | 4.81612200  |
| C | -5.17339500 | -0.51414100 | 5.09436800  |
| H | -5.70877500 | -1.07434700 | 4.31112700  |
| H | -5.67501400 | -0.66971700 | 6.05571700  |
| H | -5.20563000 | 0.55242100  | 4.83076000  |
| C | -6.59651900 | -0.75714600 | -1.10821700 |
| C | -3.25576700 | -1.30355600 | -5.07039400 |
| C | -6.59632300 | -2.54344700 | -4.03389500 |
| H | -6.86423700 | -2.74956200 | -5.07728500 |

|    |             |             |             |
|----|-------------|-------------|-------------|
| H  | -5.96552600 | -3.36337200 | -3.65985000 |
| H  | -7.52516600 | -2.50739600 | -3.44700500 |
| Cu | 0.21436400  | 0.91533300  | -1.07443100 |
| C  | -1.71048900 | 3.53243400  | -0.94450400 |
| O  | -1.26137500 | 2.27775600  | -1.35956500 |
| C  | -3.07188900 | 3.80986000  | -1.58979100 |
| C  | -3.64107000 | 5.08444600  | -1.58474300 |
| C  | -3.79411600 | 2.76406400  | -2.17119900 |
| C  | -4.88303600 | 5.31597200  | -2.16870400 |
| H  | -3.10810000 | 5.91789000  | -1.12490300 |
| C  | -5.03009600 | 2.99499300  | -2.76663000 |
| H  | -3.36432500 | 1.76210000  | -2.16692800 |
| C  | -5.57997700 | 4.27338200  | -2.77115100 |
| H  | -5.30425700 | 6.32084700  | -2.16030100 |
| H  | -5.55257900 | 2.16761400  | -3.25151200 |
| H  | -6.54528800 | 4.45671400  | -3.24130900 |
| C  | -0.67535200 | 4.59995200  | -1.31582700 |
| H  | -0.62545900 | 4.72422900  | -2.40491100 |
| H  | -0.89090500 | 5.58209700  | -0.87216500 |
| H  | 0.31119300  | 4.26988600  | -0.95334200 |
| C  | -1.74509200 | -1.32310500 | -5.33312300 |
| H  | -1.24645300 | -0.39616600 | -5.02166800 |
| H  | -1.24395800 | -2.17180200 | -4.84090500 |
| H  | -1.57650900 | -1.42489800 | -6.41327300 |
| C  | -3.80824600 | -2.60205400 | -5.67574300 |
| H  | -3.52823400 | -3.47533400 | -5.06778100 |
| H  | -4.89501700 | -2.58502400 | -5.78339300 |
| H  | -3.38635500 | -2.74828700 | -6.68017500 |
| C  | -3.83509200 | -0.09360000 | -5.81502900 |
| H  | -3.59526200 | -0.16127500 | -6.88628200 |
| H  | -4.92344200 | -0.03708000 | -5.70719000 |
| H  | -3.40031500 | 0.84291000  | -5.43577200 |
| C  | -7.56121900 | -0.01658000 | -2.04492000 |
| H  | -7.74515200 | -0.51676400 | -2.99697800 |
| H  | -8.52624800 | 0.11167600  | -1.53476000 |
| H  | -7.17291200 | 0.98666500  | -2.27042900 |
| C  | -6.51986600 | 0.11907300  | 0.15217000  |
| H  | -6.04980500 | -0.39557900 | 1.00373700  |
| H  | -5.97171400 | 1.05429800  | -0.03343800 |
| H  | -7.53649200 | 0.38586200  | 0.47263200  |
| C  | -7.18066900 | -2.10718700 | -0.66970900 |
| H  | -6.52439900 | -2.58097700 | 0.07405200  |
| H  | -8.16541300 | -1.95847200 | -0.20242900 |
| H  | -7.30476500 | -2.81686000 | -1.49496000 |

|   |             |             |             |
|---|-------------|-------------|-------------|
| C | -3.13767200 | -4.60728900 | 3.18463600  |
| H | -2.73920400 | -4.59702600 | 2.16391800  |
| H | -2.27802100 | -4.61249500 | 3.86826100  |
| H | -3.67800100 | -5.55475300 | 3.32005800  |
| C | -4.53099500 | -3.63741500 | 4.94375000  |
| H | -5.36546900 | -2.99359400 | 5.23753000  |
| H | -4.87913400 | -4.67535900 | 5.04611000  |
| H | -3.71598400 | -3.48244800 | 5.66055100  |
| C | -5.30595300 | -3.53165900 | 2.58031800  |
| H | -6.00290000 | -2.69572600 | 2.74091200  |
| H | -5.02349000 | -3.52796100 | 1.51780500  |
| H | -5.85152200 | -4.46599300 | 2.77761000  |
| C | -1.20750900 | 0.37474000  | 6.01482000  |
| H | -0.31336900 | -0.18894500 | 5.71847500  |
| H | -0.90208400 | 1.11434200  | 6.76973900  |
| H | -1.91229300 | -0.31838900 | 6.48725500  |
| C | -0.79710900 | 2.06450200  | 4.25369300  |
| H | 0.10388600  | 1.54533600  | 3.89236500  |
| H | -1.20692000 | 2.68119200  | 3.43866000  |
| H | -0.48148700 | 2.74668400  | 5.05541100  |
| C | -3.00576400 | 1.95592900  | 5.32828400  |
| H | -3.58522200 | 2.39754400  | 4.50565100  |
| H | -3.68111700 | 1.38596900  | 5.97285100  |
| H | -2.60078300 | 2.77961900  | 5.93388900  |
| C | 2.33280000  | 4.21043500  | 3.61490300  |
| H | 1.58872800  | 3.42143300  | 3.45082200  |
| H | 3.23375200  | 3.74728900  | 4.04261500  |
| H | 1.91362300  | 4.89288600  | 4.36772200  |
| C | 3.60137400  | 6.13094600  | 2.79799500  |
| H | 4.57446400  | 5.75298000  | 3.13391700  |
| H | 3.78064100  | 6.89416500  | 2.03507700  |
| H | 3.12379900  | 6.63731100  | 3.64874600  |
| C | 1.38322300  | 5.60357500  | 1.78045100  |
| H | 0.63102600  | 4.83149700  | 1.56373700  |
| H | 0.94644000  | 6.29753500  | 2.51328600  |
| H | 1.55806900  | 6.16245900  | 0.85007800  |
| C | 7.51367300  | 3.39476400  | 0.57627300  |
| H | 8.55466500  | 3.43030500  | 0.22247000  |
| H | 7.30007100  | 4.33272200  | 1.10024700  |
| H | 7.43105900  | 2.56875600  | 1.29755200  |
| C | 6.76516200  | 4.29489100  | -1.63850800 |
| H | 6.72514600  | 5.28831300  | -1.18388700 |
| H | 7.75556400  | 4.18768100  | -2.10348700 |
| H | 6.01524000  | 4.23847800  | -2.44062800 |



|   |             |             |             |
|---|-------------|-------------|-------------|
| C | 6.97860600  | 1.87134600  | -1.29477700 |
| H | 6.92348100  | 1.00256600  | -0.62315000 |
| H | 6.36876900  | 1.65487000  | -2.18405400 |
| H | 8.02245000  | 1.96224500  | -1.62448100 |
| C | 5.76068100  | -3.05884100 | 2.08607200  |
| H | 5.07296000  | -2.32181300 | 2.51941700  |
| H | 5.17205500  | -3.96334500 | 1.87935400  |
| H | 6.50576700  | -3.30925100 | 2.85434000  |
| C | 7.40965500  | -3.71202900 | 0.40006400  |
| H | 8.11069100  | -3.44246600 | -0.39588700 |
| H | 8.01085100  | -4.00056600 | 1.27425400  |
| H | 6.85171500  | -4.59732000 | 0.07036700  |
| C | 7.33601000  | -1.34705500 | 1.17518700  |
| H | 7.90745300  | -0.98555700 | 0.30810500  |
| H | 6.72765000  | -0.50978900 | 1.54725800  |
| H | 8.05815400  | -1.60974400 | 1.96165200  |
| C | 3.96382100  | -4.70983500 | -3.38534700 |
| H | 3.20752700  | -5.05627300 | -2.66579500 |
| H | 3.79683300  | -5.24855600 | -4.32964900 |
| H | 4.95478700  | -4.98733400 | -3.00923100 |
| C | 4.83782000  | -2.78496400 | -4.72734600 |
| H | 5.84826800  | -3.16160800 | -4.54187000 |
| H | 4.50583700  | -3.19984800 | -5.68985400 |
| H | 4.87872000  | -1.69136600 | -4.83525200 |
| C | 2.44556100  | -2.92269800 | -4.16765900 |
| H | 1.65952400  | -3.17725600 | -3.44103400 |
| H | 2.31196100  | -1.87425300 | -4.47103500 |
| H | 2.28264100  | -3.54278000 | -5.05950300 |
| C | -0.83066000 | 2.25868800  | -3.94298900 |
| C | -1.04063900 | 3.52294600  | -4.66032900 |
| H | -1.11948000 | 2.38711600  | -2.65898200 |
| C | -2.18176100 | 3.95639900  | -5.20515200 |
| H | -0.16304700 | 4.18024900  | -4.71042900 |
| H | -2.24935300 | 4.92840700  | -5.68898700 |
| H | -3.09457800 | 3.35984100  | -5.17747500 |
| C | 0.51204400  | 1.83306700  | -3.68331000 |
| H | 1.25067700  | 2.64668200  | -3.65833900 |
| C | 0.95823500  | 0.61028000  | -3.25265000 |
| H | 0.37331200  | -0.30153400 | -3.41130100 |
| H | 2.02792800  | 0.47150000  | -3.10231000 |
| H | -1.54983100 | 1.46219200  | -4.18459000 |
| C | -3.98239700 | 3.03154000  | 1.85902100  |
| C | -2.96884900 | 2.64115900  | 1.07310600  |
| C | -1.87916000 | 3.52674400  | 0.58957700  |

|   |             |            |            |
|---|-------------|------------|------------|
| H | -4.05744800 | 4.08027200 | 2.16643300 |
| H | -2.93600600 | 1.60042700 | 0.73690700 |
| H | -2.04900500 | 4.55394300 | 0.95310700 |
| H | -0.90500000 | 3.18962900 | 0.99794100 |
| C | -5.00568300 | 2.12266800 | 2.33571900 |
| C | -6.11257800 | 2.48049100 | 2.99780900 |
| H | -4.82166700 | 1.06209000 | 2.12913100 |
| H | -6.84906500 | 1.74487600 | 3.31850300 |
| H | -6.32983600 | 3.52488100 | 3.22372700 |

**(Z)-(R)-P<sub>l</sub>**

|   |             |             |             |
|---|-------------|-------------|-------------|
| C | 0.08094600  | -0.74672200 | 0.43608500  |
| O | 0.18793900  | -2.16562900 | 0.44873600  |
| C | 1.43827100  | -0.10942200 | 0.16731600  |
| C | 1.70766900  | 1.21848000  | 0.50832700  |
| C | 2.42990500  | -0.84120300 | -0.48945900 |
| C | 2.93811900  | 1.79532600  | 0.21310200  |
| H | 0.94786400  | 1.81521400  | 1.01280600  |
| C | 3.66234900  | -0.26736200 | -0.78305500 |
| H | 2.22084600  | -1.87217300 | -0.77002400 |
| C | 3.92270100  | 1.05288000  | -0.43132500 |
| H | 3.12901600  | 2.83089400  | 0.49124200  |
| H | 4.42405200  | -0.85639900 | -1.29222000 |
| H | 4.88782500  | 1.50267400  | -0.65879600 |
| C | -0.52503100 | -0.28062000 | 1.75496700  |
| H | 0.18524800  | -0.42727900 | 2.58127200  |
| H | -0.80282300 | 0.78134300  | 1.73682400  |
| H | -1.43320600 | -0.85823700 | 1.96165800  |
| C | -3.37194700 | -0.42539500 | -0.45650500 |
| C | -2.20079100 | -1.05826500 | -0.63035700 |
| C | -0.85201900 | -0.42840600 | -0.74665800 |
| H | -4.28085800 | -1.03040900 | -0.39684600 |
| H | -2.20496900 | -2.14780500 | -0.68091500 |
| H | -0.34901700 | -0.79989500 | -1.65387400 |
| H | -0.91446500 | 0.66402100  | -0.84724000 |
| C | -3.57816100 | 1.00622100  | -0.33188700 |
| C | -4.78176100 | 1.56465800  | -0.16236300 |
| H | -2.69840000 | 1.65262000  | -0.37251900 |
| H | -4.91174500 | 2.64012000  | -0.06708500 |
| H | -5.68530700 | 0.95587700  | -0.11464200 |
| H | 0.76093100  | -2.40655600 | 1.19134200  |

**(E)-(R)-P<sub>l</sub>**

|   |             |            |            |
|---|-------------|------------|------------|
| C | -0.17189900 | 0.50606100 | 0.46426600 |
|---|-------------|------------|------------|

|   |             |             |             |
|---|-------------|-------------|-------------|
| O | -0.08073200 | 1.92528500  | 0.52413700  |
| C | -1.59862000 | 0.07404600  | 0.15120100  |
| C | -2.04203200 | -1.22751700 | 0.40177200  |
| C | -2.48314900 | 0.97511700  | -0.44408100 |
| C | -3.33936500 | -1.61152100 | 0.08123500  |
| H | -1.36834800 | -1.95566000 | 0.85341900  |
| C | -3.78290400 | 0.59421300  | -0.76230600 |
| H | -2.13603300 | 1.98472700  | -0.65632600 |
| C | -4.21717700 | -0.70001200 | -0.49756600 |
| H | -3.66703100 | -2.62916800 | 0.28919800  |
| H | -4.45968300 | 1.31426200  | -1.22038700 |
| H | -5.23473800 | -0.99926300 | -0.74379800 |
| C | 0.33261800  | -0.08023000 | 1.77813900  |
| H | -0.37378600 | 0.12800100  | 2.59437500  |
| H | 0.47362000  | -1.16733600 | 1.72421500  |
| H | 1.30219800  | 0.36696400  | 2.02483100  |
| C | 3.18133600  | -0.38845800 | -0.46958800 |
| C | 2.16471800  | 0.48263600  | -0.52410400 |
| C | 0.73645200  | 0.10044700  | -0.71007000 |
| H | 2.97587200  | -1.45967700 | -0.57395400 |
| H | 2.37004000  | 1.55052600  | -0.41155900 |
| H | 0.32226500  | 0.58661100  | -1.60867200 |
| H | 0.64666500  | -0.98647000 | -0.86132800 |
| C | 4.56827100  | -0.00757200 | -0.28354400 |
| C | 5.58696000  | -0.87187700 | -0.23142800 |
| H | 4.76288200  | 1.06369400  | -0.18113200 |
| H | 6.61417600  | -0.54483400 | -0.08894200 |
| H | 5.42408800  | -1.94544900 | -0.33143200 |
| H | -0.61756800 | 2.21879000  | 1.27484400  |

**(Z)-(S)-TS2**

|   |             |             |             |
|---|-------------|-------------|-------------|
| P | -1.58136300 | -0.79928100 | 0.28763400  |
| C | -0.72782200 | -1.94563300 | 1.43208400  |
| C | -2.78148900 | -1.81515200 | -0.64974300 |
| C | -2.58634000 | 0.27748700  | 1.35725500  |
| C | 0.29997200  | -1.39828200 | 2.24970600  |
| C | -0.95204900 | -3.32123000 | 1.39229800  |
| C | -2.26552700 | -2.73228700 | -1.56218300 |
| C | -4.15769800 | -1.58219200 | -0.65221100 |
| C | -3.51388100 | -0.19339400 | 2.27812100  |
| C | -2.40960800 | 1.65097500  | 1.20849200  |
| C | 0.52480900  | 0.05539200  | 2.50242800  |
| C | 1.05614200  | -2.31729600 | 2.94814000  |
| C | -0.17777600 | -4.22833800 | 2.12928000  |

|   |             |             |             |
|---|-------------|-------------|-------------|
| H | -1.74728500 | -3.71232600 | 0.75925900  |
| C | -3.05512200 | -3.36681600 | -2.52412000 |
| H | -1.19544300 | -2.94831600 | -1.54001600 |
| C | -4.99037500 | -2.11529300 | -1.63748400 |
| H | -4.57858500 | -0.93357500 | 0.11307300  |
| C | -4.37922900 | 0.66957000  | 2.96107400  |
| H | -3.57694200 | -1.26969600 | 2.44954900  |
| C | -3.22984600 | 2.56996100  | 1.85506200  |
| H | -1.62230600 | 1.99388700  | 0.53800400  |
| C | 1.38309400  | 0.91969900  | 1.76277100  |
| C | -0.08527300 | 0.61656600  | 3.60567600  |
| C | 0.83316000  | -3.68988700 | 2.88629000  |
| H | -0.36241500 | -5.29961200 | 2.10150900  |
| C | -4.38481800 | -2.91501800 | -2.63118300 |
| C | -4.28974800 | 2.04016600  | 2.62801000  |
| P | 1.91514900  | 0.35133600  | 0.09238400  |
| C | 1.61103700  | 2.22381800  | 2.20110500  |
| C | 0.13070200  | 1.93020100  | 4.01158500  |
| C | 3.07796400  | 1.62568000  | -0.51143400 |
| C | 2.99096300  | -1.07732400 | 0.45711100  |
| C | 0.99718900  | 2.75741500  | 3.34359200  |
| H | 2.27466200  | 2.86830600  | 1.62783300  |
| C | 4.39210700  | 1.35134900  | -0.86374300 |
| C | 2.56498100  | 2.89341400  | -0.78023000 |
| C | 4.07578800  | -0.97627400 | 1.31674900  |
| C | 2.72100100  | -2.29978700 | -0.15028100 |
| H | 1.18167600  | 3.77763400  | 3.67184300  |
| C | 5.23320100  | 2.30879800  | -1.44133700 |
| H | 4.76143900  | 0.34012900  | -0.72394300 |
| C | 3.37150500  | 3.92930700  | -1.24664500 |
| H | 1.50408900  | 3.06058000  | -0.60839100 |
| C | 4.98561100  | -2.02362400 | 1.50211500  |
| H | 4.23098200  | -0.03044200 | 1.83712100  |
| C | 3.57304200  | -3.39223700 | -0.00733900 |
| H | 1.81538200  | -2.37875600 | -0.74918300 |
| C | 4.72117100  | 3.62183600  | -1.54818000 |
| C | 4.75968000  | -3.18871700 | 0.73850200  |
| C | 2.67527800  | -3.34222400 | 4.03676700  |
| H | 3.55484800  | -3.46002800 | 3.37603300  |
| H | 2.95142100  | -3.43364200 | 5.09226200  |
| O | 2.08633000  | -2.07149400 | 3.80780500  |
| O | 1.71167500  | -4.32833300 | 3.70907000  |
| H | -1.66320400 | 0.80707100  | 6.24140700  |
| C | -1.52205400 | 1.10560600  | 5.19789900  |

|    |             |             |             |
|----|-------------|-------------|-------------|
| H  | -2.47754100 | 1.40988700  | 4.72685900  |
| O  | -0.60462400 | 2.18398400  | 5.13195800  |
| O  | -0.96575200 | 0.02488900  | 4.46521400  |
| O  | -5.13295700 | -3.22913700 | -3.74232000 |
| O  | -5.26369800 | 2.91269800  | 3.05907900  |
| O  | 5.70695900  | -4.18802500 | 0.70368200  |
| O  | 5.49439100  | 4.65479300  | -2.03327200 |
| C  | -6.41870100 | 2.86760300  | 2.24539500  |
| H  | -7.10534600 | 3.63329600  | 2.62232400  |
| H  | -6.17623000 | 3.08073500  | 1.19262900  |
| H  | -6.91536900 | 1.88539200  | 2.29206500  |
| C  | -2.93120600 | 4.07294000  | 1.76176200  |
| C  | -5.32850200 | 0.04349900  | 4.00334400  |
| C  | -6.50744300 | -1.87395300 | -1.61152800 |
| C  | -4.77398400 | -2.43954000 | -4.86165400 |
| H  | -5.53623500 | -2.60725700 | -5.63033300 |
| H  | -4.74492200 | -1.37034500 | -4.59835100 |
| H  | -3.78920000 | -2.72157800 | -5.26432700 |
| C  | -2.41386600 | -4.50672000 | -3.33603800 |
| C  | 6.14346400  | -1.77849800 | 2.49026900  |
| C  | 3.18279400  | -4.76642000 | -0.57310400 |
| C  | 6.75074400  | -3.92340000 | -0.21196400 |
| H  | 7.37122600  | -3.07240200 | 0.10694500  |
| H  | 7.37510400  | -4.82257500 | -0.25205200 |
| H  | 6.35876600  | -3.70547400 | -1.21636300 |
| C  | 6.62020000  | 1.84473300  | -1.93140100 |
| C  | 2.76863900  | 5.32917700  | -1.43886500 |
| C  | 6.49565500  | 5.19094700  | -1.19831300 |
| H  | 6.46827400  | 6.28466300  | -1.28382500 |
| H  | 6.33433900  | 4.91511000  | -0.14607000 |
| H  | 7.49386200  | 4.85455900  | -1.51284500 |
| Cu | -0.05598600 | 0.18980600  | -1.21770100 |
| C  | 1.31090700  | 5.37636400  | -0.96722200 |
| H  | 0.67362100  | 4.65915700  | -1.49909300 |
| H  | 1.21705000  | 5.17402700  | 0.11148500  |
| H  | 0.90567000  | 6.38125800  | -1.15068300 |
| C  | 3.51783300  | 6.38522400  | -0.61490800 |
| H  | 3.65321800  | 6.05299900  | 0.42514300  |
| H  | 4.49734100  | 6.62500200  | -1.03554500 |
| H  | 2.93629500  | 7.31804300  | -0.59366100 |
| C  | 2.79241700  | 5.71796300  | -2.92180700 |
| H  | 2.36525700  | 6.72337400  | -3.05441300 |
| H  | 3.81215700  | 5.72143200  | -3.32147400 |
| H  | 2.19053500  | 5.01758400  | -3.51760800 |

|   |             |             |             |
|---|-------------|-------------|-------------|
| C | 7.01709100  | 2.51953500  | -3.25084400 |
| H | 7.12231600  | 3.60391100  | -3.17718400 |
| H | 7.97247200  | 2.10536300  | -3.60319500 |
| H | 6.25953600  | 2.32018900  | -4.02199100 |
| C | 6.62125400  | 0.33363700  | -2.22411600 |
| H | 6.52832900  | -0.27904600 | -1.31542000 |
| H | 5.81363800  | 0.04778900  | -2.91160800 |
| H | 7.57681600  | 0.06204000  | -2.69315100 |
| C | 7.69310300  | 2.06503400  | -0.85596100 |
| H | 7.43048300  | 1.52236000  | 0.06292800  |
| H | 8.66098700  | 1.67785900  | -1.20766800 |
| H | 7.83530900  | 3.11622200  | -0.58839200 |
| C | 5.59189900  | -1.16531800 | 3.78969900  |
| H | 5.02203100  | -0.24256900 | 3.63601300  |
| H | 4.93859000  | -1.87295400 | 4.31701300  |
| H | 6.42840500  | -0.92532200 | 4.46042900  |
| C | 6.91458800  | -3.02944700 | 2.92865600  |
| H | 7.55039400  | -3.45492800 | 2.14719100  |
| H | 7.57280400  | -2.75596200 | 3.76567300  |
| H | 6.23898300  | -3.82149300 | 3.27695100  |
| C | 7.11871900  | -0.76795200 | 1.87243400  |
| H | 7.54644100  | -1.13191600 | 0.92676900  |
| H | 6.61343600  | 0.18583100  | 1.66118600  |
| H | 7.95089100  | -0.56430600 | 2.56200500  |
| C | 3.14021200  | -5.78256400 | 0.57800300  |
| H | 2.39875300  | -5.48810600 | 1.33604400  |
| H | 2.85206900  | -6.77200100 | 0.19315500  |
| H | 4.11628500  | -5.87802500 | 1.06729600  |
| C | 1.78495000  | -4.73286000 | -1.20061400 |
| H | 1.02366000  | -4.39034200 | -0.48452100 |
| H | 1.73726800  | -4.09079400 | -2.09405400 |
| H | 1.51110500  | -5.74931400 | -1.51571900 |
| C | 4.14180200  | -5.26161500 | -1.66281800 |
| H | 4.28500000  | -4.49822500 | -2.44173800 |
| H | 5.11868700  | -5.54478200 | -1.25958100 |
| H | 3.71770200  | -6.15307900 | -2.14668200 |
| C | -1.33788400 | -3.96953400 | -4.28558100 |
| H | -1.75120500 | -3.27004300 | -5.02507700 |
| H | -0.54252100 | -3.43472800 | -3.74907200 |
| H | -0.87156800 | -4.80136400 | -4.83310200 |
| C | -1.74718600 | -5.46684600 | -2.33279900 |
| H | -0.96161600 | -4.98608700 | -1.73669400 |
| H | -2.49044800 | -5.88398000 | -1.63809500 |
| H | -1.27955900 | -6.30293800 | -2.87230400 |

|   |             |             |             |
|---|-------------|-------------|-------------|
| C | -3.40075900 | -5.36633100 | -4.13396300 |
| H | -3.82604100 | -4.85397300 | -5.00202100 |
| H | -2.86491900 | -6.25024700 | -4.50809900 |
| H | -4.23253400 | -5.71631700 | -3.50948800 |
| C | -7.24335900 | -3.22110300 | -1.67831900 |
| H | -8.32966300 | -3.05480700 | -1.63536700 |
| H | -7.01576000 | -3.76485300 | -2.60075900 |
| H | -6.96779200 | -3.85511900 | -0.82353200 |
| C | -6.96999500 | -0.97675400 | -2.76667300 |
| H | -6.87509400 | -1.47644000 | -3.73600700 |
| H | -8.03085600 | -0.71950800 | -2.63111800 |
| H | -6.39657900 | -0.03873100 | -2.80077600 |
| C | -6.94629100 | -1.20966500 | -0.30346400 |
| H | -6.64957500 | -1.80682800 | 0.56965100  |
| H | -6.54626900 | -0.19250400 | -0.16986100 |
| H | -8.04192600 | -1.12853100 | -0.29286400 |
| C | -4.52118100 | -0.87724200 | 4.93653300  |
| H | -3.93204400 | -1.63738700 | 4.41210200  |
| H | -3.83359100 | -0.29642000 | 5.56581200  |
| H | -5.21075100 | -1.40428500 | 5.61074200  |
| C | -6.03580700 | 1.03839800  | 4.93093200  |
| H | -6.82060100 | 1.61762200  | 4.43573900  |
| H | -6.51402500 | 0.47428100  | 5.74450900  |
| H | -5.32977700 | 1.74819400  | 5.38087700  |
| C | -6.38221300 | -0.81337200 | 3.29265900  |
| H | -6.99762800 | -0.21742600 | 2.60400700  |
| H | -5.91517000 | -1.61925000 | 2.70819200  |
| H | -7.05621800 | -1.27762500 | 4.02717700  |
| C | -2.74732000 | 4.62299500  | 3.18389300  |
| H | -1.92832700 | 4.10297800  | 3.70521000  |
| H | -2.49362000 | 5.69252700  | 3.14310100  |
| H | -3.66050600 | 4.51213200  | 3.77961900  |
| C | -4.03544600 | 4.85401700  | 1.03910900  |
| H | -4.96355100 | 4.88970100  | 1.61849500  |
| H | -3.70685400 | 5.89182900  | 0.88357200  |
| H | -4.24663600 | 4.42010000  | 0.04937200  |
| C | -1.62779300 | 4.33535500  | 0.99569600  |
| H | -0.76360500 | 3.82990100  | 1.45522500  |
| H | -1.68457800 | 4.02302400  | -0.05836000 |
| H | -1.42429800 | 5.41550500  | 1.00897000  |
| C | 0.22984800  | -0.63223300 | -3.16352100 |
| C | -0.99333200 | -0.19390100 | -3.72806000 |
| C | -1.21244800 | 0.93031900  | -4.49535400 |
| H | -1.87662300 | -0.77635400 | -3.43193600 |

|   |             |             |             |
|---|-------------|-------------|-------------|
| H | -0.38282000 | 1.40550700  | -5.01765200 |
| H | -2.20248500 | 1.11649500  | -4.91015200 |
| C | 1.51620400  | -0.05858700 | -3.52514900 |
| C | 2.71762400  | -0.65366700 | -3.43025700 |
| H | 1.48881200  | 0.97927500  | -3.87268700 |
| H | 3.63228800  | -0.12611000 | -3.69572600 |
| H | 2.82671600  | -1.68041400 | -3.07172100 |
| C | -1.17358100 | 2.64721100  | -2.79806000 |
| C | -2.65799100 | 2.69993300  | -2.68386100 |
| C | -3.40984800 | 3.73297300  | -3.25696500 |
| C | -3.32154100 | 1.76243600  | -1.88589400 |
| C | -4.77894100 | 3.83165200  | -3.02443400 |
| H | -2.92155100 | 4.48191200  | -3.87839900 |
| C | -4.68047800 | 1.86883500  | -1.63980500 |
| H | -2.74569500 | 0.94201600  | -1.46293200 |
| C | -5.42075000 | 2.90625300  | -2.20687400 |
| H | -5.34373500 | 4.64575200  | -3.47664900 |
| H | -5.15943400 | 1.14194300  | -0.98242100 |
| H | -6.49028900 | 2.98741300  | -2.01464300 |
| C | -0.50825300 | 3.63806400  | -3.72238000 |
| H | -0.96889500 | 3.68289300  | -4.71568900 |
| H | -0.55971400 | 4.64798500  | -3.28069200 |
| H | 0.55054700  | 3.37118700  | -3.82421300 |
| O | -0.49177000 | 2.15979400  | -1.86145600 |
| H | 0.26083700  | -1.67581600 | -2.81907800 |

**(E)-(S)-TS2**

|   |             |             |             |
|---|-------------|-------------|-------------|
| P | -1.58839100 | -0.66411600 | 0.08748100  |
| C | -0.76438800 | -1.82081900 | 1.24934500  |
| C | -2.81174100 | -1.68521900 | -0.81500100 |
| C | -2.54792900 | 0.41382200  | 1.20130100  |
| C | 0.22327200  | -1.29144900 | 2.12718600  |
| C | -1.02434100 | -3.19049600 | 1.21250500  |
| C | -2.30786700 | -2.54596700 | -1.78685400 |
| C | -4.19159400 | -1.58518900 | -0.66567000 |
| C | -3.40244200 | -0.08129000 | 2.18045800  |
| C | -2.36386700 | 1.79007500  | 1.08502900  |
| C | 0.51965400  | 0.15396900  | 2.35457600  |
| C | 0.89588600  | -2.22459400 | 2.89137100  |
| C | -0.33468800 | -4.10947900 | 2.01535800  |
| H | -1.78687700 | -3.56924800 | 0.53391800  |
| C | -3.12761500 | -3.29744500 | -2.63224800 |
| H | -1.22394500 | -2.64163400 | -1.86953000 |
| C | -5.07441800 | -2.24352600 | -1.52501900 |



|   |             |             |             |
|---|-------------|-------------|-------------|
| H | -4.58259500 | -0.94969300 | 0.12463400  |
| C | -4.19171700 | 0.76250700  | 2.96996700  |
| H | -3.45637400 | -1.16165300 | 2.32529900  |
| C | -3.12302600 | 2.68948000  | 1.82795600  |
| H | -1.62803400 | 2.15072100  | 0.36703800  |
| C | 1.37903900  | 0.96971600  | 1.56308400  |
| C | 0.00843100  | 0.75204600  | 3.48975800  |
| C | 0.63394500  | -3.58999100 | 2.83765300  |
| H | -0.54764900 | -5.17544800 | 1.98427500  |
| C | -4.51517400 | -3.03923000 | -2.55060900 |
| C | -4.11593100 | 2.14235000  | 2.67383800  |
| P | 1.91024200  | 0.29863400  | -0.06859200 |
| C | 1.67980200  | 2.27098100  | 1.96235300  |
| C | 0.30541000  | 2.05873700  | 3.86353300  |
| C | 3.13737800  | 1.48949500  | -0.71295700 |
| C | 2.94299900  | -1.12098500 | 0.44334000  |
| C | 1.15241900  | 2.84642900  | 3.12660100  |
| H | 2.34805800  | 2.87290100  | 1.35041300  |
| C | 4.43664000  | 1.12941900  | -1.04507400 |
| C | 2.70555900  | 2.78203900  | -1.01191700 |
| C | 3.96263300  | -0.95690300 | 1.36949300  |
| C | 2.71328800  | -2.38220700 | -0.09515000 |
| H | 1.39682900  | 3.86232800  | 3.42788800  |
| C | 5.33893500  | 2.02171900  | -1.63566500 |
| H | 4.74776500  | 0.10321700  | -0.87134500 |
| C | 3.58551100  | 3.76117200  | -1.46846300 |
| H | 1.65373400  | 3.01824700  | -0.85824000 |
| C | 4.84812800  | -1.98742300 | 1.69977800  |
| H | 4.08334800  | 0.02402800  | 1.82841600  |
| C | 3.54690800  | -3.46229900 | 0.18924700  |
| H | 1.86096000  | -2.49686800 | -0.76015600 |
| C | 4.91366500  | 3.36396900  | -1.75910700 |
| C | 4.67049100  | -3.20859600 | 1.01391400  |
| C | 2.43124900  | -3.28235000 | 4.06491100  |
| H | 3.32725200  | -3.43558900 | 3.43134300  |
| H | 2.66941700  | -3.37008700 | 5.12963400  |
| O | 1.88477400  | -1.99865900 | 3.80459500  |
| O | 1.44779900  | -4.24236100 | 3.71505500  |
| H | -1.32463800 | 1.01755000  | 6.25156900  |
| C | -1.26734800 | 1.30457000  | 5.19675100  |
| H | -2.24976100 | 1.63940000  | 4.81198800  |
| O | -0.32567800 | 2.34948700  | 5.03719400  |
| O | -0.81749900 | 0.20065700  | 4.42719000  |
| O | -5.38770900 | -3.59422200 | -3.45698900 |

|    |             |             |             |
|----|-------------|-------------|-------------|
| O  | -5.03314000 | 3.01425200  | 3.21609900  |
| O  | 5.60113500  | -4.21675500 | 1.14300700  |
| O  | 5.75514700  | 4.34092900  | -2.24351700 |
| C  | -6.26302400 | 3.00556400  | 2.51882000  |
| H  | -6.83917800 | 3.86730000  | 2.87338800  |
| H  | -6.10859000 | 3.09286000  | 1.43142000  |
| H  | -6.83732600 | 2.08720600  | 2.71550700  |
| C  | -2.84418100 | 4.19757900  | 1.75114500  |
| C  | -5.03449900 | 0.12069600  | 4.09196100  |
| C  | -6.59270500 | -2.11534900 | -1.31946200 |
| C  | -5.42332800 | -2.99827000 | -4.73791500 |
| H  | -6.45546000 | -3.05540300 | -5.10421200 |
| H  | -5.11396600 | -1.94323600 | -4.69892700 |
| H  | -4.78038100 | -3.53538900 | -5.44964700 |
| C  | -2.46496700 | -4.34300100 | -3.55036900 |
| C  | 5.92976200  | -1.66303000 | 2.75016200  |
| C  | 3.20522900  | -4.86528900 | -0.33569700 |
| C  | 6.73083300  | -4.04120300 | 0.31228800  |
| H  | 7.38683200  | -3.23615800 | 0.67550000  |
| H  | 7.28901400  | -4.98385500 | 0.32488900  |
| H  | 6.43697700  | -3.80536000 | -0.72099700 |
| C  | 6.68965100  | 1.45791500  | -2.12033100 |
| C  | 3.07428000  | 5.19326400  | -1.69518800 |
| C  | 6.79294600  | 4.79396200  | -1.40233600 |
| H  | 6.83720100  | 5.88860300  | -1.46339800 |
| H  | 6.61581100  | 4.50812000  | -0.35567400 |
| H  | 7.76492100  | 4.39667100  | -1.72794300 |
| Cu | -0.07589000 | 0.33114200  | -1.41359200 |
| C  | 1.66931600  | 5.38090100  | -1.11053000 |
| H  | 0.92970100  | 4.69089400  | -1.53074100 |
| H  | 1.66295700  | 5.25290500  | -0.01668600 |
| H  | 1.32473200  | 6.40209800  | -1.32613100 |
| C  | 3.95707800  | 6.25153400  | -1.01724100 |
| H  | 4.20456000  | 5.96610700  | 0.01603300  |
| H  | 4.88552800  | 6.43169200  | -1.56406800 |
| H  | 3.41485000  | 7.20674700  | -0.97462600 |
| C  | 3.01662200  | 5.47202300  | -3.20164600 |
| H  | 2.64664100  | 6.49161000  | -3.38684600 |
| H  | 4.00807500  | 5.37572100  | -3.66031300 |
| H  | 2.33727700  | 4.76933400  | -3.70375300 |
| C  | 7.14555100  | 2.10181500  | -3.43646900 |
| H  | 7.32492700  | 3.17644500  | -3.36388300 |
| H  | 8.07380300  | 1.62096900  | -3.77568600 |
| H  | 6.38556000  | 1.95316600  | -4.21633700 |

|   |             |             |             |
|---|-------------|-------------|-------------|
| C | 6.57583300  | -0.04843100 | -2.41687300 |
| H | 6.45386100  | -0.65449600 | -1.50728700 |
| H | 5.74050900  | -0.27227000 | -3.09470900 |
| H | 7.50258200  | -0.38794500 | -2.89925800 |
| C | 7.77010100  | 1.59585000  | -1.03926000 |
| H | 7.46319100  | 1.07193600  | -0.12297900 |
| H | 8.70891700  | 1.13959900  | -1.38673700 |
| H | 7.98660500  | 2.63406600  | -0.76991200 |
| C | 5.29702000  | -0.88179500 | 3.91709900  |
| H | 4.88508600  | 0.08934000  | 3.62132600  |
| H | 4.48561700  | -1.44947900 | 4.39117800  |
| H | 6.06252900  | -0.68490100 | 4.68008800  |
| C | 6.60943100  | -2.87787800 | 3.39247600  |
| H | 7.26692600  | -3.43031200 | 2.71707500  |
| H | 7.22920000  | -2.52805000 | 4.23017900  |
| H | 5.87511600  | -3.58838700 | 3.79454800  |
| C | 6.99017200  | -0.75947700 | 2.10565400  |
| H | 7.50906900  | -1.25721300 | 1.27383400  |
| H | 6.53113000  | 0.15726300  | 1.70590000  |
| H | 7.74868300  | -0.46469300 | 2.84563000  |
| C | 3.06303100  | -5.82629700 | 0.85310200  |
| H | 2.26112400  | -5.49852100 | 1.52987400  |
| H | 2.80820800  | -6.83420300 | 0.49322000  |
| H | 3.99279000  | -5.89500200 | 1.42887000  |
| C | 1.87115000  | -4.86231700 | -1.08841600 |
| H | 1.04696300  | -4.47282600 | -0.47424100 |
| H | 1.91966000  | -4.26791700 | -2.01408200 |
| H | 1.61473900  | -5.89178700 | -1.37500400 |
| C | 4.25428200  | -5.40924600 | -1.31352800 |
| H | 4.45847900  | -4.68582100 | -2.11691900 |
| H | 5.19559900  | -5.66324900 | -0.81746200 |
| H | 3.87506700  | -6.32827200 | -1.78301800 |
| C | -1.98383700 | -3.70111800 | -4.85849900 |
| H | -2.79828100 | -3.23682800 | -5.42717000 |
| H | -1.23341500 | -2.92132200 | -4.66906900 |
| H | -1.51747100 | -4.46237700 | -5.50088300 |
| C | -1.22823700 | -4.93359600 | -2.84978200 |
| H | -0.41107200 | -4.21056500 | -2.73122400 |
| H | -1.47801600 | -5.32831400 | -1.85357500 |
| H | -0.82792600 | -5.76039200 | -3.45208200 |
| C | -3.37528300 | -5.54109000 | -3.85079800 |
| H | -4.22741600 | -5.30240300 | -4.49051800 |
| H | -2.78652500 | -6.31714900 | -4.35909500 |
| H | -3.77227200 | -5.97441800 | -2.92230200 |

|   |             |             |             |
|---|-------------|-------------|-------------|
| C | -7.22230000 | -3.50510900 | -1.14962100 |
| H | -8.30578900 | -3.40649100 | -0.98842300 |
| H | -7.06074100 | -4.13627200 | -2.02721600 |
| H | -6.79818000 | -4.01516400 | -0.27315200 |
| C | -7.26203100 | -1.37440300 | -2.48446000 |
| H | -7.26869600 | -1.96602900 | -3.40437800 |
| H | -8.30977800 | -1.15667800 | -2.23079400 |
| H | -6.76090700 | -0.41742500 | -2.69195500 |
| C | -6.92161200 | -1.33853500 | -0.04154100 |
| H | -6.48431100 | -1.81851500 | 0.84398600  |
| H | -6.58116000 | -0.29186100 | -0.06214100 |
| H | -8.01115100 | -1.32211400 | 0.09716900  |
| C | -4.17296100 | -0.90455400 | 4.85157100  |
| H | -3.79241800 | -1.71271700 | 4.21697800  |
| H | -3.30661400 | -0.43063400 | 5.33059200  |
| H | -4.77838200 | -1.37080000 | 5.64118600  |
| C | -5.54480700 | 1.10010100  | 5.15619200  |
| H | -6.33098600 | 1.77013200  | 4.79694700  |
| H | -5.96337400 | 0.52024400  | 5.99108000  |
| H | -4.73539800 | 1.72639300  | 5.55428900  |
| C | -6.22697200 | -0.63632400 | 3.49685500  |
| H | -6.88917000 | 0.01991100  | 2.91532800  |
| H | -5.89101000 | -1.44347700 | 2.83138600  |
| H | -6.82605900 | -1.09301500 | 4.29814100  |
| C | -2.56804400 | 4.72525100  | 3.16604800  |
| H | -1.69457800 | 4.22205300  | 3.60710900  |
| H | -2.35105100 | 5.80296000  | 3.12851300  |
| H | -3.42637500 | 4.57131900  | 3.83013000  |
| C | -4.00895400 | 4.97326900  | 1.12244600  |
| H | -4.89125900 | 4.99321000  | 1.77037200  |
| H | -3.70452300 | 6.01623700  | 0.95151000  |
| H | -4.29041900 | 4.54440100  | 0.14811100  |
| C | -1.60441900 | 4.49514500  | 0.89848400  |
| H | -0.70269000 | 3.97800200  | 1.26356100  |
| H | -1.75170500 | 4.21981200  | -0.15585100 |
| H | -1.40328300 | 5.57514000  | 0.93484200  |
| C | -1.35892100 | 2.92506500  | -2.64147300 |
| C | -2.84353900 | 2.90910700  | -2.49780000 |
| C | -3.62363600 | 4.01860300  | -2.84604900 |
| C | -3.48161500 | 1.81322900  | -1.90770900 |
| C | -4.99461500 | 4.03316300  | -2.60023000 |
| H | -3.15840200 | 4.89309400  | -3.29832900 |
| C | -4.84314400 | 1.82906300  | -1.65393500 |
| H | -2.88655700 | 0.93118400  | -1.67754000 |

|   |             |             |             |
|---|-------------|-------------|-------------|
| C | -5.61117100 | 2.94252500  | -1.99696700 |
| H | -5.58055600 | 4.90942200  | -2.87495800 |
| H | -5.30900500 | 0.96091500  | -1.18599000 |
| H | -6.68259300 | 2.95321400  | -1.79991700 |
| C | -0.75435300 | 4.04344200  | -3.45555800 |
| H | -1.27733500 | 4.22620300  | -4.40131800 |
| H | -0.77108600 | 4.97870000  | -2.87057500 |
| H | 0.29414700  | 3.79733200  | -3.66354300 |
| O | -0.63662300 | 2.38108600  | -1.76469400 |
| C | 0.45707600  | 0.07447900  | -3.46767700 |
| C | 1.08728900  | -1.22605000 | -3.32888800 |
| C | 2.41344900  | -1.45550000 | -3.28274400 |
| H | 2.82485100  | -2.45859100 | -3.17566600 |
| H | 3.13012100  | -0.63329600 | -3.34926400 |
| C | -0.86571700 | 0.24780100  | -3.93451400 |
| H | -1.56388800 | -0.58338400 | -3.76109800 |
| C | -1.35358400 | 1.41699900  | -4.48521500 |
| H | -0.64357400 | 2.09367600  | -4.95816900 |
| H | -2.37666800 | 1.46459900  | -4.85558400 |
| H | 1.14836000  | 0.90583500  | -3.66625400 |
| H | 0.40956100  | -2.08919500 | -3.26698300 |

**(Z)-(S)-C**

|   |             |             |             |
|---|-------------|-------------|-------------|
| P | -1.58914600 | -0.80384500 | 0.29698000  |
| C | -0.74590200 | -1.93076300 | 1.46658400  |
| C | -2.78078900 | -1.84105400 | -0.62746200 |
| C | -2.58831400 | 0.30850400  | 1.33106000  |
| C | 0.29658500  | -1.36896900 | 2.25448700  |
| C | -0.99015500 | -3.30342000 | 1.47789400  |
| C | -2.26576300 | -2.79029000 | -1.50873100 |
| C | -4.15568800 | -1.60348100 | -0.64327600 |
| C | -3.52484100 | -0.13168500 | 2.25851500  |
| C | -2.39680000 | 1.67614800  | 1.14218200  |
| C | 0.53163500  | 0.08982800  | 2.46004900  |
| C | 1.04972200  | -2.27246100 | 2.97531300  |
| C | -0.21881500 | -4.19424900 | 2.23786700  |
| H | -1.79796700 | -3.70535200 | 0.86764600  |
| C | -3.05577200 | -3.45263600 | -2.45145100 |
| H | -1.20013800 | -3.02572200 | -1.46278200 |
| C | -4.98971500 | -2.16961400 | -1.60917500 |
| H | -4.57454400 | -0.92422000 | 0.09603100  |
| C | -4.39108700 | 0.75658500  | 2.90613900  |
| H | -3.59491400 | -1.20225200 | 2.46014500  |
| C | -3.21907100 | 2.61650900  | 1.75520500  |

|   |             |             |             |
|---|-------------|-------------|-------------|
| H | -1.61445600 | 1.99722300  | 0.45223100  |
| C | 1.39430200  | 0.92758000  | 1.69561600  |
| C | -0.07488200 | 0.68583400  | 3.54743100  |
| C | 0.80875300  | -3.64335300 | 2.96295700  |
| H | -0.41660000 | -5.26353000 | 2.24960100  |
| C | -4.38535200 | -3.00300000 | -2.57445000 |
| C | -4.29069500 | 2.11541000  | 2.53001600  |
| P | 1.91143500  | 0.32230000  | 0.03153800  |
| C | 1.63669500  | 2.23854500  | 2.10323400  |
| C | 0.15238200  | 2.00779700  | 3.91860400  |
| C | 3.06444300  | 1.59036200  | -0.60781800 |
| C | 2.99359100  | -1.09789200 | 0.42172000  |
| C | 1.02972300  | 2.80733000  | 3.23180400  |
| H | 2.30237200  | 2.86362000  | 1.51213100  |
| C | 4.38030100  | 1.32928200  | -0.96930800 |
| C | 2.53811000  | 2.85999700  | -0.85330300 |
| C | 4.08952400  | -0.96591700 | 1.26346000  |
| C | 2.70975900  | -2.34661400 | -0.12523000 |
| H | 1.22410300  | 3.83462500  | 3.53088600  |
| C | 5.21046800  | 2.30698700  | -1.53213000 |
| H | 4.76472900  | 0.32151900  | -0.83413400 |
| C | 3.34819800  | 3.91738700  | -1.26439300 |
| H | 1.46832300  | 3.00592400  | -0.71041400 |
| C | 4.99913900  | -2.00779700 | 1.47969000  |
| H | 4.25359000  | -0.00020900 | 1.74357900  |
| C | 3.55801100  | -3.43585500 | 0.05723300  |
| H | 1.79195900  | -2.45366500 | -0.70048200 |
| C | 4.69817300  | 3.62317600  | -1.57519800 |
| C | 4.76075700  | -3.20112500 | 0.76745600  |
| C | 2.67718100  | -3.28031700 | 4.06183700  |
| H | 3.53259700  | -3.42832100 | 3.37553000  |
| H | 2.98587400  | -3.34413300 | 5.11002100  |
| O | 2.09403800  | -2.01131200 | 3.81340500  |
| O | 1.69357100  | -4.26534200 | 3.79292900  |
| H | -1.65364000 | 0.96086100  | 6.17559600  |
| C | -1.50873300 | 1.22979500  | 5.12457700  |
| H | -2.46064400 | 1.52993700  | 4.64447700  |
| O | -0.58114500 | 2.29749500  | 5.03069100  |
| O | -0.96043400 | 0.12458400  | 4.42211200  |
| O | -5.13359700 | -3.35712100 | -3.67370800 |
| O | -5.27611900 | 3.00238300  | 2.90183000  |
| O | 5.71419000  | -4.19538100 | 0.74654800  |
| O | 5.48070600  | 4.67774200  | -1.99304000 |
| C | -6.39963300 | 2.92813200  | 2.04542800  |

|    |             |             |             |
|----|-------------|-------------|-------------|
| H  | -7.06231000 | 3.75778800  | 2.31428900  |
| H  | -6.10407000 | 3.02155800  | 0.98831700  |
| H  | -6.94427900 | 1.97790800  | 2.16778900  |
| C  | -2.91776200 | 4.11504800  | 1.61246900  |
| C  | -5.35264800 | 0.17234500  | 3.96000200  |
| C  | -6.50589700 | -1.92146600 | -1.59121600 |
| C  | -4.78142700 | -2.60676500 | -4.81999600 |
| H  | -5.54146900 | -2.80861300 | -5.58256600 |
| H  | -4.76260400 | -1.52853800 | -4.59722400 |
| H  | -3.79441100 | -2.89681500 | -5.21288300 |
| C  | -2.42050100 | -4.62510000 | -3.22077500 |
| C  | 6.16442600  | -1.73087100 | 2.44988700  |
| C  | 3.15039600  | -4.83802100 | -0.42035900 |
| C  | 6.72885400  | -3.95117300 | -0.20667700 |
| H  | 7.32980100  | -3.06534400 | 0.05075400  |
| H  | 7.37884700  | -4.83285300 | -0.21400100 |
| H  | 6.30608000  | -3.80097200 | -1.21154900 |
| C  | 6.58761600  | 1.86715500  | -2.07194800 |
| C  | 2.75057900  | 5.32838700  | -1.38365900 |
| C  | 6.47947800  | 5.14114400  | -1.11193900 |
| H  | 6.46885700  | 6.23810200  | -1.12121400 |
| H  | 6.30147100  | 4.79579000  | -0.08327100 |
| H  | 7.47718100  | 4.81200100  | -1.43560700 |
| Cu | -0.12793100 | 0.34220100  | -1.14405700 |
| C  | 1.31133500  | 5.36549800  | -0.85844800 |
| H  | 0.64309700  | 4.66017000  | -1.36588900 |
| H  | 1.27009300  | 5.14314100  | 0.21991500  |
| H  | 0.90252400  | 6.37564800  | -1.00208200 |
| C  | 3.53148000  | 6.35084900  | -0.54544100 |
| H  | 3.71196500  | 5.97657100  | 0.47365000  |
| H  | 4.48968800  | 6.61744300  | -0.99761200 |
| H  | 2.94448900  | 7.27632600  | -0.45901000 |
| C  | 2.74346400  | 5.77537900  | -2.85042500 |
| H  | 2.33460500  | 6.79366600  | -2.93143100 |
| H  | 3.75452800  | 5.77653300  | -3.27437600 |
| H  | 2.11167600  | 5.11430300  | -3.45901500 |
| C  | 6.99607500  | 2.64386200  | -3.33086100 |
| H  | 7.14987000  | 3.71154800  | -3.16470100 |
| H  | 7.93006500  | 2.22431900  | -3.73103500 |
| H  | 6.22405800  | 2.54616100  | -4.10689900 |
| C  | 6.55194800  | 0.39025200  | -2.50373900 |
| H  | 6.42940600  | -0.30794700 | -1.66359400 |
| H  | 5.74475500  | 0.20344200  | -3.22562600 |
| H  | 7.50333400  | 0.13549700  | -2.99041300 |

|   |             |             |             |
|---|-------------|-------------|-------------|
| C | 7.66911500  | 1.97397300  | -0.98916000 |
| H | 7.40621700  | 1.35035400  | -0.12357900 |
| H | 8.63298600  | 1.61561100  | -1.38022600 |
| H | 7.81811300  | 2.99532900  | -0.62490700 |
| C | 5.61311300  | -1.10243300 | 3.74177400  |
| H | 5.02615600  | -0.19271900 | 3.57479000  |
| H | 4.97539600  | -1.81154000 | 4.28601300  |
| H | 6.45003300  | -0.83646300 | 4.40213000  |
| C | 6.95954800  | -2.96146700 | 2.90181400  |
| H | 7.58800700  | -3.39265600 | 2.11727300  |
| H | 7.62839100  | -2.66035700 | 3.72085000  |
| H | 6.30337800  | -3.75636300 | 3.27870700  |
| C | 7.12264500  | -0.72263500 | 1.80375000  |
| H | 7.55600500  | -1.10978600 | 0.86982500  |
| H | 6.60443700  | 0.21739100  | 1.56473100  |
| H | 7.95225100  | -0.48730000 | 2.48613800  |
| C | 3.16134400  | -5.79419500 | 0.78192900  |
| H | 2.46741300  | -5.45124500 | 1.56435800  |
| H | 2.84277200  | -6.79817400 | 0.46516600  |
| H | 4.16163300  | -5.87681300 | 1.22156400  |
| C | 1.72575800  | -4.84519300 | -0.98624800 |
| H | 0.98744900  | -4.48511600 | -0.25359900 |
| H | 1.63203900  | -4.24154200 | -1.90318100 |
| H | 1.45327300  | -5.87637000 | -1.25125100 |
| C | 4.06802100  | -5.38107700 | -1.52244800 |
| H | 4.16817900  | -4.65824900 | -2.34616200 |
| H | 5.06562900  | -5.62713800 | -1.14646300 |
| H | 3.63976400  | -6.30358700 | -1.94023500 |
| C | -1.33345400 | -4.12723800 | -4.17943000 |
| H | -1.72450700 | -3.40027700 | -4.90523500 |
| H | -0.50672500 | -3.64225000 | -3.64292100 |
| H | -0.91024100 | -4.97171200 | -4.74216100 |
| C | -1.76876100 | -5.56146600 | -2.18616400 |
| H | -0.99673100 | -5.06633700 | -1.58343700 |
| H | -2.52366700 | -5.96698800 | -1.49754800 |
| H | -1.28858000 | -6.40669800 | -2.70011800 |
| C | -3.40732000 | -5.50031200 | -4.00236300 |
| H | -3.81619500 | -5.01295300 | -4.89262400 |
| H | -2.87587600 | -6.40142400 | -4.34017900 |
| H | -4.25013600 | -5.82118500 | -3.37777400 |
| C | -7.25113800 | -3.26476500 | -1.62577900 |
| H | -8.33582800 | -3.08858800 | -1.58327300 |
| H | -7.03189900 | -3.83151700 | -2.53581200 |
| H | -6.97850200 | -3.88136700 | -0.75733500 |



|   |             |             |             |
|---|-------------|-------------|-------------|
| C | -6.96013800 | -1.04748800 | -2.76702000 |
| H | -6.87051900 | -1.57073700 | -3.72454700 |
| H | -8.01891800 | -0.77889100 | -2.63802200 |
| H | -6.37959900 | -0.11453300 | -2.82049400 |
| C | -6.94084100 | -1.22395400 | -0.29972800 |
| H | -6.64576500 | -1.80109900 | 0.58722500  |
| H | -6.53534500 | -0.20633900 | -0.19332600 |
| H | -8.03595100 | -1.13739500 | -0.29020100 |
| C | -4.55902700 | -0.72594300 | 4.92593900  |
| H | -3.98589500 | -1.51491200 | 4.42645300  |
| H | -3.85844700 | -0.13448300 | 5.53062800  |
| H | -5.25504800 | -1.21582700 | 5.62137300  |
| C | -6.05398100 | 1.20601700  | 4.84759900  |
| H | -6.82559000 | 1.77897300  | 4.32522300  |
| H | -6.54618300 | 0.67707700  | 5.67655700  |
| H | -5.34134000 | 1.92175400  | 5.27788600  |
| C | -6.41070600 | -0.69785400 | 3.27258700  |
| H | -7.01752400 | -0.11949600 | 2.56190200  |
| H | -5.94719700 | -1.52581000 | 2.71662600  |
| H | -7.09222600 | -1.13319200 | 4.01795200  |
| C | -2.75983600 | 4.71369400  | 3.01802200  |
| H | -1.95270700 | 4.20854200  | 3.57258700  |
| H | -2.49895900 | 5.77976400  | 2.94450900  |
| H | -3.68460200 | 4.62834400  | 3.60059200  |
| C | -4.00880800 | 4.86914900  | 0.84229800  |
| H | -4.94825800 | 4.92675500  | 1.40164100  |
| H | -3.67540000 | 5.90028200  | 0.65584500  |
| H | -4.20013100 | 4.40024800  | -0.13520200 |
| C | -1.60206300 | 4.34727500  | 0.85863400  |
| H | -0.74581100 | 3.86836200  | 1.35998700  |
| H | -1.62419600 | 3.97790600  | -0.17819300 |
| H | -1.40279700 | 5.42838000  | 0.82880900  |
| C | 0.31048300  | -0.80019900 | -3.17536100 |
| C | -0.81238000 | -0.07370200 | -3.42576600 |
| C | -0.83222900 | 1.30512900  | -3.98822500 |
| H | -1.77610200 | -0.55915600 | -3.23277700 |
| H | 0.14517800  | 1.52490800  | -4.44067500 |
| H | -1.57489300 | 1.36311800  | -4.80032600 |
| C | 1.68940300  | -0.38928700 | -3.41624500 |
| C | 2.72105100  | -1.24134300 | -3.39178100 |
| H | 1.87474400  | 0.67039200  | -3.60802600 |
| H | 3.74330000  | -0.91123600 | -3.56433500 |
| H | 2.57871800  | -2.30608600 | -3.19360200 |
| C | -1.12537400 | 2.44769100  | -2.93692500 |

|   |             |             |             |
|---|-------------|-------------|-------------|
| C | -2.65133300 | 2.59235900  | -2.77778700 |
| C | -3.40622700 | 3.59056600  | -3.40362900 |
| C | -3.33299000 | 1.71043400  | -1.93707800 |
| C | -4.77568800 | 3.71640500  | -3.17763300 |
| H | -2.92310900 | 4.30019100  | -4.07345300 |
| C | -4.69506800 | 1.83487000  | -1.69539900 |
| H | -2.76343300 | 0.92882600  | -1.44100700 |
| C | -5.42946100 | 2.84379000  | -2.31382800 |
| H | -5.33090200 | 4.51155000  | -3.67456900 |
| H | -5.17978700 | 1.14503900  | -1.00189800 |
| H | -6.49819000 | 2.94564600  | -2.12493400 |
| C | -0.53447500 | 3.71818200  | -3.56103500 |
| H | -0.84514800 | 3.87763800  | -4.60481000 |
| H | -0.80380600 | 4.60905400  | -2.97674800 |
| H | 0.55895700  | 3.60883200  | -3.54172000 |
| O | -0.51513100 | 2.20368400  | -1.73361700 |
| H | 0.18911400  | -1.83322800 | -2.83229300 |

**(E)-(S)-C**

|   |             |             |             |
|---|-------------|-------------|-------------|
| P | -1.59481100 | -0.66713000 | 0.07644600  |
| C | -0.77465400 | -1.84200500 | 1.22049600  |
| C | -2.83232200 | -1.67356400 | -0.82941300 |
| C | -2.53384200 | 0.41546100  | 1.19999100  |
| C | 0.22544100  | -1.33119900 | 2.09517800  |
| C | -1.05237400 | -3.20774700 | 1.17505300  |
| C | -2.35771500 | -2.49004500 | -1.85332200 |
| C | -4.20876000 | -1.58666900 | -0.63547800 |
| C | -3.37131000 | -0.06966300 | 2.19918500  |
| C | -2.35177100 | 1.79150500  | 1.05906700  |
| C | 0.54400100  | 0.10940300  | 2.32172600  |
| C | 0.88444600  | -2.27713900 | 2.85553800  |
| C | -0.37323000 | -4.14028300 | 1.97123600  |
| H | -1.82151700 | -3.57185000 | 0.49517900  |
| C | -3.20495700 | -3.18024200 | -2.72620500 |
| H | -1.27574300 | -2.60165100 | -1.95585900 |
| C | -5.11653200 | -2.18318700 | -1.51316600 |
| H | -4.57615400 | -0.99686500 | 0.19998000  |
| C | -4.16686000 | 0.78351500  | 2.97280700  |
| H | -3.41745100 | -1.14769400 | 2.36858300  |
| C | -3.09604200 | 2.69624700  | 1.81104300  |
| H | -1.64033000 | 2.15045000  | 0.31128900  |
| C | 1.40228900  | 0.92211700  | 1.52571200  |
| C | 0.04965300  | 0.70778500  | 3.46400200  |
| C | 0.60076000  | -3.63783100 | 2.79746100  |

|   |             |             |             |
|---|-------------|-------------|-------------|
| H | -0.59924000 | -5.20351500 | 1.93463200  |
| C | -4.58411600 | -2.90374900 | -2.60496600 |
| C | -4.09421700 | 2.15721300  | 2.65556800  |
| P | 1.91447500  | 0.27196100  | -0.12172400 |
| C | 1.71856400  | 2.21837500  | 1.92863400  |
| C | 0.35932800  | 2.01063400  | 3.84046800  |
| C | 3.16464300  | 1.45442800  | -0.74003500 |
| C | 2.91949400  | -1.18032600 | 0.36535800  |
| C | 1.20845400  | 2.79291700  | 3.10064800  |
| H | 2.37981500  | 2.82063700  | 1.31014700  |
| C | 4.48098700  | 1.11347400  | -1.02726700 |
| C | 2.72322700  | 2.74414100  | -1.03848500 |
| C | 3.94584000  | -1.03624500 | 1.28916300  |
| C | 2.65659500  | -2.44284200 | -0.15747100 |
| H | 1.46209800  | 3.80669200  | 3.40110400  |
| C | 5.39300500  | 2.03202400  | -1.56070200 |
| H | 4.79901300  | 0.08806900  | -0.85990400 |
| C | 3.60671700  | 3.74385000  | -1.44278500 |
| H | 1.65800400  | 2.95693400  | -0.94014600 |
| C | 4.81022900  | -2.08323600 | 1.62259100  |
| H | 4.08965400  | -0.05655700 | 1.74447900  |
| C | 3.46463100  | -3.54047400 | 0.13575100  |
| H | 1.78988000  | -2.55273500 | -0.80484600 |
| C | 4.95204700  | 3.37067300  | -1.67553700 |
| C | 4.60499000  | -3.30181100 | 0.94134700  |
| C | 2.40576200  | -3.36340600 | 4.02130400  |
| H | 3.29956000  | -3.52860400 | 3.38620200  |
| H | 2.64468600  | -3.45902600 | 5.08521100  |
| O | 1.87957000  | -2.07075000 | 3.76675500  |
| O | 1.40750400  | -4.30701900 | 3.66972600  |
| H | -1.25295700 | 0.96848300  | 6.23963600  |
| C | -1.20547100 | 1.25930400  | 5.18531800  |
| H | -2.19069700 | 1.59942700  | 4.81252800  |
| O | -0.25965200 | 2.30026100  | 5.02040600  |
| O | -0.76809800 | 0.15648000  | 4.40766500  |
| O | -5.47008200 | -3.34758200 | -3.55973300 |
| O | -5.03781600 | 3.02574600  | 3.15769800  |
| O | 5.52812400  | -4.31921800 | 1.05154600  |
| O | 5.81322300  | 4.35766500  | -2.09880400 |
| C | -6.22443400 | 2.99815500  | 2.38830900  |
| H | -6.85357400 | 3.82443500  | 2.73701200  |
| H | -6.00903300 | 3.12594200  | 1.31543000  |
| H | -6.77165800 | 2.05032300  | 2.51870500  |
| C | -2.78765900 | 4.19908500  | 1.75390000  |

|    |             |             |             |
|----|-------------|-------------|-------------|
| C  | -5.01655900 | 0.15023600  | 4.09394800  |
| C  | -6.62992400 | -2.08925000 | -1.25423000 |
| C  | -5.47919200 | -2.55860700 | -4.73256800 |
| H  | -6.38753300 | -2.81810000 | -5.28758000 |
| H  | -5.49340400 | -1.48545200 | -4.49085100 |
| H  | -4.60644400 | -2.76235000 | -5.36919700 |
| C  | -2.57125700 | -4.19297000 | -3.70072800 |
| C  | 5.89720600  | -1.78084900 | 2.67459600  |
| C  | 3.08264200  | -4.94707100 | -0.35276000 |
| C  | 6.64269200  | -4.14061400 | 0.20113900  |
| H  | 7.28261200  | -3.30793600 | 0.53026600  |
| H  | 7.22390700  | -5.06862700 | 0.23399500  |
| H  | 6.32916400  | -3.94253700 | -0.83464500 |
| C  | 6.77566600  | 1.51116500  | -2.00477700 |
| C  | 3.05647500  | 5.15342300  | -1.71573200 |
| C  | 6.75879100  | 4.84073200  | -1.16894900 |
| H  | 6.68110300  | 5.93410600  | -1.11152100 |
| H  | 6.58388000  | 4.42665100  | -0.16596400 |
| H  | 7.77824200  | 4.58541800  | -1.49226500 |
| Cu | -0.12080700 | 0.54460000  | -1.30302100 |
| C  | 1.67614700  | 5.34273600  | -1.07123800 |
| H  | 0.92014400  | 4.62562200  | -1.40979600 |
| H  | 1.73787000  | 5.26894800  | 0.02612000  |
| H  | 1.30277300  | 6.34739200  | -1.31588800 |
| C  | 3.93851200  | 6.28163100  | -1.16291000 |
| H  | 4.26358500  | 6.07526400  | -0.13232900 |
| H  | 4.81988800  | 6.45868700  | -1.78434600 |
| H  | 3.35984800  | 7.21567600  | -1.14307500 |
| C  | 2.93438600  | 5.32247700  | -3.23486400 |
| H  | 2.49905700  | 6.30300300  | -3.47952600 |
| H  | 3.91796400  | 5.25090400  | -3.71738500 |
| H  | 2.28634200  | 4.54614100  | -3.66460300 |
| C  | 7.26341400  | 2.19021800  | -3.29194500 |
| H  | 7.43742000  | 3.26251800  | -3.18081500 |
| H  | 8.20218600  | 1.72122200  | -3.61891500 |
| H  | 6.52514800  | 2.06248400  | -4.09608900 |
| C  | 6.71158600  | 0.00879200  | -2.32991200 |
| H  | 6.54555300  | -0.61892500 | -1.44273100 |
| H  | 5.92362100  | -0.21597400 | -3.06178300 |
| H  | 7.67127300  | -0.30485600 | -2.76271200 |
| C  | 7.81941400  | 1.66378000  | -0.89065500 |
| H  | 7.49376100  | 1.14114800  | 0.01965800  |
| H  | 8.77377000  | 1.21843500  | -1.20875200 |
| H  | 8.01652600  | 2.70648500  | -0.62389400 |

|   |             |             |             |
|---|-------------|-------------|-------------|
| C | 5.26694200  | -1.03605900 | 3.86576700  |
| H | 4.79145500  | -0.08799200 | 3.59139100  |
| H | 4.50679000  | -1.64891800 | 4.36707100  |
| H | 6.04856800  | -0.80380800 | 4.60213400  |
| C | 6.59046500  | -3.00724700 | 3.27934500  |
| H | 7.25882700  | -3.52503500 | 2.58659000  |
| H | 7.20311200  | -2.67591800 | 4.12977600  |
| H | 5.86634800  | -3.74213300 | 3.65415300  |
| C | 6.95092200  | -0.85680400 | 2.04927900  |
| H | 7.45618500  | -1.32641000 | 1.19278800  |
| H | 6.49138600  | 0.07650400  | 1.69131900  |
| H | 7.72055200  | -0.59382000 | 2.78952700  |
| C | 2.99058900  | -5.89434700 | 0.85194000  |
| H | 2.24919100  | -5.53444000 | 1.57843500  |
| H | 2.67969600  | -6.89557500 | 0.51905900  |
| H | 3.95460200  | -5.98818500 | 1.36422800  |
| C | 1.71030800  | -4.94676200 | -1.03707000 |
| H | 0.90898400  | -4.57928500 | -0.37649000 |
| H | 1.70693500  | -4.34469700 | -1.95950300 |
| H | 1.45411200  | -5.97636000 | -1.32416200 |
| C | 4.08482300  | -5.51153800 | -1.36774500 |
| H | 4.25915200  | -4.80535500 | -2.19307000 |
| H | 5.04700700  | -5.75475500 | -0.90699400 |
| H | 3.68708500  | -6.43982500 | -1.80240600 |
| C | -1.90867900 | -3.47943600 | -4.88588400 |
| H | -2.63318200 | -2.92680200 | -5.49767000 |
| H | -1.14547800 | -2.76061200 | -4.55817700 |
| H | -1.41451200 | -4.21355200 | -5.53870200 |
| C | -1.47993300 | -4.97812800 | -2.95003700 |
| H | -0.62765700 | -4.35708500 | -2.64852200 |
| H | -1.88338200 | -5.45554000 | -2.04516900 |
| H | -1.07979600 | -5.76785000 | -3.60066500 |
| C | -3.54767400 | -5.25051500 | -4.23062900 |
| H | -4.28291600 | -4.85658900 | -4.93690500 |
| H | -2.97278200 | -6.02683100 | -4.75493500 |
| H | -4.09726000 | -5.73377200 | -3.41212000 |
| C | -7.21871400 | -3.50344200 | -1.14707600 |
| H | -8.29509600 | -3.44436600 | -0.92918800 |
| H | -7.08757700 | -4.06892200 | -2.07401800 |
| H | -6.74083900 | -4.06038800 | -0.32872200 |
| C | -7.37035500 | -1.30486700 | -2.34584100 |
| H | -7.41487700 | -1.85257500 | -3.29161900 |
| H | -8.40697800 | -1.12489900 | -2.02616000 |
| H | -6.90368300 | -0.32538600 | -2.52785800 |

|   |             |             |             |
|---|-------------|-------------|-------------|
| C | -6.92425900 | -1.39392400 | 0.07709400  |
| H | -6.44615900 | -1.91382600 | 0.91741100  |
| H | -6.60362800 | -0.34019200 | 0.10155500  |
| H | -8.00795700 | -1.40753300 | 0.25601900  |
| C | -4.11608000 | -0.74136400 | 4.96695300  |
| H | -3.53050100 | -1.46943600 | 4.39439000  |
| H | -3.41101000 | -0.13699600 | 5.55270800  |
| H | -4.73872500 | -1.29972700 | 5.68023100  |
| C | -5.67943200 | 1.13853400  | 5.06044800  |
| H | -6.49983300 | 1.70430600  | 4.60841700  |
| H | -6.09920400 | 0.56882100  | 5.90222900  |
| H | -4.96068500 | 1.86156300  | 5.46651300  |
| C | -6.10576100 | -0.73924300 | 3.48484400  |
| H | -6.77639700 | -0.17022600 | 2.82601000  |
| H | -5.67025600 | -1.55831300 | 2.89535500  |
| H | -6.71769300 | -1.19040400 | 4.27956600  |
| C | -2.53023000 | 4.70359700  | 3.18094000  |
| H | -1.68219100 | 4.17183300  | 3.63805700  |
| H | -2.28005100 | 5.77454100  | 3.15845600  |
| H | -3.40887100 | 4.57117500  | 3.82329500  |
| C | -3.92170200 | 5.00931600  | 1.11661800  |
| H | -4.81719200 | 5.03775700  | 1.74685500  |
| H | -3.59068700 | 6.04764800  | 0.96791700  |
| H | -4.18721500 | 4.59842400  | 0.13156800  |
| C | -1.52205800 | 4.47048400  | 0.93164700  |
| H | -0.64517200 | 3.93426100  | 1.32799800  |
| H | -1.62385600 | 4.18191700  | -0.12401800 |
| H | -1.29972800 | 5.54683100  | 0.97086000  |
| C | 0.64244300  | 0.01699200  | -3.51214000 |
| C | -0.64930800 | 0.40549200  | -3.67199700 |
| C | -0.99318600 | 1.81673400  | -4.01413700 |
| H | -1.44198900 | -0.34997700 | -3.61518400 |
| H | -0.12549400 | 2.23509700  | -4.54651600 |
| H | -1.84108800 | 1.84483700  | -4.71494600 |
| C | 1.12231700  | -1.34737700 | -3.36826200 |
| C | 2.41874900  | -1.67767800 | -3.39544200 |
| H | 0.36632000  | -2.13130600 | -3.25602900 |
| H | 2.75505100  | -2.70990800 | -3.31222000 |
| H | 3.19047700  | -0.91205600 | -3.49436800 |
| C | -1.28041900 | 2.79745100  | -2.79867600 |
| C | -2.79632100 | 2.80567000  | -2.51316900 |
| C | -3.60752500 | 3.93393200  | -2.67613300 |
| C | -3.41343000 | 1.64815900  | -2.03093800 |
| C | -4.96452100 | 3.91349400  | -2.35574900 |

|   |             |            |             |
|---|-------------|------------|-------------|
| H | -3.18616400 | 4.86165300 | -3.05748800 |
| C | -4.75968000 | 1.62278600 | -1.69191700 |
| H | -2.81293900 | 0.74748500 | -1.90704900 |
| C | -5.54959600 | 2.75847900 | -1.85070900 |
| H | -5.56159000 | 4.81436900 | -2.49640000 |
| H | -5.18961700 | 0.70329100 | -1.29629300 |
| H | -6.60845900 | 2.73584700 | -1.59140100 |
| C | -0.83721100 | 4.17590400 | -3.30356300 |
| H | -1.32261900 | 4.46159900 | -4.24932300 |
| H | -1.03263500 | 4.95521300 | -2.55440300 |
| H | 0.24599800  | 4.14128900 | -3.47358500 |
| O | -0.55958400 | 2.46028600 | -1.68149200 |
| H | 1.42015700  | 0.78363700 | -3.61689500 |

**(Z)-(S)-TS3**

|   |             |             |             |
|---|-------------|-------------|-------------|
| P | 1.95146500  | 0.00807400  | 0.10347300  |
| C | 1.47928900  | -0.08468800 | 1.88703100  |
| C | 3.16839900  | 1.36836700  | 0.00296800  |
| C | 2.97321600  | -1.50576300 | -0.02110200 |
| C | 0.60266800  | -1.13127400 | 2.28563600  |
| C | 1.89652800  | 0.86677100  | 2.81804100  |
| C | 2.76392800  | 2.65305300  | 0.35219400  |
| C | 4.46270300  | 1.18239300  | -0.47183600 |
| C | 4.02227200  | -1.69950400 | 0.86857000  |
| C | 2.65865700  | -2.51781200 | -0.92299200 |
| C | 0.20890600  | -2.34404700 | 1.51395800  |
| C | 0.16027800  | -1.08059400 | 3.59289200  |
| C | 1.45313100  | 0.87471300  | 4.14897300  |
| H | 2.59612100  | 1.63893700  | 2.50693600  |
| C | 3.63072000  | 3.74863200  | 0.33144200  |
| H | 1.73889100  | 2.79399100  | 0.69591000  |
| C | 5.35243300  | 2.24553000  | -0.62239600 |
| H | 4.77624800  | 0.17767400  | -0.73677800 |
| C | 4.83924400  | -2.83020800 | 0.83244700  |
| H | 4.20505500  | -0.93296600 | 1.62114300  |
| C | 3.44441000  | -3.66505800 | -1.03938300 |
| H | 1.76570600  | -2.40124000 | -1.53006400 |
| C | -0.90245300 | -2.44380400 | 0.63310600  |
| C | 0.84478600  | -3.52924400 | 1.82643000  |
| C | 0.55792900  | -0.10538000 | 4.49946600  |
| H | 1.78884800  | 1.62658100  | 4.85972100  |
| C | 4.90673100  | 3.53253400  | -0.23904900 |
| C | 4.59159300  | -3.74536800 | -0.21480500 |
| P | -1.60156400 | -0.84775400 | 0.03109300  |

|   |             |             |             |
|---|-------------|-------------|-------------|
| C | -1.32881800 | -3.69587000 | 0.18764600  |
| C | 0.42939200  | -4.76432900 | 1.34416900  |
| C | -2.99077600 | -1.27671400 | -1.08114000 |
| C | -2.48022800 | -0.23150800 | 1.52063900  |
| C | -0.67374000 | -4.88668300 | 0.53602900  |
| H | -2.20935600 | -3.76550600 | -0.44651300 |
| C | -4.13308000 | -0.48679000 | -1.07433200 |
| C | -2.83120000 | -2.18597100 | -2.13057600 |
| C | -3.44304000 | -1.03442500 | 2.11633400  |
| C | -2.17710500 | 1.00220400  | 2.09622300  |
| H | -1.02203700 | -5.85562400 | 0.18670200  |
| C | -5.15554400 | -0.63157500 | -2.01945900 |
| H | -4.22623700 | 0.28877100  | -0.31359800 |
| C | -3.83092800 | -2.43254900 | -3.06584700 |
| H | -1.88714800 | -2.71103100 | -2.22676500 |
| C | -4.19008200 | -0.61909100 | 3.21950500  |
| H | -3.62268300 | -2.02122000 | 1.69022800  |
| C | -2.89302900 | 1.49508600  | 3.19143600  |
| H | -1.36548700 | 1.58772200  | 1.66550800  |
| C | -5.03213800 | -1.69729800 | -2.93067400 |
| C | -3.96471700 | 0.70080900  | 3.66428900  |
| C | -1.06625400 | -1.27538500 | 5.40424500  |
| H | -2.01888300 | -0.73845000 | 5.22223300  |
| H | -1.15658500 | -1.99264100 | 6.22499200  |
| O | -0.68389900 | -1.95267700 | 4.21924500  |
| O | -0.04434000 | -0.33582500 | 5.70197900  |
| H | 2.61381100  | -5.51661100 | 3.36562000  |
| C | 2.33245600  | -5.04714700 | 2.41737200  |
| H | 3.17654200  | -5.04663100 | 1.70025900  |
| O | 1.23468600  | -5.74263300 | 1.84951200  |
| O | 1.91694600  | -3.71070400 | 2.65261200  |
| O | 5.79463100  | 4.57062400  | -0.39939200 |
| O | 5.47738700  | -4.77153400 | -0.45519300 |
| O | -4.80622600 | 1.25792300  | 4.60077600  |
| O | -6.09278400 | -2.04083700 | -3.73850500 |
| C | 6.62199400  | -4.34881400 | -1.16932400 |
| H | 7.18792900  | -5.24979300 | -1.42959600 |
| H | 6.34477300  | -3.81334200 | -2.08962900 |
| H | 7.26157800  | -3.68652200 | -0.56649500 |
| C | 3.03121400  | -4.79987300 | -1.99137200 |
| C | 5.88671800  | -2.96609600 | 1.95607500  |
| C | 6.78438900  | 1.97185700  | -1.11014000 |
| C | 5.53919500  | 5.47860800  | -1.45346600 |
| H | 5.13001200  | 6.42443900  | -1.07027900 |



|    |             |             |             |
|----|-------------|-------------|-------------|
| H  | 6.48983200  | 5.69801200  | -1.95554800 |
| H  | 4.83347000  | 5.05567800  | -2.18317500 |
| C  | 3.13468500  | 5.07342300  | 0.94494800  |
| C  | -5.15473500 | -1.64952800 | 3.83433300  |
| C  | -2.46970200 | 2.79221300  | 3.90742900  |
| C  | -6.00383000 | 1.74510600  | 4.03069100  |
| H  | -6.62531000 | 0.93359000  | 3.62180800  |
| H  | -6.55632400 | 2.24970500  | 4.83076900  |
| H  | -5.79935700 | 2.46320400  | 3.22176900  |
| C  | -6.26109500 | 0.44088000  | -2.00202000 |
| C  | -3.56439200 | -3.37568700 | -4.24916500 |
| C  | -7.06320900 | -2.81279300 | -3.06474100 |
| H  | -7.87030200 | -3.00628200 | -3.77970700 |
| H  | -6.64606300 | -3.77096600 | -2.71818900 |
| H  | -7.47493900 | -2.28416100 | -2.19119300 |
| Cu | 0.10282600  | 0.32946900  | -1.24849900 |
| C  | -1.01994000 | 3.23198700  | -2.10424700 |
| O  | -1.04751700 | 1.84373500  | -1.99350300 |
| C  | -2.14479500 | -3.95221300 | -4.19833500 |
| H  | -1.37328200 | -3.16896600 | -4.22896800 |
| H  | -1.97744400 | -4.57559700 | -3.30576100 |
| H  | -1.99002900 | -4.59269800 | -5.07686600 |
| C  | -4.52715100 | -4.56889800 | -4.28172300 |
| H  | -4.53984500 | -5.09825200 | -3.31715700 |
| H  | -5.54845100 | -4.26892200 | -4.53371700 |
| H  | -4.19824400 | -5.28521600 | -5.04821500 |
| C  | -3.68547400 | -2.58029200 | -5.55697200 |
| H  | -3.47081200 | -3.23750400 | -6.41266500 |
| H  | -4.69294600 | -2.16942700 | -5.68832100 |
| H  | -2.97015400 | -1.74496400 | -5.58296900 |
| C  | -7.24596600 | 0.40745900  | -3.17552600 |
| H  | -7.92619700 | -0.44974000 | -3.15764200 |
| H  | -7.86874500 | 1.31217000  | -3.12591800 |
| H  | -6.72616300 | 0.41054000  | -4.14121800 |
| C  | -5.56558300 | 1.81139800  | -2.09562500 |
| H  | -4.88731900 | 2.01463600  | -1.25811400 |
| H  | -4.97494300 | 1.87732300  | -3.02163500 |
| H  | -6.31648800 | 2.61430100  | -2.11083400 |
| C  | -7.05276500 | 0.36294500  | -0.69030900 |
| H  | -6.40533500 | 0.47058600  | 0.19288900  |
| H  | -7.80384600 | 1.16551400  | -0.65448500 |
| H  | -7.58318200 | -0.59616600 | -0.59593300 |
| C  | -4.40366600 | -2.98339000 | 4.00724800  |
| H  | -4.04240300 | -3.40984200 | 3.06446600  |

|   |             |             |             |
|---|-------------|-------------|-------------|
| H | -3.53264000 | -2.86298900 | 4.66670500  |
| H | -5.07317700 | -3.72581600 | 4.46320100  |
| C | -5.68562900 | -1.29634900 | 5.22847900  |
| H | -6.40541300 | -0.47308200 | 5.23017900  |
| H | -6.20081800 | -2.17641200 | 5.63908200  |
| H | -4.87147300 | -1.02986500 | 5.91535000  |
| C | -6.33751700 | -1.87611400 | 2.88377200  |
| H | -6.93282800 | -0.96140700 | 2.75274100  |
| H | -5.99902700 | -2.19343800 | 1.88706600  |
| H | -7.00496900 | -2.65496700 | 3.28087900  |
| C | -2.11744600 | 2.45914700  | 5.36446400  |
| H | -1.28378300 | 1.74627000  | 5.42051000  |
| H | -1.80898900 | 3.37528300  | 5.88947600  |
| H | -2.97430500 | 2.03518600  | 5.90163000  |
| C | -1.22483300 | 3.40531400  | 3.25989000  |
| H | -0.37389200 | 2.70860300  | 3.23952000  |
| H | -1.43081500 | 3.74617600  | 2.23507400  |
| H | -0.91463000 | 4.28305100  | 3.84404100  |
| C | -3.54939600 | 3.88306200  | 3.90022100  |
| H | -3.90849100 | 4.08742300  | 2.88316800  |
| H | -4.39874200 | 3.62792700  | 4.54089000  |
| H | -3.11917300 | 4.81963300  | 4.28313800  |
| C | 2.09528200  | 4.79804100  | 2.04788500  |
| H | 1.14778000  | 4.40299000  | 1.65849000  |
| H | 2.47554800  | 4.09951400  | 2.80814200  |
| H | 1.85152300  | 5.74127100  | 2.55517700  |
| C | 4.25538700  | 5.86168600  | 1.63507000  |
| H | 4.76123200  | 5.23800000  | 2.38562900  |
| H | 5.02226900  | 6.23565600  | 0.95530900  |
| H | 3.81873000  | 6.72528300  | 2.15568700  |
| C | 2.42652200  | 5.92593700  | -0.11456900 |
| H | 1.58412800  | 5.37180200  | -0.55324400 |
| H | 2.03179600  | 6.84520500  | 0.34335800  |
| H | 3.07998700  | 6.21572400  | -0.94434000 |
| C | 7.77422800  | 2.31334300  | 0.01133000  |
| H | 8.80494200  | 2.12310400  | -0.32303400 |
| H | 7.69596400  | 3.36511800  | 0.30767700  |
| H | 7.58671300  | 1.68860400  | 0.89680100  |
| C | 7.13296200  | 2.77542000  | -2.37013800 |
| H | 7.28520800  | 3.83594500  | -2.15667500 |
| H | 8.06820400  | 2.39434000  | -2.80468300 |
| H | 6.34772300  | 2.68006800  | -3.13464600 |
| C | 6.99019700  | 0.49583600  | -1.47217600 |
| H | 6.80376600  | -0.18244200 | -0.62731900 |

|   |             |             |             |
|---|-------------|-------------|-------------|
| H | 6.35028400  | 0.18385000  | -2.31034200 |
| H | 8.03404100  | 0.34975400  | -1.78115500 |
| C | 5.20899100  | -2.64004100 | 3.30132400  |
| H | 4.88081700  | -1.59671100 | 3.38026000  |
| H | 4.32489600  | -3.26946400 | 3.46737400  |
| H | 5.91855700  | -2.81531200 | 4.12150300  |
| C | 6.48506600  | -4.36798300 | 2.12096900  |
| H | 7.13792300  | -4.66959500 | 1.29776200  |
| H | 7.09083400  | -4.38321800 | 3.03793000  |
| H | 5.70521000  | -5.13427600 | 2.22348200  |
| C | 7.02086700  | -1.95586300 | 1.74065400  |
| H | 7.58191400  | -2.15496600 | 0.81661400  |
| H | 6.63337000  | -0.92748400 | 1.68144200  |
| H | 7.73279700  | -1.99794200 | 2.57786600  |
| C | 2.89540500  | -6.11406500 | -1.20934900 |
| H | 2.10624700  | -6.04302600 | -0.44669000 |
| H | 2.61878400  | -6.92630200 | -1.89744200 |
| H | 3.83291100  | -6.39301500 | -0.71511400 |
| C | 4.03477700  | -4.98884400 | -3.13612600 |
| H | 4.98293400  | -5.41127700 | -2.79011000 |
| H | 3.61853700  | -5.68496500 | -3.87836000 |
| H | 4.23500300  | -4.03692500 | -3.64915600 |
| C | 1.67150200  | -4.51627500 | -2.63907400 |
| H | 0.87951500  | -4.35420000 | -1.89229900 |
| H | 1.69774100  | -3.64370800 | -3.30794500 |
| H | 1.37843400  | -5.38370100 | -3.24611000 |
| C | -1.48815800 | 0.39658900  | -4.12173700 |
| C | -1.95512400 | 1.08103200  | -5.32890400 |
| H | -1.35327200 | 1.27114700  | -3.12679100 |
| C | -3.22522200 | 1.14555300  | -5.74764300 |
| H | -1.18492000 | 1.61688600  | -5.89853000 |
| H | -3.51584100 | 1.71456600  | -6.62802600 |
| H | -4.02130500 | 0.61707200  | -5.21542000 |
| C | -0.12263400 | -0.03853300 | -4.03916100 |
| H | 0.58411000  | 0.56564800  | -4.62441000 |
| C | 0.42686300  | -0.94704100 | -3.17357600 |
| H | -0.18618200 | -1.72043200 | -2.70292900 |
| H | 1.50011000  | -1.13562200 | -3.20463200 |
| H | -2.22727600 | -0.28582000 | -3.67795000 |
| C | -3.55238900 | 4.20949800  | 0.30499000  |
| C | -2.57539400 | 3.41097100  | -0.15492500 |
| C | -1.24058600 | 3.80859200  | -0.68415400 |
| H | -4.48880600 | 3.73905600  | 0.62807200  |
| H | -2.76524400 | 2.33530000  | -0.20099600 |

|   |             |            |             |
|---|-------------|------------|-------------|
| H | -1.10397300 | 4.90092000 | -0.68340900 |
| H | -0.43881200 | 3.38177700 | -0.05069200 |
| C | -3.50225200 | 5.65364400 | 0.43877400  |
| C | -4.50042200 | 6.38666000 | 0.94530900  |
| H | -2.59081700 | 6.15785500 | 0.10940000  |
| H | -4.43541400 | 7.46837400 | 1.03566700  |
| H | -5.42545900 | 5.92092600 | 1.28897700  |
| C | 0.30048700  | 3.76991000 | -2.66680200 |
| C | 1.42538400  | 2.95688200 | -2.80967900 |
| C | 0.40850000  | 5.10747300 | -3.07100300 |
| C | 2.60899900  | 3.45094900 | -3.35515800 |
| H | 1.37258900  | 1.91071700 | -2.50574300 |
| C | 1.58248900  | 5.60463700 | -3.62366000 |
| H | -0.44726200 | 5.77474300 | -2.96583900 |
| C | 2.68915900  | 4.77326200 | -3.77808300 |
| H | 3.47023700  | 2.78893900 | -3.45550900 |
| H | 1.62927400  | 6.64452900 | -3.94534100 |
| H | 3.60381800  | 5.15307900 | -4.23397800 |
| C | -2.17430500 | 3.68015800 | -3.01427000 |
| H | -3.08599300 | 3.14240400 | -2.72601100 |
| H | -2.37783200 | 4.75687700 | -2.92911000 |
| H | -1.96375700 | 3.44797900 | -4.06546800 |

**(E)-(S)-TS3**

|   |            |             |             |
|---|------------|-------------|-------------|
| P | 1.95088000 | 0.07620700  | 0.10433500  |
| C | 1.53566000 | 0.11326200  | 1.89946800  |
| C | 3.13307600 | 1.45135400  | -0.14502200 |
| C | 3.01638000 | -1.41525100 | 0.08076900  |
| C | 0.67027500 | -0.90122800 | 2.39377000  |
| C | 2.00700400 | 1.10994300  | 2.75394700  |
| C | 2.71474600 | 2.75305800  | 0.10631800  |
| C | 4.41897100 | 1.24868400  | -0.64219300 |
| C | 4.08036800 | -1.50627100 | 0.96924000  |
| C | 2.73488300 | -2.49919800 | -0.74498200 |
| C | 0.26941100 | -2.16665300 | 1.71265500  |
| C | 0.28977300 | -0.77057500 | 3.71460400  |
| C | 1.63141900 | 1.19422400  | 4.10233800  |
| H | 2.69729000 | 1.85676700  | 2.36681300  |
| C | 3.55106400 | 3.86040500  | -0.06789900 |
| H | 1.70269200 | 2.91176100  | 0.48566400  |
| C | 5.27938700 | 2.30856300  | -0.92421200 |
| H | 4.74817300 | 0.23001200  | -0.81796300 |
| C | 4.93972600 | -2.60530500 | 1.00128200  |
| H | 4.23878600 | -0.68755200 | 1.67062700  |

|   |             |             |             |
|---|-------------|-------------|-------------|
| C | 3.56681700  | -3.61787200 | -0.79657600 |
| H | 1.83319200  | -2.45971700 | -1.34868100 |
| C | -0.85656600 | -2.36135600 | 0.86316700  |
| C | 0.95324500  | -3.30951300 | 2.08015000  |
| C | 0.74319300  | 0.24663300  | 4.54658100  |
| H | 2.00615800  | 1.98100000  | 4.75307600  |
| C | 4.80165100  | 3.61756900  | -0.67493100 |
| C | 4.72505300  | -3.59406500 | 0.01644100  |
| P | -1.60490100 | -0.84677900 | 0.12499900  |
| C | -1.24098400 | -3.65398900 | 0.50311800  |
| C | 0.57889200  | -4.58632100 | 1.68011900  |
| C | -2.97751100 | -1.41276000 | -0.94562900 |
| C | -2.44249100 | -0.06839100 | 1.55920100  |
| C | -0.53441000 | -4.79743200 | 0.90497800  |
| H | -2.12559400 | -3.79421700 | -0.11411600 |
| C | -4.19302100 | -0.73644900 | -0.96121600 |
| C | -2.73323100 | -2.34517200 | -1.95267800 |
| C | -3.41400200 | -0.76408300 | 2.26446900  |
| C | -2.05149600 | 1.19188900  | 2.01318600  |
| H | -0.85089800 | -5.79758600 | 0.61928300  |
| C | -5.17631500 | -0.98136800 | -1.92431800 |
| H | -4.36288100 | 0.02449400  | -0.20460200 |
| C | -3.67226500 | -2.66999500 | -2.93081500 |
| H | -1.75566000 | -2.81365100 | -2.00028900 |
| C | -4.07268700 | -0.21886400 | 3.36874200  |
| H | -3.66485800 | -1.77297600 | 1.93683400  |
| C | -2.67869900 | 1.81641200  | 3.09482200  |
| H | -1.23558500 | 1.68496100  | 1.48585700  |
| C | -4.91217700 | -1.98988400 | -2.88105200 |
| C | -3.75383800 | 1.11668600  | 3.69692800  |
| C | -0.85595700 | -0.84283300 | 5.58550000  |
| H | -1.80770000 | -0.29937900 | 5.41404800  |
| H | -0.92225500 | -1.50906700 | 6.45017700  |
| O | -0.53490900 | -1.59343100 | 4.42762700  |
| O | 0.19229300  | 0.09284200  | 5.78560000  |
| H | 2.82626500  | -5.13117200 | 3.69829300  |
| C | 2.51282500  | -4.73170400 | 2.72788500  |
| H | 3.34702200  | -4.74331700 | 1.99902800  |
| O | 1.43362000  | -5.50094300 | 2.22238200  |
| O | 2.05014000  | -3.39978100 | 2.88851200  |
| O | 5.61525900  | 4.67341700  | -1.01506800 |
| O | 5.65382100  | -4.59407800 | -0.16374100 |
| O | -4.49297800 | 1.77334800  | 4.65242500  |
| O | -5.83946600 | -2.23200200 | -3.86650100 |

|    |             |             |             |
|----|-------------|-------------|-------------|
| C  | 6.78068500  | -4.16561000 | -0.90234100 |
| H  | 7.41986400  | -5.04303500 | -1.04685400 |
| H  | 6.48603800  | -3.76331600 | -1.88338100 |
| H  | 7.35099500  | -3.38904200 | -0.37025200 |
| C  | 3.19378100  | -4.82973300 | -1.66501000 |
| C  | 5.98834100  | -2.63364200 | 2.13215100  |
| C  | 6.72450000  | 2.01893700  | -1.36527100 |
| C  | 5.22076300  | 5.34626000  | -2.19476200 |
| H  | 4.14607900  | 5.57671900  | -2.19681000 |
| H  | 5.79693000  | 6.27698200  | -2.23970500 |
| H  | 5.43967000  | 4.74416300  | -3.09013700 |
| C  | 3.02521500  | 5.20638200  | 0.47481600  |
| C  | -5.04658000 | -1.15015400 | 4.11670500  |
| C  | -2.15871300 | 3.15307700  | 3.65792300  |
| C  | -5.71708800 | 2.28270000  | 4.15703700  |
| H  | -6.33754400 | 1.49072100  | 3.70970200  |
| H  | -6.24880000 | 2.71567900  | 5.01135200  |
| H  | -5.55247400 | 3.06228200  | 3.39812300  |
| C  | -6.47533500 | -0.15589300 | -1.88560600 |
| C  | -3.30377100 | -3.71830600 | -3.99718500 |
| C  | -6.84131500 | -3.20299000 | -3.68333500 |
| H  | -6.76167200 | -3.96436000 | -4.47285300 |
| H  | -6.76170000 | -3.69435500 | -2.70295300 |
| H  | -7.83117500 | -2.73113200 | -3.76937100 |
| Cu | 0.06269300  | 0.25966100  | -1.24127800 |
| C  | -1.33981000 | 2.97839500  | -2.34226900 |
| O  | -1.24575800 | 1.61134100  | -2.07931400 |
| C  | -0.07036400 | 3.56080800  | -2.97615600 |
| C  | 1.15267800  | 2.89412200  | -2.89778800 |
| C  | -0.09125200 | 4.80780800  | -3.61331400 |
| C  | 2.31341000  | 3.44128800  | -3.43826400 |
| H  | 1.20159400  | 1.92006400  | -2.40990200 |
| C  | 1.06020500  | 5.35548200  | -4.16749400 |
| H  | -1.02768900 | 5.36075000  | -3.68589000 |
| C  | 2.27112000  | 4.67182700  | -4.08505200 |
| H  | 3.25649000  | 2.90035400  | -3.33588300 |
| H  | 1.00952200  | 6.31992700  | -4.67188000 |
| H  | 3.17232500  | 5.09547300  | -4.52852200 |
| C  | -2.55205200 | 3.22516500  | -3.25259900 |
| H  | -2.34310400 | 2.93571000  | -4.28939500 |
| H  | -3.38824400 | 2.60896400  | -2.89629900 |
| H  | -2.87820100 | 4.27465600  | -3.23951500 |
| C  | -1.80698000 | -4.05837800 | -3.97177800 |
| H  | -1.17406600 | -3.17683200 | -4.14561500 |

|   |             |             |             |
|---|-------------|-------------|-------------|
| H | -1.49586700 | -4.53646300 | -3.03013100 |
| H | -1.59680500 | -4.77708700 | -4.77525800 |
| C | -4.04044500 | -5.03321300 | -3.70909700 |
| H | -3.80358800 | -5.39364300 | -2.69697200 |
| H | -5.12744500 | -4.94210700 | -3.78833200 |
| H | -3.72119400 | -5.80514200 | -4.42454400 |
| C | -3.60599700 | -3.22575900 | -5.41871900 |
| H | -3.27769300 | -3.98402100 | -6.14422900 |
| H | -4.66917000 | -3.02998300 | -5.58148700 |
| H | -3.05794500 | -2.29674500 | -5.63628500 |
| C | -6.85398900 | 0.38720300  | -3.27029400 |
| H | -7.08424600 | -0.40139400 | -3.99082000 |
| H | -7.73083400 | 1.04400400  | -3.17962700 |
| H | -6.02851200 | 0.98357800  | -3.68480200 |
| C | -6.32814100 | 1.06815200  | -0.97457000 |
| H | -6.19246700 | 0.78996900  | 0.08245900  |
| H | -5.48835300 | 1.71067900  | -1.27393900 |
| H | -7.24180700 | 1.67593300  | -1.02826100 |
| C | -7.62064000 | -0.98567100 | -1.29062700 |
| H | -7.35415400 | -1.34219600 | -0.28477700 |
| H | -8.52213500 | -0.36240700 | -1.19760100 |
| H | -7.88771400 | -1.85777700 | -1.89440200 |
| C | -4.34220600 | -2.50005600 | 4.35514300  |
| H | -4.08513900 | -3.03032600 | 3.43100600  |
| H | -3.41130600 | -2.36403500 | 4.92383100  |
| H | -4.99997100 | -3.16212500 | 4.93503600  |
| C | -5.48861700 | -0.67025100 | 5.50356000  |
| H | -6.15856800 | 0.19346300  | 5.47813600  |
| H | -6.03294600 | -1.48768800 | 5.99752200  |
| H | -4.62874200 | -0.40786500 | 6.13364100  |
| C | -6.28676500 | -1.39570100 | 3.24734200  |
| H | -6.87090900 | -0.47544500 | 3.10628900  |
| H | -6.01173700 | -1.76811500 | 2.24990100  |
| H | -6.94579700 | -2.13900900 | 3.71939500  |
| C | -1.69593900 | 2.92856900  | 5.10406200  |
| H | -0.89814600 | 2.17848100  | 5.15726600  |
| H | -1.30195600 | 3.86820100  | 5.51890000  |
| H | -2.52375400 | 2.59831100  | 5.74252700  |
| C | -0.95879700 | 3.66716100  | 2.85468200  |
| H | -0.14003100 | 2.93446200  | 2.81158000  |
| H | -1.24192300 | 3.94410100  | 1.82701400  |
| H | -0.56493500 | 4.57031300  | 3.34162300  |
| C | -3.19787900 | 4.28208200  | 3.65822700  |
| H | -3.67044700 | 4.40344900  | 2.67573900  |

|   |             |             |             |
|---|-------------|-------------|-------------|
| H | -3.97618800 | 4.12798400  | 4.41151500  |
| H | -2.69458900 | 5.22853300  | 3.90341700  |
| C | 2.54931600  | 4.98090000  | 1.92353300  |
| H | 1.73845200  | 4.24732500  | 2.00618000  |
| H | 3.38054000  | 4.64240100  | 2.55970500  |
| H | 2.16933000  | 5.92504900  | 2.33870900  |
| C | 4.05429700  | 6.33954700  | 0.56921100  |
| H | 4.96847400  | 6.02170500  | 1.08481500  |
| H | 4.33853600  | 6.75931800  | -0.39980600 |
| H | 3.60703900  | 7.15995400  | 1.14805200  |
| C | 1.83062100  | 5.68036100  | -0.36263200 |
| H | 1.00414200  | 4.95575200  | -0.34136700 |
| H | 1.44981100  | 6.63340800  | 0.03330200  |
| H | 2.09472500  | 5.83034300  | -1.41966400 |
| C | 7.67524700  | 2.48941100  | -0.25618500 |
| H | 8.71851100  | 2.28692800  | -0.54039100 |
| H | 7.57315900  | 3.56434000  | -0.06975200 |
| H | 7.47122700  | 1.95391800  | 0.68232300  |
| C | 7.10256400  | 2.70522300  | -2.68415200 |
| H | 7.22385900  | 3.78514700  | -2.56613300 |
| H | 8.06142000  | 2.30760600  | -3.04656200 |
| H | 6.35061600  | 2.51415800  | -3.46418900 |
| C | 6.96379800  | 0.51880200  | -1.57359700 |
| H | 6.77727800  | -0.07278600 | -0.66606800 |
| H | 6.34125400  | 0.11087100  | -2.38301600 |
| H | 8.01458800  | 0.36168700  | -1.85201900 |
| C | 5.28822900  | -2.26462100 | 3.45518300  |
| H | 4.89626500  | -1.24040000 | 3.46887900  |
| H | 4.44306800  | -2.93381500 | 3.66355400  |
| H | 6.00512700  | -2.34571000 | 4.28381900  |
| C | 6.64566700  | -3.99708500 | 2.37533200  |
| H | 7.32558400  | -4.30788700 | 1.57739100  |
| H | 7.23664800  | -3.93930800 | 3.30028200  |
| H | 5.89873200  | -4.79173600 | 2.50385600  |
| C | 7.07891600  | -1.58750300 | 1.86897200  |
| H | 7.65978000  | -1.81253800 | 0.96323200  |
| H | 6.64694800  | -0.58284700 | 1.74885200  |
| H | 7.78192700  | -1.55137700 | 2.71381500  |
| C | 3.12653200  | -6.09395600 | -0.79647400 |
| H | 2.34028200  | -6.01032200 | -0.03181800 |
| H | 2.88478400  | -6.96287900 | -1.42588300 |
| H | 4.08048600  | -6.29332800 | -0.29524100 |
| C | 4.19597600  | -5.04683800 | -2.80577800 |
| H | 5.16030900  | -5.41432000 | -2.44126500 |



|   |             |             |             |
|---|-------------|-------------|-------------|
| H | 3.80251100  | -5.79741800 | -3.50620300 |
| H | 4.35911800  | -4.11795100 | -3.37139000 |
| C | 1.81536100  | -4.64816400 | -2.30800400 |
| H | 1.03026300  | -4.47302900 | -1.55674200 |
| H | 1.79401500  | -3.82068400 | -3.03195800 |
| H | 1.55082900  | -5.56437300 | -2.85364600 |
| C | -1.39610700 | 0.05255400  | -4.17889400 |
| C | -1.83934400 | 0.64037700  | -5.44514700 |
| H | -1.41183400 | 0.95711500  | -3.20335100 |
| C | -3.08594600 | 0.59221600  | -5.93111100 |
| H | -1.07591600 | 1.19806000  | -6.00287900 |
| H | -3.36359400 | 1.08883000  | -6.85846600 |
| H | -3.87727900 | 0.05209700  | -5.40401100 |
| C | -0.00736900 | -0.26191100 | -4.00045500 |
| H | 0.68348500  | 0.36784500  | -4.57695500 |
| C | 0.55856300  | -1.08294300 | -3.06136400 |
| H | -0.02258600 | -1.87880400 | -2.58601700 |
| H | 1.64287000  | -1.19043700 | -3.02917500 |
| H | -2.10092700 | -0.67729200 | -3.75529300 |
| C | -3.83805300 | 4.15560300  | -0.01312800 |
| C | -2.84895900 | 3.31387200  | -0.34805200 |
| C | -1.56752500 | 3.70157300  | -0.99373700 |
| H | -3.73376100 | 5.22754200  | -0.21393000 |
| H | -2.98711100 | 2.24380800  | -0.16385500 |
| H | -1.52429000 | 4.79504900  | -1.13126000 |
| H | -0.71600100 | 3.41802000  | -0.34491600 |
| C | -5.06642600 | 3.71419400  | 0.61926200  |
| C | -6.11954400 | 4.49317000  | 0.89393500  |
| H | -5.09960900 | 2.65170000  | 0.88738100  |
| H | -7.01798800 | 4.09705900  | 1.36395500  |
| H | -6.12302100 | 5.55433700  | 0.64351400  |

**(Z)-(S)-P<sub>t</sub>**

|   |             |             |             |
|---|-------------|-------------|-------------|
| C | -1.75095900 | -0.10253200 | 0.08006800  |
| O | -2.36115900 | -0.32959200 | -1.18381400 |
| C | 0.93937500  | -2.27531100 | -0.40792400 |
| C | -0.40028400 | -2.19889400 | -0.43149900 |
| C | -1.27232000 | -1.49005000 | 0.55397700  |
| H | 1.43732100  | -2.83145500 | -1.20708400 |
| H | -0.92593600 | -2.67145100 | -1.26179300 |
| H | -2.17487400 | -2.09362300 | 0.74016300  |
| H | -0.76918000 | -1.36077500 | 1.52286200  |
| C | 1.82807500  | -1.67492300 | 0.57017700  |
| C | 3.15990700  | -1.78453300 | 0.51659200  |

|   |             |             |             |
|---|-------------|-------------|-------------|
| H | 1.37796100  | -1.08651200 | 1.37259300  |
| H | 3.80762500  | -1.31495100 | 1.25323000  |
| H | 3.65018100  | -2.34775800 | -0.27838400 |
| H | -2.67086600 | 0.52700500  | -1.51305200 |
| C | -0.56062800 | 0.83693400  | -0.04438200 |
| C | 0.07890700  | 1.00205600  | -1.27375000 |
| C | -0.03250900 | 1.49125500  | 1.07264600  |
| C | 1.21544600  | 1.79672300  | -1.38489500 |
| H | -0.31422600 | 0.48086700  | -2.14439500 |
| C | 1.10422800  | 2.28481400  | 0.96446600  |
| H | -0.50510900 | 1.37403100  | 2.04821100  |
| C | 1.73397800  | 2.43952700  | -0.26655100 |
| H | 1.70184500  | 1.90771000  | -2.35309700 |
| H | 1.49933300  | 2.78470800  | 1.84779900  |
| H | 2.62576200  | 3.05829700  | -0.35179800 |
| C | -2.80810800 | 0.42943400  | 1.04274600  |
| H | -3.11603100 | 1.44672700  | 0.76187400  |
| H | -3.68732100 | -0.22526900 | 1.00154000  |
| H | -2.45785600 | 0.46218900  | 2.08181700  |

**(E)-(S)-P<sub>l</sub>**

|   |             |             |             |
|---|-------------|-------------|-------------|
| C | 1.04110500  | -1.42601000 | 0.04001900  |
| O | 0.98086400  | -1.94516800 | 1.36224000  |
| C | -2.35028200 | -0.41948400 | -0.43674200 |
| C | -1.49066900 | -1.29664600 | 0.09723700  |
| C | -0.29309600 | -1.83496500 | -0.60744200 |
| H | -2.18442200 | -0.06156900 | -1.45890500 |
| H | -1.64284000 | -1.63923500 | 1.12409100  |
| H | -0.31731300 | -2.93738400 | -0.61025900 |
| H | -0.29019900 | -1.50398300 | -1.65708800 |
| C | -3.51121100 | 0.10472600  | 0.25571800  |
| C | -4.37338700 | 0.97885900  | -0.27346400 |
| H | -3.66721000 | -0.25833400 | 1.27540400  |
| H | -5.23390200 | 1.34748200  | 0.27986700  |
| H | -4.24308600 | 1.35915100  | -1.28707700 |
| H | 1.82044500  | -1.73276600 | 1.79597700  |
| C | 1.18365000  | 0.08975400  | 0.04657500  |
| C | 0.97352000  | 0.82037600  | 1.21606300  |
| C | 1.48841600  | 0.78708600  | -1.12586500 |
| C | 1.09073900  | 2.20689400  | 1.22246900  |
| H | 0.69903000  | 0.29010700  | 2.12605100  |
| C | 1.60165600  | 2.17232500  | -1.12386500 |
| H | 1.63950300  | 0.24412000  | -2.05939100 |
| C | 1.40937200  | 2.88870200  | 0.05394700  |

|   |            |             |             |
|---|------------|-------------|-------------|
| H | 0.92373100 | 2.75671800  | 2.14772300  |
| H | 1.84348900 | 2.69510300  | -2.04827400 |
| H | 1.50125500 | 3.97354500  | 0.05740500  |
| C | 2.19930800 | -2.09656500 | -0.69274200 |
| H | 3.16089000 | -1.79637800 | -0.25220000 |
| H | 2.09895900 | -3.18562500 | -0.60381700 |
| H | 2.23002000 | -1.83992900 | -1.75887900 |

**(Z)-(S)-TS2'**

|   |             |             |             |
|---|-------------|-------------|-------------|
| C | -3.09735600 | -1.38362400 | 1.75423900  |
| C | -0.63789100 | -0.91590700 | 2.88378400  |
| C | -1.71529700 | -1.53881100 | 3.77107500  |
| C | -2.62441100 | -2.34601200 | 2.85365700  |
| H | -3.76015500 | -0.63944000 | 2.22914900  |
| H | 0.05128900  | -1.71628800 | 2.57276000  |
| H | -1.27155400 | -2.14530000 | 4.57336200  |
| H | -2.31791400 | -0.75550000 | 4.25745000  |
| H | -2.06288600 | -3.17931300 | 2.39823400  |
| H | -3.48116400 | -2.78853300 | 3.38104800  |
| C | 0.18872200  | 0.21710700  | 3.42408000  |
| C | 1.41257700  | 0.51206300  | 2.80563900  |
| C | -0.23524200 | 1.02657400  | 4.48045900  |
| C | 2.17963900  | 1.59185000  | 3.22595600  |
| H | 1.74921900  | -0.10416000 | 1.96807700  |
| C | 0.53401500  | 2.11010600  | 4.90064000  |
| H | -1.17407600 | 0.81475800  | 4.99264500  |
| C | 1.74054600  | 2.40017000  | 4.27334700  |
| H | 3.12422400  | 1.80065200  | 2.72398800  |
| H | 0.18671900  | 2.72686800  | 5.72860300  |
| H | 2.34136900  | 3.24609700  | 4.60464200  |
| C | -3.84210500 | -2.02369700 | 0.61760400  |
| C | -5.23414100 | -1.93048200 | 0.56154900  |
| C | -3.18109100 | -2.73108900 | -0.39071300 |
| C | -5.95076500 | -2.52352700 | -0.47318700 |
| H | -5.76078800 | -1.37422400 | 1.33896400  |
| C | -3.89118200 | -3.31861700 | -1.43144100 |
| H | -2.09112000 | -2.79069700 | -0.37381300 |
| C | -5.28023900 | -3.21680000 | -1.47668300 |
| H | -7.03617900 | -2.43698000 | -0.49963200 |
| H | -3.35505500 | -3.85301800 | -2.21530200 |
| H | -5.83621800 | -3.67621300 | -2.29226200 |
| P | -1.52787100 | -0.46430700 | 1.27451500  |
| C | -1.24918100 | 2.67410400  | -1.83811600 |
| C | 1.10021100  | 3.30559300  | -0.57055200 |

|    |             |             |             |
|----|-------------|-------------|-------------|
| C  | 0.68682100  | 4.14444600  | -1.79329500 |
| C  | -0.83213500 | 4.14110300  | -1.86587600 |
| H  | -0.89021000 | 2.19887500  | -2.76793400 |
| H  | 0.91517300  | 3.90322700  | 0.33806200  |
| H  | 1.11081900  | 5.15608100  | -1.72781500 |
| H  | 1.09862500  | 3.68239500  | -2.70476000 |
| H  | -1.23525900 | 4.67926500  | -0.99248400 |
| H  | -1.21285700 | 4.65282800  | -2.76184300 |
| C  | 2.54115400  | 2.88546300  | -0.58580800 |
| C  | 3.03369000  | 2.04833400  | -1.59151300 |
| C  | 3.43081800  | 3.36828100  | 0.37502300  |
| C  | 4.38315600  | 1.72063400  | -1.64428200 |
| H  | 2.34421000  | 1.64065900  | -2.33418700 |
| C  | 4.78104900  | 3.03061200  | 0.33360900  |
| H  | 3.05690500  | 4.02306500  | 1.16474800  |
| C  | 5.26255100  | 2.20956600  | -0.68032100 |
| H  | 4.74728700  | 1.06721400  | -2.43772000 |
| H  | 5.46034400  | 3.41912200  | 1.09132900  |
| H  | 6.32018200  | 1.95206800  | -0.72051600 |
| C  | -2.69544900 | 2.32804100  | -1.64662500 |
| C  | -3.11771200 | 1.02407700  | -1.93814500 |
| C  | -3.63360800 | 3.22583500  | -1.13192600 |
| C  | -4.42277500 | 0.61935200  | -1.69382200 |
| H  | -2.39785800 | 0.31420800  | -2.34928100 |
| C  | -4.94588600 | 2.82347100  | -0.88725700 |
| H  | -3.34496500 | 4.25419300  | -0.91582900 |
| C  | -5.34223700 | 1.51789500  | -1.15592700 |
| H  | -4.72219000 | -0.40398100 | -1.91948500 |
| H  | -5.66044200 | 3.53972800  | -0.48340900 |
| H  | -6.36523700 | 1.19951800  | -0.95827100 |
| P  | -0.15525500 | 1.89150200  | -0.51228400 |
| C  | -2.08262600 | 1.29557400  | 1.50588500  |
| C  | -1.05224200 | 2.33233800  | 1.06378800  |
| H  | -2.37236400 | 1.46656900  | 2.55464700  |
| H  | -2.99802200 | 1.38084700  | 0.89821300  |
| H  | -1.52567500 | 3.32224500  | 0.96888500  |
| H  | -0.26330600 | 2.43005700  | 1.82444800  |
| Cu | -0.08967200 | -0.51111600 | -0.59579900 |
| C  | 2.13376500  | -2.46131800 | 0.07144300  |
| O  | 1.70576700  | -1.27739100 | 0.08379900  |
| C  | 3.59182400  | -2.66874700 | -0.15969500 |
| C  | 4.23024100  | -3.90587700 | -0.02100700 |
| C  | 4.36010200  | -1.55258800 | -0.50885400 |
| C  | 5.59897900  | -4.02204800 | -0.23640300 |

|   |             |             |             |
|---|-------------|-------------|-------------|
| H | 3.65883800  | -4.79312600 | 0.24950500  |
| C | 5.72481300  | -1.67004000 | -0.72624900 |
| H | 3.85831000  | -0.58953800 | -0.59557000 |
| C | 6.35226500  | -2.90677100 | -0.59160900 |
| H | 6.08051500  | -4.99274500 | -0.12515600 |
| H | 6.30363500  | -0.78571600 | -0.99473100 |
| H | 7.42404100  | -3.00183400 | -0.75967200 |
| C | 1.35837100  | -3.51013200 | 0.83375100  |
| H | 1.57358100  | -4.54004000 | 0.53244800  |
| H | 1.59931400  | -3.41615700 | 1.90611700  |
| H | 0.28416300  | -3.32499000 | 0.70730600  |
| C | -0.06242800 | -1.42060200 | -2.53506800 |
| C | 0.31981500  | -2.73481300 | -2.16725900 |
| C | 1.59178300  | -3.25190200 | -2.04164200 |
| H | -0.50785600 | -3.38597900 | -1.85999100 |
| H | 2.44088600  | -2.75489200 | -2.50924500 |
| H | 1.72145100  | -4.31912900 | -1.86490800 |
| C | 0.85988100  | -0.51353900 | -3.20487800 |
| C | 0.53185300  | 0.45583800  | -4.07864700 |
| H | 1.91681200  | -0.64031600 | -2.94246800 |
| H | 1.28356400  | 1.09951000  | -4.53390800 |
| H | -0.50261700 | 0.61013300  | -4.39497200 |
| H | -1.12010200 | -1.30742900 | -2.80750600 |

**(E)-(S)-TS2'**

|   |             |             |            |
|---|-------------|-------------|------------|
| C | -2.68692400 | -2.01623300 | 1.50291600 |
| C | -0.17056400 | -1.54754000 | 2.51298000 |
| C | -1.07770500 | -2.51293400 | 3.27987200 |
| C | -2.00664500 | -3.16332300 | 2.26356000 |
| H | -3.34149000 | -1.48912300 | 2.21890000 |
| H | 0.58019800  | -2.13528000 | 1.96420400 |
| H | -0.48726700 | -3.24536100 | 3.84827600 |
| H | -1.69657700 | -1.96742500 | 4.00931200 |
| H | -1.42984600 | -3.78523200 | 1.55834400 |
| H | -2.75437100 | -3.82084400 | 2.72932900 |
| C | 0.55767100  | -0.48164600 | 3.28664000 |
| C | 1.75597600  | 0.03179500  | 2.76948200 |
| C | 0.06580500  | 0.06722800  | 4.47518800 |
| C | 2.42309400  | 1.07205100  | 3.40508400 |
| H | 2.15288800  | -0.38473400 | 1.84253400 |
| C | 0.73612900  | 1.10816200  | 5.11397800 |
| H | -0.85259700 | -0.31517600 | 4.92152900 |
| C | 1.91358700  | 1.62053500  | 4.58007500 |
| H | 3.35206900  | 1.44800500  | 2.97604100 |

|   |             |             |             |
|---|-------------|-------------|-------------|
| H | 0.33328900  | 1.51676000  | 6.03995200  |
| H | 2.43590300  | 2.43315100  | 5.08288700  |
| C | -3.51705700 | -2.44191000 | 0.32553400  |
| C | -4.90709900 | -2.50402300 | 0.44927900  |
| C | -2.94169700 | -2.81662200 | -0.89268600 |
| C | -5.70431800 | -2.93050000 | -0.60835600 |
| H | -5.36931800 | -2.20262500 | 1.39104800  |
| C | -3.73485000 | -3.23659200 | -1.95481300 |
| H | -1.85930400 | -2.75069500 | -1.02173700 |
| C | -5.11962000 | -3.29686500 | -1.81676700 |
| H | -6.78616000 | -2.97122900 | -0.48915600 |
| H | -3.26576200 | -3.51498200 | -2.89814800 |
| H | -5.73909300 | -3.62501100 | -2.64974500 |
| P | -1.26337700 | -0.85008000 | 1.12281600  |
| C | -1.74357400 | 2.97301200  | -1.10003000 |
| C | 0.78392900  | 3.43904400  | -0.12988800 |
| C | 0.12344100  | 4.53937800  | -0.98147900 |
| C | -1.38505600 | 4.42656300  | -0.80463900 |
| H | -1.54248300 | 2.76838500  | -2.16506800 |
| H | 0.80262400  | 3.76909100  | 0.92184500  |
| H | 0.50952000  | 5.52984300  | -0.70480500 |
| H | 0.37933600  | 4.38562400  | -2.04175200 |
| H | -1.64532000 | 4.68838100  | 0.23416300  |
| H | -1.93721900 | 5.11944700  | -1.45632100 |
| C | 2.17504500  | 3.05746600  | -0.54810600 |
| C | 2.42261500  | 2.56138400  | -1.83282400 |
| C | 3.24664100  | 3.16979600  | 0.33743300  |
| C | 3.70589100  | 2.20850400  | -2.22765600 |
| H | 1.59275500  | 2.43944600  | -2.53278500 |
| C | 4.53798800  | 2.82428000  | -0.05505300 |
| H | 3.06402100  | 3.54120500  | 1.34737200  |
| C | 4.77207700  | 2.35091700  | -1.34165300 |
| H | 3.87341300  | 1.81498100  | -3.22955500 |
| H | 5.36305800  | 2.92817700  | 0.64911800  |
| H | 5.77982100  | 2.08030400  | -1.65353100 |
| C | -3.12259500 | 2.47508500  | -0.77622700 |
| C | -3.53417600 | 1.24748900  | -1.31363300 |
| C | -3.99008400 | 3.14280500  | 0.09082900  |
| C | -4.75923600 | 0.69046600  | -0.97265400 |
| H | -2.86828300 | 0.72819900  | -2.00481700 |
| C | -5.21954700 | 2.58352500  | 0.43645900  |
| H | -3.70941400 | 4.10950600  | 0.50807500  |
| C | -5.60401600 | 1.35193200  | -0.08272000 |
| H | -5.05061500 | -0.27145000 | -1.39427100 |

|                   |             |             |             |
|-------------------|-------------|-------------|-------------|
| H                 | -5.87942500 | 3.11909200  | 1.11791900  |
| H                 | -6.56067000 | 0.91071200  | 0.19481600  |
| P                 | -0.41143300 | 1.98247900  | -0.20391300 |
| C                 | -1.93295800 | 0.73601000  | 1.82784600  |
| C                 | -1.04073400 | 1.94275400  | 1.54801600  |
| H                 | -2.09970400 | 0.62288200  | 2.91009400  |
| H                 | -2.92070000 | 0.86686200  | 1.35995400  |
| H                 | -1.56577200 | 2.87796900  | 1.79720300  |
| H                 | -0.13888200 | 1.90291100  | 2.17879500  |
| Cu                | 0.01620300  | -0.28043400 | -0.82810700 |
| C                 | 2.38202800  | -2.18537500 | -0.42040900 |
| O                 | 1.81767700  | -1.09849400 | -0.15058600 |
| C                 | 3.86842900  | -2.21494700 | -0.43722300 |
| C                 | 4.60675500  | -3.40202200 | -0.48623700 |
| C                 | 4.55429800  | -0.99777800 | -0.33496800 |
| C                 | 5.99558900  | -3.37351000 | -0.43767500 |
| H                 | 4.09644600  | -4.36143400 | -0.56280100 |
| C                 | 5.94034400  | -0.97178300 | -0.28843400 |
| H                 | 3.97033000  | -0.07786300 | -0.29213400 |
| C                 | 6.66838000  | -2.15908200 | -0.33817400 |
| H                 | 6.55630100  | -4.30649600 | -0.47453300 |
| H                 | 6.45770600  | -0.01592300 | -0.20236700 |
| H                 | 7.75632000  | -2.13797200 | -0.29662000 |
| C                 | 1.62839800  | -3.47460800 | -0.19938500 |
| H                 | 1.98829000  | -4.31232300 | -0.80465300 |
| H                 | 1.71286200  | -3.76752400 | 0.86146500  |
| H                 | 0.56817100  | -3.30891100 | -0.42297700 |
| C                 | 0.44622200  | -0.53622200 | -2.90479600 |
| C                 | 0.92221000  | -1.87163200 | -2.94803200 |
| C                 | 2.23240600  | -2.25076300 | -2.79655500 |
| H                 | 0.15860600  | -2.65665000 | -3.04132900 |
| H                 | 3.01659800  | -1.49320400 | -2.85654500 |
| H                 | 2.54267500  | -3.28143400 | -2.96220600 |
| C                 | -0.84129200 | -0.18447300 | -3.47869400 |
| C                 | -1.16838200 | 0.99714100  | -4.03553200 |
| H                 | -1.60528600 | -0.97350900 | -3.45364300 |
| H                 | -2.15928700 | 1.19066300  | -4.44205600 |
| H                 | -0.43471400 | 1.80335700  | -4.11786700 |
| H                 | 1.22629300  | 0.23035400  | -3.01474800 |
| <b>(Z)-(S)-C'</b> |             |             |             |
| C                 | -2.89984000 | -1.58388400 | 1.93782700  |
| C                 | -0.32622100 | -1.10473400 | 2.78228800  |
| C                 | -1.28738700 | -1.75327200 | 3.77706600  |

|   |             |             |             |
|---|-------------|-------------|-------------|
| C | -2.28868300 | -2.55820000 | 2.95666200  |
| H | -3.52476300 | -0.86692200 | 2.49696600  |
| H | 0.31847900  | -1.89279000 | 2.36087300  |
| H | -0.74871500 | -2.36990900 | 4.51038400  |
| H | -1.83841500 | -0.98671300 | 4.34593100  |
| H | -1.77099400 | -3.37571100 | 2.42736600  |
| H | -3.07185800 | -3.02088600 | 3.57319100  |
| C | 0.55617400  | 0.02667400  | 3.23063000  |
| C | 1.69064800  | 0.32278700  | 2.46039600  |
| C | 0.25465400  | 0.84470200  | 4.32215200  |
| C | 2.47879600  | 1.42940800  | 2.75597800  |
| H | 1.92634000  | -0.31041600 | 1.59583800  |
| C | 1.05230800  | 1.94796100  | 4.62251200  |
| H | -0.60830500 | 0.62894800  | 4.95277300  |
| C | 2.15932200  | 2.25073400  | 3.83626500  |
| H | 3.34302600  | 1.65185400  | 2.12840300  |
| H | 0.80228200  | 2.57340800  | 5.47885500  |
| H | 2.77586700  | 3.11788500  | 4.06898700  |
| C | -3.73397200 | -2.19713500 | 0.85262200  |
| C | -5.11533900 | -1.99962600 | 0.82352500  |
| C | -3.15295100 | -2.97619100 | -0.15357700 |
| C | -5.89849000 | -2.56183100 | -0.18129500 |
| H | -5.58126700 | -1.38640000 | 1.59675600  |
| C | -3.92745300 | -3.52946200 | -1.16564900 |
| H | -2.07350700 | -3.14113400 | -0.13901600 |
| C | -5.30591300 | -3.32310100 | -1.18360200 |
| H | -6.97507500 | -2.39624300 | -0.18455400 |
| H | -3.45351900 | -4.12768200 | -1.94347300 |
| H | -5.91403500 | -3.75772500 | -1.97507500 |
| P | -1.41165300 | -0.60846500 | 1.31478600  |
| C | -1.43715800 | 2.69302300  | -1.67516600 |
| C | 0.96722800  | 3.30769500  | -0.51739500 |
| C | 0.54616800  | 4.09268700  | -1.77154500 |
| C | -0.97563700 | 4.14336100  | -1.77547700 |
| H | -1.17687300 | 2.19660300  | -2.62514500 |
| H | 0.72477900  | 3.94023300  | 0.35574200  |
| H | 1.00831300  | 5.08986100  | -1.78052100 |
| H | 0.91017700  | 3.56121800  | -2.66715200 |
| H | -1.31649400 | 4.72414800  | -0.90226500 |
| H | -1.38391300 | 4.63558200  | -2.67007900 |
| C | 2.44331000  | 2.99947500  | -0.46846800 |
| C | 2.99610300  | 1.74718900  | -0.74707400 |
| C | 3.30474100  | 4.05575900  | -0.14859000 |
| C | 4.38007700  | 1.57279400  | -0.72414800 |



|    |             |             |             |
|----|-------------|-------------|-------------|
| H  | 2.37281700  | 0.86744600  | -0.92675800 |
| C  | 4.68215700  | 3.87905800  | -0.11977000 |
| H  | 2.87936700  | 5.03408300  | 0.08573300  |
| C  | 5.22639400  | 2.63154300  | -0.41498100 |
| H  | 4.78859100  | 0.58473300  | -0.93679900 |
| H  | 5.33087000  | 4.71559500  | 0.13701900  |
| H  | 6.30529100  | 2.48471000  | -0.39409200 |
| C  | -2.87286500 | 2.38927400  | -1.36601600 |
| C  | -3.34384100 | 1.08727400  | -1.58265400 |
| C  | -3.75506000 | 3.32838100  | -0.82925600 |
| C  | -4.64496100 | 0.72730400  | -1.26212300 |
| H  | -2.66096200 | 0.33681700  | -1.98540300 |
| C  | -5.06287700 | 2.97101700  | -0.50381400 |
| H  | -3.42470000 | 4.35389400  | -0.66466600 |
| C  | -5.51084500 | 1.67090600  | -0.71229500 |
| H  | -4.97983300 | -0.29503000 | -1.43529900 |
| H  | -5.73577200 | 3.71884000  | -0.08619800 |
| H  | -6.53222000 | 1.39230700  | -0.45559900 |
| P  | -0.25879500 | 1.88527600  | -0.44525100 |
| C  | -1.97505800 | 1.11979000  | 1.71065900  |
| C  | -1.03034100 | 2.21256800  | 1.21814300  |
| H  | -2.13440500 | 1.21799000  | 2.79617600  |
| H  | -2.96003400 | 1.21212900  | 1.22778100  |
| H  | -1.54151000 | 3.18778800  | 1.20641900  |
| H  | -0.17726800 | 2.30653200  | 1.90738900  |
| Cu | -0.00926200 | -0.43967600 | -0.58573000 |
| C  | 2.03725600  | -2.46101500 | -0.68788300 |
| O  | 1.79828800  | -1.17594700 | -0.29080500 |
| C  | 3.53871300  | -2.76921500 | -0.65461700 |
| C  | 4.09274600  | -3.90789300 | -1.24617600 |
| C  | 4.39029200  | -1.90769100 | 0.03754200  |
| C  | 5.45777600  | -4.16641500 | -1.16716000 |
| H  | 3.45278700  | -4.61323600 | -1.77892400 |
| C  | 5.75570300  | -2.16358700 | 0.12278700  |
| H  | 3.95437300  | -1.02483400 | 0.50299900  |
| C  | 6.29753100  | -3.29257600 | -0.48322500 |
| H  | 5.86701000  | -5.05785500 | -1.64190800 |
| H  | 6.39973600  | -1.47396200 | 0.66922300  |
| H  | 7.36629900  | -3.49335600 | -0.42089300 |
| C  | 1.34796400  | -3.47449500 | 0.24630700  |
| H  | 1.49839400  | -4.52102500 | -0.05844200 |
| H  | 1.76109300  | -3.35335600 | 1.25833500  |
| H  | 0.26551000  | -3.27374000 | 0.29517500  |
| C  | -0.42313200 | -1.15426000 | -2.88483800 |

|   |             |             |             |
|---|-------------|-------------|-------------|
| C | 0.08157800  | -2.25665300 | -2.27284000 |
| C | 1.51409500  | -2.64089600 | -2.14938700 |
| H | -0.64760800 | -2.96253100 | -1.86671200 |
| H | 2.14673100  | -2.01764400 | -2.79570000 |
| H | 1.62668300  | -3.68384200 | -2.48631300 |
| C | 0.33937500  | -0.13333000 | -3.59222600 |
| C | -0.22625700 | 0.76368900  | -4.41026800 |
| H | 1.42054200  | -0.12089100 | -3.44109100 |
| H | 0.36124100  | 1.50730500  | -4.94452200 |
| H | -1.30428000 | 0.76993300  | -4.58513500 |
| H | -1.51224300 | -1.07756300 | -2.96807400 |

**(E)-(S)-C'**

|   |             |             |             |
|---|-------------|-------------|-------------|
| C | -2.68039600 | -2.11410500 | 1.45031600  |
| C | -0.17281500 | -1.65863200 | 2.49171200  |
| C | -1.08426600 | -2.63754500 | 3.23344900  |
| C | -1.99891700 | -3.27176200 | 2.19504300  |
| H | -3.35941700 | -1.61228200 | 2.16162200  |
| H | 0.57975300  | -2.22869900 | 1.92613600  |
| H | -0.49788200 | -3.37974200 | 3.79319800  |
| H | -1.71119100 | -2.10573700 | 3.96665600  |
| H | -1.40604200 | -3.87009700 | 1.48270100  |
| H | -2.74580300 | -3.94730800 | 2.63599200  |
| C | 0.55529900  | -0.61172900 | 3.29049400  |
| C | 1.74566000  | -0.08395300 | 2.76847600  |
| C | 0.07515600  | -0.10536100 | 4.50196500  |
| C | 2.42292100  | 0.92812500  | 3.43896100  |
| H | 2.11217300  | -0.46978700 | 1.80971200  |
| C | 0.75481200  | 0.91216900  | 5.16851200  |
| H | -0.83735900 | -0.50514800 | 4.94633100  |
| C | 1.92952100  | 1.43619000  | 4.63939900  |
| H | 3.35137100  | 1.31476100  | 3.01628200  |
| H | 0.36432500  | 1.29052900  | 6.11264300  |
| H | 2.46200900  | 2.22755500  | 5.16551800  |
| C | -3.46882500 | -2.52688200 | 0.24086700  |
| C | -4.86078100 | -2.61545400 | 0.30893500  |
| C | -2.84171000 | -2.86795300 | -0.96185000 |
| C | -5.60857200 | -3.02911800 | -0.79001700 |
| H | -5.36457200 | -2.34474700 | 1.23860500  |
| C | -3.58398700 | -3.27338000 | -2.06512600 |
| H | -1.75418700 | -2.79726400 | -1.03331800 |
| C | -4.97263700 | -3.35477800 | -1.98391100 |
| H | -6.69324900 | -3.09201900 | -0.71363500 |
| H | -3.07356600 | -3.53107400 | -2.99332800 |

|    |             |             |             |
|----|-------------|-------------|-------------|
| H  | -5.55462400 | -3.67234500 | -2.84745800 |
| P  | -1.25625800 | -0.92846300 | 1.11737100  |
| C  | -1.83834800 | 2.95404300  | -1.04771200 |
| C  | 0.70746200  | 3.42250800  | -0.12594300 |
| C  | 0.03429900  | 4.52266900  | -0.96358900 |
| C  | -1.47009400 | 4.40738000  | -0.75788600 |
| H  | -1.67985300 | 2.76333300  | -2.12393600 |
| H  | 0.72390700  | 3.74508200  | 0.92805600  |
| H  | 0.42297600  | 5.51271500  | -0.68982000 |
| H  | 0.27014000  | 4.37550600  | -2.02926000 |
| H  | -1.70912600 | 4.66592000  | 0.28658400  |
| H  | -2.03747900 | 5.10149000  | -1.39497200 |
| C  | 2.09808600  | 3.04061800  | -0.54080000 |
| C  | 2.37019000  | 2.62835900  | -1.84878500 |
| C  | 3.14249100  | 3.05322500  | 0.38308500  |
| C  | 3.65313700  | 2.25482100  | -2.22661000 |
| H  | 1.55765400  | 2.59058600  | -2.57973300 |
| C  | 4.43042200  | 2.68010800  | 0.00945600  |
| H  | 2.93765700  | 3.35613400  | 1.41152300  |
| C  | 4.69030600  | 2.28296100  | -1.29743800 |
| H  | 3.84582400  | 1.93332900  | -3.24957100 |
| H  | 5.23314300  | 2.69416300  | 0.74673900  |
| H  | 5.69398600  | 1.97821300  | -1.58885600 |
| C  | -3.20734700 | 2.46177600  | -0.67735400 |
| C  | -3.64131000 | 1.23873000  | -1.20419900 |
| C  | -4.04566900 | 3.12957700  | 0.21765600  |
| C  | -4.86049300 | 0.68683700  | -0.83686900 |
| H  | -2.99283400 | 0.71341400  | -1.90515000 |
| C  | -5.26890600 | 2.57610100  | 0.59264200  |
| H  | -3.74839200 | 4.09173300  | 0.63325800  |
| C  | -5.67780900 | 1.35127100  | 0.07585200  |
| H  | -5.16689300 | -0.27035500 | -1.25803000 |
| H  | -5.90594200 | 3.11181100  | 1.29518100  |
| H  | -6.63153600 | 0.91860700  | 0.37485000  |
| P  | -0.47382500 | 1.95934500  | -0.20189400 |
| C  | -1.92751700 | 0.64457500  | 1.85186200  |
| C  | -1.04504500 | 1.85815100  | 1.56577000  |
| H  | -2.06672100 | 0.52599300  | 2.93733800  |
| H  | -2.92509200 | 0.78039500  | 1.40717600  |
| H  | -1.55703600 | 2.78755000  | 1.86000600  |
| H  | -0.11680500 | 1.79961000  | 2.15742000  |
| Cu | 0.20697300  | -0.19402100 | -0.69603900 |
| C  | 2.44777600  | -2.01502100 | -0.81133400 |
| O  | 1.93238500  | -0.94438100 | -0.14076400 |

|   |             |             |             |
|---|-------------|-------------|-------------|
| C | 3.97360300  | -2.05979000 | -0.66029200 |
| C | 4.74974200  | -3.13714000 | -1.09736500 |
| C | 4.62568200  | -0.96026300 | -0.10198200 |
| C | 6.13523100  | -3.12082300 | -0.96991500 |
| H | 4.27219300  | -4.00848300 | -1.54832100 |
| C | 6.01101500  | -0.93834700 | 0.02402400  |
| H | 4.01200700  | -0.11917000 | 0.21854300  |
| C | 6.77358100  | -2.01994800 | -0.40580900 |
| H | 6.71979500  | -3.97452100 | -1.31232900 |
| H | 6.49656900  | -0.06536200 | 0.46345300  |
| H | 7.85820500  | -2.00671400 | -0.30410800 |
| C | 1.83556700  | -3.33026600 | -0.29642500 |
| H | 2.17704100  | -4.22561100 | -0.83612700 |
| H | 2.09241100  | -3.45593200 | 0.76497700  |
| H | 0.73837400  | -3.28317000 | -0.37741500 |
| C | 0.26966100  | -0.40168700 | -3.09557600 |
| C | 0.72398400  | -1.59300400 | -2.63127500 |
| C | 2.15731500  | -1.86925400 | -2.34221000 |
| H | 0.00172000  | -2.40866700 | -2.50663600 |
| H | 2.76807900  | -1.02755400 | -2.70268400 |
| H | 2.48306400  | -2.77236500 | -2.88408000 |
| C | -1.09676400 | -0.13743000 | -3.51472800 |
| C | -1.47204400 | 0.97142600  | -4.16401400 |
| H | -1.83623400 | -0.91381900 | -3.28629400 |
| H | -2.49992400 | 1.13780500  | -4.47956200 |
| H | -0.74935400 | 1.75299100  | -4.40778200 |
| H | 1.00469700  | 0.38919800  | -3.28575400 |

**(Z)-(S)-TS3'**

|   |             |             |             |
|---|-------------|-------------|-------------|
| C | -0.49683300 | -2.85690400 | -2.19416700 |
| C | 2.04783500  | -1.97580300 | -2.67126000 |
| C | 1.72990500  | -3.38610800 | -3.16233500 |
| C | 0.23794300  | -3.41126400 | -3.43337600 |
| H | -0.62290000 | -3.66698100 | -1.45669400 |
| H | 1.83128500  | -1.27412900 | -3.49663800 |
| H | 2.32581300  | -3.64575400 | -4.04973000 |
| H | 1.97178400  | -4.12905300 | -2.38596500 |
| H | 0.01156700  | -2.76065600 | -4.29288400 |
| H | -0.13682900 | -4.41194200 | -3.68912900 |
| C | 3.44249100  | -1.71226000 | -2.18514000 |
| C | 3.93267200  | -0.40055800 | -2.18353200 |
| C | 4.27659900  | -2.72896300 | -1.70949100 |
| C | 5.20491800  | -0.11205500 | -1.70699700 |
| H | 3.30079800  | 0.40541300  | -2.56005900 |

|   |             |             |             |
|---|-------------|-------------|-------------|
| C | 5.54945600  | -2.44009300 | -1.22496800 |
| H | 3.93927500  | -3.76452500 | -1.71806600 |
| C | 6.01784100  | -1.13102300 | -1.21600900 |
| H | 5.55655300  | 0.91874200  | -1.71539300 |
| H | 6.18130000  | -3.24875500 | -0.86030000 |
| H | 7.01609500  | -0.90730800 | -0.84282700 |
| C | -1.84740800 | -2.30870000 | -2.56789100 |
| C | -2.99324600 | -3.08484600 | -2.38841000 |
| C | -1.97591500 | -1.05581300 | -3.17373800 |
| C | -4.23975500 | -2.62204200 | -2.80120700 |
| H | -2.90335000 | -4.06588000 | -1.91725800 |
| C | -3.21637200 | -0.58973500 | -3.58636400 |
| H | -1.09618800 | -0.41959400 | -3.29953100 |
| C | -4.35324300 | -1.37412600 | -3.40495100 |
| H | -5.12453700 | -3.23749300 | -2.64549600 |
| H | -3.29930800 | 0.40508500  | -4.02437000 |
| H | -5.32743300 | -1.00450800 | -3.72097000 |
| P | 0.68326500  | -1.60550700 | -1.40832100 |
| C | 0.62600600  | -0.44891100 | 3.20859300  |
| C | 2.73475600  | 0.98239500  | 2.17123700  |
| C | 2.23677300  | 1.37978000  | 3.56511900  |
| C | 1.65319700  | 0.12570100  | 4.19020200  |
| H | -0.28942400 | 0.16269000  | 3.27420900  |
| H | 3.57883500  | 0.28276100  | 2.29999000  |
| H | 3.05106000  | 1.81355800  | 4.16162500  |
| H | 1.45597000  | 2.15390000  | 3.48001100  |
| H | 2.46792100  | -0.59527500 | 4.35792200  |
| H | 1.19084600  | 0.31357500  | 5.16917200  |
| C | 3.17946400  | 2.12265300  | 1.30494600  |
| C | 2.33206700  | 3.20375200  | 1.04517700  |
| C | 4.45810100  | 2.13459100  | 0.74752400  |
| C | 2.75341600  | 4.27344300  | 0.26650700  |
| H | 1.31841700  | 3.20246800  | 1.44502100  |
| C | 4.88369000  | 3.20251600  | -0.03987700 |
| H | 5.12956900  | 1.29497700  | 0.93702600  |
| C | 4.03466100  | 4.27688900  | -0.28110500 |
| H | 2.07161800  | 5.10329800  | 0.08131300  |
| H | 5.89011700  | 3.19771700  | -0.45817500 |
| H | 4.36654600  | 5.11330200  | -0.89346000 |
| C | 0.24193900  | -1.88866800 | 3.40294200  |
| C | -1.07060000 | -2.29066800 | 3.13706700  |
| C | 1.15626500  | -2.86972800 | 3.80638700  |
| C | -1.45670700 | -3.62203300 | 3.24214700  |
| H | -1.80677900 | -1.54812000 | 2.83162900  |

|    |             |             |             |
|----|-------------|-------------|-------------|
| C  | 0.77512700  | -4.20354400 | 3.91268900  |
| H  | 2.18379100  | -2.59888200 | 4.04913300  |
| C  | -0.53108900 | -4.58727700 | 3.62604800  |
| H  | -2.49275900 | -3.89002300 | 3.03445000  |
| H  | 1.50565300  | -4.94623200 | 4.23053500  |
| H  | -0.82780000 | -5.63122700 | 3.71267800  |
| P  | 1.31411500  | -0.04166100 | 1.47095900  |
| C  | 1.29270500  | -2.50166000 | 0.10465200  |
| C  | 2.19238600  | -1.59164500 | 0.94480700  |
| H  | 1.81478700  | -3.43560500 | -0.15274700 |
| H  | 0.39518800  | -2.78235900 | 0.68204300  |
| H  | 2.57484100  | -2.13055600 | 1.82312000  |
| H  | 3.06856400  | -1.25735500 | 0.36506800  |
| Cu | 0.14965000  | 0.54837000  | -0.48590300 |
| C  | -2.89582100 | 1.33296500  | 0.11116900  |
| O  | -1.82442200 | 0.97797200  | -0.71830100 |
| C  | -3.94587400 | -2.11319900 | 1.12118300  |
| C  | -3.20076500 | -1.10424700 | 0.64191100  |
| C  | -3.03051700 | 0.26244000  | 1.21618400  |
| H  | -2.64134100 | -1.26544400 | -0.28230900 |
| H  | -2.10117600 | 0.30061100  | 1.81410100  |
| H  | -3.85222700 | 0.53683400  | 1.89674200  |
| C  | -4.72941200 | -2.10520900 | 2.34271600  |
| C  | -5.40657500 | -3.16778700 | 2.79592000  |
| H  | -4.74632300 | -1.17912800 | 2.92327500  |
| H  | -5.98092100 | -3.13959700 | 3.71890400  |
| H  | -5.41194400 | -4.10872500 | 2.24313800  |
| H  | -3.95862500 | -3.05344600 | 0.55989900  |
| C  | -1.11340100 | 2.82505200  | -2.41778500 |
| C  | -1.93406700 | 4.03744400  | -2.33952400 |
| H  | -1.63358000 | 1.93718700  | -1.58640500 |
| C  | -2.93973100 | 4.36993400  | -3.15734600 |
| H  | -1.72205800 | 4.68753800  | -1.48138300 |
| H  | -3.53987900 | 5.26272000  | -2.99471700 |
| H  | -3.19346300 | 3.75818100  | -4.02542300 |
| C  | 0.18665700  | 2.82416000  | -1.79977200 |
| H  | 0.32342800  | 3.55540200  | -0.99122800 |
| C  | 1.18606700  | 1.90193900  | -1.97427400 |
| H  | 1.16810800  | 1.24502500  | -2.84976600 |
| H  | 2.14805000  | 2.03027100  | -1.47588700 |
| H  | -1.16690500 | 2.29626700  | -3.38188200 |
| C  | -2.65260000 | 2.69299400  | 0.78120700  |
| C  | -3.58118100 | 3.73486600  | 0.75004900  |
| C  | -1.44639200 | 2.92252800  | 1.45475800  |

|   |             |            |             |
|---|-------------|------------|-------------|
| C | -3.31650900 | 4.96032000 | 1.35851100  |
| H | -4.52322500 | 3.60744000 | 0.22131500  |
| C | -1.17470600 | 4.14292800 | 2.06221800  |
| H | -0.69467300 | 2.12954300 | 1.47298300  |
| C | -2.11178700 | 5.17254500 | 2.01621500  |
| H | -4.05932700 | 5.75546900 | 1.30784700  |
| H | -0.22674000 | 4.29662400 | 2.58117000  |
| H | -1.90266500 | 6.12999000 | 2.49110300  |
| C | -4.16979700 | 1.33702100 | -0.73365200 |
| H | -4.28568000 | 0.35312100 | -1.20220000 |
| H | -5.06975000 | 1.53465800 | -0.13397100 |
| H | -4.10095600 | 2.09127700 | -1.53200600 |

**(E)-(S)-TS3'**

|   |             |             |             |
|---|-------------|-------------|-------------|
| C | -0.73729400 | -2.85979800 | -2.06844300 |
| C | 1.83051900  | -2.11425400 | -2.68048000 |
| C | 1.37268600  | -3.47184200 | -3.20901300 |
| C | -0.12970100 | -3.37410700 | -3.38760200 |
| H | -0.81233300 | -3.70160500 | -1.36001600 |
| H | 1.65734500  | -1.36760500 | -3.47505500 |
| H | 1.89634700  | -3.73365700 | -4.14013100 |
| H | 1.59844100  | -4.26734300 | -2.48131600 |
| H | -0.36050300 | -2.65151900 | -4.18660200 |
| H | -0.59279000 | -4.32658200 | -3.68027500 |
| C | 3.25721900  | -1.99742500 | -2.22865700 |
| C | 3.87013400  | -0.73891200 | -2.19884400 |
| C | 4.00346000  | -3.10336900 | -1.80986500 |
| C | 5.17882200  | -0.59007200 | -1.75735900 |
| H | 3.30664700  | 0.13687900  | -2.52271500 |
| C | 5.31142000  | -2.95453000 | -1.35694600 |
| H | 3.56787300  | -4.10112500 | -1.84229200 |
| C | 5.90444700  | -1.69736700 | -1.32489200 |
| H | 5.62831100  | 0.40189500  | -1.74854700 |
| H | 5.87225600  | -3.83177500 | -1.03755400 |
| H | 6.93017000  | -1.58208500 | -0.97819800 |
| C | -2.10089400 | -2.26457900 | -2.28788400 |
| C | -3.24789400 | -3.00891100 | -2.00734800 |
| C | -2.24950100 | -0.99724800 | -2.85695600 |
| C | -4.51452800 | -2.49888600 | -2.28091000 |
| H | -3.14291000 | -4.00423100 | -1.56955800 |
| C | -3.50924200 | -0.48815700 | -3.13944400 |
| H | -1.36701000 | -0.38466400 | -3.05765900 |
| C | -4.64722000 | -1.23780300 | -2.85155400 |
| H | -5.39879200 | -3.08655300 | -2.03707900 |

|    |             |             |             |
|----|-------------|-------------|-------------|
| H  | -3.60230300 | 0.51435800  | -3.55745700 |
| H  | -5.63591000 | -0.83105200 | -3.05812200 |
| P  | 0.54383700  | -1.66742800 | -1.35456400 |
| C  | 0.72712700  | -0.41212300 | 3.20804800  |
| C  | 2.88660000  | 0.85777600  | 2.06921900  |
| C  | 2.46043700  | 1.31521500  | 3.46835900  |
| C  | 1.82515700  | 0.10923100  | 4.13987400  |
| H  | -0.14219600 | 0.26022700  | 3.29545300  |
| H  | 3.68710300  | 0.10722000  | 2.18967700  |
| H  | 3.31852600  | 1.71059800  | 4.02902100  |
| H  | 1.72433300  | 2.13340400  | 3.39053100  |
| H  | 2.60114500  | -0.65806100 | 4.28716100  |
| H  | 1.41598500  | 0.34148200  | 5.13281300  |
| C  | 3.37429900  | 1.94107200  | 1.15462400  |
| C  | 2.58347200  | 3.06026300  | 0.88144800  |
| C  | 4.63132800  | 1.85627700  | 0.55614200  |
| C  | 3.03799800  | 4.07388200  | 0.04843200  |
| H  | 1.58538200  | 3.12858700  | 1.31101100  |
| C  | 5.08907600  | 2.86525300  | -0.28882300 |
| H  | 5.25994000  | 0.98783800  | 0.76095900  |
| C  | 4.29559100  | 3.97844700  | -0.54393800 |
| H  | 2.40022400  | 4.93652900  | -0.14501000 |
| H  | 6.07715700  | 2.78372500  | -0.74170100 |
| H  | 4.65326600  | 4.76819300  | -1.20205300 |
| C  | 0.24975600  | -1.82065600 | 3.42074200  |
| C  | -1.07980900 | -2.13953100 | 3.12543800  |
| C  | 1.08987900  | -2.85324700 | 3.85079700  |
| C  | -1.55367000 | -3.44259200 | 3.22420900  |
| H  | -1.76211800 | -1.35159700 | 2.80988900  |
| C  | 0.62062900  | -4.15972300 | 3.95339500  |
| H  | 2.12661700  | -2.64493300 | 4.11534300  |
| C  | -0.69913000 | -4.46253900 | 3.63439900  |
| H  | -2.59759700 | -3.65058200 | 2.98721100  |
| H  | 1.29446800  | -4.94560700 | 4.29213500  |
| H  | -1.06279000 | -5.48536600 | 3.71765100  |
| P  | 1.37901900  | -0.08753000 | 1.44101200  |
| C  | 1.18600000  | -2.58132000 | 0.13364400  |
| C  | 2.14925700  | -1.70053300 | 0.93169500  |
| H  | 1.67365300  | -3.52580900 | -0.15210600 |
| H  | 0.30864500  | -2.84092300 | 0.74935100  |
| H  | 2.52613700  | -2.23857000 | 1.81355600  |
| H  | 3.02439300  | -1.43076400 | 0.31918600  |
| Cu | 0.14220900  | 0.53602500  | -0.46760100 |
| C  | -2.77914800 | 1.66294700  | 0.26349800  |



|                     |             |             |             |
|---------------------|-------------|-------------|-------------|
| O                   | -1.79983000 | 1.14372800  | -0.59420400 |
| C                   | -4.36484500 | -1.35009800 | 1.68689100  |
| C                   | -3.38369200 | -0.67234600 | 1.07184000  |
| C                   | -2.94578200 | 0.69896600  | 1.45615200  |
| H                   | -2.83834700 | -1.14712500 | 0.24564100  |
| H                   | -1.95797100 | 0.64177200  | 1.94985800  |
| H                   | -3.64419100 | 1.12995400  | 2.19280900  |
| C                   | -4.73539700 | -2.71452600 | 1.36413000  |
| C                   | -5.67728100 | -3.41684900 | 2.00552200  |
| H                   | -4.17756900 | -3.17620500 | 0.54390100  |
| H                   | -5.91759900 | -4.44286400 | 1.73603500  |
| H                   | -6.24822100 | -2.97957000 | 2.82535900  |
| H                   | -4.91579500 | -0.87145000 | 2.50427100  |
| C                   | -1.04097600 | 2.80726900  | -2.45917900 |
| C                   | -1.76329300 | 4.08291700  | -2.44241600 |
| H                   | -1.57960700 | 2.02517300  | -1.53565800 |
| C                   | -2.78724200 | 4.42682700  | -3.23260600 |
| H                   | -1.45126000 | 4.78437300  | -1.65846800 |
| H                   | -3.30598800 | 5.37635400  | -3.11837300 |
| H                   | -3.13690600 | 3.76844000  | -4.03034900 |
| C                   | 0.28826100  | 2.75641800  | -1.90784800 |
| H                   | 0.51397000  | 3.52435800  | -1.15591700 |
| C                   | 1.21811200  | 1.76400900  | -2.07085700 |
| H                   | 1.12084000  | 1.06484200  | -2.90686700 |
| H                   | 2.20609500  | 1.85740900  | -1.61686000 |
| H                   | -1.18447300 | 2.21100900  | -3.37399500 |
| C                   | -2.36610000 | 3.03435200  | 0.81775600  |
| C                   | -3.19079300 | 4.15995400  | 0.76345600  |
| C                   | -1.10750000 | 3.18509400  | 1.41123200  |
| C                   | -2.77362900 | 5.38955600  | 1.26902300  |
| H                   | -4.17217400 | 4.09427000  | 0.29821300  |
| C                   | -0.68511500 | 4.40793800  | 1.92001100  |
| H                   | -0.43692300 | 2.32276900  | 1.44365400  |
| C                   | -1.51869800 | 5.52172800  | 1.84891600  |
| H                   | -3.43787400 | 6.25032800  | 1.20228200  |
| H                   | 0.30031600  | 4.49874200  | 2.38099800  |
| H                   | -1.18960900 | 6.48147800  | 2.24440800  |
| C                   | -4.10023000 | 1.73761400  | -0.50056400 |
| H                   | -4.33080800 | 0.74429900  | -0.90110200 |
| H                   | -4.93721300 | 2.04317700  | 0.14371900  |
| H                   | -4.02257700 | 2.44140800  | -1.34250400 |
| <b>(Z)-(R)-TS2'</b> |             |             |             |
| C                   | 3.08284800  | 0.58680700  | 1.53695700  |

|   |             |             |             |
|---|-------------|-------------|-------------|
| C | 0.64904300  | 1.25523700  | 2.61716200  |
| C | 1.88731800  | 1.54027500  | 3.46338600  |
| C | 3.01917700  | 1.79994800  | 2.47863700  |
| H | 3.47388200  | -0.26570000 | 2.11844800  |
| H | 0.35212000  | 2.19850200  | 2.13118200  |
| H | 1.71782200  | 2.38318800  | 4.14854800  |
| H | 2.14992100  | 0.66813700  | 4.08438000  |
| H | 2.80188900  | 2.70765300  | 1.89018700  |
| H | 3.98954400  | 1.96216100  | 2.96873500  |
| C | -0.57129300 | 0.66846300  | 3.26404900  |
| C | -1.79248600 | 0.76139800  | 2.58206100  |
| C | -0.53405500 | -0.01742200 | 4.47948200  |
| C | -2.93802000 | 0.16691400  | 3.09593700  |
| H | -1.83035400 | 1.28456400  | 1.62292500  |
| C | -1.68398200 | -0.61314200 | 4.99479600  |
| H | 0.39872500  | -0.08902100 | 5.03908700  |
| C | -2.88741300 | -0.52975200 | 4.30274900  |
| H | -3.87394900 | 0.24703400  | 2.54389400  |
| H | -1.63555400 | -1.14218700 | 5.94574800  |
| H | -3.78610200 | -0.99369000 | 4.70748800  |
| C | 3.95830400  | 0.77665400  | 0.33122500  |
| C | 5.23291400  | 0.20590500  | 0.30158300  |
| C | 3.54572000  | 1.53774300  | -0.76625600 |
| C | 6.07262000  | 0.38194700  | -0.79395600 |
| H | 5.56365900  | -0.39651400 | 1.14965900  |
| C | 4.37678100  | 1.70838400  | -1.86757000 |
| H | 2.54902800  | 1.98394900  | -0.77066200 |
| C | 5.64389500  | 1.13019800  | -1.88620400 |
| H | 7.06205300  | -0.07341500 | -0.79684900 |
| H | 4.03022600  | 2.29433500  | -2.71805000 |
| H | 6.29371000  | 1.26297000  | -2.74945000 |
| P | 1.27258200  | 0.18050200  | 1.18781600  |
| C | -0.03564700 | -3.49737700 | -1.01077700 |
| C | -2.47152900 | -2.87397500 | 0.07355100  |
| C | -2.35074300 | -4.18305700 | -0.73204700 |
| C | -0.91526000 | -4.68041700 | -0.62445400 |
| H | -0.22387400 | -3.25614300 | -2.07195600 |
| H | -2.57554500 | -3.12304700 | 1.14253700  |
| H | -3.08450400 | -4.92206700 | -0.38230600 |
| H | -2.58362800 | -3.97978500 | -1.78936200 |
| H | -0.71331000 | -4.99507200 | 0.41250800  |
| H | -0.72704900 | -5.55412200 | -1.26563400 |
| C | -3.61648700 | -1.99208700 | -0.33239500 |
| C | -3.70312700 | -1.49185900 | -1.63488400 |

|    |             |             |             |
|----|-------------|-------------|-------------|
| C  | -4.61579300 | -1.65170400 | 0.57841800  |
| C  | -4.76108800 | -0.67701800 | -2.01442600 |
| H  | -2.91650500 | -1.73096500 | -2.35365000 |
| C  | -5.67483100 | -0.82801700 | 0.20453000  |
| H  | -4.55962100 | -2.03809300 | 1.59805100  |
| C  | -5.75061400 | -0.33728400 | -1.09408300 |
| H  | -4.80989100 | -0.29806400 | -3.03546900 |
| H  | -6.44530700 | -0.57429000 | 0.93183000  |
| H  | -6.57775800 | 0.30588800  | -1.39046800 |
| C  | 1.44486200  | -3.56546600 | -0.79164000 |
| C  | 2.24399900  | -2.57256300 | -1.37412100 |
| C  | 2.05860000  | -4.51406300 | 0.02783200  |
| C  | 3.60603800  | -2.50213700 | -1.11826900 |
| H  | 1.76932500  | -1.83215700 | -2.01965700 |
| C  | 3.42841200  | -4.45105600 | 0.28194600  |
| H  | 1.46687600  | -5.30946900 | 0.48070200  |
| C  | 4.20342800  | -3.44026700 | -0.27697000 |
| H  | 4.19995200  | -1.70533900 | -1.56647500 |
| H  | 3.88915200  | -5.19838600 | 0.92680400  |
| H  | 5.27156500  | -3.38631600 | -0.06930400 |
| P  | -0.78790900 | -2.03142200 | -0.09742800 |
| C  | 1.19931500  | -1.54689300 | 1.87861000  |
| C  | -0.12833700 | -2.25776500 | 1.63340400  |
| H  | 1.42874200  | -1.52666200 | 2.95562000  |
| H  | 2.02142900  | -2.08714700 | 1.38453400  |
| H  | -0.03644300 | -3.32798800 | 1.87646800  |
| H  | -0.90309200 | -1.84471500 | 2.29702400  |
| Cu | -0.07687800 | 0.17170200  | -0.77437700 |
| C  | -1.92540400 | 2.61364400  | -1.12188000 |
| O  | -1.66936400 | 1.48026300  | -0.63373100 |
| C  | -1.18560300 | 3.81612100  | -0.62533900 |
| C  | -1.71678700 | 5.10814600  | -0.68574100 |
| C  | 0.07685900  | 3.65016100  | -0.04485500 |
| C  | -1.00504000 | 6.19537500  | -0.18587300 |
| H  | -2.70013600 | 5.27412000  | -1.12326400 |
| C  | 0.79316400  | 4.73255100  | 0.44412000  |
| H  | 0.49471300  | 2.64370800  | -0.01287800 |
| C  | 0.25264300  | 6.01595700  | 0.37925000  |
| H  | -1.44076900 | 7.19219700  | -0.24031900 |
| H  | 1.78314300  | 4.57812100  | 0.87696600  |
| H  | 0.80932600  | 6.86849300  | 0.76472000  |
| C  | 0.33290700  | 0.48304200  | -2.86839200 |
| C  | 0.22869400  | 1.89172400  | -2.91115700 |
| C  | -0.89730600 | 2.65098500  | -3.16728700 |

|   |             |             |             |
|---|-------------|-------------|-------------|
| H | 1.12989500  | 2.43532700  | -2.60295400 |
| H | -1.74388600 | 2.20146500  | -3.68642100 |
| H | -0.79588300 | 3.72897800  | -3.28606000 |
| C | -0.69819500 | -0.37149300 | -3.44289800 |
| C | -0.51915000 | -1.58252200 | -3.99983800 |
| H | -1.71845600 | 0.02609700  | -3.38564400 |
| H | -1.35237700 | -2.15969700 | -4.39980300 |
| H | 0.47487300  | -2.02494300 | -4.09879100 |
| H | 1.35614500  | 0.08673800  | -2.89627400 |
| C | -3.31064100 | 2.81643900  | -1.68983000 |
| H | -4.01111400 | 3.03599100  | -0.86784700 |
| H | -3.37405500 | 3.62833200  | -2.42342000 |
| H | -3.63652100 | 1.87929200  | -2.15535600 |

**(E)-(R)-TS2'**

|   |             |             |             |
|---|-------------|-------------|-------------|
| C | 2.12473800  | 2.25615200  | 1.58293700  |
| C | -0.26141000 | 1.30161100  | 2.56241400  |
| C | 0.48700500  | 2.32630500  | 3.41218200  |
| C | 1.27088500  | 3.19911300  | 2.44471700  |
| H | 2.93201800  | 1.84918700  | 2.21708900  |
| H | -1.06217500 | 1.81716900  | 2.00906200  |
| H | -0.20388500 | 2.90308500  | 4.04387300  |
| H | 1.20001500  | 1.82678100  | 4.08770600  |
| H | 0.57673800  | 3.75465600  | 1.79164900  |
| H | 1.90183900  | 3.94481400  | 2.94917500  |
| C | -0.86300600 | 0.11225900  | 3.25552100  |
| C | -1.93076200 | -0.55944600 | 2.64528400  |
| C | -0.37864000 | -0.38648800 | 4.46849700  |
| C | -2.48899500 | -1.69247100 | 3.22316500  |
| H | -2.30340000 | -0.17844200 | 1.69418600  |
| C | -0.93222200 | -1.52770200 | 5.04487200  |
| H | 0.43741400  | 0.12011800  | 4.98405400  |
| C | -1.98731900 | -2.18794600 | 4.42502700  |
| H | -3.32405600 | -2.18844800 | 2.72765000  |
| H | -0.53785800 | -1.89713100 | 5.99070900  |
| H | -2.42395600 | -3.07523000 | 4.88126800  |
| C | 2.74425900  | 2.93272900  | 0.39061900  |
| C | 4.04148100  | 3.44178800  | 0.48699400  |
| C | 2.04614500  | 3.11122100  | -0.80722700 |
| C | 4.63665800  | 4.09694300  | -0.58650500 |
| H | 4.59524000  | 3.30628700  | 1.41837100  |
| C | 2.64279100  | 3.75255400  | -1.88801400 |
| H | 1.02823400  | 2.72470700  | -0.90064400 |
| C | 3.94109600  | 4.24479400  | -1.78320800 |

|    |             |             |             |
|----|-------------|-------------|-------------|
| H  | 5.64990800  | 4.48502100  | -0.49076200 |
| H  | 2.08669700  | 3.86708600  | -2.81823600 |
| H  | 4.40771400  | 4.74497600  | -2.63025000 |
| P  | 0.95944900  | 0.82877700  | 1.19076200  |
| C  | 2.34425900  | -2.56765400 | -1.18380500 |
| C  | 0.01582400  | -3.78607300 | -0.37219400 |
| C  | 0.89814300  | -4.53029200 | -1.38278100 |
| C  | 2.33312500  | -4.09399900 | -1.12752400 |
| H  | 2.17020800  | -2.25136300 | -2.22578400 |
| H  | 0.18583000  | -4.23021500 | 0.62281000  |
| H  | 0.76119200  | -5.61684700 | -1.29559800 |
| H  | 0.61377200  | -4.25519300 | -2.41075200 |
| H  | 2.63860300  | -4.44740600 | -0.12953400 |
| H  | 3.04165000  | -4.52538300 | -1.84920400 |
| C  | -1.45914100 | -3.77171500 | -0.64721900 |
| C  | -2.36410800 | -3.95730800 | 0.40036000  |
| C  | -1.96788600 | -3.53795200 | -1.92907900 |
| C  | -3.73698600 | -3.93630400 | 0.17363600  |
| H  | -1.98023600 | -4.12055300 | 1.40977100  |
| C  | -3.33859800 | -3.52096400 | -2.16002500 |
| H  | -1.28472500 | -3.36295500 | -2.76159500 |
| C  | -4.22983400 | -3.72577900 | -1.11004700 |
| H  | -4.42494500 | -4.09331400 | 1.00399800  |
| H  | -3.71310000 | -3.33910500 | -3.16670500 |
| H  | -5.30327500 | -3.71412900 | -1.29154500 |
| C  | 3.55910500  | -1.84334700 | -0.67661600 |
| C  | 3.74921200  | -0.50757900 | -1.05384100 |
| C  | 4.48142500  | -2.42322600 | 0.19775600  |
| C  | 4.81846900  | 0.22989500  | -0.56276200 |
| H  | 3.03922000  | -0.04819200 | -1.74494200 |
| C  | 5.54976500  | -1.68193100 | 0.69883700  |
| H  | 4.37434100  | -3.46543500 | 0.49749900  |
| C  | 5.71916600  | -0.35221400 | 0.32727400  |
| H  | 4.94298500  | 1.26549800  | -0.87794600 |
| H  | 6.25580400  | -2.15194700 | 1.38231800  |
| H  | 6.55659900  | 0.22454700  | 0.71746800  |
| P  | 0.75606200  | -2.05045200 | -0.29262900 |
| C  | 1.87996900  | -0.62243100 | 1.90512500  |
| C  | 1.27328900  | -1.96714200 | 1.49800900  |
| H  | 1.93674500  | -0.54712300 | 3.00198000  |
| H  | 2.90635400  | -0.53828600 | 1.52058900  |
| H  | 1.97164700  | -2.78764400 | 1.72764100  |
| H  | 0.35068800  | -2.16291800 | 2.06863300  |
| Cu | -0.16275100 | 0.03176100  | -0.84957500 |

|   |             |             |             |
|---|-------------|-------------|-------------|
| C | -3.01809900 | 1.04701000  | -0.63370300 |
| C | -3.81857000 | 2.29319100  | -0.50527300 |
| C | -5.20364900 | 2.32533900  | -0.69378400 |
| C | -3.16032100 | 3.47726500  | -0.14775500 |
| C | -5.91163000 | 3.51163000  | -0.53397500 |
| H | -5.73629300 | 1.41552100  | -0.96807100 |
| C | -3.86612000 | 4.66077700  | 0.00622600  |
| H | -2.07937900 | 3.43981500  | -0.00827400 |
| C | -5.24686100 | 4.68309800  | -0.18526200 |
| H | -6.99056600 | 3.52017400  | -0.68242900 |
| H | -3.33913900 | 5.57453600  | 0.27822400  |
| H | -5.80156800 | 5.61207700  | -0.06271400 |
| C | -3.72094000 | -0.27576000 | -0.79612800 |
| H | -4.21084400 | -0.54945900 | 0.15480500  |
| H | -4.48658100 | -0.28769400 | -1.57998900 |
| H | -2.97837600 | -1.05217400 | -1.01647400 |
| O | -1.85068100 | 1.04848200  | -0.16439100 |
| C | -0.28073200 | 0.72093500  | -2.88851400 |
| C | -1.66329000 | 0.52869300  | -3.13593900 |
| C | -2.66197700 | 1.44560800  | -2.92473100 |
| H | -1.95759100 | -0.48484400 | -3.44414000 |
| H | -2.40098600 | 2.49048200  | -2.74871000 |
| H | -3.67735700 | 1.25694700  | -3.26973400 |
| C | 0.68266900  | -0.17331900 | -3.51311900 |
| C | 1.94240900  | 0.12291200  | -3.87878400 |
| H | 0.30796900  | -1.18710500 | -3.71565000 |
| H | 2.59549500  | -0.61146800 | -4.34733600 |
| H | 2.35955100  | 1.11892300  | -3.71270400 |
| H | 0.04363500  | 1.76712500  | -2.79983300 |

**(Z)-(R)-C'**

|   |             |             |            |
|---|-------------|-------------|------------|
| C | -2.58465500 | 1.35152000  | 1.74003500 |
| C | -1.08918800 | -0.73393800 | 2.69028800 |
| C | -2.08411100 | -0.11673100 | 3.66812900 |
| C | -3.21293000 | 0.44319900  | 2.81215000 |
| H | -2.34497600 | 2.32606500  | 2.19652200 |
| H | -1.59518000 | -1.56931800 | 2.18299700 |
| H | -2.44250700 | -0.85563100 | 4.40057200 |
| H | -1.61628300 | 0.70231700  | 4.23932000 |
| H | -3.74141100 | -0.39167500 | 2.32480800 |
| H | -3.95956300 | 0.99508600  | 3.39933900 |
| C | 0.23932400  | -1.21734600 | 3.19460800 |
| C | 1.03116900  | -2.01934700 | 2.35676300 |
| C | 0.73187200  | -0.86887800 | 4.45436200 |

|   |             |             |             |
|---|-------------|-------------|-------------|
| C | 2.28145800  | -2.45319400 | 2.78164700  |
| H | 0.67504900  | -2.29020700 | 1.35395600  |
| C | 1.99137300  | -1.29682300 | 4.86975900  |
| H | 0.12776900  | -0.26111200 | 5.12828200  |
| C | 2.77179100  | -2.08844500 | 4.03489600  |
| H | 2.87227800  | -3.08674900 | 2.12167000  |
| H | 2.35759800  | -1.01385600 | 5.85599000  |
| H | 3.75153600  | -2.43218100 | 4.36473400  |
| C | -3.41996100 | 1.57894400  | 0.51303100  |
| C | -3.70385800 | 2.87529300  | 0.08112700  |
| C | -3.89491800 | 0.50425400  | -0.24837500 |
| C | -4.43752500 | 3.10145800  | -1.08096600 |
| H | -3.34425100 | 3.72029200  | 0.67151300  |
| C | -4.63133400 | 0.72725900  | -1.40600600 |
| H | -3.67549100 | -0.52508600 | 0.04939000  |
| C | -4.90332300 | 2.02643200  | -1.83032000 |
| H | -4.64986600 | 4.12268600  | -1.39644100 |
| H | -4.98543600 | -0.12860600 | -1.98132100 |
| H | -5.47746400 | 2.19857000  | -2.73921100 |
| P | -0.93061700 | 0.54106600  | 1.31810000  |
| C | 2.46822000  | 2.62527000  | -0.88110100 |
| C | 3.74371800  | 0.31333500  | -0.13329000 |
| C | 4.55868000  | 1.37686900  | -0.89143300 |
| C | 3.95955700  | 2.74020200  | -0.58008600 |
| H | 2.34964700  | 2.45966500  | -1.96643400 |
| H | 4.07061200  | 0.29221900  | 0.91979500  |
| H | 5.62363700  | 1.31076500  | -0.63077700 |
| H | 4.48384600  | 1.18305400  | -1.97345100 |
| H | 4.12381200  | 2.97131100  | 0.48535000  |
| H | 4.42924700  | 3.54930000  | -1.15893300 |
| C | 3.84470400  | -1.07185800 | -0.70593800 |
| C | 3.36227200  | -1.35112400 | -1.98769000 |
| C | 4.41070400  | -2.11047600 | 0.03161500  |
| C | 3.42764100  | -2.63527000 | -2.50948100 |
| H | 2.91091600  | -0.55004700 | -2.57745300 |
| C | 4.47763200  | -3.40108500 | -0.48640800 |
| H | 4.79565800  | -1.90332600 | 1.03193900  |
| C | 3.98114700  | -3.66817700 | -1.75705200 |
| H | 3.03672900  | -2.83493700 | -3.50716800 |
| H | 4.91884600  | -4.20047200 | 0.10782600  |
| H | 4.02404800  | -4.67789700 | -2.16202600 |
| C | 1.55807800  | 3.74374500  | -0.46771800 |
| C | 0.24388200  | 3.76044600  | -0.95366500 |
| C | 1.94438800  | 4.75089400  | 0.41902100  |

|    |             |             |             |
|----|-------------|-------------|-------------|
| C  | -0.65746900 | 4.74016400  | -0.55975900 |
| H  | -0.07277400 | 2.97206900  | -1.63839600 |
| C  | 1.04113600  | 5.73343800  | 0.82006800  |
| H  | 2.96351800  | 4.77776100  | 0.80332800  |
| C  | -0.26258500 | 5.73122300  | 0.33725700  |
| H  | -1.67292700 | 4.72365800  | -0.95415500 |
| H  | 1.36506200  | 6.50828300  | 1.51350300  |
| H  | -0.96522100 | 6.50175700  | 0.65032700  |
| P  | 1.97296400  | 0.97075100  | -0.12134400 |
| C  | 0.29244100  | 1.75524500  | 2.03314800  |
| C  | 1.73820800  | 1.40604300  | 1.67634800  |
| H  | 0.17897100  | 1.82226400  | 3.12640700  |
| H  | 0.02245000  | 2.73877800  | 1.62097800  |
| H  | 2.41727800  | 2.22192600  | 1.96824300  |
| H  | 2.05160500  | 0.51134500  | 2.23387500  |
| Cu | 0.09888700  | -0.31265600 | -0.65300100 |
| C  | -0.79166700 | -2.87537400 | -1.54845600 |
| O  | 0.10402800  | -2.28383500 | -0.69325000 |
| C  | -2.18592400 | -3.02055200 | -0.90313400 |
| C  | -3.39711800 | -2.96861200 | -1.59911900 |
| C  | -2.24504400 | -3.24004800 | 0.47583900  |
| C  | -4.61956900 | -3.07907000 | -0.93674700 |
| H  | -3.40203500 | -2.82575100 | -2.68043800 |
| C  | -3.45924000 | -3.35463300 | 1.14515300  |
| H  | -1.30089100 | -3.31230800 | 1.01508800  |
| C  | -4.65850300 | -3.25985400 | 0.44170400  |
| H  | -5.54767600 | -3.02034200 | -1.50580600 |
| H  | -3.46907500 | -3.51862200 | 2.22408100  |
| H  | -5.61285300 | -3.33974400 | 0.96025900  |
| C  | -0.64004800 | 0.51020600  | -2.88988600 |
| C  | -1.28166400 | -0.63642700 | -2.54811800 |
| C  | -0.87539600 | -2.03963000 | -2.85182700 |
| H  | -2.23194700 | -0.52164900 | -2.02031800 |
| H  | 0.12333600  | -2.08093600 | -3.30810800 |
| H  | -1.57558600 | -2.47922800 | -3.58237300 |
| C  | 0.57565600  | 0.60409000  | -3.68308800 |
| C  | 1.09709700  | 1.75268600  | -4.13390700 |
| H  | 1.06996700  | -0.33676100 | -3.93616900 |
| H  | 1.99754000  | 1.77191000  | -4.74469200 |
| H  | 0.62862700  | 2.71569700  | -3.92191500 |
| H  | -1.12582000 | 1.45662300  | -2.62586100 |
| C  | -0.30240500 | -4.28475400 | -1.91042700 |
| H  | -0.22186400 | -4.88951600 | -0.99767100 |
| H  | -0.97657100 | -4.80039100 | -2.61176200 |



|                   |             |             |             |
|-------------------|-------------|-------------|-------------|
| H                 | 0.70062300  | -4.21000700 | -2.35523200 |
| <b>(E)-(R)-C'</b> |             |             |             |
| C                 | 2.90903000  | 0.67666100  | 1.67628900  |
| C                 | 0.38429100  | 0.99566000  | 2.72666900  |
| C                 | 1.56200600  | 1.55100000  | 3.53162700  |
| C                 | 2.65878500  | 1.91867000  | 2.54537900  |
| H                 | 3.36317700  | -0.10009800 | 2.31669500  |
| H                 | -0.15409000 | 1.81801300  | 2.22794000  |
| H                 | 1.24791200  | 2.40408600  | 4.14947600  |
| H                 | 1.95898100  | 0.78788200  | 4.21979200  |
| H                 | 2.32972200  | 2.75482200  | 1.90576100  |
| H                 | 3.58696500  | 2.24137800  | 3.03839300  |
| C                 | -0.63907700 | 0.18790600  | 3.47598500  |
| C                 | -1.98077500 | 0.24682600  | 3.06888200  |
| C                 | -0.30769000 | -0.64646000 | 4.54940700  |
| C                 | -2.94998900 | -0.50681500 | 3.72404900  |
| H                 | -2.23556400 | 0.88307800  | 2.21283300  |
| C                 | -1.27910500 | -1.40706400 | 5.19491500  |
| H                 | 0.72267300  | -0.70565400 | 4.90103600  |
| C                 | -2.60602600 | -1.34151100 | 4.78494700  |
| H                 | -3.99120200 | -0.43762100 | 3.40632500  |
| H                 | -0.99522700 | -2.04689500 | 6.02963800  |
| H                 | -3.36912700 | -1.92735400 | 5.29529100  |
| C                 | 3.81161000  | 0.92782400  | 0.50224400  |
| C                 | 5.13962200  | 0.49797800  | 0.54317200  |
| C                 | 3.37553700  | 1.63408700  | -0.62523400 |
| C                 | 6.01274200  | 0.75951900  | -0.50849500 |
| H                 | 5.48946500  | -0.05771000 | 1.41506700  |
| C                 | 4.24400700  | 1.89478400  | -1.67905100 |
| H                 | 2.33988100  | 1.97736100  | -0.68279300 |
| C                 | 5.56622600  | 1.45760300  | -1.62636600 |
| H                 | 7.04450900  | 0.41425400  | -0.45482900 |
| H                 | 3.88639800  | 2.44906700  | -2.54598200 |
| H                 | 6.24531000  | 1.66435100  | -2.45195400 |
| P                 | 1.16813200  | 0.09934700  | 1.24784500  |
| C                 | 0.31151100  | -3.26963600 | -1.46012200 |
| C                 | -2.24935000 | -3.06311500 | -0.50858900 |
| C                 | -1.95004100 | -4.14218200 | -1.55416100 |
| C                 | -0.49635000 | -4.56137600 | -1.37631300 |
| H                 | 0.18216500  | -2.85765800 | -2.47389400 |
| H                 | -2.38817100 | -3.54996400 | 0.47166400  |
| H                 | -2.65433200 | -4.98160600 | -1.47704800 |
| H                 | -2.05784400 | -3.72321300 | -2.56762200 |

|    |             |             |             |
|----|-------------|-------------|-------------|
| H  | -0.36966900 | -5.04422000 | -0.39351700 |
| H  | -0.17198000 | -5.28775900 | -2.13559300 |
| C  | -3.40909500 | -2.13555000 | -0.75767600 |
| C  | -4.03674200 | -1.99615300 | -1.99633900 |
| C  | -3.82780200 | -1.31214200 | 0.29267400  |
| C  | -5.04733900 | -1.05249200 | -2.17996900 |
| H  | -3.74877100 | -2.62672700 | -2.83723800 |
| C  | -4.83197900 | -0.37217600 | 0.11380700  |
| H  | -3.34026200 | -1.40341100 | 1.26616200  |
| C  | -5.44679700 | -0.23521000 | -1.12921200 |
| H  | -5.52404200 | -0.96037700 | -3.15496000 |
| H  | -5.13240500 | 0.26180600  | 0.94783900  |
| H  | -6.23080900 | 0.50612100  | -1.27541400 |
| C  | 1.77747000  | -3.29191500 | -1.15181600 |
| C  | 2.56102800  | -2.20683400 | -1.56555800 |
| C  | 2.38861800  | -4.31664800 | -0.42741400 |
| C  | 3.90927800  | -2.13464600 | -1.24570200 |
| H  | 2.09230200  | -1.40436100 | -2.13856200 |
| C  | 3.74252100  | -4.24536100 | -0.10288200 |
| H  | 1.80769600  | -5.18225000 | -0.10911300 |
| C  | 4.50384300  | -3.15179400 | -0.50101900 |
| H  | 4.49612200  | -1.27458600 | -1.56632600 |
| H  | 4.20219600  | -5.05306400 | 0.46523500  |
| H  | 5.55987900  | -3.09095700 | -0.24053700 |
| P  | -0.64810000 | -2.06739300 | -0.36957300 |
| C  | 1.22818800  | -1.69729000 | 1.73484500  |
| C  | -0.03581500 | -2.47029700 | 1.34334800  |
| H  | 1.40943700  | -1.80283400 | 2.81554100  |
| H  | 2.10508000  | -2.11432600 | 1.21683800  |
| H  | 0.12732500  | -3.55402100 | 1.45100100  |
| H  | -0.86348700 | -2.19928200 | 2.01863800  |
| Cu | -0.61941100 | 0.22902600  | -0.46094900 |
| C  | -2.08070700 | 2.74430100  | -0.38977300 |
| O  | -1.54052100 | 1.74480800  | 0.37889500  |
| C  | -1.10642000 | 0.39203500  | -2.99261300 |
| C  | 0.06474900  | -0.10420700 | -3.69400200 |
| C  | 0.08833300  | -1.24018700 | -4.40171900 |
| H  | 0.96397100  | 0.51885400  | -3.63289300 |
| H  | -0.80295600 | -1.86677300 | -4.48525200 |
| H  | 0.97774600  | -1.57791300 | -4.92924600 |
| C  | -1.18852100 | 1.62688700  | -2.45030000 |
| C  | -2.40358900 | 2.20298400  | -1.80969000 |
| H  | -0.30789400 | 2.27837900  | -2.51030100 |
| H  | -2.80888700 | 3.00503400  | -2.45056600 |

|   |             |             |             |
|---|-------------|-------------|-------------|
| H | -3.18138900 | 1.42641700  | -1.71132800 |
| H | -1.98995600 | -0.25818000 | -2.97067100 |
| C | -1.11476400 | 3.93245800  | -0.55295800 |
| C | -1.46708000 | 5.09330700  | -1.24915100 |
| C | 0.17852500  | 3.85261900  | -0.03752400 |
| C | -0.55838400 | 6.13178800  | -1.42585400 |
| H | -2.46946000 | 5.19251000  | -1.66925500 |
| C | 1.09682200  | 4.88417600  | -0.21555000 |
| H | 0.44461000  | 2.94458800  | 0.50223000  |
| C | 0.73189800  | 6.03118800  | -0.91197900 |
| H | -0.85876300 | 7.02487100  | -1.97340000 |
| H | 2.10554300  | 4.78708600  | 0.18934900  |
| H | 1.44615500  | 6.84104800  | -1.05428000 |
| C | -3.38075400 | 3.23052900  | 0.26295000  |
| H | -3.16214600 | 3.58190800  | 1.28012900  |
| H | -3.87561000 | 4.04408500  | -0.28684700 |
| H | -4.07924300 | 2.38392100  | 0.33389100  |

**(Z)-(R)-TS3'**

|   |             |             |            |
|---|-------------|-------------|------------|
| C | 0.09093500  | 1.38178300  | 3.12902500 |
| C | 2.23545200  | -0.33769600 | 3.11283100 |
| C | 1.85275600  | 0.32476000  | 4.44218300 |
| C | 0.35260700  | 0.58983700  | 4.41249100 |
| H | 0.62024500  | 2.34614800  | 3.22171100 |
| H | 1.93831000  | -1.39700200 | 3.16772000 |
| H | 2.15695200  | -0.30068600 | 5.29285100 |
| H | 2.37004400  | 1.29006500  | 4.55708500 |
| H | -0.20163900 | -0.36297500 | 4.39029900 |
| H | 0.00516800  | 1.14233800  | 5.29613700 |
| C | 3.67391500  | -0.27833700 | 2.68144800 |
| C | 4.21618000  | -1.33581500 | 1.93978100 |
| C | 4.49176500  | 0.83045500  | 2.92694100 |
| C | 5.51070100  | -1.27681500 | 1.43712900 |
| H | 3.60951000  | -2.22014600 | 1.74770900 |
| C | 5.78830800  | 0.89283000  | 2.42506400 |
| H | 4.11785000  | 1.66563300  | 3.51909100 |
| C | 6.30264400  | -0.15623100 | 1.67017300 |
| H | 5.89979400  | -2.11775500 | 0.86428700 |
| H | 6.40113200  | 1.76894600  | 2.63215600 |
| H | 7.31715100  | -0.10574000 | 1.27843800 |
| C | -1.33881300 | 1.65288800  | 2.76368400 |
| C | -1.74545300 | 2.95905100  | 2.47786000 |
| C | -2.28276300 | 0.62459100  | 2.67198200 |
| C | -3.06430900 | 3.23841300  | 2.12866200 |

|   |             |             |             |
|---|-------------|-------------|-------------|
| H | -1.01357300 | 3.76788900  | 2.53419400  |
| C | -3.60287800 | 0.90221000  | 2.33663500  |
| H | -1.98087200 | -0.41291500 | 2.82812600  |
| C | -3.99846000 | 2.20953500  | 2.06501200  |
| H | -3.36011900 | 4.26468500  | 1.90928200  |
| H | -4.31959800 | 0.08624300  | 2.25378900  |
| H | -5.02994200 | 2.41589000  | 1.78256400  |
| P | 1.02695600  | 0.39927100  | 1.83080800  |
| C | 0.61998600  | 1.97871400  | -2.44662200 |
| C | 2.43955600  | -0.02329600 | -2.89224700 |
| C | 1.57258500  | 0.36753000  | -4.08916800 |
| C | 1.18753800  | 1.82553900  | -3.86902500 |
| H | -0.45652200 | 1.74856000  | -2.46867300 |
| H | 3.32989000  | 0.63032200  | -2.89125500 |
| H | 2.10383300  | 0.21212700  | -5.03829900 |
| H | 0.66454800  | -0.25719400 | -4.12290100 |
| H | 2.08828600  | 2.44505100  | -3.98995300 |
| H | 0.46134800  | 2.18234700  | -4.61149400 |
| C | 2.88751500  | -1.44714100 | -2.76792800 |
| C | 2.05215900  | -2.51830400 | -3.09797900 |
| C | 4.15606900  | -1.72717400 | -2.25150100 |
| C | 2.48114200  | -3.83031400 | -2.93143000 |
| H | 1.04810100  | -2.32813400 | -3.47998600 |
| C | 4.58367700  | -3.03933300 | -2.07499200 |
| H | 4.81773400  | -0.89970000 | -1.98636900 |
| C | 3.74760400  | -4.09698300 | -2.41770000 |
| H | 1.81843800  | -4.65213900 | -3.20004800 |
| H | 5.57860800  | -3.23467500 | -1.67631000 |
| H | 4.07946500  | -5.12504200 | -2.28512500 |
| C | 0.78806600  | 3.32014300  | -1.78887700 |
| C | -0.22281100 | 3.80172800  | -0.94907700 |
| C | 1.95318100  | 4.08351400  | -1.91664000 |
| C | -0.07486500 | 4.99975500  | -0.25915300 |
| H | -1.13428200 | 3.21463700  | -0.83470100 |
| C | 2.10604800  | 5.28063000  | -1.22395400 |
| H | 2.76356400  | 3.73948100  | -2.56057000 |
| C | 1.09336600  | 5.74482500  | -0.39026300 |
| H | -0.88280100 | 5.35068900  | 0.38304400  |
| H | 3.02412700  | 5.85485700  | -1.33997800 |
| H | 1.21260100  | 6.68394100  | 0.14743300  |
| P | 1.37893200  | 0.53300600  | -1.45081900 |
| C | 1.98336200  | 1.75338600  | 0.99253700  |
| C | 2.63095700  | 1.28081000  | -0.30438400 |
| H | 2.73407100  | 2.18363500  | 1.67042600  |

|    |             |             |             |
|----|-------------|-------------|-------------|
| H  | 1.24767800  | 2.54669100  | 0.78208400  |
| H  | 3.17114600  | 2.10457500  | -0.79322800 |
| H  | 3.36398600  | 0.48036300  | -0.10332800 |
| Cu | 0.21504800  | -0.91579200 | -0.02891600 |
| C  | -2.74148700 | -1.45464800 | -0.95209200 |
| O  | -1.73164600 | -1.49333000 | 0.01961800  |
| C  | -3.38228800 | 2.18073300  | -1.51140300 |
| C  | -2.74577000 | 1.08000200  | -1.07382100 |
| C  | -2.55709600 | -0.19571300 | -1.81933400 |
| H  | -2.33233200 | 1.08363300  | -0.06089500 |
| H  | -1.52032600 | -0.26684600 | -2.20069400 |
| H  | -3.20914100 | -0.24638900 | -2.70392100 |
| C  | -3.98677400 | 2.37388700  | -2.81675500 |
| C  | -4.59714500 | 3.50469200  | -3.19023200 |
| H  | -3.93069500 | 1.54702900  | -3.52939800 |
| H  | -5.04214600 | 3.62395900  | -4.17544900 |
| H  | -4.66898600 | 4.35698500  | -2.51362500 |
| H  | -3.46701300 | 3.03042600  | -0.82592500 |
| C  | -0.84469400 | -3.82573600 | 0.79551200  |
| C  | -1.64727400 | -5.01059300 | 0.47690300  |
| H  | -1.46388000 | -2.70557800 | 0.37451900  |
| C  | -2.52455200 | -5.61915200 | 1.28302200  |
| H  | -1.52662600 | -5.39860600 | -0.54232400 |
| H  | -3.11549100 | -6.47069900 | 0.95378200  |
| H  | -2.67982000 | -5.28187300 | 2.30976500  |
| C  | 0.35668200  | -3.57834300 | 0.04347100  |
| H  | 0.34837800  | -3.93157500 | -0.99709700 |
| C  | 1.41663000  | -2.80322400 | 0.42667900  |
| H  | 1.55198200  | -2.59254400 | 1.48940100  |
| H  | 2.28467200  | -2.68118300 | -0.22204800 |
| H  | -0.75369800 | -3.61546500 | 1.87416600  |
| C  | -4.10865700 | -1.49180200 | -0.26181400 |
| C  | -4.25447800 | -2.23312400 | 0.91475500  |
| C  | -5.24024200 | -0.86246800 | -0.78482800 |
| C  | -5.48600400 | -2.33637900 | 1.55164800  |
| H  | -3.38510200 | -2.73568200 | 1.33609800  |
| C  | -6.47200500 | -0.94772200 | -0.14025100 |
| H  | -5.17083500 | -0.28253000 | -1.70460500 |
| C  | -6.60145000 | -1.68427400 | 1.03174100  |
| H  | -5.57225200 | -2.92774700 | 2.46278400  |
| H  | -7.33553100 | -0.43488800 | -0.56252800 |
| H  | -7.56572500 | -1.75562600 | 1.53320000  |
| C  | -2.65114100 | -2.66897900 | -1.88635800 |
| H  | -1.65358800 | -2.70709400 | -2.35427400 |

|   |             |             |             |
|---|-------------|-------------|-------------|
| H | -2.81670700 | -3.60137400 | -1.33263500 |
| H | -3.41078400 | -2.61276500 | -2.67876000 |

**(E)-(R)-TS3'**

|   |             |             |             |
|---|-------------|-------------|-------------|
| C | -0.49441600 | 1.80551700  | 2.79125200  |
| C | 1.74944800  | 0.28587200  | 3.20947300  |
| C | 1.21316200  | 1.09956900  | 4.39332000  |
| C | -0.28602600 | 1.24511100  | 4.20326700  |
| H | -0.03974500 | 2.81210400  | 2.76909800  |
| H | 1.51551700  | -0.77331100 | 3.40118300  |
| H | 1.47926000  | 0.61916900  | 5.34511700  |
| H | 1.66498200  | 2.10355200  | 4.40787900  |
| H | -0.78575300 | 0.26482300  | 4.28225900  |
| H | -0.75052000 | 1.90266400  | 4.95176900  |
| C | 3.22315600  | 0.39074200  | 2.93688400  |
| C | 3.94508800  | -0.74999700 | 2.56797400  |
| C | 3.91377900  | 1.60675900  | 3.01167400  |
| C | 5.29947400  | -0.67718800 | 2.26308900  |
| H | 3.43362100  | -1.71175400 | 2.52225800  |
| C | 5.26683400  | 1.68411000  | 2.69942700  |
| H | 3.39159600  | 2.51167700  | 3.32250400  |
| C | 5.96570700  | 0.54322300  | 2.31734900  |
| H | 5.83847100  | -1.58448700 | 1.99462400  |
| H | 5.77918200  | 2.64294900  | 2.76433900  |
| H | 7.02668900  | 0.60265700  | 2.08043700  |
| C | -1.94483500 | 1.92600500  | 2.41478300  |
| C | -2.58361300 | 3.15506000  | 2.61654000  |
| C | -2.70418400 | 0.83948800  | 1.96938500  |
| C | -3.94802300 | 3.29848700  | 2.39136200  |
| H | -1.99758900 | 4.00739900  | 2.96619300  |
| C | -4.06993600 | 0.98615100  | 1.73575400  |
| H | -2.22782400 | -0.12125100 | 1.74989600  |
| C | -4.69482400 | 2.20999500  | 1.95105900  |
| H | -4.42601900 | 4.26432200  | 2.55195000  |
| H | -4.64108500 | 0.13610900  | 1.36298600  |
| H | -5.76029400 | 2.31981400  | 1.75597400  |
| P | 0.61935500  | 0.72107800  | 1.72990600  |
| C | 0.91556800  | 1.46648200  | -2.85893500 |
| C | 2.90116400  | -0.39128000 | -2.55236700 |
| C | 2.22197900  | -0.37951900 | -3.92138300 |
| C | 1.69611900  | 1.03632900  | -4.11750700 |
| H | -0.14058000 | 1.18255200  | -2.97847900 |
| H | 3.70890400  | 0.36246900  | -2.56826700 |
| H | 2.91570700  | -0.68415800 | -4.71715500 |

|    |             |             |             |
|----|-------------|-------------|-------------|
| H  | 1.38110900  | -1.09318200 | -3.93627200 |
| H  | 2.54945600  | 1.71154900  | -4.27677500 |
| H  | 1.06089900  | 1.12290600  | -5.00887400 |
| C  | 3.46546700  | -1.68751700 | -2.05628500 |
| C  | 2.84376600  | -2.91433400 | -2.30867900 |
| C  | 4.62942600  | -1.68054900 | -1.28253000 |
| C  | 3.37334300  | -4.09722500 | -1.80519100 |
| H  | 1.93020900  | -2.94933900 | -2.90323000 |
| C  | 5.16101500  | -2.86322900 | -0.77803200 |
| H  | 5.12765600  | -0.73073400 | -1.07618600 |
| C  | 4.53382500  | -4.07728700 | -1.03634900 |
| H  | 2.87459100  | -5.04278600 | -2.01443100 |
| H  | 6.07772800  | -2.83638200 | -0.19011300 |
| H  | 4.94708100  | -5.00475500 | -0.64425300 |
| C  | 0.96263500  | 2.93254600  | -2.53213100 |
| C  | -0.20500500 | 3.58778100  | -2.12925100 |
| C  | 2.15108500  | 3.67098400  | -2.56943300 |
| C  | -0.18576400 | 4.92647600  | -1.75324200 |
| H  | -1.14314700 | 3.03372700  | -2.11604700 |
| C  | 2.17515900  | 5.00921100  | -2.19088900 |
| H  | 3.07802300  | 3.19559100  | -2.89512100 |
| C  | 1.00726300  | 5.64193300  | -1.77478100 |
| H  | -1.11437100 | 5.40843800  | -1.44919100 |
| H  | 3.11311900  | 5.56167900  | -2.22535100 |
| H  | 1.02650500  | 6.68977000  | -1.47992600 |
| P  | 1.54856400  | 0.31592200  | -1.46288400 |
| C  | 1.55542200  | 2.00586000  | 0.76624700  |
| C  | 2.48407200  | 1.37954000  | -0.27110400 |
| H  | 2.11586800  | 2.67404900  | 1.43586200  |
| H  | 0.78448300  | 2.62066500  | 0.26878000  |
| H  | 3.05559400  | 2.15549500  | -0.79852500 |
| H  | 3.20934900  | 0.70296400  | 0.21179400  |
| Cu | 0.28017100  | -0.98512300 | 0.00992900  |
| C  | -2.51995900 | -1.74920800 | -1.19608200 |
| O  | -1.63680900 | -1.65979500 | -0.11242700 |
| C  | -3.37115200 | 1.73048600  | -1.87572300 |
| C  | -2.51856200 | 0.78277200  | -1.45744400 |
| C  | -2.29962700 | -0.53076100 | -2.11613800 |
| H  | -1.94061000 | 0.96839700  | -0.54502100 |
| H  | -1.24841200 | -0.61595900 | -2.44952300 |
| H  | -2.91866000 | -0.60832600 | -3.02317400 |
| C  | -3.55232500 | 2.99302300  | -1.18453100 |
| C  | -4.36669500 | 3.97459500  | -1.58816200 |
| H  | -2.96724700 | 3.12072500  | -0.26738600 |

|   |             |             |             |
|---|-------------|-------------|-------------|
| H | -4.47213400 | 4.89901100  | -1.02358500 |
| H | -4.96766800 | 3.88099300  | -2.49332000 |
| H | -3.97069000 | 1.56521900  | -2.77774900 |
| C | -0.75489700 | -3.84398000 | 1.00941700  |
| C | -1.41306000 | -5.09804100 | 0.63016800  |
| H | -1.36132000 | -2.81652300 | 0.38980600  |
| C | -2.40813200 | -5.70782100 | 1.28374500  |
| H | -1.06599000 | -5.53953800 | -0.31268400 |
| H | -2.87293900 | -6.61514600 | 0.90489500  |
| H | -2.79221400 | -5.31704100 | 2.22784600  |
| C | 0.54657400  | -3.55418700 | 0.47349900  |
| H | 0.76795700  | -4.00961900 | -0.50180500 |
| C | 1.45464900  | -2.64390700 | 0.95064400  |
| H | 1.37034700  | -2.31112700 | 1.98836200  |
| H | 2.42552500  | -2.52556300 | 0.46697700  |
| H | -0.88971100 | -3.55440100 | 2.06370600  |
| C | -3.95895100 | -1.83587900 | -0.68237100 |
| C | -4.20608300 | -2.35710700 | 0.59047700  |
| C | -5.05601200 | -1.47896000 | -1.47001900 |
| C | -5.50568200 | -2.50589200 | 1.06443800  |
| H | -3.36254600 | -2.64471300 | 1.21611200  |
| C | -6.35672600 | -1.61104800 | -0.99425400 |
| H | -4.90256600 | -1.08377100 | -2.47423900 |
| C | -6.58811200 | -2.12446200 | 0.27777700  |
| H | -5.67070700 | -2.91950200 | 2.05885900  |
| H | -7.19421500 | -1.31177300 | -1.62350600 |
| H | -7.60545400 | -2.23100300 | 0.65166900  |
| C | -2.24033700 | -3.01064700 | -2.02361000 |
| H | -1.18553500 | -3.01645200 | -2.34365400 |
| H | -2.43702900 | -3.91356300 | -1.43158000 |
| H | -2.87956400 | -3.04983800 | -2.91706300 |

**(R)-TS4**

|   |             |             |             |
|---|-------------|-------------|-------------|
| P | -1.50278900 | -0.96987500 | 0.16007800  |
| C | -0.61762500 | -2.44854800 | 0.78507700  |
| C | -2.80025500 | -1.57907200 | -0.97149300 |
| C | -2.41227600 | -0.36173700 | 1.61697500  |
| C | 0.49258900  | -2.21789800 | 1.64527200  |
| C | -0.92014000 | -3.73665600 | 0.34560600  |
| C | -2.43409900 | -2.29623400 | -2.10530300 |
| C | -4.11349600 | -1.12303400 | -0.87500100 |
| C | -3.24369000 | -1.18353800 | 2.36491000  |
| C | -2.24761200 | 0.96948800  | 1.99025300  |
| C | 0.78009500  | -0.93961300 | 2.35950800  |



|   |             |             |             |
|---|-------------|-------------|-------------|
| C | 1.25303300  | -3.32981400 | 1.94582900  |
| C | -0.14314900 | -4.85132000 | 0.69003100  |
| H | -1.78968900 | -3.89043300 | -0.29099600 |
| C | -3.32357300 | -2.56596300 | -3.14962800 |
| H | -1.40487000 | -2.64955200 | -2.19114400 |
| C | -5.02658200 | -1.26447400 | -1.91894100 |
| H | -4.41205900 | -0.59572400 | 0.02584700  |
| C | -4.01710200 | -0.69416000 | 3.42235400  |
| H | -3.30739100 | -2.23819800 | 2.09418600  |
| C | -2.98591500 | 1.52895700  | 3.03044900  |
| H | -1.54230900 | 1.57751200  | 1.42360700  |
| C | 1.54223600  | 0.16305600  | 1.87821500  |
| C | 0.31741300  | -0.82756700 | 3.65568600  |
| C | 0.95395100  | -4.60602800 | 1.47790200  |
| H | -0.38960300 | -5.85376200 | 0.34801400  |
| C | -4.58410200 | -1.93268400 | -3.08521600 |
| C | -3.94381800 | 0.69662900  | 3.65935700  |
| P | 1.91662100  | 0.22288800  | 0.07697800  |
| C | 1.82032000  | 1.24376200  | 2.71475200  |
| C | 0.58622800  | 0.26715800  | 4.47045500  |
| C | 3.03142400  | 1.65489600  | -0.12882300 |
| C | 2.98596600  | -1.23776100 | -0.15943100 |
| C | 1.35731700  | 1.31587700  | 4.03644700  |
| H | 2.40299000  | 2.07844300  | 2.32907100  |
| C | 4.35538800  | 1.55558500  | -0.53110700 |
| C | 2.46700800  | 2.92284000  | 0.02301300  |
| C | 4.12336700  | -1.44492900 | 0.61141600  |
| C | 2.63290300  | -2.19140600 | -1.11135000 |
| H | 1.57949200  | 2.16604900  | 4.67693200  |
| C | 5.16023900  | 2.67970100  | -0.75046000 |
| H | 4.76871500  | 0.56814300  | -0.71250000 |
| C | 3.23589400  | 4.08122500  | -0.06578300 |
| H | 1.39864800  | 2.98860000  | 0.22847400  |
| C | 5.00285900  | -2.50754800 | 0.37763300  |
| H | 4.34119800  | -0.73434400 | 1.40943400  |
| C | 3.44383300  | -3.29061500 | -1.38477100 |
| H | 1.68688300  | -2.06099200 | -1.63405100 |
| C | 4.60007200  | 3.93370600  | -0.42203100 |
| C | 4.68563700  | -3.35254300 | -0.70653900 |
| C | 2.91084900  | -4.67757800 | 2.47158000  |
| H | 3.70228100  | -4.58236100 | 1.70299100  |
| H | 3.29968800  | -5.10894000 | 3.39956800  |
| O | 2.36539800  | -3.39430000 | 2.73413000  |
| O | 1.86795000  | -5.49199800 | 1.96629000  |

|    |             |             |             |
|----|-------------|-------------|-------------|
| H  | -0.92012900 | -1.64014500 | 6.35575100  |
| C  | -0.90772500 | -0.99058300 | 5.47495300  |
| H  | -1.91429200 | -0.58218700 | 5.25470700  |
| O  | -0.00347800 | 0.08042500  | 5.68636300  |
| O  | -0.44688300 | -1.72134500 | 4.34962300  |
| O  | -5.42756600 | -1.97143200 | -4.17057800 |
| O  | -4.82663000 | 1.29299100  | 4.53120600  |
| O  | 5.60130600  | -4.28598400 | -1.13839400 |
| O  | 5.34679300  | 5.08785200  | -0.50907100 |
| C  | -6.08493900 | 1.55479800  | 3.94282800  |
| H  | -6.66032800 | 2.14097200  | 4.66748800  |
| H  | -5.97954400 | 2.12985100  | 3.01084400  |
| H  | -6.63511100 | 0.62935800  | 3.71485700  |
| C  | -2.70187600 | 2.96588100  | 3.49496200  |
| C  | -4.85447800 | -1.72219300 | 4.21026100  |
| C  | -6.46480000 | -0.75365400 | -1.74571200 |
| C  | -5.06336600 | -1.08722700 | -5.21543700 |
| H  | -5.66522900 | -1.36022200 | -6.08898700 |
| H  | -5.26632500 | -0.03912400 | -4.94977100 |
| H  | -3.99662300 | -1.16946900 | -5.46797200 |
| C  | -2.82729200 | -3.54233900 | -4.23526200 |
| C  | 6.22000600  | -2.63392100 | 1.31724600  |
| C  | 2.96039600  | -4.41067600 | -2.31924600 |
| C  | 6.57952000  | -3.72557900 | -1.99191700 |
| H  | 7.19809200  | -2.97771400 | -1.47253400 |
| H  | 7.21928800  | -4.54878600 | -2.32749300 |
| H  | 6.11810700  | -3.24106800 | -2.86536400 |
| C  | 6.56455600  | 2.45314400  | -1.34548400 |
| C  | 2.57719700  | 5.45106800  | 0.15848700  |
| C  | 6.29530100  | 5.33515800  | 0.50519100  |
| H  | 6.23981600  | 6.39601800  | 0.77932600  |
| H  | 6.09637700  | 4.72917600  | 1.40117900  |
| H  | 7.31604800  | 5.13181400  | 0.15082100  |
| Cu | -0.13303500 | 0.52416800  | -1.01609300 |
| C  | -1.81818500 | 2.90096900  | -1.51715500 |
| O  | -0.72870400 | 2.48171700  | -0.99248700 |
| C  | -1.88404500 | 2.02318100  | -3.53384200 |
| C  | -3.26928000 | 2.06244100  | -3.96221400 |
| C  | -3.90241200 | 3.06514300  | -4.59103500 |
| H  | -3.85510100 | 1.17625200  | -3.67610600 |
| H  | -3.37411500 | 3.97122800  | -4.89165000 |
| H  | -4.96304600 | 3.00723900  | -4.83395200 |
| C  | -1.29175800 | 0.74971000  | -3.34515400 |
| C  | 0.04849300  | 0.47366000  | -3.16466100 |

|   |             |             |             |
|---|-------------|-------------|-------------|
| H | -1.98522600 | -0.09606000 | -3.26657900 |
| H | 0.39445500  | -0.56252600 | -3.22459300 |
| H | 0.79855700  | 1.24379900  | -3.36344700 |
| C | -1.82985300 | 4.30674300  | -2.01943900 |
| C | -2.99479700 | 5.07545000  | -2.09536500 |
| C | -0.62739900 | 4.87915400  | -2.45901200 |
| C | -2.95847000 | 6.37744400  | -2.59200800 |
| H | -3.94388900 | 4.66731100  | -1.75517200 |
| C | -0.59230200 | 6.16907500  | -2.96331700 |
| H | 0.27817400  | 4.27109400  | -2.40570300 |
| C | -1.76209900 | 6.92762900  | -3.03184300 |
| H | -3.87726700 | 6.96112900  | -2.63576600 |
| H | 0.35135700  | 6.59059700  | -3.30943200 |
| H | -1.73531900 | 7.94232300  | -3.42655300 |
| C | -3.12128800 | 2.34779600  | -0.98781400 |
| H | -3.32233400 | 2.76635100  | 0.01304000  |
| H | -3.97988900 | 2.56974100  | -1.63069800 |
| H | -3.04267200 | 1.26012900  | -0.88496900 |
| H | -1.22726800 | 2.79893100  | -3.93636500 |
| C | 1.11637900  | 5.30304500  | 0.59924800  |
| H | 0.49711100  | 4.75335600  | -0.12038200 |
| H | 1.04019900  | 4.79505000  | 1.57405900  |
| H | 0.67299500  | 6.30239500  | 0.70802100  |
| C | 3.27687500  | 6.25543900  | 1.26306500  |
| H | 3.44677100  | 5.64053800  | 2.15940800  |
| H | 4.23290800  | 6.67040300  | 0.93509600  |
| H | 2.64161000  | 7.10242400  | 1.55864100  |
| C | 2.60761300  | 6.24641600  | -1.15200300 |
| H | 2.10099100  | 7.21412900  | -1.01888500 |
| H | 3.63550400  | 6.43338100  | -1.48329900 |
| H | 2.08094800  | 5.70015700  | -1.94632200 |
| C | 6.97060100  | 3.56656000  | -2.32060300 |
| H | 7.07699000  | 4.54698900  | -1.85258700 |
| H | 7.92998300  | 3.30772700  | -2.79036900 |
| H | 6.22196400  | 3.66898500  | -3.11858500 |
| C | 6.60232700  | 1.15469900  | -2.17166300 |
| H | 6.50610300  | 0.24618700  | -1.55982700 |
| H | 5.81212300  | 1.13788800  | -2.93463200 |
| H | 7.57112600  | 1.08656300  | -2.68509900 |
| C | 7.61142300  | 2.29283600  | -0.23494900 |
| H | 7.35999300  | 1.43871700  | 0.40971800  |
| H | 8.60155600  | 2.10115000  | -0.67452700 |
| H | 7.69717800  | 3.17502100  | 0.40746800  |
| C | 5.75473500  | -2.50576900 | 2.77935400  |

|   |             |             |             |
|---|-------------|-------------|-------------|
| H | 5.19936200  | -1.58558800 | 2.98941300  |
| H | 5.11288400  | -3.34795200 | 3.06891300  |
| H | 6.63271100  | -2.51717600 | 3.43998200  |
| C | 6.97617100  | -3.96648700 | 1.24866000  |
| H | 7.55367300  | -4.10005400 | 0.32949300  |
| H | 7.68802200  | -4.00281300 | 2.08555500  |
| H | 6.29911300  | -4.82501300 | 1.34490300  |
| C | 7.19893300  | -1.48713100 | 1.03344600  |
| H | 7.58180300  | -1.51584600 | 0.00292000  |
| H | 6.71765600  | -0.50951100 | 1.18198200  |
| H | 8.06229800  | -1.54318500 | 1.71230900  |
| C | 2.99422400  | -5.74424500 | -1.55899000 |
| H | 2.35036200  | -5.70665800 | -0.66845100 |
| H | 2.62462700  | -6.55291800 | -2.20647800 |
| H | 4.01022700  | -6.00130800 | -1.24022900 |
| C | 1.51063900  | -4.17948900 | -2.76312600 |
| H | 0.82156600  | -4.11106500 | -1.90559700 |
| H | 1.40000700  | -3.27296300 | -3.37729700 |
| H | 1.18679200  | -5.02963900 | -3.38004300 |
| C | 3.80569200  | -4.53035200 | -3.59340400 |
| H | 3.89760900  | -3.56067600 | -4.10391800 |
| H | 4.80810500  | -4.91789900 | -3.38602500 |
| H | 3.32343800  | -5.22912800 | -4.29179900 |
| C | -2.25993000 | -4.78730300 | -3.52474100 |
| H | -1.39610200 | -4.56596800 | -2.88550400 |
| H | -3.02942100 | -5.26542300 | -2.90198400 |
| H | -1.92582300 | -5.51999200 | -4.27307200 |
| C | -3.90354600 | -4.07561800 | -5.18795200 |
| H | -4.76723800 | -4.47580400 | -4.64290700 |
| H | -4.26926600 | -3.32988100 | -5.89938400 |
| H | -3.46650500 | -4.89342600 | -5.77812900 |
| C | -1.70464300 | -2.89976200 | -5.05995500 |
| H | -0.87286200 | -2.55580500 | -4.42873600 |
| H | -1.30042700 | -3.62815000 | -5.77851000 |
| H | -2.06002700 | -2.03037400 | -5.63016100 |
| C | -7.43211000 | -1.94094100 | -1.84611400 |
| H | -8.46847400 | -1.59373800 | -1.72209700 |
| H | -7.35229400 | -2.44173300 | -2.81727300 |
| H | -7.22652000 | -2.67842900 | -1.05704300 |
| C | -6.84213800 | 0.30249000  | -2.79366600 |
| H | -6.98159500 | -0.13969500 | -3.78431400 |
| H | -7.79185800 | 0.77935600  | -2.51198100 |
| H | -6.07927000 | 1.09398800  | -2.86235200 |
| C | -6.67287200 | -0.10569000 | -0.37141500 |

|   |             |             |             |
|---|-------------|-------------|-------------|
| H | -6.46235400 | -0.79722500 | 0.45715700  |
| H | -6.05229000 | 0.79272200  | -0.23520800 |
| H | -7.72318300 | 0.20236500  | -0.28033300 |
| C | -3.97441500 | -2.94468800 | 4.52945500  |
| H | -3.59741400 | -3.45830800 | 3.63811400  |
| H | -3.10487900 | -2.66203400 | 5.13854800  |
| H | -4.56084500 | -3.67729600 | 5.10085700  |
| C | -5.38562000 | -1.23476700 | 5.56316600  |
| H | -6.17678100 | -0.48453200 | 5.48192500  |
| H | -5.80849100 | -2.09448800 | 6.10215300  |
| H | -4.58676600 | -0.80863100 | 6.18405100  |
| C | -6.03129100 | -2.19949600 | 3.34909000  |
| H | -6.72862600 | -1.38225000 | 3.11952600  |
| H | -5.68611600 | -2.61998000 | 2.39335800  |
| H | -6.59690500 | -2.98173700 | 3.87614200  |
| C | -2.35465500 | 2.93855600  | 4.98997100  |
| H | -1.48012500 | 2.29754300  | 5.17184200  |
| H | -2.10872800 | 3.95253700  | 5.33782500  |
| H | -3.18886800 | 2.56142200  | 5.59233400  |
| C | -3.88352000 | 3.91420200  | 3.25777600  |
| H | -4.73329300 | 3.69237600  | 3.91069500  |
| H | -3.57156500 | 4.94754900  | 3.46615000  |
| H | -4.22039900 | 3.87651400  | 2.21113800  |
| C | -1.49687400 | 3.56332600  | 2.75707100  |
| H | -0.59075300 | 2.95133500  | 2.87902700  |
| H | -1.67177600 | 3.69728900  | 1.67903800  |
| H | -1.28369200 | 4.55671000  | 3.17597900  |

**(R)-D**

|   |             |             |             |
|---|-------------|-------------|-------------|
| P | -1.49836900 | -1.04085000 | 0.15649500  |
| C | -0.59417900 | -2.45232300 | 0.89017500  |
| C | -2.74722400 | -1.75982900 | -0.96124000 |
| C | -2.44575200 | -0.34316700 | 1.54449600  |
| C | 0.49959500  | -2.13870100 | 1.74421600  |
| C | -0.86284500 | -3.77190400 | 0.52959100  |
| C | -2.33317400 | -2.49540900 | -2.06788100 |
| C | -4.08016900 | -1.36172000 | -0.89428900 |
| C | -3.24915200 | -1.12513400 | 2.36298100  |
| C | -2.33067400 | 1.02278200  | 1.78970400  |
| C | 0.74232800  | -0.80137000 | 2.36216600  |
| C | 1.27991400  | -3.21100900 | 2.12643300  |
| C | -0.06449200 | -4.84324800 | 0.95265800  |
| H | -1.72170000 | -3.98494300 | -0.10484200 |
| C | -3.19288800 | -2.82428800 | -3.11948500 |

|   |             |             |             |
|---|-------------|-------------|-------------|
| H | -1.29381400 | -2.82680700 | -2.11661500 |
| C | -4.96718800 | -1.56141000 | -1.95059500 |
| H | -4.41036400 | -0.82093500 | -0.01241000 |
| C | -4.03495800 | -0.57188900 | 3.37853000  |
| H | -3.27149300 | -2.20127700 | 2.18914700  |
| C | -3.08491800 | 1.64393600  | 2.78391900  |
| H | -1.66099900 | 1.60567600  | 1.15416900  |
| C | 1.48018000  | 0.28499000  | 1.80816200  |
| C | 0.25018900  | -0.60010200 | 3.63705000  |
| C | 1.01510500  | -4.52118100 | 1.73703600  |
| H | -0.28247200 | -5.87159000 | 0.67401000  |
| C | -4.47487900 | -2.23264100 | -3.09301200 |
| C | -4.00368400 | 0.83708400  | 3.49828800  |
| P | 1.88309700  | 0.23422100  | 0.01044700  |
| C | 1.71666700  | 1.43255600  | 2.56472400  |
| C | 0.47644600  | 0.56201900  | 4.36849600  |
| C | 2.97761600  | 1.66764700  | -0.27482000 |
| C | 2.98718300  | -1.21621500 | -0.09745500 |
| C | 1.23000800  | 1.59357600  | 3.86882900  |
| H | 2.28433000  | 2.25023600  | 2.12536200  |
| C | 4.31000500  | 1.56968500  | -0.65125300 |
| C | 2.39083700  | 2.93152000  | -0.18734600 |
| C | 4.11047900  | -1.32802600 | 0.71166800  |
| C | 2.67971000  | -2.25298500 | -0.97385300 |
| H | 1.41924100  | 2.49609100  | 4.44499200  |
| C | 5.10092800  | 2.69558500  | -0.90882700 |
| H | 4.74090700  | 0.58137900  | -0.78260700 |
| C | 3.15173600  | 4.09493400  | -0.29043200 |
| H | 1.31487700  | 2.98794900  | -0.01664700 |
| C | 5.01808100  | -2.38486300 | 0.59158600  |
| H | 4.28975300  | -0.54590900 | 1.44999200  |
| C | 3.52561900  | -3.34762300 | -1.14069600 |
| H | 1.74081700  | -2.19003700 | -1.52072700 |
| C | 4.52032800  | 3.95331100  | -0.63016600 |
| C | 4.74897500  | -3.32504000 | -0.42651700 |
| C | 2.95889400  | -4.48702200 | 2.76227000  |
| H | 3.76823000  | -4.42712500 | 2.00813200  |
| H | 3.33397600  | -4.85104900 | 3.72438400  |
| O | 2.38337700  | -3.20079100 | 2.92967100  |
| O | 1.94405500  | -5.35358000 | 2.28779100  |
| H | -1.04498900 | -1.22007100 | 6.36477700  |
| C | -1.01291600 | -0.64235400 | 5.43581800  |
| H | -2.01511400 | -0.26543800 | 5.14999400  |
| O | -0.12862200 | 0.45450200  | 5.58604700  |

|    |             |             |             |
|----|-------------|-------------|-------------|
| O  | -0.50570400 | -1.45528000 | 4.38797800  |
| O  | -5.28407900 | -2.30543700 | -4.20349100 |
| O  | -4.87758200 | 1.47966300  | 4.34625800  |
| O  | 5.69436900  | -4.27115600 | -0.75397500 |
| O  | 5.25085900  | 5.11420900  | -0.75362700 |
| C  | -6.16605400 | 1.66238300  | 3.79606900  |
| H  | -6.67783300 | 2.40683400  | 4.41593800  |
| H  | -6.11176500 | 2.02896200  | 2.76018800  |
| H  | -6.75365500 | 0.73171600  | 3.80611000  |
| C  | -2.84191500 | 3.12562500  | 3.11159700  |
| C  | -4.84059700 | -1.54891400 | 4.25794800  |
| C  | -6.42384000 | -1.09300200 | -1.81894100 |
| C  | -4.90471900 | -1.41129700 | -5.23151700 |
| H  | -5.48480400 | -1.67903200 | -6.12136400 |
| H  | -5.12569100 | -0.36871700 | -4.95799800 |
| H  | -3.83146400 | -1.48276400 | -5.46106500 |
| C  | -2.65203600 | -3.81658900 | -4.16740600 |
| C  | 6.20829500  | -2.40247000 | 1.57269300  |
| C  | 3.09838900  | -4.54841000 | -1.99885700 |
| C  | 6.69104300  | -3.76465900 | -1.61937800 |
| H  | 7.30673300  | -2.99369800 | -1.13152000 |
| H  | 7.33079500  | -4.60907600 | -1.89764300 |
| H  | 6.24921200  | -3.32675400 | -2.52681800 |
| C  | 6.51042000  | 2.46873500  | -1.49304400 |
| C  | 2.47799600  | 5.45995900  | -0.08421600 |
| C  | 6.21337500  | 5.39992200  | 0.23712400  |
| H  | 6.11195800  | 6.45241400  | 0.53005300  |
| H  | 6.07213000  | 4.77306800  | 1.12924100  |
| H  | 7.23135800  | 5.25351800  | -0.15173700 |
| Cu | -0.18122400 | 0.51606400  | -1.00864500 |
| C  | -1.90533900 | 2.64472100  | -1.84167000 |
| O  | -0.86868900 | 2.38610500  | -0.98994800 |
| C  | -1.57372800 | 2.04947300  | -3.30637800 |
| C  | -2.72226300 | 2.17575800  | -4.25802800 |
| C  | -2.90547100 | 3.17591800  | -5.11729700 |
| H  | -3.47845200 | 1.38317200  | -4.18581700 |
| H  | -2.18531400 | 3.99131000  | -5.19986000 |
| H  | -3.78520400 | 3.23185000  | -5.75587000 |
| C  | -1.12839700 | 0.62586400  | -3.23139200 |
| C  | 0.16310500  | 0.22805400  | -3.26700900 |
| H  | -1.91179800 | -0.14172700 | -3.18226900 |
| H  | 0.44089800  | -0.82725300 | -3.28992300 |
| H  | 0.97180200  | 0.95045900  | -3.39787000 |
| C  | -2.05208000 | 4.15980600  | -2.02850500 |

|   |             |             |             |
|---|-------------|-------------|-------------|
| C | -3.24659700 | 4.86175100  | -1.86004500 |
| C | -0.91828600 | 4.89060100  | -2.39903200 |
| C | -3.31025500 | 6.23890500  | -2.06645700 |
| H | -4.15419700 | 4.33558800  | -1.56782300 |
| C | -0.97609400 | 6.25956100  | -2.62015900 |
| H | 0.03024000  | 4.35878100  | -2.49746600 |
| C | -2.17900500 | 6.94363300  | -2.45623700 |
| H | -4.25762500 | 6.75920200  | -1.92682600 |
| H | -0.07585300 | 6.79905700  | -2.91519000 |
| H | -2.22996900 | 8.01808000  | -2.62784300 |
| C | -3.21980000 | 2.01152900  | -1.37042500 |
| H | -3.46027200 | 2.34413300  | -0.35059200 |
| H | -4.07519500 | 2.24056300  | -2.02269000 |
| H | -3.11084100 | 0.92126400  | -1.34384700 |
| H | -0.72663900 | 2.65225500  | -3.66709400 |
| C | 1.04601700  | 5.29672700  | 0.44002000  |
| H | 0.39245800  | 4.71209300  | -0.21930000 |
| H | 1.04003900  | 4.81612700  | 1.43189400  |
| H | 0.58743000  | 6.28953900  | 0.54866500  |
| C | 3.21327900  | 6.32094500  | 0.95377000  |
| H | 3.47037800  | 5.73768500  | 1.85074200  |
| H | 4.12472200  | 6.77082900  | 0.55322900  |
| H | 2.55949800  | 7.14471200  | 1.27298500  |
| C | 2.43452200  | 6.21035000  | -1.42004500 |
| H | 1.94482000  | 7.18700600  | -1.28788800 |
| H | 3.44253700  | 6.37954000  | -1.81639900 |
| H | 1.86085700  | 5.64395700  | -2.16637900 |
| C | 6.88132500  | 3.53568800  | -2.53214900 |
| H | 6.92679800  | 4.54846700  | -2.12715100 |
| H | 7.86097800  | 3.29570900  | -2.96911900 |
| H | 6.14385200  | 3.54656400  | -3.34695600 |
| C | 6.58007400  | 1.12663400  | -2.24326200 |
| H | 6.51767100  | 0.25443700  | -1.57643100 |
| H | 5.78564100  | 1.03978200  | -2.99705900 |
| H | 7.54668800  | 1.05817100  | -2.76083700 |
| C | 7.56977800  | 2.39364400  | -0.38517600 |
| H | 7.33425000  | 1.58096000  | 0.31605400  |
| H | 8.55670000  | 2.18209200  | -0.82288900 |
| H | 7.65658500  | 3.31610100  | 0.19684700  |
| C | 5.69851600  | -2.15091200 | 3.00389000  |
| H | 5.13695800  | -1.21688400 | 3.11600800  |
| H | 5.04738600  | -2.96464000 | 3.34818700  |
| H | 6.55648100  | -2.10007000 | 3.68828900  |
| C | 6.98942900  | -3.72023100 | 1.64171300  |



|   |             |             |             |
|---|-------------|-------------|-------------|
| H | 7.59515500  | -3.92099800 | 0.75356600  |
| H | 7.67832700  | -3.67161900 | 2.49698200  |
| H | 6.32688400  | -4.58208000 | 1.79255900  |
| C | 7.17312800  | -1.26507500 | 1.21268400  |
| H | 7.58985400  | -1.38113600 | 0.20169600  |
| H | 6.66656000  | -0.28986000 | 1.25429100  |
| H | 8.01504200  | -1.23695100 | 1.91970500  |
| C | 3.13583000  | -5.81642900 | -1.13426300 |
| H | 2.46634700  | -5.72118900 | -0.26728700 |
| H | 2.80250500  | -6.68294700 | -1.72405000 |
| H | 4.14701300  | -6.02290600 | -0.76681100 |
| C | 1.66171700  | -4.38887300 | -2.51151000 |
| H | 0.93718800  | -4.26498400 | -1.69084800 |
| H | 1.55712200  | -3.53983600 | -3.20448500 |
| H | 1.37935600  | -5.29445300 | -3.06668500 |
| C | 3.98834200  | -4.74401600 | -3.23338400 |
| H | 4.07717900  | -3.81245600 | -3.81117400 |
| H | 4.99095300  | -5.09236300 | -2.96800900 |
| H | 3.54330900  | -5.50252300 | -3.89316300 |
| C | -2.08366800 | -5.03419400 | -3.41252600 |
| H | -1.24864700 | -4.78047200 | -2.74710600 |
| H | -2.86431000 | -5.51676300 | -2.80764300 |
| H | -1.70758100 | -5.77404000 | -4.13360300 |
| C | -3.69293400 | -4.38763000 | -5.13714500 |
| H | -4.55995500 | -4.79973300 | -4.60663000 |
| H | -4.05972900 | -3.65991500 | -5.86708200 |
| H | -3.22342100 | -5.20380900 | -5.70430300 |
| C | -1.51855300 | -3.17563900 | -4.97718500 |
| H | -0.69012100 | -2.84929200 | -4.33345000 |
| H | -1.11231200 | -3.89979200 | -5.69860100 |
| H | -1.86178800 | -2.29681800 | -5.54065000 |
| C | -7.35824300 | -2.30448500 | -1.93371300 |
| H | -8.40523700 | -1.98218100 | -1.83425600 |
| H | -7.24663300 | -2.80914000 | -2.89931800 |
| H | -7.15244000 | -3.03217300 | -1.13596800 |
| C | -6.79798300 | -0.05300500 | -2.88326700 |
| H | -6.90463700 | -0.50273500 | -3.87475600 |
| H | -7.76315600 | 0.40769200  | -2.62853400 |
| H | -6.04793200 | 0.75145200  | -2.93373200 |
| C | -6.68218700 | -0.43987000 | -0.45592000 |
| H | -6.46915100 | -1.11887400 | 0.38204800  |
| H | -6.09036800 | 0.47776100  | -0.31710400 |
| H | -7.74294100 | -0.16283800 | -0.39101500 |
| C | -3.97104800 | -2.77538500 | 4.59255400  |

|   |             |             |            |
|---|-------------|-------------|------------|
| H | -3.70048500 | -3.37180300 | 3.71391000 |
| H | -3.03633300 | -2.48490000 | 5.09040300 |
| H | -4.52513200 | -3.43967500 | 5.26969100 |
| C | -5.28279400 | -0.97697300 | 5.61027800 |
| H | -6.06912900 | -0.22198900 | 5.53543700 |
| H | -5.67707200 | -1.79660300 | 6.22739200 |
| H | -4.44065500 | -0.52385800 | 6.15092100 |
| C | -6.06689600 | -2.05061100 | 3.48417700 |
| H | -6.74016300 | -1.23147800 | 3.19855600 |
| H | -5.76673400 | -2.56765600 | 2.56127400 |
| H | -6.64195100 | -2.76116400 | 4.09606300 |
| C | -2.43002900 | 3.24104800  | 4.58649200 |
| H | -1.53134500 | 2.63944500  | 4.79087400 |
| H | -2.19549700 | 4.28823300  | 4.82811600 |
| H | -3.22708400 | 2.90575500  | 5.25928500 |
| C | -4.06940500 | 4.00723600  | 2.85074800 |
| H | -4.88343000 | 3.80996800  | 3.55524500 |
| H | -3.78909100 | 5.06427800  | 2.96279500 |
| H | -4.44342400 | 3.87642600  | 1.82438600 |
| C | -1.69674000 | 3.69834300  | 2.26785000 |
| H | -0.76016500 | 3.14043600  | 2.41354900 |
| H | -1.90663200 | 3.70506000  | 1.18818400 |
| H | -1.51598300 | 4.73780300  | 2.57628400 |

**(R)-TS5**

|   |             |             |             |
|---|-------------|-------------|-------------|
| P | -1.90560800 | -0.12645800 | -0.08877800 |
| C | -1.38801200 | -1.06442300 | -1.58632200 |
| C | -3.16274100 | 1.07829700  | -0.66434300 |
| C | -2.94368600 | -1.40534000 | 0.72267000  |
| C | -0.50265300 | -2.16240900 | -1.39175000 |
| C | -1.82761700 | -0.72552300 | -2.86475200 |
| C | -2.83066100 | 2.03646600  | -1.61654200 |
| C | -4.44333500 | 1.10712300  | -0.11665300 |
| C | -3.93782900 | -2.03265100 | -0.01652000 |
| C | -2.76475400 | -1.77628100 | 2.05289300  |
| C | -0.08660900 | -2.72804100 | -0.07267200 |
| C | -0.12086300 | -2.82401100 | -2.54310300 |
| C | -1.42237900 | -1.41912900 | -4.01289600 |
| H | -2.53477600 | 0.09167800  | -2.98199600 |
| C | -3.74096600 | 2.99153800  | -2.08259800 |
| H | -1.82568900 | 2.01818900  | -2.03802700 |
| C | -5.38238900 | 2.07112900  | -0.47579000 |
| H | -4.71367700 | 0.35076600  | 0.61115200  |
| C | -4.83753900 | -2.93949200 | 0.54659500  |

|   |             |             |             |
|---|-------------|-------------|-------------|
| H | -4.02146900 | -1.79378500 | -1.07700200 |
| C | -3.65133400 | -2.64098800 | 2.69833600  |
| H | -1.90266800 | -1.38329400 | 2.58388700  |
| C | 0.94685300  | -2.24799800 | 0.78654400  |
| C | -0.71349400 | -3.88612000 | 0.34121600  |
| C | -0.55460600 | -2.46375300 | -3.81439200 |
| H | -1.77716700 | -1.14704300 | -5.00430900 |
| C | -4.98928400 | 3.04479000  | -1.42449300 |
| C | -4.74630800 | -3.12282900 | 1.94204000  |
| P | 1.69597600  | -0.62441500 | 0.35453500  |
| C | 1.26187100  | -2.92847400 | 1.96076700  |
| C | -0.38784500 | -4.55794900 | 1.51379600  |
| C | 3.22820000  | -0.40040200 | 1.34011800  |
| C | 2.42113100  | -1.03821500 | -1.27696100 |
| C | 0.60239700  | -4.10603200 | 2.35059300  |
| H | 2.05822700  | -2.54543100 | 2.59812200  |
| C | 4.44087300  | -0.15638600 | 0.70585300  |
| C | 3.17078300  | -0.23394800 | 2.72633600  |
| C | 3.21411100  | -2.17175900 | -1.41446600 |
| C | 2.21401100  | -0.21409500 | -2.37784600 |
| H | 0.86491000  | -4.63729500 | 3.26240300  |
| C | 5.61314800  | 0.16004200  | 1.39977100  |
| H | 4.48313700  | -0.19065600 | -0.37926500 |
| C | 4.31002300  | -0.00060100 | 3.49289900  |
| H | 2.20043300  | -0.28474200 | 3.21274100  |
| C | 3.90988400  | -2.46426500 | -2.59079600 |
| H | 3.31084300  | -2.83633400 | -0.55661100 |
| C | 2.86037500  | -0.44811000 | -3.59200200 |
| H | 1.51737400  | 0.61474300  | -2.26791300 |
| C | 5.54361500  | 0.10823900  | 2.80393700  |
| C | 3.79278100  | -1.51402000 | -3.62938800 |
| C | 0.98269100  | -4.02275400 | -4.03027200 |
| H | 1.96707700  | -3.55885500 | -4.23064300 |
| H | 0.97089100  | -5.07689500 | -4.32636000 |
| O | 0.69288000  | -3.91436900 | -2.64559000 |
| O | -0.02229900 | -3.31658400 | -4.73544000 |
| H | -2.31773800 | -6.48487600 | 0.11919700  |
| C | -2.16622000 | -5.52683600 | 0.62849000  |
| H | -3.10359000 | -5.16807600 | 1.09470700  |
| O | -1.16588100 | -5.67483700 | 1.62345900  |
| O | -1.70934200 | -4.55920200 | -0.30207000 |
| O | -5.89363500 | 4.03925000  | -1.72049200 |
| O | -5.73897300 | -3.80541000 | 2.60859200  |
| O | 4.58821600  | -1.61274200 | -4.74947300 |

|    |             |             |             |
|----|-------------|-------------|-------------|
| O  | 6.69496400  | 0.20184500  | 3.55360700  |
| C  | -6.88209700 | -3.00693000 | 2.84206400  |
| H  | -7.58066900 | -3.61423200 | 3.42755000  |
| H  | -6.62596900 | -2.09783100 | 3.40709600  |
| H  | -7.36979000 | -2.70127400 | 1.90332400  |
| C  | -3.39291500 | -3.09054300 | 4.14586800  |
| C  | -5.78852900 | -3.66414200 | -0.42614100 |
| C  | -6.81622500 | 1.96576300  | 0.07122100  |
| C  | -5.60810500 | 5.28541300  | -1.11735400 |
| H  | -4.64209500 | 5.69502800  | -1.44428300 |
| H  | -6.40940000 | 5.96955600  | -1.41758400 |
| H  | -5.59335600 | 5.20656000  | -0.01949600 |
| C  | -3.30327700 | 3.84792700  | -3.29103300 |
| C  | 4.70789500  | -3.78631500 | -2.64325200 |
| C  | 2.49190000  | 0.35894000  | -4.84688900 |
| C  | 5.88144800  | -1.07770800 | -4.55450700 |
| H  | 6.49848400  | -1.71957700 | -3.90751700 |
| H  | 6.35365900  | -1.00940000 | -5.54070200 |
| H  | 5.83522400  | -0.07460800 | -4.10358600 |
| C  | 6.83091500  | 0.56549700  | 0.54265400  |
| C  | 4.19436200  | 0.24927400  | 5.00536100  |
| C  | 7.41958400  | -1.00858500 | 3.60351400  |
| H  | 8.33311900  | -0.81072300 | 4.17493400  |
| H  | 6.84372500  | -1.80209700 | 4.10384800  |
| H  | 7.69312100  | -1.36449700 | 2.59902000  |
| Cu | -0.10351900 | 0.88618300  | 0.95337000  |
| C  | 2.74984700  | 0.10959900  | 5.49537100  |
| H  | 2.07104500  | 0.83637400  | 5.02846500  |
| H  | 2.34923600  | -0.90165200 | 5.32579600  |
| H  | 2.72079200  | 0.29767800  | 6.57684800  |
| C  | 5.03451200  | -0.72740200 | 5.83855600  |
| H  | 4.81549400  | -1.77137700 | 5.56919600  |
| H  | 6.10710900  | -0.54863200 | 5.72557600  |
| H  | 4.79202400  | -0.60300000 | 6.90347200  |
| C  | 4.64255700  | 1.68874500  | 5.29900000  |
| H  | 4.54120800  | 1.90232800  | 6.37323100  |
| H  | 5.68805200  | 1.85260400  | 5.01367100  |
| H  | 4.01927500  | 2.41005700  | 4.75007000  |
| C  | 7.99143400  | 1.20680100  | 1.31348300  |
| H  | 8.53986700  | 0.50374000  | 1.94785500  |
| H  | 8.71013500  | 1.60993700  | 0.58577600  |
| H  | 7.65269900  | 2.03683300  | 1.94575800  |
| C  | 6.38671200  | 1.62066100  | -0.48971000 |
| H  | 5.61641000  | 1.25168800  | -1.18233100 |

|   |             |             |             |
|---|-------------|-------------|-------------|
| H | 5.99402400  | 2.52189600  | 0.00067600  |
| H | 7.25222600  | 1.91650000  | -1.09966000 |
| C | 7.34947500  | -0.65055700 | -0.23315400 |
| H | 6.58005600  | -1.04034700 | -0.91525600 |
| H | 8.22332900  | -0.36915800 | -0.83979200 |
| H | 7.65176500  | -1.47305200 | 0.43163700  |
| C | 3.88774300  | -4.91004900 | -1.98140900 |
| H | 3.72705300  | -4.75315900 | -0.90826700 |
| H | 2.89948300  | -5.02821900 | -2.44154000 |
| H | 4.42953700  | -5.86000800 | -2.08543700 |
| C | 5.03165300  | -4.27855400 | -4.05962200 |
| H | 5.76669000  | -3.66039500 | -4.58170700 |
| H | 5.44432100  | -5.29513300 | -3.99306600 |
| H | 4.13345200  | -4.32266900 | -4.69097500 |
| C | 6.01161600  | -3.65961700 | -1.84528100 |
| H | 6.70328000  | -2.92619300 | -2.28111200 |
| H | 5.81457500  | -3.35603100 | -0.80679900 |
| H | 6.53149500  | -4.62857300 | -1.81980600 |
| C | 2.01925200  | -0.60820700 | -5.94309300 |
| H | 1.13808600  | -1.18047700 | -5.61533700 |
| H | 1.73497100  | -0.04104300 | -6.84174800 |
| H | 2.80533100  | -1.31713200 | -6.22373800 |
| C | 1.33562800  | 1.32563900  | -4.56912900 |
| H | 0.45339900  | 0.81297700  | -4.15719900 |
| H | 1.62203100  | 2.12919500  | -3.87612200 |
| H | 1.03353000  | 1.79967000  | -5.51305600 |
| C | 3.65780700  | 1.20541300  | -5.37284500 |
| H | 4.08939100  | 1.82426900  | -4.57220600 |
| H | 4.45228000  | 0.59596400  | -5.81439000 |
| H | 3.29472400  | 1.88601600  | -6.15647800 |
| C | -2.58476200 | 2.94238800  | -4.31182500 |
| H | -1.63997200 | 2.52589300  | -3.93769900 |
| H | -3.22875500 | 2.10887500  | -4.62879000 |
| H | -2.33403400 | 3.53020600  | -5.20548700 |
| C | -4.46102100 | 4.48702000  | -4.06869100 |
| H | -5.23009600 | 3.74763800  | -4.32708100 |
| H | -4.95087600 | 5.30782100  | -3.53872000 |
| H | -4.06365800 | 4.90159000  | -5.00582800 |
| C | -2.31148900 | 4.93364400  | -2.85723800 |
| H | -1.42046100 | 4.50008600  | -2.38297100 |
| H | -1.98353600 | 5.51026800  | -3.73479700 |
| H | -2.74003600 | 5.63753000  | -2.13140600 |
| C | -7.77440000 | 1.70505500  | -1.09948500 |
| H | -8.80617000 | 1.61371600  | -0.72889100 |

|   |             |             |             |
|---|-------------|-------------|-------------|
| H | -7.74481600 | 2.51723100  | -1.83292100 |
| H | -7.51600900 | 0.76646900  | -1.61099400 |
| C | -7.26240200 | 3.22139900  | 0.82979400  |
| H | -7.42901200 | 4.07056800  | 0.16158600  |
| H | -8.21229500 | 3.02291300  | 1.34668900  |
| H | -6.52347100 | 3.50895700  | 1.59236900  |
| C | -6.96437500 | 0.79040200  | 1.04607000  |
| H | -6.70858700 | -0.17428900 | 0.58370100  |
| H | -6.34402900 | 0.91450500  | 1.94592100  |
| H | -8.01173200 | 0.73011900  | 1.37236300  |
| C | -4.93914300 | -4.26888700 | -1.56100900 |
| H | -4.34374800 | -3.52905500 | -2.11011900 |
| H | -4.23807700 | -5.01926000 | -1.16957800 |
| H | -5.59784300 | -4.76714000 | -2.28617300 |
| C | -6.57406600 | -4.83978600 | 0.16574600  |
| H | -7.35549300 | -4.53761100 | 0.86977600  |
| H | -7.07096800 | -5.37252600 | -0.65768800 |
| H | -5.91763500 | -5.55301700 | 0.67996500  |
| C | -6.77947900 | -2.66487300 | -1.03606000 |
| H | -7.44829600 | -2.23622900 | -0.27505300 |
| H | -6.26626400 | -1.82990500 | -1.53461200 |
| H | -7.40941000 | -3.16535000 | -1.78566600 |
| C | -3.27780100 | -4.62077800 | 4.19376600  |
| H | -2.42931200 | -4.97602900 | 3.59039900  |
| H | -3.10848500 | -4.94739500 | 5.23034400  |
| H | -4.19183500 | -5.10597700 | 3.83305500  |
| C | -4.49984400 | -2.63605000 | 5.10608000  |
| H | -5.43787700 | -3.17360000 | 4.93721600  |
| H | -4.19061800 | -2.83390300 | 6.14236500  |
| H | -4.68626400 | -1.55590500 | 5.01651600  |
| C | -2.07798500 | -2.51790600 | 4.68345700  |
| H | -1.21505200 | -2.79268000 | 4.05904200  |
| H | -2.10498100 | -1.42277800 | 4.77556800  |
| H | -1.89935700 | -2.92461600 | 5.68796900  |
| C | 0.82896400  | 2.96554900  | 3.32753100  |
| C | 0.76554500  | 4.37671700  | 3.72516000  |
| H | 0.99278700  | 2.92258300  | 2.02271600  |
| C | 1.73222700  | 5.07979000  | 4.32618400  |
| H | -0.15812800 | 4.89614700  | 3.43765300  |
| H | 1.62358400  | 6.14199100  | 4.53536500  |
| H | 2.66295200  | 4.60875100  | 4.64815700  |
| C | -0.38964700 | 2.20829400  | 3.30515900  |
| H | -1.29876500 | 2.81427100  | 3.19362000  |
| C | -0.56204400 | 0.85109900  | 3.19385900  |

|   |             |            |             |
|---|-------------|------------|-------------|
| H | 0.22013600  | 0.13909000 | 3.47348400  |
| H | -1.58026200 | 0.46553100 | 3.20354500  |
| H | 1.72277900  | 2.41997500 | 3.66572300  |
| C | 1.05938600  | 3.76227500 | -0.01986300 |
| O | 0.97690100  | 2.60059300 | 0.74122300  |
| C | 2.39299200  | 4.48253300 | 0.40259600  |
| C | 3.01541000  | 5.39876400 | -0.61479300 |
| C | 3.35575600  | 6.66664300 | -0.39107200 |
| H | 3.27088400  | 4.94508500 | -1.57758900 |
| H | 3.14106500  | 7.14835400 | 0.56449400  |
| H | 3.86411600  | 7.26977800 | -1.14125100 |
| C | 3.42750400  | 3.44437300 | 0.75432800  |
| C | 4.15618200  | 3.47831200 | 1.86743300  |
| H | 3.58622800  | 2.64216000 | 0.02409800  |
| H | 4.90067800  | 2.71188300 | 2.08992400  |
| H | 4.00956700  | 4.26215100 | 2.61382100  |
| C | -0.16916900 | 4.65663600 | 0.21146600  |
| C | -1.37922400 | 4.06897700 | 0.59041300  |
| C | -0.14761400 | 6.04452300 | 0.04043000  |
| C | -2.51844500 | 4.83217500 | 0.82240300  |
| H | -1.42778700 | 2.98789700 | 0.71575600  |
| C | -1.28278900 | 6.81548700 | 0.27827000  |
| H | 0.76994100  | 6.53650200 | -0.27641800 |
| C | -2.47302500 | 6.21589500 | 0.67914100  |
| H | -3.44470700 | 4.33311800 | 1.11572200  |
| H | -1.23062300 | 7.89692200 | 0.15588500  |
| H | -3.35646500 | 6.82282100 | 0.87829000  |
| C | 1.09912800  | 3.35488300 | -1.49303900 |
| H | 0.23572300  | 2.70226400 | -1.69777900 |
| H | 1.05568500  | 4.21475200 | -2.17791400 |
| H | 2.01114400  | 2.77471400 | -1.70493100 |
| H | 2.18677700  | 5.06266600 | 1.31885800  |

**(R)-P<sub>b</sub>**

|   |             |             |             |
|---|-------------|-------------|-------------|
| H | -1.96531500 | -1.91912100 | 0.24703900  |
| C | -0.63842200 | -0.55068600 | 0.58365900  |
| O | -0.99508100 | -1.88013100 | 0.25464800  |
| C | -1.43716900 | 0.42352500  | -0.36646400 |
| C | -1.10670700 | 1.86931000  | -0.14182700 |
| C | -0.22480600 | 2.56116500  | -0.85765200 |
| H | -1.63740500 | 2.36344300  | 0.67881400  |
| H | 0.32869500  | 2.09863000  | -1.67652200 |
| H | -0.00738600 | 3.60685700  | -0.64906500 |
| C | -2.91492300 | 0.19322200  | -0.23830100 |

|   |             |             |             |
|---|-------------|-------------|-------------|
| C | -3.62332200 | -0.61199100 | -1.03010500 |
| H | -3.41847400 | 0.71348100  | 0.58298600  |
| H | -4.69219000 | -0.76490300 | -0.89287500 |
| H | -3.15638100 | -1.13183500 | -1.86831900 |
| C | 0.84018800  | -0.41882400 | 0.27253600  |
| C | 1.36001600  | -1.08684300 | -0.83958700 |
| C | 1.69373100  | 0.39615600  | 1.01595200  |
| C | 2.69382200  | -0.94054200 | -1.20023500 |
| H | 0.70448600  | -1.73872800 | -1.41343500 |
| C | 3.03103500  | 0.54226200  | 0.65856500  |
| H | 1.31876100  | 0.93556300  | 1.88398600  |
| C | 3.53626000  | -0.12333200 | -0.45195400 |
| H | 3.07935900  | -1.47333800 | -2.06852100 |
| H | 3.67916400  | 1.18305500  | 1.25484300  |
| H | 4.58239700  | -0.00878000 | -0.73177200 |
| C | -0.96825700 | -0.29294500 | 2.04911100  |
| H | -0.36075500 | -0.94583600 | 2.68721200  |
| H | -0.79544400 | 0.74900000  | 2.34810600  |
| H | -2.02479500 | -0.52387300 | 2.24070400  |
| H | -1.12274300 | 0.13457000  | -1.38254500 |

**(S)-TS4**

|   |             |             |             |
|---|-------------|-------------|-------------|
| P | -1.44181100 | -0.89379600 | 0.38870200  |
| C | -0.51473200 | -2.04755000 | 1.47376200  |
| C | -2.62149100 | -1.93407800 | -0.54556400 |
| C | -2.44045600 | 0.12808300  | 1.51637400  |
| C | 0.56006400  | -1.49927500 | 2.22781400  |
| C | -0.71421600 | -3.42649700 | 1.42223600  |
| C | -2.08659400 | -2.87568300 | -1.42212200 |
| C | -3.99365500 | -1.68942000 | -0.60030300 |
| C | -3.34093300 | -0.40167300 | 2.43095300  |
| C | -2.26931700 | 1.50909500  | 1.44582000  |
| C | 0.75608600  | -0.04971200 | 2.52127800  |
| C | 1.39396500  | -2.41765100 | 2.83333400  |
| C | 0.14232700  | -4.33543800 | 2.05988700  |
| H | -1.55356600 | -3.82028400 | 0.85179700  |
| C | -2.84740100 | -3.52525800 | -2.39571800 |
| H | -1.01966600 | -3.10029500 | -1.35964300 |
| C | -4.80214100 | -2.25169900 | -1.59163500 |
| H | -4.43503200 | -1.01576100 | 0.13163600  |
| C | -4.17224400 | 0.41348700  | 3.20705600  |
| H | -3.40943100 | -1.48683900 | 2.52165000  |
| C | -3.06378000 | 2.38359400  | 2.18216000  |
| H | -1.52507800 | 1.89835600  | 0.75232900  |



|   |             |             |             |
|---|-------------|-------------|-------------|
| C | 1.55690900  | 0.86499900  | 1.77907100  |
| C | 0.18447700  | 0.45044500  | 3.67249400  |
| C | 1.20720000  | -3.79407600 | 2.73648900  |
| H | -0.01698800 | -5.40998300 | 2.00908300  |
| C | -4.17421000 | -3.07417500 | -2.55436300 |
| C | -4.08371800 | 1.80531100  | 2.97353400  |
| P | 2.01114000  | 0.37170600  | 0.06683500  |
| C | 1.78302000  | 2.15302400  | 2.26238500  |
| C | 0.39872300  | 1.74770600  | 4.12869100  |
| C | 3.04572400  | 1.72662300  | -0.59145900 |
| C | 3.18306300  | -1.00561300 | 0.30959200  |
| C | 1.21962700  | 2.61994400  | 3.45936400  |
| H | 2.39916900  | 2.83800000  | 1.68263500  |
| C | 4.34248600  | 1.54381700  | -1.05145400 |
| C | 2.43227800  | 2.96474400  | -0.79228800 |
| C | 4.31349000  | -0.87187200 | 1.10449800  |
| C | 2.93900800  | -2.22319600 | -0.31936600 |
| H | 1.40132400  | 3.62761500  | 3.82537200  |
| C | 5.07154000  | 2.56386600  | -1.67490500 |
| H | 4.79487600  | 0.56160000  | -0.95026400 |
| C | 3.13345900  | 4.05640800  | -1.29921500 |
| H | 1.37826000  | 3.06090500  | -0.53687900 |
| C | 5.28593800  | -1.87290100 | 1.19756900  |
| H | 4.45021000  | 0.06384000  | 1.64736300  |
| C | 3.85345100  | -3.27296400 | -0.26356200 |
| H | 1.99962200  | -2.33543600 | -0.85773900 |
| C | 4.47489900  | 3.84201800  | -1.70441500 |
| C | 5.07488800  | -3.02426900 | 0.40879100  |
| C | 3.16486300  | -3.42380600 | 3.65737600  |
| H | 3.93228500  | -3.46240300 | 2.85706800  |
| H | 3.60690200  | -3.56012300 | 4.64939800  |
| O | 2.49739900  | -2.17416900 | 3.60073900  |
| O | 2.19572800  | -4.43327600 | 3.42517600  |
| H | -1.23972100 | 0.47877900  | 6.39741200  |
| C | -1.17319400 | 0.83042300  | 5.36309300  |
| H | -2.16412500 | 1.13141100  | 4.97072700  |
| O | -0.28618500 | 1.93541600  | 5.29238700  |
| O | -0.63977600 | -0.19851800 | 4.54434100  |
| O | -4.89546900 | -3.44357900 | -3.66376800 |
| O | -5.01620500 | 2.65473100  | 3.52358000  |
| O | 6.06927300  | -3.96787700 | 0.28534400  |
| O | 5.15748800  | 4.93356100  | -2.19373800 |
| C | -6.22211900 | 2.69391100  | 2.78615900  |
| H | -6.83884300 | 3.48477900  | 3.22668000  |

|    |             |             |             |
|----|-------------|-------------|-------------|
| H  | -6.03635000 | 2.92372200  | 1.72601300  |
| H  | -6.76899200 | 1.74011200  | 2.84438000  |
| C  | -2.78541500 | 3.89398700  | 2.14734600  |
| C  | -5.08275700 | -0.28603900 | 4.23527100  |
| C  | -6.31524400 | -1.98839700 | -1.60908900 |
| C  | -4.52088900 | -2.74615900 | -4.83868600 |
| H  | -5.08148500 | -3.19658900 | -5.66446500 |
| H  | -4.76235000 | -1.67490700 | -4.77102000 |
| H  | -3.44313000 | -2.83218700 | -5.04221400 |
| C  | -2.17003300 | -4.67645600 | -3.16255700 |
| C  | 6.47827200  | -1.60455200 | 2.13677100  |
| C  | 3.49777800  | -4.65218600 | -0.84050600 |
| C  | 7.04017800  | -3.62230900 | -0.68207400 |
| H  | 7.63322100  | -2.74736200 | -0.37535100 |
| H  | 7.70805500  | -4.48427200 | -0.78500100 |
| H  | 6.57627100  | -3.40172700 | -1.65494300 |
| C  | 6.44036300  | 2.19547400  | -2.28390800 |
| C  | 2.42235800  | 5.40949400  | -1.45834900 |
| C  | 6.14715400  | 5.49625000  | -1.35991800 |
| H  | 6.11588800  | 6.58574300  | -1.48222800 |
| H  | 5.96706100  | 5.25331200  | -0.30246000 |
| H  | 7.15318400  | 5.15421500  | -1.64225800 |
| Cu | -0.00019800 | 0.20423700  | -1.13428400 |
| C  | -1.44227000 | 2.48696900  | -2.60190300 |
| O  | -0.69824600 | 2.07824300  | -1.64654800 |
| C  | -1.70029400 | 0.83462700  | -4.04820800 |
| C  | -3.11531300 | 0.66956400  | -4.34560900 |
| C  | -3.83189500 | 1.29603200  | -5.28896800 |
| H  | -3.64591400 | -0.01580900 | -3.66747200 |
| H  | -3.36950900 | 1.99555300  | -5.98798500 |
| H  | -4.90618400 | 1.14389600  | -5.38586900 |
| C  | -1.04149900 | -0.26600400 | -3.43853500 |
| C  | 0.30658500  | -0.39785400 | -3.17467500 |
| H  | -1.69053500 | -1.07045400 | -3.07353500 |
| H  | 0.71163300  | -1.37851800 | -2.90540400 |
| H  | 1.02454000  | 0.31721900  | -3.58604700 |
| H  | -1.11742600 | 1.37211900  | -4.80084000 |
| C  | 1.01253600  | 5.36625600  | -0.86191800 |
| H  | 0.37474300  | 4.59371300  | -1.31136700 |
| H  | 1.04419800  | 5.18568700  | 0.22385500  |
| H  | 0.52326100  | 6.33716100  | -1.02235300 |
| C  | 3.15740000  | 6.54266600  | -0.72946200 |
| H  | 3.39500200  | 6.26263400  | 0.30771100  |
| H  | 4.08082400  | 6.83293500  | -1.23590200 |

|   |             |             |             |
|---|-------------|-------------|-------------|
| H | 2.51316600  | 7.43269200  | -0.69218400 |
| C | 2.30417800  | 5.75129100  | -2.94882000 |
| H | 1.78137300  | 6.71121200  | -3.07519500 |
| H | 3.28989400  | 5.83233800  | -3.42112900 |
| H | 1.72837700  | 4.98053400  | -3.47856400 |
| C | 6.76810200  | 3.00207000  | -3.54720400 |
| H | 6.90378200  | 4.07080400  | -3.37243700 |
| H | 7.69494100  | 2.61340900  | -3.99193200 |
| H | 5.96687500  | 2.89406800  | -4.29130200 |
| C | 6.44932800  | 0.72170800  | -2.73116800 |
| H | 6.42424100  | 0.01400900  | -1.89069100 |
| H | 5.60306400  | 0.49518500  | -3.39405800 |
| H | 7.37700600  | 0.51948100  | -3.28365400 |
| C | 7.55410400  | 2.34151600  | -1.23911700 |
| H | 7.35360500  | 1.69356500  | -0.37410800 |
| H | 8.52026900  | 2.03807800  | -1.66899300 |
| H | 7.66257000  | 3.36493200  | -0.86397000 |
| C | 5.95743500  | -1.09077400 | 3.49175900  |
| H | 5.33752700  | -0.19100600 | 3.41577600  |
| H | 5.36480800  | -1.85724900 | 4.00880900  |
| H | 6.81191700  | -0.84376000 | 4.13688200  |
| C | 7.34693500  | -2.82324600 | 2.47154600  |
| H | 7.96379900  | -3.16894500 | 1.63703200  |
| H | 8.03207300  | -2.54683800 | 3.28538600  |
| H | 6.74337800  | -3.67373400 | 2.81355200  |
| C | 7.35878500  | -0.50772800 | 1.52405400  |
| H | 7.76241800  | -0.80487900 | 0.54524600  |
| H | 6.78950700  | 0.42207900  | 1.37920500  |
| H | 8.20933700  | -0.28291100 | 2.18382000  |
| C | 3.61204000  | -5.70129200 | 0.27483600  |
| H | 2.94811300  | -5.45438500 | 1.11580300  |
| H | 3.31835400  | -6.68926400 | -0.10869700 |
| H | 4.63655700  | -5.77306200 | 0.65627700  |
| C | 2.05100400  | -4.68309500 | -1.34580500 |
| H | 1.33475700  | -4.42194600 | -0.55141300 |
| H | 1.88929500  | -4.00719500 | -2.19964000 |
| H | 1.81168300  | -5.70003600 | -1.68662700 |
| C | 4.39187600  | -5.05738100 | -2.01840200 |
| H | 4.41890500  | -4.27145200 | -2.78705600 |
| H | 5.41604600  | -5.27932100 | -1.70292500 |
| H | 3.99093600  | -5.96721900 | -2.48747200 |
| C | -1.54606100 | -5.62392300 | -2.12032100 |
| H | -0.78707200 | -5.13661500 | -1.49534600 |
| H | -2.31907000 | -6.03454500 | -1.45507300 |

|   |             |             |             |
|---|-------------|-------------|-------------|
| H | -1.05456200 | -6.46521700 | -2.62996300 |
| C | -3.11316700 | -5.55030600 | -3.99777400 |
| H | -3.97260900 | -5.89711400 | -3.41079600 |
| H | -3.49661700 | -5.05034500 | -4.89208000 |
| H | -2.55535500 | -6.43554000 | -4.33517500 |
| C | -1.05348000 | -4.14322400 | -4.06799900 |
| H | -0.29183800 | -3.59129100 | -3.49997500 |
| H | -0.55056900 | -4.97817100 | -4.57771400 |
| H | -1.43946900 | -3.46256100 | -4.83907700 |
| C | -7.08987800 | -3.30734700 | -1.74820000 |
| H | -8.17017300 | -3.10332100 | -1.72831700 |
| H | -6.85533300 | -3.82862100 | -2.68078700 |
| H | -6.86147600 | -3.97910200 | -0.90822600 |
| C | -6.69336900 | -1.03412800 | -2.74886800 |
| H | -6.55888800 | -1.50494800 | -3.72880500 |
| H | -7.75239200 | -0.74943800 | -2.66219700 |
| H | -6.09155500 | -0.11197300 | -2.71724000 |
| C | -6.78725200 | -1.35920800 | -0.29434500 |
| H | -6.51780300 | -1.98028700 | 0.57198800  |
| H | -6.38420500 | -0.35069100 | -0.12961100 |
| H | -7.88183300 | -1.26919100 | -0.31300000 |
| C | -4.25120600 | -1.32066800 | 5.01577200  |
| H | -3.81601500 | -2.10165700 | 4.38237900  |
| H | -3.42674800 | -0.83821400 | 5.55888700  |
| H | -4.89110100 | -1.82106800 | 5.75556600  |
| C | -5.69372300 | 0.63274300  | 5.29989600  |
| H | -6.45916400 | 1.31086700  | 4.91283900  |
| H | -6.17066500 | 0.00683800  | 6.06756700  |
| H | -4.92732200 | 1.24463900  | 5.79369900  |
| C | -6.20562500 | -1.03194400 | 3.50451100  |
| H | -6.85136400 | -0.34647100 | 2.93789700  |
| H | -5.80140500 | -1.76572000 | 2.79187500  |
| H | -6.83880200 | -1.57240100 | 4.22320500  |
| C | -2.53142500 | 4.38125200  | 3.58064800  |
| H | -1.68182800 | 3.84735000  | 4.03178000  |
| H | -2.28977800 | 5.45432200  | 3.57427200  |
| H | -3.40962200 | 4.23177800  | 4.21907800  |
| C | -3.93095000 | 4.70008000  | 1.52284700  |
| H | -4.82588500 | 4.70697400  | 2.15322900  |
| H | -3.61294700 | 5.74527500  | 1.39847900  |
| H | -4.19311400 | 4.31157300  | 0.52737500  |
| C | -1.52984600 | 4.20585600  | 1.32413000  |
| H | -0.63691600 | 3.69935900  | 1.72235700  |
| H | -1.63571400 | 3.92802800  | 0.26424600  |

|   |             |            |             |
|---|-------------|------------|-------------|
| H | -1.34152500 | 5.28788200 | 1.36653500  |
| C | -2.89140000 | 2.71078300 | -2.30959800 |
| C | -3.55258900 | 1.84009000 | -1.44034500 |
| C | -3.61491500 | 3.77623100 | -2.85006900 |
| C | -4.88527000 | 2.02693600 | -1.11185600 |
| H | -3.00224600 | 0.98899200 | -1.04497300 |
| C | -4.95763600 | 3.96598800 | -2.52727600 |
| H | -3.13077100 | 4.47273400 | -3.53248400 |
| C | -5.60060800 | 3.09437100 | -1.65615700 |
| H | -5.36749300 | 1.33805500 | -0.41568400 |
| H | -5.50232900 | 4.80210500 | -2.96397700 |
| H | -6.65011500 | 3.24139400 | -1.40311500 |
| C | -0.79483300 | 3.43907100 | -3.58625700 |
| H | -0.71548100 | 4.44211500 | -3.13502600 |
| H | 0.22300500  | 3.08332100 | -3.79517500 |
| H | -1.34400400 | 3.53689400 | -4.53111200 |

**(S)-D**

|   |             |             |             |
|---|-------------|-------------|-------------|
| P | -1.51073800 | -0.65228600 | 0.25558400  |
| C | -0.68854900 | -2.04167200 | 1.13721900  |
| C | -2.85242600 | -1.41005600 | -0.73238900 |
| C | -2.40747200 | 0.21443600  | 1.58485500  |
| C | 0.40625500  | -1.70405800 | 1.98305900  |
| C | -1.01316100 | -3.37656800 | 0.89946800  |
| C | -2.54174400 | -2.35126400 | -1.70935200 |
| C | -4.16762200 | -0.95201400 | -0.65197800 |
| C | -3.29497100 | -0.44173600 | 2.42657200  |
| C | -2.22359000 | 1.58654500  | 1.72554100  |
| C | 0.71580600  | -0.32197100 | 2.45205000  |
| C | 1.12751100  | -2.76999300 | 2.48241900  |
| C | -0.27217700 | -4.43939500 | 1.43567000  |
| H | -1.87406600 | -3.61228000 | 0.27684400  |
| C | -3.48101300 | -2.83236900 | -2.62654400 |
| H | -1.52180600 | -2.73284100 | -1.76643700 |
| C | -5.14750200 | -1.35316500 | -1.55796700 |
| H | -4.42034400 | -0.23655600 | 0.12416800  |
| C | -4.11107200 | 0.24934600  | 3.32858800  |
| H | -3.37124000 | -1.52784400 | 2.35361900  |
| C | -3.02117300 | 2.34825300  | 2.57669900  |
| H | -1.44101100 | 2.05716800  | 1.13196400  |
| C | 1.54062400  | 0.63120900  | 1.79000500  |
| C | 0.19589600  | 0.07856700  | 3.66655600  |
| C | 0.80987900  | -4.09731200 | 2.20770000  |
| H | -0.53227900 | -5.47772400 | 1.24294500  |

|   |             |             |             |
|---|-------------|-------------|-------------|
| C | -4.75379600 | -2.23042600 | -2.59430900 |
| C | -4.03736700 | 1.65988400  | 3.28402900  |
| P | 2.01406400  | 0.28045000  | 0.04840300  |
| C | 1.80317600  | 1.86782900  | 2.37916600  |
| C | 0.45253400  | 1.32215600  | 4.23405500  |
| C | 3.15934600  | 1.62254300  | -0.41591000 |
| C | 3.07536100  | -1.19628400 | 0.19923400  |
| C | 1.26938100  | 2.23945300  | 3.62188600  |
| H | 2.42939000  | 2.58632100  | 1.85294200  |
| C | 4.50692600  | 1.44729200  | -0.69613600 |
| C | 2.58842900  | 2.88076900  | -0.60753000 |
| C | 4.15496000  | -1.23337700 | 1.07186700  |
| C | 2.78978200  | -2.32040500 | -0.57087900 |
| H | 1.47825100  | 3.20753800  | 4.07132100  |
| C | 5.32458400  | 2.49703500  | -1.13111000 |
| H | 4.92916100  | 0.45101800  | -0.60594500 |
| C | 3.36114800  | 3.99384500  | -0.92583400 |
| H | 1.50882600  | 2.97299100  | -0.51245800 |
| C | 5.04632000  | -2.31067900 | 1.11214800  |
| H | 4.31423900  | -0.37838600 | 1.72914300  |
| C | 3.61684800  | -3.44085400 | -0.57056900 |
| H | 1.88394300  | -2.30339900 | -1.17352400 |
| C | 4.74427800  | 3.78514100  | -1.15474600 |
| C | 4.80577200  | -3.35612900 | 0.19439900  |
| C | 2.75249600  | -4.05141500 | 3.23313600  |
| H | 3.55539100  | -4.08406200 | 2.46798300  |
| H | 3.12261800  | -4.34885700 | 4.21938600  |
| O | 2.22136900  | -2.73691800 | 3.29969100  |
| O | 1.69885400  | -4.91529000 | 2.84063400  |
| H | -1.11326800 | -0.13262000 | 6.43737600  |
| C | -1.09108400 | 0.31789700  | 5.43982200  |
| H | -2.09522100 | 0.66775000  | 5.13191000  |
| O | -0.19140000 | 1.41396500  | 5.43273000  |
| O | -0.61690600 | -0.63310700 | 4.49961000  |
| O | -5.66296400 | -2.48212800 | -3.59641700 |
| O | -4.97316500 | 2.41397700  | 3.95385500  |
| O | 5.73538400  | -4.35803100 | 0.02911100  |
| O | 5.49156800  | 4.89547200  | -1.48001700 |
| C | -6.18895100 | 2.52622900  | 3.24029300  |
| H | -6.85014400 | 3.16390700  | 3.83685900  |
| H | -6.03393500 | 2.98569200  | 2.25176300  |
| H | -6.67024100 | 1.54736800  | 3.08836800  |
| C | -2.72808700 | 3.84263000  | 2.78190400  |
| C | -4.99136700 | -0.59830000 | 4.27072500  |

|    |             |             |             |
|----|-------------|-------------|-------------|
| C  | -6.61658200 | -0.95384800 | -1.33541800 |
| C  | -5.42332400 | -1.69001400 | -4.74455600 |
| H  | -6.26584900 | -1.84988200 | -5.42629800 |
| H  | -5.35508600 | -0.62086100 | -4.48907000 |
| H  | -4.49203700 | -1.98222200 | -5.25398500 |
| C  | -3.03273100 | -3.99033300 | -3.53982500 |
| C  | 6.18705000  | -2.24540000 | 2.14761400  |
| C  | 3.19726000  | -4.72467900 | -1.30193300 |
| C  | 6.78773500  | -3.99212600 | -0.84085200 |
| H  | 7.46201600  | -3.25287700 | -0.38238900 |
| H  | 7.35633300  | -4.90294300 | -1.05786700 |
| H  | 6.40138800  | -3.57081300 | -1.78097200 |
| C  | 6.76269100  | 2.15069200  | -1.56879800 |
| C  | 2.67953600  | 5.36238300  | -1.07630400 |
| C  | 6.38262100  | 5.39157000  | -0.50612500 |
| H  | 6.31414800  | 6.48648900  | -0.50070700 |
| H  | 6.13206500  | 5.01819400  | 0.49757000  |
| H  | 7.42158400  | 5.11889800  | -0.74308300 |
| Cu | 0.01482000  | 0.49838500  | -1.14951700 |
| C  | -0.90164300 | 2.43240700  | -3.08342400 |
| O  | -0.20545100 | 2.30858300  | -1.91338700 |
| C  | -0.44658000 | 1.25364500  | -4.04605100 |
| C  | -1.07257100 | 1.17061000  | -5.40721200 |
| C  | -0.50358700 | 1.60548400  | -6.53062000 |
| H  | -2.06055000 | 0.70013100  | -5.45648500 |
| H  | 0.48253900  | 2.07270800  | -6.51979600 |
| H  | -0.99459200 | 1.52119500  | -7.49848000 |
| C  | -0.62124100 | -0.06655200 | -3.36619100 |
| C  | 0.39400200  | -0.88879600 | -3.03312800 |
| H  | -1.65542600 | -0.38750700 | -3.18458300 |
| H  | 0.21694400  | -1.87848700 | -2.60706700 |
| H  | 1.43053100  | -0.63126600 | -3.26083000 |
| H  | 0.63447100  | 1.43947300  | -4.16839200 |
| C  | 1.19949500  | 5.28781600  | -0.68059300 |
| H  | 0.63083300  | 4.55813500  | -1.27334800 |
| H  | 1.08053900  | 5.02263400  | 0.38297400  |
| H  | 0.74091400  | 6.27590400  | -0.82711500 |
| C  | 3.31633200  | 6.42927600  | -0.17503400 |
| H  | 3.44323800  | 6.05959100  | 0.85358100  |
| H  | 4.28555000  | 6.76976900  | -0.54774500 |
| H  | 2.65933900  | 7.30954800  | -0.13132900 |
| C  | 2.75472000  | 5.81372100  | -2.53938000 |
| H  | 2.26758300  | 6.79309000  | -2.65761800 |
| H  | 3.79199400  | 5.90222200  | -2.88232000 |

|   |             |             |             |
|---|-------------|-------------|-------------|
| H | 2.23205900  | 5.09873200  | -3.18917000 |
| C | 7.23249200  | 3.00229000  | -2.75562700 |
| H | 7.31833800  | 4.06695800  | -2.53005800 |
| H | 8.21577400  | 2.64578500  | -3.09393100 |
| H | 6.53212900  | 2.90533400  | -3.59693800 |
| C | 6.84412500  | 0.69204900  | -2.05692400 |
| H | 6.70737600  | -0.04543200 | -1.25241300 |
| H | 6.09996200  | 0.48677400  | -2.83870900 |
| H | 7.84089700  | 0.51298600  | -2.48296300 |
| C | 7.74114800  | 2.26978900  | -0.39323300 |
| H | 7.43584600  | 1.60880600  | 0.42984800  |
| H | 8.75055700  | 1.96755800  | -0.70950400 |
| H | 7.80950200  | 3.28492800  | 0.01060500  |
| C | 5.62258700  | -1.77278600 | 3.50036800  |
| H | 5.17377600  | -0.77429700 | 3.46420700  |
| H | 4.85702900  | -2.46008500 | 3.88204200  |
| H | 6.43591700  | -1.73263100 | 4.23775400  |
| C | 6.88370200  | -3.58029700 | 2.43645800  |
| H | 7.51453100  | -3.93417800 | 1.61678600  |
| H | 7.53400400  | -3.45205900 | 3.31317600  |
| H | 6.16093000  | -4.37425800 | 2.66677600  |
| C | 7.22837200  | -1.21433600 | 1.69431800  |
| H | 7.69141100  | -1.48648500 | 0.73551700  |
| H | 6.77077800  | -0.22180700 | 1.57122000  |
| H | 8.03067000  | -1.12453700 | 2.44119800  |
| C | 3.16739900  | -5.88333700 | -0.29475400 |
| H | 2.46334000  | -5.67555300 | 0.52343500  |
| H | 2.83917900  | -6.80611400 | -0.79519100 |
| H | 4.15608900  | -6.06493700 | 0.14104300  |
| C | 1.78584300  | -4.59511600 | -1.88855900 |
| H | 1.03808500  | -4.33185700 | -1.12352200 |
| H | 1.74050100  | -3.84996500 | -2.69707700 |
| H | 1.48921500  | -5.56042800 | -2.32107400 |
| C | 4.12889100  | -5.08343600 | -2.46595800 |
| H | 4.25221700  | -4.23478200 | -3.15425500 |
| H | 5.11585300  | -5.40608900 | -2.12115000 |
| H | 3.69523000  | -5.91546000 | -3.03896100 |
| C | -2.38047700 | -5.07279000 | -2.65795400 |
| H | -1.47433700 | -4.72649200 | -2.14283500 |
| H | -3.08648500 | -5.43360300 | -1.89620100 |
| H | -2.08696700 | -5.93045800 | -3.27952500 |
| C | -4.16116300 | -4.70220700 | -4.29460900 |
| H | -4.96283600 | -5.02375100 | -3.61856400 |
| H | -4.61151700 | -4.09413900 | -5.08419500 |



|   |             |             |             |
|---|-------------|-------------|-------------|
| H | -3.74336300 | -5.59845700 | -4.77520700 |
| C | -1.99160600 | -3.49817500 | -4.55158600 |
| H | -1.09894900 | -3.09212800 | -4.05635300 |
| H | -1.66849500 | -4.32917400 | -5.19538600 |
| H | -2.39104500 | -2.70565400 | -5.20040400 |
| C | -7.39871900 | -2.23241700 | -1.00077000 |
| H | -8.45578300 | -1.99156400 | -0.81372600 |
| H | -7.35462700 | -2.95582100 | -1.82322600 |
| H | -6.99484500 | -2.70919300 | -0.09561700 |
| C | -7.26880100 | -0.26701100 | -2.54221100 |
| H | -7.43556700 | -0.96435600 | -3.36789600 |
| H | -8.24806200 | 0.13614500  | -2.24555800 |
| H | -6.65564600 | 0.57155800  | -2.89911900 |
| C | -6.76902900 | 0.00128300  | -0.14573900 |
| H | -6.38951100 | -0.43266100 | 0.78954000  |
| H | -6.25342700 | 0.95768700  | -0.31470800 |
| H | -7.83614000 | 0.21686100  | 0.00392900  |
| C | -4.12165900 | -1.69274600 | 4.91702300  |
| H | -3.60415000 | -2.33202400 | 4.19345100  |
| H | -3.35982800 | -1.25535000 | 5.57666000  |
| H | -4.75641100 | -2.34346700 | 5.53463300  |
| C | -5.62110600 | 0.16273800  | 5.44292100  |
| H | -6.42529200 | 0.84150700  | 5.14539700  |
| H | -6.05625900 | -0.56940700 | 6.13828300  |
| H | -4.87499300 | 0.74841100  | 5.99542600  |
| C | -6.10292500 | -1.28891500 | 3.47062500  |
| H | -6.79408100 | -0.56177900 | 3.02176700  |
| H | -5.69457700 | -1.90652200 | 2.65694700  |
| H | -6.69269600 | -1.94466100 | 4.12744000  |
| C | -2.38066500 | 4.06754800  | 4.26137800  |
| H | -1.50872700 | 3.46752500  | 4.56429600  |
| H | -2.13698100 | 5.12648000  | 4.43263300  |
| H | -3.22211900 | 3.80458800  | 4.91383300  |
| C | -3.90407200 | 4.74652700  | 2.39277600  |
| H | -4.75259500 | 4.63629600  | 3.07437200  |
| H | -3.58431400 | 5.79762600  | 2.43256500  |
| H | -4.23830900 | 4.54574200  | 1.36406600  |
| C | -1.52898400 | 4.29412600  | 1.94077200  |
| H | -0.61851900 | 3.72108300  | 2.16798600  |
| H | -1.71923500 | 4.21570600  | 0.85943700  |
| H | -1.31658900 | 5.34973100  | 2.15923900  |
| C | -2.42470400 | 2.45206400  | -2.85407900 |
| C | -2.88533200 | 2.44071100  | -1.53873100 |
| C | -3.37359200 | 2.59836000  | -3.87278000 |

|   |             |            |             |
|---|-------------|------------|-------------|
| C | -4.23643000 | 2.56330400 | -1.23469200 |
| H | -2.13250900 | 2.34890400 | -0.76148700 |
| C | -4.73017100 | 2.71452800 | -3.57874900 |
| H | -3.05266300 | 2.65089700 | -4.91263700 |
| C | -5.16934700 | 2.70655900 | -2.25664400 |
| H | -4.55343300 | 2.54593300 | -0.18803200 |
| H | -5.44991500 | 2.83651600 | -4.38887900 |
| H | -6.23019900 | 2.81640800 | -2.02836400 |
| C | -0.51945900 | 3.75524700 | -3.76026200 |
| H | -0.79710000 | 4.59077400 | -3.10348800 |
| H | 0.57186400  | 3.77322800 | -3.89895500 |
| H | -1.00081100 | 3.90388700 | -4.73596800 |

**(S)-TS5**

|   |             |             |             |
|---|-------------|-------------|-------------|
| P | -1.92688600 | -0.05290800 | -0.24367800 |
| C | -1.23079100 | -0.44716100 | -1.90398400 |
| C | -3.40947100 | 1.02012300  | -0.45212100 |
| C | -2.73841900 | -1.65437100 | 0.15110600  |
| C | -0.23601500 | -1.46880900 | -1.97097300 |
| C | -1.55726100 | 0.28426300  | -3.04390900 |
| C | -3.38913700 | 2.22601600  | -1.14599000 |
| C | -4.59177800 | 0.65635900  | 0.19886200  |
| C | -3.65551400 | -2.18192200 | -0.74892100 |
| C | -2.49829800 | -2.33473400 | 1.33983500  |
| C | 0.17288500  | -2.40830700 | -0.88624200 |
| C | 0.35542500  | -1.64757600 | -3.20597900 |
| C | -0.91719500 | 0.09493800  | -4.27869300 |
| H | -2.35090400 | 1.02531900  | -2.98854900 |
| C | -4.52519800 | 3.04014800  | -1.27249300 |
| H | -2.46388400 | 2.56052300  | -1.61275400 |
| C | -5.72658100 | 1.46024500  | 0.19682400  |
| H | -4.62096200 | -0.28775100 | 0.73042200  |
| C | -4.42408200 | -3.31419800 | -0.46725300 |
| H | -3.79469700 | -1.66750500 | -1.69929100 |
| C | -3.23350700 | -3.46480700 | 1.70122100  |
| H | -1.70751100 | -1.97002400 | 1.98734600  |
| C | 1.14223500  | -2.12636400 | 0.11693500  |
| C | -0.29819900 | -3.70485000 | -0.91824100 |
| C | 0.05536900  | -0.87375300 | -4.32114500 |
| H | -1.18300000 | 0.68128500  | -5.15530700 |
| C | -5.64928400 | 2.68685300  | -0.50222600 |
| C | -4.26415200 | -3.87365100 | 0.82014800  |
| P | 1.73522900  | -0.38370300 | 0.18149700  |
| C | 1.56324600  | -3.12527200 | 0.99410700  |

|   |             |             |             |
|---|-------------|-------------|-------------|
| C | 0.12126100  | -4.68862500 | -0.02972300 |
| C | 3.07582300  | -0.33278200 | 1.43559400  |
| C | 2.77672000  | -0.36965500 | -1.34413500 |
| C | 1.06075800  | -4.43474100 | 0.93896900  |
| H | 2.32283200  | -2.89630500 | 1.73963000  |
| C | 4.26994400  | 0.30116000  | 1.11907800  |
| C | 2.88787900  | -0.74628500 | 2.75579100  |
| C | 3.68404800  | -1.40793100 | -1.51017000 |
| C | 2.73691400  | 0.64747400  | -2.29743500 |
| H | 1.39786200  | -5.20939800 | 1.62367300  |
| C | 5.31173800  | 0.46590600  | 2.03638800  |
| H | 4.40352900  | 0.68198900  | 0.10919000  |
| C | 3.90298000  | -0.68224400 | 3.70865600  |
| H | 1.92169000  | -1.14706200 | 3.04595600  |
| C | 4.62936800  | -1.43184100 | -2.53530300 |
| H | 3.66641900  | -2.22816300 | -0.79424200 |
| C | 3.66848000  | 0.70137400  | -3.34080300 |
| H | 1.97310200  | 1.41929200  | -2.21113300 |
| C | 5.14470600  | -0.13905200 | 3.29656800  |
| C | 4.67825700  | -0.29004500 | -3.35859300 |
| C | 1.76304300  | -2.18932700 | -4.82566700 |
| H | 2.74234900  | -1.68410000 | -4.72092000 |
| H | 1.83817000  | -3.07204900 | -5.47004900 |
| O | 1.29146500  | -2.57835600 | -3.54590300 |
| O | 0.81577300  | -1.28268400 | -5.37522100 |
| H | -1.67430700 | -6.24310800 | -1.98253800 |
| C | -1.56229200 | -5.48567900 | -1.20034700 |
| H | -2.49732900 | -5.35562600 | -0.62196900 |
| O | -0.51593900 | -5.86007300 | -0.31915500 |
| O | -1.20227000 | -4.24439700 | -1.78608400 |
| O | -6.73001200 | 3.53587800  | -0.41899500 |
| O | -5.10087900 | -4.87861900 | 1.25018100  |
| O | 5.72699900  | -0.11259900 | -4.23330300 |
| O | 6.19435200  | -0.20637800 | 4.18583300  |
| C | -6.34976000 | -4.41767600 | 1.72363000  |
| H | -6.84097200 | -5.26913900 | 2.20725900  |
| H | -6.22637000 | -3.60640200 | 2.45617500  |
| H | -6.99256600 | -4.05386700 | 0.90821000  |
| C | -2.87238200 | -4.25225800 | 2.97099300  |
| C | -5.35510900 | -3.82357300 | -1.58609400 |
| C | -7.02575400 | 0.95315800  | 0.84290100  |
| C | -6.51593700 | 4.63213500  | 0.44572300  |
| H | -5.65289400 | 5.23874400  | 0.13547700  |
| H | -7.42261000 | 5.24617300  | 0.41212400  |

|    |             |             |             |
|----|-------------|-------------|-------------|
| H  | -6.34280600 | 4.29833200  | 1.48096600  |
| C  | -4.44804100 | 4.19483700  | -2.29395800 |
| C  | 5.48114200  | -2.70669000 | -2.67284400 |
| C  | 3.56058900  | 1.74600100  | -4.46383800 |
| C  | 6.89350800  | 0.36795400  | -3.59772800 |
| H  | 7.35202400  | -0.39362600 | -2.94755700 |
| H  | 7.60304900  | 0.63317800  | -4.38903100 |
| H  | 6.67830900  | 1.25922700  | -2.98704200 |
| C  | 6.52012400  | 1.29228300  | 1.55354400  |
| C  | 3.63713200  | -1.14614200 | 5.15085500  |
| C  | 7.12539400  | -1.22493200 | 3.88891800  |
| H  | 7.79544300  | -1.30615200 | 4.75197700  |
| H  | 6.62720200  | -2.19192000 | 3.72410100  |
| H  | 7.72542900  | -0.98950300 | 2.99724200  |
| Cu | -0.23921800 | 0.84486600  | 1.07166700  |
| C  | 2.18206200  | -1.58838300 | 5.34285400  |
| H  | 1.46620200  | -0.78432900 | 5.12188300  |
| H  | 1.92474300  | -2.46662500 | 4.73012100  |
| H  | 2.03502400  | -1.87152700 | 6.39369100  |
| C  | 4.51514400  | -2.34337900 | 5.53916700  |
| H  | 4.45124000  | -3.14436600 | 4.78749000  |
| H  | 5.56473000  | -2.06452800 | 5.66997100  |
| H  | 4.16683400  | -2.75773500 | 6.49607800  |
| C  | 3.88717800  | 0.00958100  | 6.12995700  |
| H  | 3.74966700  | -0.34596600 | 7.16190600  |
| H  | 4.90364400  | 0.40657500  | 6.03894800  |
| H  | 3.17184000  | 0.82834400  | 5.96790400  |
| C  | 7.42954800  | 1.81494300  | 2.67091700  |
| H  | 8.00531700  | 1.03508300  | 3.17561400  |
| H  | 8.15199500  | 2.52014000  | 2.23611800  |
| H  | 6.85299100  | 2.35209300  | 3.43465600  |
| C  | 6.00502100  | 2.54525600  | 0.81916000  |
| H  | 5.45850500  | 2.30681900  | -0.10425000 |
| H  | 5.33714900  | 3.14049200  | 1.45794100  |
| H  | 6.85578900  | 3.17923600  | 0.53201800  |
| C  | 7.34037400  | 0.47131600  | 0.54980300  |
| H  | 6.71902100  | 0.16411400  | -0.30535000 |
| H  | 8.17896500  | 1.06929200  | 0.16226800  |
| H  | 7.75673700  | -0.44181700 | 0.99766200  |
| C  | 4.54675300  | -3.92668700 | -2.55391700 |
| H  | 4.07559900  | -4.02400100 | -1.56804100 |
| H  | 3.73786900  | -3.87858500 | -3.29638700 |
| H  | 5.11982900  | -4.84762300 | -2.72981800 |
| C  | 6.18798900  | -2.85751000 | -4.02442400 |

|   |             |             |             |
|---|-------------|-------------|-------------|
| H | 7.00178900  | -2.14378600 | -4.17911900 |
| H | 6.62044700  | -3.86619200 | -4.08548300 |
| H | 5.48244100  | -2.74284200 | -4.85903300 |
| C | 6.51650400  | -2.77732700 | -1.54306200 |
| H | 7.26845700  | -1.97939400 | -1.62509400 |
| H | 6.04247500  | -2.68108100 | -0.55527100 |
| H | 7.04903900  | -3.73927500 | -1.57388600 |
| C | 3.51678900  | 1.03709600  | -5.82583900 |
| H | 2.62116300  | 0.40285900  | -5.90086600 |
| H | 3.45571000  | 1.78721800  | -6.62803300 |
| H | 4.40617400  | 0.42226000  | -6.00321000 |
| C | 2.26842600  | 2.55361400  | -4.34350700 |
| H | 1.37709300  | 1.90656900  | -4.33173000 |
| H | 2.25318500  | 3.18060500  | -3.44226700 |
| H | 2.18255700  | 3.21990800  | -5.21327400 |
| C | 4.71974100  | 2.74925300  | -4.43638800 |
| H | 4.83489900  | 3.18608300  | -3.43374000 |
| H | 5.66869500  | 2.29762600  | -4.74081600 |
| H | 4.50984800  | 3.57257300  | -5.13450600 |
| C | -3.88623800 | 3.62262600  | -3.61045000 |
| H | -2.86073800 | 3.24803500  | -3.51401400 |
| H | -4.51678000 | 2.80179100  | -3.98159500 |
| H | -3.86704400 | 4.40908200  | -4.37750200 |
| C | -5.79314200 | 4.82261400  | -2.68307300 |
| H | -6.52948600 | 4.06406400  | -2.97633800 |
| H | -6.23768100 | 5.44050700  | -1.89809400 |
| H | -5.62562500 | 5.48096600  | -3.54724100 |
| C | -3.50449000 | 5.29488200  | -1.79649000 |
| H | -2.50289000 | 4.90308300  | -1.57098000 |
| H | -3.39869100 | 6.07428400  | -2.56604400 |
| H | -3.87673200 | 5.77178400  | -0.87970000 |
| C | -8.11377200 | 0.84713900  | -0.23496400 |
| H | -9.05059300 | 0.48211300  | 0.21150300  |
| H | -8.31265800 | 1.81609100  | -0.70489400 |
| H | -7.81512700 | 0.13539100  | -1.01840200 |
| C | -7.51374500 | 1.86203500  | 1.97766000  |
| H | -7.89693700 | 2.81607500  | 1.60404500  |
| H | -8.33437400 | 1.36933300  | 2.51892800  |
| H | -6.70966600 | 2.06112000  | 2.70170700  |
| C | -6.84599700 | -0.44689100 | 1.44018200  |
| H | -6.50960800 | -1.17784500 | 0.68979900  |
| H | -6.12732300 | -0.45853600 | 2.27336000  |
| H | -7.81166600 | -0.79559900 | 1.83208400  |
| C | -4.60640300 | -3.77081100 | -2.93185600 |

|   |             |             |             |
|---|-------------|-------------|-------------|
| H | -4.34251300 | -2.75390400 | -3.24446400 |
| H | -3.67706900 | -4.35442800 | -2.90123400 |
| H | -5.24688700 | -4.18988600 | -3.71979500 |
| C | -5.81449400 | -5.27807400 | -1.42883700 |
| H | -6.52333100 | -5.43527300 | -0.61199800 |
| H | -6.31518700 | -5.59009500 | -2.35613200 |
| H | -4.96379200 | -5.95353000 | -1.26490700 |
| C | -6.57890800 | -2.90474300 | -1.70217300 |
| H | -7.20127900 | -2.91970300 | -0.79655600 |
| H | -6.27675400 | -1.86106200 | -1.87664200 |
| H | -7.21142600 | -3.21743700 | -2.54590800 |
| C | -2.54758500 | -5.70488300 | 2.59609500  |
| H | -1.69726600 | -5.75177300 | 1.90111500  |
| H | -2.27340300 | -6.27000700 | 3.49902900  |
| H | -3.40266100 | -6.20495400 | 2.12862100  |
| C | -3.99685200 | -4.23272100 | 4.01469000  |
| H | -4.85586800 | -4.83867400 | 3.71119000  |
| H | -3.62522900 | -4.64653800 | 4.96294300  |
| H | -4.33772800 | -3.20577200 | 4.21237100  |
| C | -1.62903400 | -3.67060200 | 3.65298000  |
| H | -0.75923700 | -3.64595800 | 2.98000600  |
| H | -1.79731800 | -2.65490900 | 4.03967300  |
| H | -1.36339500 | -4.30394500 | 4.51026100  |
| C | 0.80530100  | 1.91714900  | 3.99752900  |
| C | 0.89662000  | 2.99283900  | 4.98962000  |
| H | 0.83663600  | 2.41591100  | 2.76780900  |
| C | 2.02135700  | 3.47581300  | 5.53022200  |
| H | -0.05722300 | 3.46113200  | 5.26346000  |
| H | 2.01273500  | 4.30764500  | 6.23105400  |
| H | 2.99699400  | 3.05785400  | 5.27307500  |
| C | -0.45950400 | 1.26187900  | 3.81789100  |
| H | -1.32899500 | 1.88463200  | 4.06844000  |
| C | -0.73668100 | 0.07498400  | 3.19345700  |
| H | 0.01757900  | -0.70919400 | 3.08133800  |
| H | -1.77471000 | -0.24901900 | 3.11714200  |
| H | 1.69163400  | 1.26687500  | 3.93899600  |
| C | 0.71330100  | 3.93056500  | 1.14590200  |
| O | 0.76706500  | 2.57773600  | 1.46795500  |
| C | 1.16935000  | 4.10345900  | -0.33633900 |
| C | 0.32063600  | 3.32583000  | -1.29843300 |
| C | -0.18864800 | 3.83234200  | -2.41988800 |
| H | 0.17433200  | 2.26386600  | -1.06603500 |
| H | -0.05282400 | 4.88172600  | -2.68999900 |
| H | -0.73346800 | 3.21278600  | -3.13399300 |

|   |             |            |             |
|---|-------------|------------|-------------|
| C | 2.60745000  | 3.69066100 | -0.49870200 |
| C | 3.53095000  | 4.44413200 | -1.09248400 |
| H | 2.87336400  | 2.71055000 | -0.08609600 |
| H | 4.56825500  | 4.12214400 | -1.18580200 |
| H | 3.28768600  | 5.42584800 | -1.50363900 |
| H | 1.09052900  | 5.17246100 | -0.60249400 |
| C | 1.70169100  | 4.68836700 | 2.04644400  |
| H | 1.32621400  | 4.75565200 | 3.07473100  |
| H | 2.65451700  | 4.14217900 | 2.07335800  |
| H | 1.90491900  | 5.70406500 | 1.68017800  |
| C | -0.68723000 | 4.52916300 | 1.32631800  |
| C | -0.89165800 | 5.91379100 | 1.26117800  |
| C | -1.79552900 | 3.72456800 | 1.59087100  |
| C | -2.14461600 | 6.47040200 | 1.48881100  |
| H | -0.05259500 | 6.57730600 | 1.05011000  |
| C | -3.05838100 | 4.27354100 | 1.80093600  |
| H | -1.67413300 | 2.64231300 | 1.64227100  |
| C | -3.23609700 | 5.65144900 | 1.76871700  |
| H | -2.26815300 | 7.55231000 | 1.45221400  |
| H | -3.90545400 | 3.60888300 | 1.98546700  |
| H | -4.21635700 | 6.09009100 | 1.95846300  |

**(S)-P<sub>b</sub>**

|   |             |             |             |
|---|-------------|-------------|-------------|
| C | -0.57629200 | -0.75477000 | 0.37860300  |
| O | -0.84330300 | -0.75886200 | 1.77544800  |
| H | -0.37034300 | -1.51104600 | 2.16031000  |
| C | 0.88831100  | -0.44534200 | 0.09852900  |
| C | 1.41373000  | -0.57474700 | -1.18996400 |
| C | 1.72882000  | 0.00912600  | 1.11442600  |
| C | 2.74481900  | -0.27312700 | -1.45256200 |
| H | 0.77654700  | -0.91110100 | -2.00831400 |
| C | 3.06377900  | 0.30547600  | 0.85615700  |
| H | 1.31882800  | 0.14801000  | 2.11313900  |
| C | 3.57848100  | 0.16359500  | -0.42707400 |
| H | 3.13400300  | -0.38278700 | -2.46387100 |
| H | 3.70307500  | 0.65722100  | 1.66489900  |
| H | 4.62252200  | 0.39672000  | -0.63028100 |
| C | -0.97064000 | -2.11031100 | -0.20038300 |
| H | -1.99121600 | -2.36256300 | 0.10899000  |
| H | -0.94030400 | -2.12239100 | -1.29735500 |
| H | -0.28408600 | -2.89015500 | 0.15974300  |
| C | -1.46705200 | 0.37735500  | -0.20395900 |
| C | -2.92788300 | 0.08806900  | -0.00797600 |
| C | -3.79754700 | -0.08626700 | -0.99892700 |

|   |             |             |             |
|---|-------------|-------------|-------------|
| H | -3.25910700 | 0.03257600  | 1.03213900  |
| H | -3.48739000 | -0.03458600 | -2.04393000 |
| H | -4.85237700 | -0.28136200 | -0.81402600 |
| C | -1.12884600 | 1.70637100  | 0.41019800  |
| C | -0.59804600 | 2.72579100  | -0.25732800 |
| H | -1.34879500 | 1.80008700  | 1.47648600  |
| H | -0.37106800 | 3.67480000  | 0.22479700  |
| H | -0.35780900 | 2.64717100  | -1.31883700 |
| H | -1.25586300 | 0.42298600  | -1.28591100 |

**(S)-TS4'**

|   |             |             |             |
|---|-------------|-------------|-------------|
| C | 3.41308400  | 0.66806900  | 1.67282200  |
| C | 0.98759200  | 0.33005900  | 2.90579800  |
| C | 2.19357000  | 0.47476600  | 3.82723300  |
| C | 3.20046500  | 1.31751600  | 3.05607800  |
| H | 4.11891500  | -0.17320800 | 1.77869200  |
| H | 0.53845200  | 1.32429500  | 2.74404500  |
| H | 1.91888200  | 0.92802600  | 4.79106600  |
| H | 2.63828600  | -0.50954100 | 4.04959900  |
| H | 2.79073900  | 2.32999500  | 2.91084300  |
| H | 4.15818100  | 1.43406700  | 3.58234300  |
| C | -0.10570900 | -0.63839500 | 3.24833900  |
| C | -1.33991500 | -0.48962700 | 2.60123900  |
| C | 0.07082800  | -1.73568100 | 4.09419700  |
| C | -2.34214300 | -1.44137800 | 2.73538900  |
| H | -1.49031900 | 0.38557800  | 1.96865100  |
| C | -0.94206600 | -2.68213200 | 4.24843300  |
| H | 1.00695200  | -1.86558000 | 4.63783800  |
| C | -2.14196200 | -2.55143200 | 3.55601200  |
| H | -3.28171500 | -1.31111200 | 2.19534000  |
| H | -0.78586600 | -3.53111300 | 4.91295100  |
| H | -2.92481300 | -3.30018000 | 3.67127800  |
| C | 3.93941600  | 1.62884900  | 0.64124900  |
| C | 5.29454700  | 1.63096800  | 0.30883100  |
| C | 3.09378600  | 2.55768300  | 0.02165200  |
| C | 5.80144100  | 2.53003800  | -0.62573400 |
| H | 5.95931700  | 0.90805600  | 0.78571300  |
| C | 3.59806700  | 3.45349300  | -0.91462600 |
| H | 2.02458700  | 2.56735900  | 0.25845700  |
| C | 4.95202000  | 3.44204000  | -1.24412700 |
| H | 6.86206700  | 2.51509900  | -0.87337300 |
| H | 2.92583800  | 4.16646700  | -1.39128200 |
| H | 5.34267600  | 4.14440600  | -1.97879600 |
| P | 1.73872800  | -0.06512900 | 1.22018300  |



|    |             |             |             |
|----|-------------|-------------|-------------|
| C  | 0.96480700  | -2.69870700 | -2.08379600 |
| C  | -1.40409000 | -3.31387900 | -0.84868100 |
| C  | -0.98789100 | -4.15581600 | -2.07660300 |
| C  | 0.52769200  | -4.15686200 | -2.18759300 |
| H  | 0.57058300  | -2.16052800 | -2.96423800 |
| H  | -1.36326100 | -3.94305300 | 0.05519400  |
| H  | -1.41113800 | -5.16752000 | -2.01161000 |
| H  | -1.41592500 | -3.69530800 | -2.98060700 |
| H  | 0.95706700  | -4.74925500 | -1.36458800 |
| H  | 0.87669200  | -4.61658900 | -3.12398800 |
| C  | -2.79465400 | -2.76462800 | -1.00079000 |
| C  | -3.07675000 | -1.79164600 | -1.96625400 |
| C  | -3.85287600 | -3.29291500 | -0.26045300 |
| C  | -4.38278800 | -1.38903800 | -2.21271800 |
| H  | -2.25620300 | -1.34552200 | -2.53523700 |
| C  | -5.16510700 | -2.89415900 | -0.50561000 |
| H  | -3.64597600 | -4.04708000 | 0.50079000  |
| C  | -5.43470100 | -1.95234400 | -1.49243400 |
| H  | -4.58045900 | -0.62661200 | -2.96489200 |
| H  | -5.97918900 | -3.33046200 | 0.07132500  |
| H  | -6.45955900 | -1.64240200 | -1.69012000 |
| C  | 2.43137000  | -2.39736500 | -1.95692700 |
| C  | 2.87495700  | -1.08384800 | -2.15983500 |
| C  | 3.36987600  | -3.36100600 | -1.58136100 |
| C  | 4.20205200  | -0.73290100 | -1.95296700 |
| H  | 2.15884400  | -0.32083100 | -2.46522300 |
| C  | 4.70508900  | -3.01399500 | -1.37962600 |
| H  | 3.06291900  | -4.39644600 | -1.43569800 |
| C  | 5.12304200  | -1.69868300 | -1.55027600 |
| H  | 4.51602100  | 0.30075800  | -2.09737600 |
| H  | 5.42011200  | -3.78062400 | -1.08400000 |
| H  | 6.16435800  | -1.42583300 | -1.38348900 |
| P  | -0.04557200 | -2.01566600 | -0.63742800 |
| C  | 2.05166200  | -1.89393300 | 1.32316700  |
| C  | 0.86374800  | -2.72662600 | 0.83084800  |
| H  | 2.31939500  | -2.19503900 | 2.34791000  |
| H  | 2.93290700  | -2.08557300 | 0.69451000  |
| H  | 1.18940600  | -3.75470900 | 0.60852100  |
| H  | 0.10500500  | -2.80112800 | 1.62471600  |
| Cu | 0.08358100  | 0.33500600  | -0.51490700 |
| C  | -1.31962800 | 2.93729500  | 0.31008200  |
| O  | -0.48006600 | 2.00276900  | 0.53665300  |
| C  | -2.77896900 | 2.61567800  | 0.38007900  |
| C  | -3.74009400 | 3.59418100  | 0.66172800  |

|   |             |             |             |
|---|-------------|-------------|-------------|
| C | -3.21144600 | 1.29422400  | 0.21750500  |
| C | -5.08443100 | 3.25878300  | 0.78800700  |
| H | -3.43710400 | 4.63147400  | 0.78765300  |
| C | -4.55061700 | 0.95559300  | 0.35713700  |
| H | -2.47870000 | 0.51979000  | -0.01795000 |
| C | -5.49552500 | 1.93830300  | 0.64494400  |
| H | -5.81384900 | 4.03703500  | 1.00933900  |
| H | -4.85327000 | -0.08522200 | 0.23911700  |
| H | -6.54628600 | 1.67436700  | 0.75716700  |
| C | -0.89779600 | 4.31601300  | 0.76478800  |
| H | -1.38321500 | 5.12934200  | 0.21220300  |
| H | -1.14130000 | 4.43724300  | 1.83173900  |
| H | 0.19000300  | 4.40348700  | 0.65367600  |
| C | -1.15017600 | 3.35545000  | -1.82058800 |
| C | -1.04719400 | 2.06180300  | -2.36919600 |
| C | 0.10062700  | 1.29158700  | -2.44252500 |
| H | -1.98808600 | 1.59148000  | -2.68639700 |
| H | 1.07448100  | 1.78588700  | -2.35065600 |
| H | 0.08311200  | 0.39255500  | -3.06445300 |
| C | -2.29002600 | 4.18402600  | -2.17180200 |
| C | -2.32119600 | 5.52424300  | -2.19270600 |
| H | -3.21054300 | 3.63623800  | -2.40558700 |
| H | -3.22686000 | 6.07401800  | -2.43943500 |
| H | -1.42746900 | 6.11629200  | -1.98807200 |
| H | -0.19728800 | 3.87979100  | -1.67581400 |

**(S)-D'**

|   |             |             |            |
|---|-------------|-------------|------------|
| C | 3.20168700  | 0.91592000  | 1.81345500 |
| C | 0.75307000  | 0.26053300  | 2.87877400 |
| C | 1.85582100  | 0.65229600  | 3.85871400 |
| C | 2.77253900  | 1.61385600  | 3.11499300 |
| H | 3.92474400  | 0.12224300  | 2.06815000 |
| H | 0.10056500  | 1.12886400  | 2.68674800 |
| H | 1.43875700  | 1.09251300  | 4.77597400 |
| H | 2.44309900  | -0.22924000 | 4.16572300 |
| H | 2.22110800  | 2.53635100  | 2.86887700 |
| H | 3.65043600  | 1.91407300  | 3.70449500 |
| C | -0.12517500 | -0.91459300 | 3.20435100 |
| C | -1.40240700 | -0.97559700 | 2.62553000 |
| C | 0.30142100  | -1.98733300 | 3.99229000 |
| C | -2.20365700 | -2.09849300 | 2.79444000 |
| H | -1.74226600 | -0.12070700 | 2.03234700 |
| C | -0.50767300 | -3.10871100 | 4.16794700 |
| H | 1.27705800  | -1.95661800 | 4.47823100 |

|   |             |             |             |
|---|-------------|-------------|-------------|
| C | -1.75634300 | -3.17669500 | 3.55740400  |
| H | -3.18537500 | -2.12854900 | 2.32034800  |
| H | -0.15653400 | -3.93428100 | 4.78622700  |
| H | -2.38518400 | -4.05646200 | 3.69142100  |
| C | 3.82066900  | 1.82574400  | 0.79133900  |
| C | 5.19520100  | 1.79606800  | 0.55325800  |
| C | 3.03872200  | 2.72406300  | 0.05717000  |
| C | 5.77554600  | 2.63209100  | -0.39719800 |
| H | 5.81663400  | 1.09794200  | 1.11692400  |
| C | 3.61007700  | 3.55414300  | -0.89930500 |
| H | 1.96025700  | 2.75643600  | 0.23211500  |
| C | 4.98392700  | 3.50901300  | -1.13259500 |
| H | 6.85065000  | 2.59277600  | -0.56805900 |
| H | 2.97798400  | 4.23675000  | -1.46782000 |
| H | 5.43382600  | 4.15816900  | -1.88192000 |
| P | 1.62768100  | 0.06004100  | 1.21542900  |
| C | 1.16465400  | -2.53582700 | -2.25682400 |
| C | -1.13831400 | -3.38330900 | -1.02198800 |
| C | -0.72215900 | -4.08124500 | -2.33354700 |
| C | 0.79086000  | -4.00140800 | -2.46470400 |
| H | 0.75502900  | -1.95476300 | -3.10246700 |
| H | -0.99574200 | -4.07972600 | -0.17935600 |
| H | -1.09671800 | -5.11340700 | -2.35922700 |
| H | -1.19064300 | -3.55565500 | -3.18049600 |
| H | 1.25690200  | -4.63043700 | -1.68963500 |
| H | 1.14880600  | -4.37617900 | -3.43487000 |
| C | -2.56287400 | -2.90919300 | -1.03142200 |
| C | -2.97304000 | -1.89873200 | -1.90836600 |
| C | -3.51520900 | -3.49392100 | -0.19749000 |
| C | -4.30165600 | -1.49972100 | -1.96420000 |
| H | -2.23565000 | -1.40895800 | -2.55114800 |
| C | -4.84890300 | -3.09667000 | -0.24847500 |
| H | -3.20353500 | -4.27316600 | 0.50051100  |
| C | -5.24639800 | -2.10503800 | -1.13813300 |
| H | -4.60058600 | -0.69952100 | -2.64003100 |
| H | -5.57927600 | -3.56800500 | 0.40753800  |
| H | -6.29010300 | -1.79723700 | -1.18542700 |
| C | 2.61517100  | -2.18126200 | -2.08991500 |
| C | 2.99465800  | -0.83657000 | -2.18362500 |
| C | 3.59830100  | -3.12205600 | -1.77623000 |
| C | 4.29867100  | -0.43376000 | -1.93410100 |
| H | 2.23998500  | -0.09024900 | -2.42927400 |
| C | 4.91188300  | -2.72346800 | -1.53084700 |
| H | 3.34617900  | -4.18031600 | -1.71655600 |

|                 |             |             |             |
|-----------------|-------------|-------------|-------------|
| C               | 5.26433800  | -1.38003100 | -1.59509800 |
| H               | 4.55815700  | 0.62329900  | -1.99028700 |
| H               | 5.66218100  | -3.47391600 | -1.28560800 |
| H               | 6.28760000  | -1.06737200 | -1.39044800 |
| P               | 0.12189500  | -2.00363600 | -0.77140400 |
| C               | 2.17573000  | -1.71933400 | 1.19614400  |
| C               | 1.10326600  | -2.67115600 | 0.66258100  |
| H               | 2.49309900  | -2.04029700 | 2.20081100  |
| H               | 3.06563500  | -1.74382800 | 0.54831700  |
| H               | 1.54897100  | -3.64066200 | 0.39049000  |
| H               | 0.35779800  | -2.87165500 | 1.44630100  |
| Cu              | -0.24334200 | 0.24869500  | -0.40538300 |
| C               | -1.75675800 | 2.65812100  | 0.35162000  |
| O               | -1.30683400 | 1.43177000  | 0.76012200  |
| C               | -3.26825400 | 2.64198000  | 0.07520300  |
| C               | -4.01260500 | 3.81410600  | -0.11012200 |
| C               | -3.94888300 | 1.42322600  | 0.04534000  |
| C               | -5.38488900 | 3.77026900  | -0.32980000 |
| H               | -3.51536000 | 4.78330400  | -0.07707000 |
| C               | -5.32398700 | 1.37679400  | -0.17032900 |
| H               | -3.37563300 | 0.50949200  | 0.21192200  |
| C               | -6.04922000 | 2.54755000  | -0.36058000 |
| H               | -5.93898100 | 4.69855900  | -0.46718400 |
| H               | -5.83156900 | 0.41208800  | -0.17661700 |
| H               | -7.12591300 | 2.50973200  | -0.52237800 |
| C               | -1.44499700 | 3.68366400  | 1.44860900  |
| H               | -1.70936100 | 4.71727500  | 1.18869100  |
| H               | -1.98252900 | 3.40310900  | 2.36371200  |
| H               | -0.36499100 | 3.64755900  | 1.66158500  |
| C               | -0.96025000 | 3.06569800  | -0.94825200 |
| C               | -0.97571100 | 1.90468000  | -1.89731100 |
| C               | 0.12240300  | 1.38898900  | -2.48314800 |
| H               | -1.96488600 | 1.50157600  | -2.14592600 |
| H               | 1.10934700  | 1.82035700  | -2.29465600 |
| H               | 0.05741600  | 0.59690400  | -3.23087100 |
| C               | -1.38677200 | 4.31380800  | -1.66021600 |
| C               | -0.72326800 | 5.46764100  | -1.60341700 |
| H               | -2.30458100 | 4.24721400  | -2.25141100 |
| H               | -1.06461400 | 6.35925100  | -2.12605100 |
| H               | 0.18996500  | 5.56521000  | -1.01249900 |
| H               | 0.08048500  | 3.21099900  | -0.60695700 |
| <b>(S)-TS5'</b> |             |             |             |
| C               | -1.52066400 | 3.10654500  | -1.44403600 |

|   |             |             |             |
|---|-------------|-------------|-------------|
| C | -2.95711800 | 0.97749700  | -2.42768500 |
| C | -3.55765300 | 2.36533100  | -2.65042700 |
| C | -2.39690900 | 3.34048700  | -2.69093300 |
| H | -1.96636500 | 3.63275100  | -0.58327300 |
| H | -2.36378400 | 0.71446000  | -3.32108500 |
| H | -4.16654900 | 2.39177000  | -3.56595900 |
| H | -4.22441400 | 2.63371200  | -1.81648400 |
| H | -1.78915100 | 3.15094000  | -3.58957000 |
| H | -2.72011300 | 4.38907500  | -2.74564200 |
| C | -3.92017000 | -0.14252400 | -2.15332100 |
| C | -3.57627600 | -1.45368700 | -2.50254800 |
| C | -5.15660800 | 0.06641500  | -1.53161900 |
| C | -4.41632800 | -2.52067200 | -2.20813200 |
| H | -2.63319000 | -1.63883500 | -3.01592400 |
| C | -5.99800700 | -1.00071900 | -1.23205500 |
| H | -5.47760700 | 1.07529600  | -1.27579500 |
| C | -5.62878900 | -2.30098800 | -1.55961000 |
| H | -4.12184000 | -3.52918100 | -2.49651100 |
| H | -6.95386700 | -0.81078200 | -0.74582000 |
| H | -6.28927500 | -3.13512100 | -1.32860700 |
| C | -0.11592200 | 3.59593400  | -1.65994200 |
| C | 0.32331500  | 4.78218100  | -1.07229300 |
| C | 0.74721000  | 2.91740400  | -2.52656000 |
| C | 1.58932400  | 5.28953700  | -1.35424400 |
| H | -0.33958300 | 5.31640100  | -0.38863900 |
| C | 2.00647700  | 3.42367300  | -2.81554800 |
| H | 0.43378700  | 1.96776500  | -2.96931500 |
| C | 2.43058800  | 4.61599900  | -2.23222300 |
| H | 1.91832200  | 6.21579900  | -0.88482100 |
| H | 2.66957200  | 2.86954200  | -3.47965600 |
| H | 3.42253400  | 5.00831600  | -2.45011300 |
| P | -1.65139600 | 1.25958600  | -1.06645300 |
| C | -0.91399100 | -0.38011200 | 3.28555800  |
| C | -1.61348500 | -2.64000500 | 1.88388700  |
| C | -1.12518900 | -2.81812900 | 3.32476700  |
| C | -1.51727500 | -1.54689600 | 4.06663600  |
| H | 0.17402300  | -0.39744700 | 3.44387200  |
| H | -2.71621500 | -2.65353500 | 1.90422700  |
| H | -1.55401000 | -3.72360200 | 3.77529900  |
| H | -0.02940400 | -2.93587200 | 3.34774300  |
| H | -2.61640400 | -1.47649500 | 4.09015100  |
| H | -1.17454600 | -1.54187800 | 5.11092900  |
| C | -1.14530100 | -3.62833800 | 0.85997800  |
| C | 0.20888900  | -3.94137400 | 0.70539500  |

|    |             |             |             |
|----|-------------|-------------|-------------|
| C  | -2.06809400 | -4.21572500 | -0.00789800 |
| C  | 0.62311800  | -4.82748900 | -0.28212400 |
| H  | 0.95244900  | -3.47405900 | 1.35566700  |
| C  | -1.65501200 | -5.09931000 | -1.00114400 |
| H  | -3.12726800 | -3.97099500 | 0.09697600  |
| C  | -0.30658800 | -5.40897500 | -1.14117000 |
| H  | 1.68276500  | -5.05806400 | -0.39254200 |
| H  | -2.39062500 | -5.55046800 | -1.66632700 |
| H  | 0.02195200  | -6.09786200 | -1.91716300 |
| C  | -1.39689600 | 1.01408700  | 3.56237000  |
| C  | -0.56955500 | 2.08850800  | 3.20996800  |
| C  | -2.66410500 | 1.29727600  | 4.07816000  |
| C  | -1.00682000 | 3.40073700  | 3.33119100  |
| H  | 0.43523300  | 1.89138500  | 2.83453700  |
| C  | -3.10154500 | 2.61367200  | 4.20851300  |
| H  | -3.32582500 | 0.48732100  | 4.38531100  |
| C  | -2.28164700 | 3.66992800  | 3.82598200  |
| H  | -0.33889100 | 4.21193300  | 3.04178500  |
| H  | -4.09250200 | 2.81142900  | 4.61506300  |
| H  | -2.62933400 | 4.69694700  | 3.92547300  |
| P  | -1.13309900 | -0.86628800 | 1.45572000  |
| C  | -2.71996200 | 1.24032000  | 0.45592700  |
| C  | -2.80288900 | -0.16792800 | 1.03744400  |
| H  | -3.72498400 | 1.63687200  | 0.24974500  |
| H  | -2.25083800 | 1.92370900  | 1.17871400  |
| H  | -3.45387200 | -0.18596800 | 1.92471500  |
| H  | -3.23769100 | -0.86865200 | 0.30523000  |
| Cu | 0.14235700  | -0.30799900 | -0.45165600 |
| C  | 3.33756800  | 0.52807900  | 0.01701900  |
| O  | 2.10008000  | 0.29598000  | -0.58850000 |
| C  | 2.22389600  | -0.95236600 | -2.88361400 |
| C  | 3.56064000  | -1.45473900 | -3.21562600 |
| H  | 2.31127300  | -0.26927900 | -1.74728300 |
| C  | 4.41249700  | -0.90478600 | -4.08860200 |
| H  | 3.89082600  | -2.32710600 | -2.63815800 |
| H  | 5.41478600  | -1.29884000 | -4.24124700 |
| H  | 4.13016500  | -0.03333200 | -4.68321700 |
| C  | 1.23147700  | -1.86497900 | -2.38469000 |
| H  | 1.61885500  | -2.76124500 | -1.88360200 |
| C  | -0.11708700 | -1.64422400 | -2.29449100 |
| H  | -0.57031000 | -0.86696600 | -2.91636400 |
| H  | -0.78183900 | -2.41858400 | -1.90784000 |
| H  | 1.83689600  | -0.19094400 | -3.57937200 |
| C  | 4.07007000  | -0.78163800 | 0.33698500  |

|   |            |             |             |
|---|------------|-------------|-------------|
| C | 5.43450600 | -0.80473600 | 0.63807800  |
| C | 3.37144200 | -1.98879900 | 0.39178700  |
| C | 6.08045400 | -1.99217900 | 0.96664800  |
| H | 6.01253600 | 0.11860600  | 0.61982500  |
| C | 4.01136400 | -3.17903000 | 0.72249200  |
| H | 2.30573200 | -1.97953900 | 0.16720800  |
| C | 5.37270300 | -3.18856000 | 1.00828600  |
| H | 7.14654000 | -1.98077900 | 1.19088100  |
| H | 3.43997200 | -4.10801600 | 0.76378300  |
| H | 5.87751600 | -4.11927700 | 1.26325400  |
| C | 4.17761800 | 1.39980700  | -0.92069800 |
| H | 3.62632800 | 2.32193000  | -1.13886100 |
| H | 5.14328800 | 1.68436600  | -0.48230200 |
| H | 4.37052000 | 0.86732900  | -1.86322900 |
| C | 3.12992500 | 1.29976600  | 1.35509100  |
| C | 2.32415000 | 2.55291000  | 1.13289000  |
| C | 2.57066900 | 3.70843800  | 1.74693400  |
| H | 1.50133500 | 2.46890600  | 0.41394300  |
| H | 3.38930800 | 3.81373200  | 2.46190800  |
| H | 1.97002800 | 4.59792300  | 1.55689200  |
| C | 2.49447000 | 0.41805500  | 2.38924300  |
| C | 2.89694100 | 0.33042700  | 3.65458500  |
| H | 1.64764300 | -0.17688400 | 2.03390200  |
| H | 2.40973000 | -0.32379600 | 4.37746400  |
| H | 3.74514800 | 0.91095100  | 4.02154200  |
| H | 4.12309400 | 1.59422400  | 1.73821600  |

**(R)-TS4'**

|   |             |             |            |
|---|-------------|-------------|------------|
| C | -2.26432200 | -2.40980700 | 1.55662800 |
| C | -0.28244700 | -0.91741000 | 2.73643500 |
| C | -1.01711900 | -1.91455400 | 3.62805600 |
| C | -1.46904500 | -3.04299500 | 2.71287800 |
| H | -3.25757300 | -2.11512700 | 1.93654700 |
| H | 0.65221700  | -1.37854000 | 2.37669200 |
| H | -0.37798100 | -2.26770600 | 4.45017800 |
| H | -1.90468400 | -1.44878300 | 4.08738900 |
| H | -0.58593900 | -3.55892800 | 2.30030700 |
| H | -2.07088800 | -3.80365700 | 3.22962200 |
| C | 0.04224400  | 0.44409900  | 3.27821900 |
| C | 1.08999100  | 1.16596400  | 2.68996000 |
| C | -0.70094100 | 1.06008900  | 4.28817400 |
| C | 1.35946500  | 2.47392000  | 3.07047400 |
| H | 1.67570600  | 0.68030300  | 1.90893700 |
| C | -0.42794900 | 2.37120500  | 4.67539800 |

|   |             |             |             |
|---|-------------|-------------|-------------|
| H | -1.50600000 | 0.51678800  | 4.78341800  |
| C | 0.59340100  | 3.08840400  | 4.06017700  |
| H | 2.17461800  | 3.01223900  | 2.58600700  |
| H | -1.01948200 | 2.83300100  | 5.46496700  |
| H | 0.80346400  | 4.11372600  | 4.36251300  |
| C | -2.44226600 | -3.32095300 | 0.37446900  |
| C | -3.66761300 | -3.94970100 | 0.14972900  |
| C | -1.38614700 | -3.57882000 | -0.50695000 |
| C | -3.84435900 | -4.80952100 | -0.93087400 |
| H | -4.49780800 | -3.75074700 | 0.83002600  |
| C | -1.56107500 | -4.43091600 | -1.59137500 |
| H | -0.42086600 | -3.08700200 | -0.35400800 |
| C | -2.79157300 | -5.04797400 | -1.80868700 |
| H | -4.80939000 | -5.28934600 | -1.08942300 |
| H | -0.73077800 | -4.61192800 | -2.27300200 |
| H | -2.92658800 | -5.71426000 | -2.65905200 |
| P | -1.32677200 | -0.82364200 | 1.16146000  |
| C | -2.53104000 | 2.22589400  | -1.71130900 |
| C | -0.68461700 | 3.81813300  | -0.46126600 |
| C | -1.61517900 | 4.47803500  | -1.50094600 |
| C | -2.91931100 | 3.69466500  | -1.57038600 |
| H | -2.01532900 | 2.09877700  | -2.67964700 |
| H | -0.91117800 | 4.20742200  | 0.54504300  |
| H | -1.77511700 | 5.53827400  | -1.26361500 |
| H | -1.12783700 | 4.44949900  | -2.48732400 |
| H | -3.49320900 | 3.85268600  | -0.64373800 |
| H | -3.55980700 | 4.02694800  | -2.40063800 |
| C | 0.78085700  | 4.00909700  | -0.73695800 |
| C | 1.34719600  | 3.57402300  | -1.94066600 |
| C | 1.61569300  | 4.60123300  | 0.21062200  |
| C | 2.70352800  | 3.73751000  | -2.19265200 |
| H | 0.71702900  | 3.08338900  | -2.68683800 |
| C | 2.97699700  | 4.76205300  | -0.03468300 |
| H | 1.18958700  | 4.94184600  | 1.15604000  |
| C | 3.52515800  | 4.33373000  | -1.23861200 |
| H | 3.12497200  | 3.38108800  | -3.13228600 |
| H | 3.61034200  | 5.22819100  | 0.71902600  |
| H | 4.58918000  | 4.45771000  | -1.43243600 |
| C | -3.59810800 | 1.17605300  | -1.59185600 |
| C | -3.29382800 | -0.14191800 | -1.95765300 |
| C | -4.86610000 | 1.44250100  | -1.07154600 |
| C | -4.21302500 | -1.16674000 | -1.78116600 |
| H | -2.30828800 | -0.36999300 | -2.36618200 |
| C | -5.79321000 | 0.41591700  | -0.89666900 |



|    |             |             |             |
|----|-------------|-------------|-------------|
| H  | -5.14083400 | 2.46045300  | -0.79622200 |
| C  | -5.46731000 | -0.89185900 | -1.23866800 |
| H  | -3.94342900 | -2.18689700 | -2.05398000 |
| H  | -6.77654500 | 0.64477100  | -0.48783000 |
| H  | -6.18889300 | -1.69517800 | -1.09428300 |
| P  | -1.16882900 | 1.99118900  | -0.42807300 |
| C  | -2.59581300 | 0.48413400  | 1.54234600  |
| C  | -2.13536900 | 1.89486400  | 1.16523400  |
| H  | -2.88364800 | 0.45735500  | 2.60515300  |
| H  | -3.48856700 | 0.20922400  | 0.96066200  |
| H  | -2.99583700 | 2.58097300  | 1.13518600  |
| H  | -1.44768200 | 2.28137500  | 1.93233100  |
| Cu | 0.05991900  | 0.04157200  | -0.63135600 |
| C  | 2.89763100  | -0.67627400 | -0.21305100 |
| O  | 1.69570800  | -0.81648300 | 0.19975600  |
| C  | 2.79200400  | -1.30750900 | -2.30110100 |
| C  | 1.74121300  | -0.48951100 | -2.76488600 |
| C  | 0.38145900  | -0.70886500 | -2.62868800 |
| H  | 2.04700200  | 0.47039500  | -3.20429500 |
| H  | 0.01842000  | -1.72418300 | -2.43937100 |
| H  | -0.29904300 | -0.06084000 | -3.18666300 |
| C  | 4.10870500  | -1.14497900 | -2.89231100 |
| C  | 5.09900300  | -2.04780600 | -2.88645400 |
| H  | 4.29239100  | -0.17014300 | -3.36211500 |
| H  | 6.06809400  | -1.84061200 | -3.33559900 |
| H  | 4.96624300  | -3.03379900 | -2.43806000 |
| H  | 2.51363700  | -2.32542900 | -2.00329100 |
| C  | 3.40700600  | 0.73765300  | -0.37887000 |
| H  | 2.58198100  | 1.37769700  | -0.71818000 |
| H  | 3.74707800  | 1.12484800  | 0.59706800  |
| H  | 4.24171800  | 0.83604100  | -1.08362700 |
| C  | 3.86709500  | -1.72704700 | 0.20310700  |
| C  | 5.24903700  | -1.51942700 | 0.20689100  |
| C  | 3.37992500  | -2.97591600 | 0.61281100  |
| C  | 6.11967200  | -2.52844600 | 0.61131300  |
| H  | 5.65354000  | -0.55934200 | -0.10737500 |
| C  | 4.24616600  | -3.98655100 | 0.99884500  |
| H  | 2.30097300  | -3.13101700 | 0.61818300  |
| C  | 5.62405100  | -3.76600700 | 1.00189500  |
| H  | 7.19329900  | -2.34466400 | 0.61136900  |
| H  | 3.84872500  | -4.95227100 | 1.30965300  |
| H  | 6.30532500  | -4.55755800 | 1.31100000  |

**(R)-D'**

|   |             |             |             |
|---|-------------|-------------|-------------|
| C | -2.00982200 | -2.59748800 | 1.52532200  |
| C | -0.18040800 | -0.93677400 | 2.72210500  |
| C | -0.83867900 | -1.98086100 | 3.61899300  |
| C | -1.19225000 | -3.14874000 | 2.71069800  |
| H | -3.04879200 | -2.42294200 | 1.85383800  |
| H | 0.77712100  | -1.33033100 | 2.34028800  |
| H | -0.17676200 | -2.27786200 | 4.44542300  |
| H | -1.76228300 | -1.58534700 | 4.07365500  |
| H | -0.26525300 | -3.60010900 | 2.32099000  |
| H | -1.74357300 | -3.94728900 | 3.22673800  |
| C | 0.06115300  | 0.44292100  | 3.26307900  |
| C | 1.04567800  | 1.22981600  | 2.64830300  |
| C | -0.69484500 | 1.00312100  | 4.29556200  |
| C | 1.24123500  | 2.54973200  | 3.03359300  |
| H | 1.63328900  | 0.77247200  | 1.84773400  |
| C | -0.49581100 | 2.32787900  | 4.68316100  |
| H | -1.44958100 | 0.40713200  | 4.80934600  |
| C | 0.46333300  | 3.10968600  | 4.04680300  |
| H | 2.01148800  | 3.14078500  | 2.53650600  |
| H | -1.09523300 | 2.74846900  | 5.48979300  |
| H | 0.61701500  | 4.14433600  | 4.35205800  |
| C | -2.01236200 | -3.51120700 | 0.33176800  |
| C | -3.12878700 | -4.29791300 | 0.04672000  |
| C | -0.88978500 | -3.61345900 | -0.49915100 |
| C | -3.13612000 | -5.16252300 | -1.04490500 |
| H | -4.00949100 | -4.22152300 | 0.68737000  |
| C | -0.89688500 | -4.47148300 | -1.59298600 |
| H | -0.00574000 | -3.00037100 | -0.29469600 |
| C | -2.02126400 | -5.24638900 | -1.87277100 |
| H | -4.01797300 | -5.76723100 | -1.25260600 |
| H | -0.01535800 | -4.53520300 | -2.23084000 |
| H | -2.02459000 | -5.91547800 | -2.73171700 |
| P | -1.24478200 | -0.91366500 | 1.16706300  |
| C | -2.74626800 | 2.00380900  | -1.66641300 |
| C | -1.02611200 | 3.76795000  | -0.46955600 |
| C | -2.02719600 | 4.32980500  | -1.50041200 |
| C | -3.25836100 | 3.43481300  | -1.53328700 |
| H | -2.24412500 | 1.91206200  | -2.64621700 |
| H | -1.27746100 | 4.14669200  | 0.53453500  |
| H | -2.27432800 | 5.37528600  | -1.27243900 |
| H | -1.55699600 | 4.33139500  | -2.49566000 |
| H | -3.82680600 | 3.55447200  | -0.59757700 |
| H | -3.94145000 | 3.69865400  | -2.35409200 |
| C | 0.41365100  | 4.08152000  | -0.76629900 |

|    |             |             |             |
|----|-------------|-------------|-------------|
| C  | 1.00195500  | 3.67748400  | -1.97068700 |
| C  | 1.20837600  | 4.74750700  | 0.16569900  |
| C  | 2.34115100  | 3.93499400  | -2.23519100 |
| H  | 0.40336300  | 3.13466700  | -2.70764200 |
| C  | 2.55206000  | 5.00687200  | -0.09368400 |
| H  | 0.76560700  | 5.06219500  | 1.11216200  |
| C  | 3.12293400  | 4.60274000  | -1.29486300 |
| H  | 2.78121100  | 3.60047700  | -3.17474100 |
| H  | 3.15400000  | 5.52767000  | 0.64969900  |
| H  | 4.17418700  | 4.79970900  | -1.49730400 |
| C  | -3.71963000 | 0.86938600  | -1.52134600 |
| C  | -3.32134300 | -0.41610000 | -1.90958900 |
| C  | -4.98677400 | 1.02434200  | -0.95577300 |
| C  | -4.14440700 | -1.51623100 | -1.71404600 |
| H  | -2.33572600 | -0.55922700 | -2.35448800 |
| C  | -5.81707300 | -0.07825100 | -0.75753500 |
| H  | -5.33641800 | 2.01286400  | -0.65959000 |
| C  | -5.39609700 | -1.35221800 | -1.12392700 |
| H  | -3.80095700 | -2.50543000 | -2.01503800 |
| H  | -6.80041200 | 0.06455000  | -0.31128400 |
| H  | -6.04135900 | -2.21456700 | -0.96159100 |
| P  | -1.33672500 | 1.90319700  | -0.41475000 |
| C  | -2.60943500 | 0.28088500  | 1.57788700  |
| C  | -2.24294800 | 1.72353700  | 1.20725000  |
| H  | -2.87678800 | 0.23047500  | 2.64475500  |
| H  | -3.48967600 | -0.04894900 | 1.00542900  |
| H  | -3.14110700 | 2.36013300  | 1.21606700  |
| H  | -1.55225700 | 2.13562000  | 1.96061200  |
| Cu | 0.11610700  | 0.10535200  | -0.51792800 |
| C  | 2.93718200  | -0.50177300 | -0.44424300 |
| O  | 1.76569300  | -0.65043400 | 0.23995500  |
| C  | 2.67049900  | -0.89331200 | -1.97696500 |
| C  | 1.53329700  | -0.09154700 | -2.51568200 |
| C  | 0.31022500  | -0.56219400 | -2.82726400 |
| H  | 1.73754100  | 0.97238700  | -2.68665400 |
| H  | 0.05858500  | -1.62072900 | -2.73330800 |
| H  | -0.43825900 | 0.08307500  | -3.28990800 |
| C  | 3.85577900  | -0.74042500 | -2.87882800 |
| C  | 4.67768800  | -1.72671400 | -3.23084300 |
| H  | 4.05226600  | 0.27443900  | -3.24342500 |
| H  | 5.54457600  | -1.55520100 | -3.86612700 |
| H  | 4.52553000  | -2.74607100 | -2.87195700 |
| H  | 2.37093200  | -1.95483300 | -1.93465000 |
| C  | 3.43547500  | 0.94624300  | -0.35306900 |

|   |            |             |             |
|---|------------|-------------|-------------|
| H | 2.59622500 | 1.61993600  | -0.57837200 |
| H | 3.76580500 | 1.15954800  | 0.67353400  |
| H | 4.26452000 | 1.18934400  | -1.03470200 |
| C | 3.97576100 | -1.49349800 | 0.08176700  |
| C | 5.35082900 | -1.25493000 | 0.05944300  |
| C | 3.53070100 | -2.72245200 | 0.57695000  |
| C | 6.25355200 | -2.21251500 | 0.51453700  |
| H | 5.73168700 | -0.30896300 | -0.32348500 |
| C | 4.42701600 | -3.68506000 | 1.02532300  |
| H | 2.45531000 | -2.89779200 | 0.61509200  |
| C | 5.79636900 | -3.43402900 | 0.99606500  |
| H | 7.32211700 | -2.00009200 | 0.49045600  |
| H | 4.05497200 | -4.63581500 | 1.40736900  |
| H | 6.50195300 | -4.18395600 | 1.35192600  |

**(R)-TS5'**

|   |             |             |             |
|---|-------------|-------------|-------------|
| C | 3.02008100  | 1.17165400  | -1.39454300 |
| C | 0.89683500  | 1.96068500  | -2.89897900 |
| C | 2.27317000  | 1.90823800  | -3.58932800 |
| C | 3.13642900  | 0.87037700  | -2.89026000 |
| H | 3.34987500  | 2.21596800  | -1.24376600 |
| H | 0.24068800  | 1.22909600  | -3.39177900 |
| H | 2.15245800  | 1.70518400  | -4.66188800 |
| H | 2.76878100  | 2.88713200  | -3.51245300 |
| H | 2.77146800  | -0.15093000 | -3.09360700 |
| H | 4.18488400  | 0.90647700  | -3.21722500 |
| C | 0.21006400  | 3.29767600  | -2.92908300 |
| C | -1.14445000 | 3.38764100  | -3.26736500 |
| C | 0.87866400  | 4.48292900  | -2.59714100 |
| C | -1.81621900 | 4.60550400  | -3.23965600 |
| H | -1.68217900 | 2.48486900  | -3.55657900 |
| C | 0.21054000  | 5.70202600  | -2.56552600 |
| H | 1.94305000  | 4.45812800  | -2.35861100 |
| C | -1.14372500 | 5.76816600  | -2.87822400 |
| H | -2.87039500 | 4.64339500  | -3.51013100 |
| H | 0.75516500  | 6.60665700  | -2.29888500 |
| H | -1.66688100 | 6.72258200  | -2.85422700 |
| C | 3.84404600  | 0.29125100  | -0.50644600 |
| C | 4.89559400  | 0.84479100  | 0.22889200  |
| C | 3.64754400  | -1.09158900 | -0.45555400 |
| C | 5.74288200  | 0.04026700  | 0.98390000  |
| H | 5.05207400  | 1.92485400  | 0.20437700  |
| C | 4.49342400  | -1.89825000 | 0.29787700  |
| H | 2.82594000  | -1.54865400 | -1.01075100 |

|   |             |             |             |
|---|-------------|-------------|-------------|
| C | 5.54628400  | -1.33711300 | 1.01740300  |
| H | 6.56034700  | 0.49238400  | 1.54504600  |
| H | 4.31527400  | -2.97274900 | 0.32111800  |
| H | 6.20972400  | -1.97248000 | 1.60267400  |
| P | 1.15399700  | 1.21676900  | -1.14676500 |
| C | -0.61911800 | 1.52666000  | 3.16599800  |
| C | -2.90810200 | 1.88950700  | 1.71703200  |
| C | -2.95434800 | 2.21297200  | 3.22800100  |
| C | -1.56287300 | 2.59807600  | 3.70055400  |
| H | -0.89250000 | 0.56348800  | 3.63218300  |
| H | -3.05664700 | 2.81673400  | 1.14031900  |
| H | -3.70307800 | 2.98972000  | 3.43401600  |
| H | -3.28138900 | 1.31236400  | 3.76993200  |
| H | -1.29345800 | 3.58654400  | 3.29602400  |
| H | -1.50231200 | 2.67689500  | 4.79610500  |
| C | -3.96122800 | 0.88975600  | 1.32591100  |
| C | -3.87969000 | -0.43406500 | 1.77080400  |
| C | -5.06067200 | 1.26374900  | 0.55357600  |
| C | -4.85812600 | -1.36198700 | 1.44447300  |
| H | -3.02525600 | -0.75043900 | 2.37173100  |
| C | -6.05589100 | 0.34122900  | 0.23630400  |
| H | -5.13832200 | 2.29204700  | 0.19666600  |
| C | -5.95734100 | -0.97338200 | 0.67975400  |
| H | -4.75049000 | -2.39402800 | 1.77729600  |
| H | -6.90759100 | 0.65102400  | -0.36719600 |
| H | -6.72854100 | -1.69777800 | 0.42225800  |
| C | 0.85715400  | 1.72965700  | 3.32868000  |
| C | 1.70626500  | 0.63540400  | 3.12573800  |
| C | 1.42665400  | 2.97088100  | 3.61689300  |
| C | 3.08479400  | 0.78374600  | 3.16285700  |
| H | 1.27294600  | -0.34747300 | 2.93178100  |
| C | 2.81198100  | 3.11934300  | 3.66893800  |
| H | 0.79149100  | 3.83585000  | 3.80547300  |
| C | 3.64452100  | 2.03298100  | 3.42752600  |
| H | 3.72663500  | -0.07620100 | 2.96730400  |
| H | 3.23949500  | 4.09505500  | 3.89641100  |
| H | 4.72710600  | 2.15228500  | 3.45206400  |
| P | -1.13567400 | 1.32191100  | 1.35311700  |
| C | 1.02246100  | 2.61340200  | 0.06967300  |
| C | -0.39596400 | 2.85354600  | 0.58331700  |
| H | 1.42930800  | 3.54009000  | -0.35737800 |
| H | 1.69183800  | 2.32122400  | 0.89468600  |
| H | -0.40451000 | 3.69668100  | 1.29063000  |
| H | -1.05532300 | 3.13390600  | -0.25554400 |

|    |             |             |             |
|----|-------------|-------------|-------------|
| Cu | -0.62757300 | -0.21122700 | -0.40774200 |
| C  | -0.37393900 | -3.39596000 | -0.00549700 |
| O  | -0.99329400 | -2.18733100 | -0.30389700 |
| C  | -2.84344100 | -2.02768200 | -2.12646200 |
| C  | -3.98733800 | -2.93730600 | -2.01499400 |
| H  | -1.95582200 | -2.28663200 | -1.16605900 |
| C  | -4.18408500 | -4.04760800 | -2.73366000 |
| H  | -4.71125800 | -2.68050500 | -1.23257100 |
| H  | -5.03570500 | -4.70220200 | -2.56118200 |
| H  | -3.49264500 | -4.34027800 | -3.52591900 |
| C  | -3.00085200 | -0.66032200 | -1.72685000 |
| H  | -3.81009200 | -0.46410000 | -1.01655900 |
| C  | -2.14368800 | 0.37643700  | -1.99690300 |
| H  | -1.44773300 | 0.28486100  | -2.83577400 |
| H  | -2.39910300 | 1.39117800  | -1.68533800 |
| H  | -2.22789800 | -2.18120900 | -3.02668300 |
| C  | 0.07143300  | -3.37934100 | 1.49152600  |
| C  | 1.34648500  | -2.61572300 | 1.70702300  |
| C  | 2.27503500  | -2.95622900 | 2.59781700  |
| H  | 1.47568900  | -1.71278900 | 1.09727400  |
| H  | 2.16253900  | -3.84477400 | 3.22231800  |
| H  | 3.18380600  | -2.37017300 | 2.73662900  |
| C  | -1.00042000 | -2.77468800 | 2.35310600  |
| C  | -1.74030300 | -3.44059700 | 3.23651700  |
| H  | -1.13433300 | -1.69694100 | 2.22240500  |
| H  | -2.48974600 | -2.94502100 | 3.85395000  |
| H  | -1.62776900 | -4.51683600 | 3.37831900  |
| H  | 0.22746400  | -4.41916200 | 1.82774900  |
| C  | -1.38830600 | -4.53059500 | -0.19498800 |
| H  | -0.95095500 | -5.50793000 | 0.05201500  |
| H  | -2.26368000 | -4.35569700 | 0.44690000  |
| H  | -1.73496000 | -4.56353500 | -1.23632000 |
| C  | 0.80527100  | -3.66057600 | -0.94370900 |
| C  | 0.90213800  | -2.95788000 | -2.14646300 |
| C  | 1.76573400  | -4.64015100 | -0.67311100 |
| C  | 1.93189900  | -3.21681500 | -3.04833400 |
| H  | 0.15648900  | -2.19157400 | -2.36017900 |
| C  | 2.80121000  | -4.89505400 | -1.56639200 |
| H  | 1.71235000  | -5.20811800 | 0.25669700  |
| C  | 2.89144100  | -4.18130100 | -2.75896900 |
| H  | 1.98223800  | -2.66100300 | -3.98510600 |
| H  | 3.54218700  | -5.65842000 | -1.33079900 |
| H  | 3.70089600  | -4.38101400 | -3.45934300 |
